# Supplementary material for: Genome-Wide Identification of miRNAs Responsive to Drought in Peach (Prunus persica) by High-Throughput Deep Sequencing
Source: PLoS One. 2012 Dec 5;7(12):e50298. doi: 10.1371/journal.pone.0050298 (PMC3515591; doi:10.1371/journal.pone.0050298)
Supplement: Table S5 — Prunus miRNA targets. (XLSX) [file pone.0050298.s006.xlsx]

## Sheet: LC Target
miRNA Identity	Number of the Target	Target Identity
LC-m0002_3p	3	ppa012437m|PACid:17648072[]~~ppa013211m|PACid:17655878[]~~ppa017834m|PACid:17641445[]
LC-m0003_5p	12	ppb015325m|PACid:17642759[]~~ppa022929m|PACid:17653634[]~~ppb017580m|PACid:17668226[]~~ppb024275m|PACid:17664293[]~~ppa021863m|PACid:17667439[]~~ppa022678m|PACid:17669242[]~~ppb012973m|PACid:17652586[]~~ppa015029m|PACid:17658514[]~~ppa022215m|PACid:17645551[]~~ppa025043m|PACid:17666181[]~~ppa015516m|PACid:17644898[]~~ppa014651m|PACid:17650353[]
LC-m0004_5p	1	ppa003448m|PACid:17648358[]
LC-m0006_3p	4	ppa012594m|PACid:17663215[]~~ppa003074m|PACid:17651829[]~~ppa004781m|PACid:17662693[]~~ppa015790m|PACid:17656910[]
LC-m0009_3p	1	ppa004515m|PACid:17652373[]
LC-m0010_3p	3	ppa012437m|PACid:17648072[]~~ppa013211m|PACid:17655878[]~~ppa017834m|PACid:17641445[]
LC-m0012_3p	1	ppa026908m|PACid:17656743[]
LC-m0014_3p	1	ppa007909m|PACid:17657836[]
LC-m0015_5p	1	ppa021337m|PACid:17641303[]
LC-m0016_3p	2	ppa006634m|PACid:17655522[]~~ppa012173m|PACid:17666161[]
LC-m0017_3p	22	ppb024266m|PACid:17667129[]~~ppa014805m|PACid:17654682[]~~ppa001010m|PACid:17646217[]~~ppa002873m|PACid:17646454[]~~ppa005870m|PACid:17662402[]~~ppa016819m|PACid:17665151[]~~ppa1027175m|PACid:17654226[]~~ppa016435m|PACid:17668357[]~~ppa019519m|PACid:17661868[]~~ppa025207m|PACid:17668203[]~~ppa026334m|PACid:17660376[]~~ppb000367m|PACid:17653109[]~~ppa017081m|PACid:17654789[]~~ppa000373m|PACid:1764…
LC-m0018_3p	41	ppa015313m|PACid:17653536[]~~ppa025931m|PACid:17641814[]~~ppa017433m|PACid:17649403[]~~ppa022023m|PACid:17662758[]~~ppa026003m|PACid:17641205[]~~ppb014730m|PACid:17641227[]~~ppa020719m|PACid:17658044[]~~ppa000953m|PACid:17660995[]~~ppa026111m|PACid:17662995[]~~ppa019385m|PACid:17654769[]~~ppa001090m|PACid:17658188[]~~ppa016819m|PACid:17665151[]~~ppa021718m|PACid:17647832[]~~ppa014763m|PACid:17662…
LC-m0019_5p	4	ppa003578m|PACid:17653567[]~~ppa000538m|PACid:17651196[]~~ppa013273m|PACid:17658595[]~~ppa017059m|PACid:17649718[]
LC-m0020_3p	1	ppa015660m|PACid:17657187[]
LC-m0021_3p	1	ppa007826m|PACid:17660405[]
LC-m0023_5p	3	ppa014378m|PACid:17668275[]~~ppa003234m|PACid:17644268[]~~ppa023105m|PACid:17640814[]
LC-m0025_3p	6	ppa009397m|PACid:17656533[]~~ppa015730m|PACid:17660744[]~~ppa003154m|PACid:17650304[]~~ppa004613m|PACid:17651940[]~~ppa024435m|PACid:17650881[]~~ppa025234m|PACid:17662545[]
LC-m0026_5p	1	ppa005679m|PACid:17651251[]
LC-m0027_3p	4	ppa004145m|PACid:17648954[]~~ppa026152m|PACid:17662938[]~~ppa016026m|PACid:17667011[]~~ppa016026m|PACid:17667011[]
LC-m0034_3p	1	ppa026908m|PACid:17656743[]
LC-m0035_3p	1	ppa026908m|PACid:17656743[]
LC-m0036_5p	1	ppb015931m|PACid:17664546[]
LC-m0037_3p	1	ppa009842m|PACid:17660452[]
LC-m0038_5p	1	ppa005679m|PACid:17651251[]
LC-m0040_3p	3	ppa012437m|PACid:17648072[]~~ppa013211m|PACid:17655878[]~~ppa017834m|PACid:17641445[]
LC-m0041_3p	2	ppa004159m|PACid:17655917[]~~ppa002300m|PACid:17662624[]
LC-m0045_5p	6	ppa010376m|PACid:17643704[]~~ppa001786m|PACid:17643860[]~~ppa020979m|PACid:17651121[]~~ppa001343m|PACid:17656535[]~~ppa001405m|PACid:17645693[]~~ppa027073m|PACid:17652287[]
LC-m0046_5p	3	ppa004340m|PACid:17662620[]~~ppa005059m|PACid:17642522[]~~ppb017585m|PACid:17644389[]
LC-m0048_5p	3	ppa022516m|PACid:17658414[]~~ppa003376m|PACid:17640837[]~~ppa016593m|PACid:17643433[]
LC-m0049_3p	12	ppa005104m|PACid:17643812[]~~ppa011173m|PACid:17659923[]~~ppa000071m|PACid:17641456[]~~ppa003608m|PACid:17659190[]~~ppa001536m|PACid:17651855[]~~ppa006916m|PACid:17665064[]~~ppa025514m|PACid:17668420[]~~ppb015337m|PACid:17644827[]~~ppa003474m|PACid:17646994[]~~ppa009980m|PACid:17667059[]~~ppa013385m|PACid:17658910[]~~ppa016222m|PACid:17640567[]
LC-m0050_5p	6	ppa015104m|PACid:17640678[]~~ppa018378m|PACid:17647994[]~~ppa020993m|PACid:17641341[]~~ppa027225m|PACid:17654029[]~~ppa1027210m|PACid:17642559[]~~ppa006059m|PACid:17651430[]
LC-m0053_3p	3	ppa002101m|PACid:17645127[]~~ppa009101m|PACid:17662077[]~~ppa009248m|PACid:17656684[]
LC-m0054_5p	1	ppa015442m|PACid:17641271[]
LC-m0057_3p	1	ppb013742m|PACid:17654509[]
LC-m0059_3p	1	ppb022735m|PACid:17643329[]
LC-m0060_5p	1	ppa010552m|PACid:17664768[]
LC-m0061_3p	1	ppa002329m|PACid:17656919[]
LC-m0062_3p	5	ppa003756m|PACid:17666833[]~~ppa015529m|PACid:17659782[]~~ppa005180m|PACid:17662721[]~~ppa014843m|PACid:17652815[]~~ppa025376m|PACid:17653751[]
LC-m0063_5p	2	ppa019548m|PACid:17643327[]~~ppa008486m|PACid:17655794[]
LC-m0064_5p	4	ppa019765m|PACid:17655115[]~~ppa000948m|PACid:17648147[]~~ppa023304m|PACid:17651862[]~~ppa019730m|PACid:17660625[]
LC-m0065_5p	25	ppa000803m|PACid:17664526[]~~ppa002810m|PACid:17642073[]~~ppa006750m|PACid:17646981[]~~ppa009067m|PACid:17657150[]~~ppb021076m|PACid:17663468[]~~ppa000214m|PACid:17648084[]~~ppa007415m|PACid:17654704[]~~ppa009756m|PACid:17654705[]~~ppa023697m|PACid:17643709[]~~ppa003721m|PACid:17643121[]~~ppa006644m|PACid:17643700[]~~ppa012379m|PACid:17665012[]~~ppa013829m|PACid:17659972[]~~ppa022250m|PACid:17645…
LC-m0066_5p	12	ppa004555m|PACid:17659130[]~~ppa006321m|PACid:17668096[]~~ppa003551m|PACid:17665334[]~~ppa008114m|PACid:17649251[]~~ppa013309m|PACid:17640825[]~~ppa001219m|PACid:17653174[]~~ppa001992m|PACid:17652882[]~~ppa011379m|PACid:17660395[]~~ppa027075m|PACid:17648114[]~~ppa015133m|PACid:17667614[]~~ppa004195m|PACid:17648978[]~~ppa008922m|PACid:17647856[]
LC-m0067_3p	2	ppa006419m|PACid:17640862[]~~ppa008982m|PACid:17649966[]
LC-m0069_5p	1	ppa000741m|PACid:17655652[]
LC-m0070_3p	3	ppa005527m|PACid:17644520[]~~ppa000631m|PACid:17666658[]~~ppa015605m|PACid:17640433[]
LC-m0073_3p	1	ppa026908m|PACid:17656743[]
LC-m0074_5p	4	ppa000467m|PACid:17661235[]~~ppa005027m|PACid:17666820[]~~ppa005528m|PACid:17666821[]~~ppa014014m|PACid:17668554[]
LC-m0075_5p	1	ppa000724m|PACid:17668572[]
LC-m0076_3p	1	ppa000435m|PACid:17668087[]
LC-m0079_5p	5	ppa003136m|PACid:17643333[]~~ppa002082m|PACid:17645207[]~~ppa002195m|PACid:17653376[]~~ppa002691m|PACid:17640912[]~~ppa002710m|PACid:17657536[]
LC-m0080_5p	3	ppa008065m|PACid:17662475[]~~ppa011476m|PACid:17641245[]~~ppa012173m|PACid:17666161[]
LC-m0081_3p	6	ppa009397m|PACid:17656533[]~~ppa015730m|PACid:17660744[]~~ppa003154m|PACid:17650304[]~~ppa004613m|PACid:17651940[]~~ppa024435m|PACid:17650881[]~~ppa025234m|PACid:17662545[]
LC-m0082_3p	5	ppa002027m|PACid:17648996[]~~ppa000091m|PACid:17646118[]~~ppa018599m|PACid:17641633[]~~ppa003439m|PACid:17668154[]~~ppa004992m|PACid:17644515[]
LC-m0085_3p	1	ppa013948m|PACid:17647007[]
LC-m0087_3p	6	ppa009397m|PACid:17656533[]~~ppa015730m|PACid:17660744[]~~ppa003154m|PACid:17650304[]~~ppa004613m|PACid:17651940[]~~ppa024435m|PACid:17650881[]~~ppa025234m|PACid:17662545[]
LC-m0088_3p	6	ppa009397m|PACid:17656533[]~~ppa015730m|PACid:17660744[]~~ppa003154m|PACid:17650304[]~~ppa004613m|PACid:17651940[]~~ppa024435m|PACid:17650881[]~~ppa025234m|PACid:17662545[]
LC-m0089_3p	6	ppa009397m|PACid:17656533[]~~ppa015730m|PACid:17660744[]~~ppa003154m|PACid:17650304[]~~ppa004613m|PACid:17651940[]~~ppa024435m|PACid:17650881[]~~ppa025234m|PACid:17662545[]
LC-m0090_5p	1	ppa003070m|PACid:17669114[]
LC-m0093_3p	5	ppa001212m|PACid:17660869[]~~ppa016635m|PACid:17652588[]~~ppa021194m|PACid:17667322[]~~ppa023373m|PACid:17660545[]~~ppa026312m|PACid:17665093[]
LC-m0094_3p	5	ppa004392m|PACid:17642635[]~~ppa014531m|PACid:17665679[]~~ppa013844m|PACid:17652884[]~~ppa013846m|PACid:17644151[]~~ppa013847m|PACid:17655039[]
LC-m0096_3p	29	ppa015762m|PACid:17660226[]~~ppa016482m|PACid:17643319[]~~ppa020740m|PACid:17647985[]~~ppa017041m|PACid:17667310[]~~ppa024045m|PACid:17656398[]~~ppa022876m|PACid:17647411[]~~ppa001212m|PACid:17660869[]~~ppa019630m|PACid:17663538[]~~ppa000373m|PACid:17640939[]~~ppa001409m|PACid:17643330[]~~ppa001594m|PACid:17658510[]~~ppa022498m|PACid:17650031[]~~ppa000335m|PACid:17645193[]~~ppa000343m|PACid:17655…
LC-m0097_3p	2	ppa021452m|PACid:17656933[]~~ppa026232m|PACid:17657921[]
LC-m0101_3p	3	ppa012437m|PACid:17648072[]~~ppa013211m|PACid:17655878[]~~ppa017834m|PACid:17641445[]
LC-m0103_5p	3	ppa008065m|PACid:17662475[]~~ppa011476m|PACid:17641245[]~~ppa012173m|PACid:17666161[]
LC-m0104_5p	3	ppa008065m|PACid:17662475[]~~ppa011476m|PACid:17641245[]~~ppa012173m|PACid:17666161[]
LC-m0105_3p	6	ppa009397m|PACid:17656533[]~~ppa015730m|PACid:17660744[]~~ppa003154m|PACid:17650304[]~~ppa004613m|PACid:17651940[]~~ppa024435m|PACid:17650881[]~~ppa025234m|PACid:17662545[]
LC-m0106_3p	6	ppa009397m|PACid:17656533[]~~ppa015730m|PACid:17660744[]~~ppa003154m|PACid:17650304[]~~ppa004613m|PACid:17651940[]~~ppa024435m|PACid:17650881[]~~ppa025234m|PACid:17662545[]
LC-m0107_3p	6	ppa009397m|PACid:17656533[]~~ppa015730m|PACid:17660744[]~~ppa003154m|PACid:17650304[]~~ppa004613m|PACid:17651940[]~~ppa024435m|PACid:17650881[]~~ppa025234m|PACid:17662545[]
LC-m0108_3p	6	ppa009397m|PACid:17656533[]~~ppa015730m|PACid:17660744[]~~ppa003154m|PACid:17650304[]~~ppa004613m|PACid:17651940[]~~ppa024435m|PACid:17650881[]~~ppa025234m|PACid:17662545[]
LC-m0109_5p	13	ppa000737m|PACid:17643055[]~~ppa019571m|PACid:17641801[]~~ppa022950m|PACid:17643627[]~~ppa022635m|PACid:17649018[]~~ppa013442m|PACid:17662880[]~~ppa001875m|PACid:17643801[]~~ppa005803m|PACid:17655267[]~~ppa010858m|PACid:17663734[]~~ppa017079m|PACid:17664635[]~~ppa002291m|PACid:17659234[]~~ppa016927m|PACid:17662967[]~~ppa021476m|PACid:17640334[]~~ppa026252m|PACid:17641872[]
LC-m0110_3p	6	ppa009397m|PACid:17656533[]~~ppa015730m|PACid:17660744[]~~ppa003154m|PACid:17650304[]~~ppa004613m|PACid:17651940[]~~ppa024435m|PACid:17650881[]~~ppa025234m|PACid:17662545[]
LC-m0111_3p	5	ppa001212m|PACid:17660869[]~~ppa016635m|PACid:17652588[]~~ppa021194m|PACid:17667322[]~~ppa023373m|PACid:17660545[]~~ppa026312m|PACid:17665093[]
LC-m0112_3p	5	ppa001212m|PACid:17660869[]~~ppa016635m|PACid:17652588[]~~ppa021194m|PACid:17667322[]~~ppa023373m|PACid:17660545[]~~ppa026312m|PACid:17665093[]
LC-m0113_3p	5	ppa001212m|PACid:17660869[]~~ppa016635m|PACid:17652588[]~~ppa021194m|PACid:17667322[]~~ppa023373m|PACid:17660545[]~~ppa026312m|PACid:17665093[]
LC-m0116_3p	1	ppa014500m|PACid:17642168[]
LC-m0117_5p	2	ppa008953m|PACid:17642768[]~~ppa008961m|PACid:17642769[]
LC-m0118_3p	3	ppa012437m|PACid:17648072[]~~ppa013211m|PACid:17655878[]~~ppa017834m|PACid:17641445[]
LC-m0119_3p	3	ppa012437m|PACid:17648072[]~~ppa013211m|PACid:17655878[]~~ppa017834m|PACid:17641445[]
LC-m0120_5p	2	ppa006634m|PACid:17655522[]~~ppa012173m|PACid:17666161[]
LC-m0124_3p	1	ppa000741m|PACid:17655652[]
LC-m0125_5p	3	ppa024028m|PACid:17654040[]~~ppa002274m|PACid:17657034[]~~ppa014536m|PACid:17653015[]
LC-m0126_3p	7	ppa007128m|PACid:17666929[]~~ppa008085m|PACid:17652272[]~~ppa004550m|PACid:17669027[]~~ppa004566m|PACid:17653878[]~~ppa006338m|PACid:17664200[]~~ppa000722m|PACid:17667848[]~~ppa003400m|PACid:17663891[]
LC-m0127_5p	2	ppa024629m|PACid:17668642[]~~ppa005654m|PACid:17666699[]
LC-m0128_3p	65	ppa014587m|PACid:17641540[]~~ppa020623m|PACid:17651934[]~~ppa022771m|PACid:17650003[]~~ppa026507m|PACid:17653364[]~~ppb014210m|PACid:17664401[]~~ppb017176m|PACid:17651467[]~~ppb019068m|PACid:17648759[]~~ppa023855m|PACid:17650025[]~~ppb018548m|PACid:17662293[]~~ppa015947m|PACid:17653208[]~~ppa021487m|PACid:17643942[]~~ppa026093m|PACid:17646107[]~~ppb014096m|PACid:17643665[]~~ppa013254m|PACid:17657…
LC-m0132_3p	2	ppa002972m|PACid:17646056[]~~ppa001516m|PACid:17664660[]
LC-m0133_5p	3	ppa010859m|PACid:17659595[]~~ppa000989m|PACid:17666677[]~~ppa020208m|PACid:17663974[]
LC-m0134_5p	10	ppa001403m|PACid:17659115[]~~ppa010869m|PACid:17667318[]~~ppa009373m|PACid:17646651[]~~ppa009739m|PACid:17668202[]~~ppa010431m|PACid:17642779[]~~ppa010673m|PACid:17642781[]~~ppa012640m|PACid:17658347[]~~ppa004017m|PACid:17664566[]~~ppa004274m|PACid:17644347[]~~ppa006072m|PACid:17650194[]
LC-m0135_5p	1	ppa000629m|PACid:17642887[]
LC-m0136_5p	1	ppa001814m|PACid:17663846[]
LC-m0138_5p	6	ppa024062m|PACid:17664782[]~~ppa006634m|PACid:17655522[]~~ppa006028m|PACid:17665799[]~~ppa007941m|PACid:17649823[]~~ppa007606m|PACid:17656532[]~~ppa012173m|PACid:17666161[]
LC-m0139_5p	6	ppa024062m|PACid:17664782[]~~ppa006634m|PACid:17655522[]~~ppa006028m|PACid:17665799[]~~ppa007941m|PACid:17649823[]~~ppa007606m|PACid:17656532[]~~ppa012173m|PACid:17666161[]
LC-m0141_5p	1	ppa009842m|PACid:17660452[]
LC-m0142_5p	3	ppa008125m|PACid:17667148[]~~ppa015598m|PACid:17663758[]~~ppa011381m|PACid:17652622[]
LC-m0143_3p	3	ppa012437m|PACid:17648072[]~~ppa013211m|PACid:17655878[]~~ppa017834m|PACid:17641445[]
LC-m0146_3p	2	ppa019632m|PACid:17640866[]~~ppa020794m|PACid:17652172[]
LC-m0147_3p	1	ppa008024m|PACid:17645464[]
LC-m0148_5p	1	ppa026191m|PACid:17668961[]
LC-m0149_3p	4	ppa021727m|PACid:17663572[]~~ppa004969m|PACid:17656312[]~~ppa005014m|PACid:17656313[]~~ppa017840m|PACid:17641870[]
LC-m0153_5p	4	ppa019765m|PACid:17655115[]~~ppa000948m|PACid:17648147[]~~ppa023304m|PACid:17651862[]~~ppa019730m|PACid:17660625[]
LC-m0154_3p	3	ppa012437m|PACid:17648072[]~~ppa013211m|PACid:17655878[]~~ppa017834m|PACid:17641445[]
LC-m0155_3p	2	ppa004938m|PACid:17658526[]~~ppa025698m|PACid:17645634[]
LC-m0156_5p	3	ppa011021m|PACid:17654829[]~~ppa010097m|PACid:17651822[]~~ppa014146m|PACid:17663427[]
LC-m0157_3p	2	ppa021493m|PACid:17668336[]~~ppa017870m|PACid:17640563[]
LC-m0158_5p	1	ppa001650m|PACid:17647929[]
LC-m0160_3p	1	ppa009870m|PACid:17645209[]
LC-m0162_5p	1	ppa020357m|PACid:17648100[]
LC-m0163_3p	3	ppa012437m|PACid:17648072[]~~ppa013211m|PACid:17655878[]~~ppa017834m|PACid:17641445[]
LC-m0164_5p	2	ppa017509m|PACid:17665338[]~~ppa015339m|PACid:17640911[]
LC-m0167_5p	2	ppa008267m|PACid:17665304[]~~ppa010515m|PACid:17660684[]
LC-m0169_3p	5	ppa017564m|PACid:17641914[]~~ppa016382m|PACid:17659484[]~~ppa002972m|PACid:17646056[]~~ppa006802m|PACid:17647012[]~~ppa018572m|PACid:17664583[]
LC-m0171_5p	5	ppa004948m|PACid:17655084[]~~ppa003330m|PACid:17657252[]~~ppa005577m|PACid:17668333[]~~ppa022919m|PACid:17667672[]~~ppa024357m|PACid:17651827[]
LC-m0174_3p	4	ppa004606m|PACid:17644135[]~~ppa013121m|PACid:17667304[]~~ppa008256m|PACid:17646048[]~~ppa026132m|PACid:17653598[]
LC-m0175_3p	2	ppa007789m|PACid:17655365[]~~ppa013948m|PACid:17647007[]
LC-m0178_5p	1	ppa005350m|PACid:17648711[]
LC-m0179_5p	6	ppa004555m|PACid:17659130[]~~ppa009206m|PACid:17649542[]~~ppa015728m|PACid:17645680[]~~ppa027076m|PACid:17662055[]~~ppa010922m|PACid:17662256[]~~ppa011379m|PACid:17660395[]
LC-m0180_5p	3	ppa010859m|PACid:17659595[]~~ppa000989m|PACid:17666677[]~~ppa020208m|PACid:17663974[]
LC-m0184_3p	1	ppb021687m|PACid:17668726[]
LC-m0186_3p	1	ppa001713m|PACid:17660695[]
LC-m0187_5p	2	ppb011961m|PACid:17651632[]~~ppb017568m|PACid:17646531[]
LC-m0188_5p	4	ppa000179m|PACid:17644104[]~~ppa006191m|PACid:17642458[]~~ppa012447m|PACid:17644707[]~~ppa011041m|PACid:17641823[]
LC-m0190_5p	9	ppa005292m|PACid:17644702[]~~ppa016483m|PACid:17666789[]~~ppa021894m|PACid:17657719[]~~ppa026357m|PACid:17667481[]~~ppa020306m|PACid:17664644[]~~ppa002419m|PACid:17648707[]~~ppa022399m|PACid:17660737[]~~ppa022491m|PACid:17646842[]~~ppa007095m|PACid:17661356[]
LC-m0192_3p	6	ppa006178m|PACid:17664518[]~~ppa000381m|PACid:17662998[]~~ppa002613m|PACid:17663187[]~~ppa021895m|PACid:17641301[]~~ppa018123m|PACid:17662571[]~~ppa000764m|PACid:17659688[]
LC-m0193_3p	29	ppb018673m|PACid:17647370[]~~ppb021409m|PACid:17652785[]~~ppb022394m|PACid:17647722[]~~ppb022544m|PACid:17665743[]~~ppb024323m|PACid:17653461[]~~ppb021600m|PACid:17668119[]~~ppb024318m|PACid:17648686[]~~ppb017412m|PACid:17640676[]~~ppa016060m|PACid:17659289[]~~ppa1027157m|PACid:17641247[]~~ppb013196m|PACid:17651102[]~~ppb013537m|PACid:17649200[]~~ppb022870m|PACid:17665785[]~~ppa014952m|PACid:1764…
LC-m0194_5p	1	ppa015442m|PACid:17641271[]
LC-m0195_3p	4	ppa004509m|PACid:17665164[]~~ppa005551m|PACid:17652978[]~~ppa000528m|PACid:17645169[]~~ppa020911m|PACid:17648402[]
LC-m0196_5p	3	ppa002937m|PACid:17655080[]~~ppa004430m|PACid:17665888[]~~ppa004953m|PACid:17664627[]
LC-m0199_3p	2	ppa022751m|PACid:17648683[]~~ppa026315m|PACid:17655195[]
LC-m0200_3p	2	ppa001561m|PACid:17644415[]~~ppa001781m|PACid:17656366[]
LC-m0202_5p	5	ppa006611m|PACid:17652940[]~~ppa005013m|PACid:17666606[]~~ppa023657m|PACid:17664777[]~~ppa012607m|PACid:17657139[]~~ppa007202m|PACid:17643160[]
LC-m0206_3p	1	ppa026829m|PACid:17661161[]
LC-m0209_3p	4	ppa001691m|PACid:17659392[]~~ppa013510m|PACid:17655432[]~~ppa001438m|PACid:17657946[]~~ppa006735m|PACid:17659083[]
LC-m0210_3p	1	ppa001579m|PACid:17640596[]
LC-m0211_3p	3	ppa000744m|PACid:17664052[]~~ppa022892m|PACid:17648668[]~~ppa006021m|PACid:17653686[]
LC-m0212_3p	1	ppa000018m|PACid:17656339[]
LC-m0213_5p	4	ppa021666m|PACid:17662125[]~~ppa026109m|PACid:17641749[]~~ppa018003m|PACid:17645817[]~~ppa025571m|PACid:17647512[]
LC-m0216_3p	1	ppa019958m|PACid:17668746[]
LC-m0217_5p	1	ppa020230m|PACid:17658184[]
LC-m0219_3p	1	ppb013742m|PACid:17654509[]
LC-m0221_3p	2	ppa007438m|PACid:17642770[]~~ppa027060m|PACid:17651214[]
LC-m0224_5p	2	ppa000324m|PACid:17645666[]~~ppa006150m|PACid:17647779[]
LC-m0225_5p	5	ppa010628m|PACid:17641224[]~~ppa010641m|PACid:17641225[]~~ppa010636m|PACid:17664500[]~~ppa011126m|PACid:17664501[]~~ppa017657m|PACid:17662992[]
LC-m0226_5p	4	ppa000179m|PACid:17644104[]~~ppa006191m|PACid:17642458[]~~ppa012447m|PACid:17644707[]~~ppa011041m|PACid:17641823[]
LC-m0227_3p	6	ppa018403m|PACid:17659731[]~~ppa019010m|PACid:17665726[]~~ppa022846m|PACid:17669047[]~~ppa005785m|PACid:17659456[]~~ppa018347m|PACid:17662672[]~~ppa024171m|PACid:17666060[]
LC-m0228_3p	1	ppa007909m|PACid:17657836[]
LC-m0229_3p	2	ppa019544m|PACid:17652710[]~~ppa013226m|PACid:17665098[]
LC-m0230_5p	4	ppa022872m|PACid:17642091[]~~ppa015207m|PACid:17665401[]~~ppa022211m|PACid:17642136[]~~ppa004326m|PACid:17665938[]
LC-m0231_3p	3	ppa012437m|PACid:17648072[]~~ppa013211m|PACid:17655878[]~~ppa017834m|PACid:17641445[]
LC-m0232_3p	3	ppa026934m|PACid:17647065[]~~ppa004580m|PACid:17662582[]~~ppa005889m|PACid:17658604[]
LC-m0233_3p	3	ppa012437m|PACid:17648072[]~~ppa013211m|PACid:17655878[]~~ppa017834m|PACid:17641445[]
Total	672

## Sheet: LS Target
miRNA Identity	Number of the Target	Target Identity
LS-m0003_3p	1	ppa023552m|PACid:17667755[]
LS-m0004_5p	2	ppa014945m|PACid:17647390[]~~ppa017445m|PACid:17664329[]
LS-m0005_3p	4	ppa012594m|PACid:17663215[]~~ppa003074m|PACid:17651829[]~~ppa004781m|PACid:17662693[]~~ppa015790m|PACid:17656910[]
LS-m0007_3p	1	ppa004515m|PACid:17652373[]
LS-m0008_3p	1	ppa014776m|PACid:17654130[]
LS-m0014_3p	2	ppa006634m|PACid:17655522[]~~ppa012173m|PACid:17666161[]
LS-m0016_5p	10	ppa017541m|PACid:17646881[]~~ppa015910m|PACid:17667547[]~~ppa006894m|PACid:17659692[]~~ppa013258m|PACid:17651150[]~~ppa020409m|PACid:17648249[]~~ppa004219m|PACid:17642166[]~~ppb024620m|PACid:17661629[]~~ppa000218m|PACid:17654152[]~~ppa011071m|PACid:17669311[]~~ppa000560m|PACid:17662031[]
LS-m0018_3p	41	ppa015313m|PACid:17653536[]~~ppa025931m|PACid:17641814[]~~ppa017433m|PACid:17649403[]~~ppa022023m|PACid:17662758[]~~ppa026003m|PACid:17641205[]~~ppb014730m|PACid:17641227[]~~ppa020719m|PACid:17658044[]~~ppa000953m|PACid:17660995[]~~ppa026111m|PACid:17662995[]~~ppa019385m|PACid:17654769[]~~ppa001090m|PACid:17658188[]~~ppa016819m|PACid:17665151[]~~ppa021718m|PACid:17647832[]~~ppa014763m|PACid:17662…
LS-m0019_5p	4	ppa003578m|PACid:17653567[]~~ppa000538m|PACid:17651196[]~~ppa013273m|PACid:17658595[]~~ppa017059m|PACid:17649718[]
LS-m0020_3p	1	ppa015660m|PACid:17657187[]
LS-m0022_3p	1	ppa012829m|PACid:17654037[]
LS-m0023_3p	1	ppa000083m|PACid:17652147[]
LS-m0025_3p	7	ppa008110m|PACid:17661760[]~~ppa026953m|PACid:17651806[]~~ppa000336m|PACid:17647225[]~~ppa000669m|PACid:17647226[]~~ppa001937m|PACid:17640390[]~~ppa009527m|PACid:17650700[]~~ppb020688m|PACid:17648469[]
LS-m0027_3p	6	ppa009397m|PACid:17656533[]~~ppa015730m|PACid:17660744[]~~ppa003154m|PACid:17650304[]~~ppa004613m|PACid:17651940[]~~ppa024435m|PACid:17650881[]~~ppa025234m|PACid:17662545[]
LS-m0028_5p	1	ppa005679m|PACid:17651251[]
LS-m0029_3p	1	ppa014776m|PACid:17654130[]
LS-m0033_3p	1	ppa026316m|PACid:17666307[]
LS-m0034_5p	1	ppa006193m|PACid:17654543[]
LS-m0035_5p	7	ppa016935m|PACid:17647108[]~~ppa003697m|PACid:17643450[]~~ppa008363m|PACid:17664684[]~~ppa026501m|PACid:17665908[]~~ppa000022m|PACid:17668739[]~~ppa000023m|PACid:17668740[]~~ppa000024m|PACid:17668741[]
LS-m0036_5p	1	ppb023941m|PACid:17664379[]
LS-m0037_5p	1	ppa005679m|PACid:17651251[]
LS-m0039_3p	3	ppa012437m|PACid:17648072[]~~ppa013211m|PACid:17655878[]~~ppa017834m|PACid:17641445[]
LS-m0040_3p	2	ppa004159m|PACid:17655917[]~~ppa002300m|PACid:17662624[]
LS-m0041_3p	3	ppa006863m|PACid:17648415[]~~ppa010829m|PACid:17646670[]~~ppa025198m|PACid:17655776[]
LS-m0044_3p	12	ppa005104m|PACid:17643812[]~~ppa011173m|PACid:17659923[]~~ppa000071m|PACid:17641456[]~~ppa003608m|PACid:17659190[]~~ppa001536m|PACid:17651855[]~~ppa006916m|PACid:17665064[]~~ppa025514m|PACid:17668420[]~~ppb015337m|PACid:17644827[]~~ppa003474m|PACid:17646994[]~~ppa009980m|PACid:17667059[]~~ppa013385m|PACid:17658910[]~~ppa016222m|PACid:17640567[]
LS-m0048_5p	6	ppa015104m|PACid:17640678[]~~ppa018378m|PACid:17647994[]~~ppa020993m|PACid:17641341[]~~ppa027225m|PACid:17654029[]~~ppa1027210m|PACid:17642559[]~~ppa006059m|PACid:17651430[]
LS-m0050_3p	2	ppa002642m|PACid:17651285[]~~ppa004616m|PACid:17667056[]
LS-m0051_3p	2	ppa019632m|PACid:17640866[]~~ppa020794m|PACid:17652172[]
LS-m0052_5p	1	ppb024333m|PACid:17653323[]
LS-m0053_3p	1	ppa022857m|PACid:17648526[]
LS-m0055_3p	1	ppb013742m|PACid:17654509[]
LS-m0058_5p	1	ppa010552m|PACid:17664768[]
LS-m0059_3p	1	ppa002329m|PACid:17656919[]
LS-m0060_3p	2	ppa005248m|PACid:17642251[]~~ppa021467m|PACid:17667661[]
LS-m0061_5p	4	ppa019765m|PACid:17655115[]~~ppa000948m|PACid:17648147[]~~ppa023304m|PACid:17651862[]~~ppa019730m|PACid:17660625[]
LS-m0062_5p	15	ppa003686m|PACid:17661262[]~~ppa006750m|PACid:17646981[]~~ppa009067m|PACid:17657150[]~~ppa000214m|PACid:17648084[]~~ppa013829m|PACid:17659972[]~~ppa022250m|PACid:17645438[]~~ppa025975m|PACid:17648761[]~~ppa013907m|PACid:17662133[]~~ppa014009m|PACid:17662134[]~~ppa014013m|PACid:17662135[]~~ppa002642m|PACid:17651285[]~~ppa012082m|PACid:17651108[]~~ppa025000m|PACid:17649586[]~~ppa013901m|PACid:17653…
LS-m0064_5p	2	ppa012426m|PACid:17657501[]~~ppa008959m|PACid:17652151[]
LS-m0066_3p	2	ppa006419m|PACid:17640862[]~~ppa008982m|PACid:17649966[]
LS-m0067_5p	1	ppa001976m|PACid:17650566[]
LS-m0068_5p	6	ppa000591m|PACid:17643219[]~~ppa000343m|PACid:17655980[]~~ppa000391m|PACid:17667187[]~~ppa019071m|PACid:17651510[]~~ppa023899m|PACid:17647794[]~~ppa026310m|PACid:17662333[]
LS-m0070_5p	6	ppa000591m|PACid:17643219[]~~ppa000343m|PACid:17655980[]~~ppa000391m|PACid:17667187[]~~ppa019071m|PACid:17651510[]~~ppa023899m|PACid:17647794[]~~ppa026310m|PACid:17662333[]
LS-m0071_5p	6	ppa000591m|PACid:17643219[]~~ppa000343m|PACid:17655980[]~~ppa000391m|PACid:17667187[]~~ppa019071m|PACid:17651510[]~~ppa023899m|PACid:17647794[]~~ppa026310m|PACid:17662333[]
LS-m0072_5p	6	ppa000591m|PACid:17643219[]~~ppa000343m|PACid:17655980[]~~ppa000391m|PACid:17667187[]~~ppa019071m|PACid:17651510[]~~ppa023899m|PACid:17647794[]~~ppa026310m|PACid:17662333[]
LS-m0073_5p	1	ppa004946m|PACid:17653371[]
LS-m0074_5p	1	ppb023941m|PACid:17664379[]
LS-m0078_5p	1	ppb015759m|PACid:17664298[]
LS-m0079_5p	3	ppa002506m|PACid:17662244[]~~ppa002882m|PACid:17662245[]~~ppa012167m|PACid:17649254[]
LS-m0080_5p	3	ppa001691m|PACid:17659392[]~~ppa007812m|PACid:17662041[]~~ppa000202m|PACid:17669145[]
LS-m0083_5p	4	ppa000467m|PACid:17661235[]~~ppa005027m|PACid:17666820[]~~ppa005528m|PACid:17666821[]~~ppa014014m|PACid:17668554[]
LS-m0084_3p	1	ppa026316m|PACid:17666307[]
LS-m0086_3p	7	ppa022271m|PACid:17661072[]~~ppa014636m|PACid:17666781[]~~ppa015797m|PACid:17651411[]~~ppa016869m|PACid:17664015[]~~ppa018600m|PACid:17667693[]~~ppa026113m|PACid:17648199[]~~ppa026594m|PACid:17665820[]
LS-m0087_3p	7	ppa022271m|PACid:17661072[]~~ppa014636m|PACid:17666781[]~~ppa015797m|PACid:17651411[]~~ppa016869m|PACid:17664015[]~~ppa018600m|PACid:17667693[]~~ppa026113m|PACid:17648199[]~~ppa026594m|PACid:17665820[]
LS-m0088_3p	1	ppa016087m|PACid:17645514[]
LS-m0090_5p	5	ppa003136m|PACid:17643333[]~~ppa002082m|PACid:17645207[]~~ppa002195m|PACid:17653376[]~~ppa002691m|PACid:17640912[]~~ppa002710m|PACid:17657536[]
LS-m0091_3p	2	ppa000868m|PACid:17657531[]~~ppa005096m|PACid:17647450[]
LS-m0092_5p	2	ppa012426m|PACid:17657501[]~~ppa008959m|PACid:17652151[]
LS-m0093_5p	3	ppa008065m|PACid:17662475[]~~ppa011476m|PACid:17641245[]~~ppa012173m|PACid:17666161[]
LS-m0094_3p	6	ppa009397m|PACid:17656533[]~~ppa015730m|PACid:17660744[]~~ppa003154m|PACid:17650304[]~~ppa004613m|PACid:17651940[]~~ppa024435m|PACid:17650881[]~~ppa025234m|PACid:17662545[]
LS-m0096_3p	6	ppa009397m|PACid:17656533[]~~ppa015730m|PACid:17660744[]~~ppa003154m|PACid:17650304[]~~ppa004613m|PACid:17651940[]~~ppa024435m|PACid:17650881[]~~ppa025234m|PACid:17662545[]
LS-m0097_3p	10	ppa000884m|PACid:17650408[]~~ppa004780m|PACid:17645927[]~~ppa005234m|PACid:17651481[]~~ppa008203m|PACid:17667763[]~~ppa008279m|PACid:17667764[]~~ppa000011m|PACid:17653665[]~~ppa004529m|PACid:17668351[]~~ppa014894m|PACid:17648368[]~~ppa000438m|PACid:17649984[]~~ppa003822m|PACid:17647745[]
LS-m0098_3p	6	ppa009397m|PACid:17656533[]~~ppa015730m|PACid:17660744[]~~ppa003154m|PACid:17650304[]~~ppa004613m|PACid:17651940[]~~ppa024435m|PACid:17650881[]~~ppa025234m|PACid:17662545[]
LS-m0099_3p	6	ppa009397m|PACid:17656533[]~~ppa015730m|PACid:17660744[]~~ppa003154m|PACid:17650304[]~~ppa004613m|PACid:17651940[]~~ppa024435m|PACid:17650881[]~~ppa025234m|PACid:17662545[]
LS-m0100_3p	2	ppa000247m|PACid:17669219[]~~ppa000274m|PACid:17648933[]
LS-m0101_3p	2	ppa000247m|PACid:17669219[]~~ppa000274m|PACid:17648933[]
LS-m0102_3p	2	ppa000247m|PACid:17669219[]~~ppa000274m|PACid:17648933[]
LS-m0103_5p	1	ppa005915m|PACid:17643346[]
LS-m0104_5p	2	ppa009570m|PACid:17662533[]~~ppa011036m|PACid:17657406[]
LS-m0106_3p	3	ppa012437m|PACid:17648072[]~~ppa013211m|PACid:17655878[]~~ppa017834m|PACid:17641445[]
LS-m0108_5p	2	ppa008953m|PACid:17642768[]~~ppa008961m|PACid:17642769[]
LS-m0109_5p	3	ppa008065m|PACid:17662475[]~~ppa011476m|PACid:17641245[]~~ppa012173m|PACid:17666161[]
LS-m0110_5p	3	ppa008065m|PACid:17662475[]~~ppa011476m|PACid:17641245[]~~ppa012173m|PACid:17666161[]
LS-m0111_3p	6	ppa009397m|PACid:17656533[]~~ppa015730m|PACid:17660744[]~~ppa003154m|PACid:17650304[]~~ppa004613m|PACid:17651940[]~~ppa024435m|PACid:17650881[]~~ppa025234m|PACid:17662545[]
LS-m0112_3p	6	ppa009397m|PACid:17656533[]~~ppa015730m|PACid:17660744[]~~ppa003154m|PACid:17650304[]~~ppa004613m|PACid:17651940[]~~ppa024435m|PACid:17650881[]~~ppa025234m|PACid:17662545[]
LS-m0113_3p	6	ppa009397m|PACid:17656533[]~~ppa015730m|PACid:17660744[]~~ppa003154m|PACid:17650304[]~~ppa004613m|PACid:17651940[]~~ppa024435m|PACid:17650881[]~~ppa025234m|PACid:17662545[]
LS-m0114_3p	6	ppa009397m|PACid:17656533[]~~ppa015730m|PACid:17660744[]~~ppa003154m|PACid:17650304[]~~ppa004613m|PACid:17651940[]~~ppa024435m|PACid:17650881[]~~ppa025234m|PACid:17662545[]
LS-m0115_5p	10	ppa000884m|PACid:17650408[]~~ppa004780m|PACid:17645927[]~~ppa005234m|PACid:17651481[]~~ppa008203m|PACid:17667763[]~~ppa008279m|PACid:17667764[]~~ppa000011m|PACid:17653665[]~~ppa004529m|PACid:17668351[]~~ppa014894m|PACid:17648368[]~~ppa000438m|PACid:17649984[]~~ppa003822m|PACid:17647745[]
LS-m0116_5p	10	ppa000884m|PACid:17650408[]~~ppa004780m|PACid:17645927[]~~ppa005234m|PACid:17651481[]~~ppa008203m|PACid:17667763[]~~ppa008279m|PACid:17667764[]~~ppa000011m|PACid:17653665[]~~ppa004529m|PACid:17668351[]~~ppa014894m|PACid:17648368[]~~ppa000438m|PACid:17649984[]~~ppa003822m|PACid:17647745[]
LS-m0117_5p	7	ppa022635m|PACid:17649018[]~~ppa013442m|PACid:17662880[]~~ppa005803m|PACid:17655267[]~~ppa017079m|PACid:17664635[]~~ppa002291m|PACid:17659234[]~~ppa021476m|PACid:17640334[]~~ppa026252m|PACid:17641872[]
LS-m0118_3p	2	ppa001407m|PACid:17643515[]~~ppa017778m|PACid:17663650[]
LS-m0119_3p	6	ppa009397m|PACid:17656533[]~~ppa015730m|PACid:17660744[]~~ppa003154m|PACid:17650304[]~~ppa004613m|PACid:17651940[]~~ppa024435m|PACid:17650881[]~~ppa025234m|PACid:17662545[]
LS-m0124_3p	1	ppa014500m|PACid:17642168[]
LS-m0125_5p	2	ppa008953m|PACid:17642768[]~~ppa008961m|PACid:17642769[]
LS-m0126_3p	3	ppa012437m|PACid:17648072[]~~ppa013211m|PACid:17655878[]~~ppa017834m|PACid:17641445[]
LS-m0127_3p	3	ppa012437m|PACid:17648072[]~~ppa013211m|PACid:17655878[]~~ppa017834m|PACid:17641445[]
LS-m0128_3p	75	ppa008731m|PACid:17646504[]~~ppa010066m|PACid:17641455[]~~ppa000858m|PACid:17648618[]~~ppa000857m|PACid:17648619[]~~ppa000893m|PACid:17648620[]~~ppa006940m|PACid:17662175[]~~ppa006953m|PACid:17642034[]~~ppa007418m|PACid:17661537[]~~ppa008842m|PACid:17661100[]~~ppa009437m|PACid:17667723[]~~ppa013411m|PACid:17642089[]~~ppa019624m|PACid:17642235[]~~ppa001932m|PACid:17641355[]~~ppa006411m|PACid:17647…
LS-m0130_5p	2	ppa006634m|PACid:17655522[]~~ppa012173m|PACid:17666161[]
LS-m0132_3p	5	ppa000092m|PACid:17654523[]~~ppa004552m|PACid:17655549[]~~ppa013353m|PACid:17660967[]~~ppa024435m|PACid:17650881[]~~ppa025234m|PACid:17662545[]
LS-m0134_3p	2	ppa019670m|PACid:17649830[]~~ppa002944m|PACid:17662501[]
LS-m0135_5p	3	ppa024028m|PACid:17654040[]~~ppa002274m|PACid:17657034[]~~ppa014536m|PACid:17653015[]
LS-m0136_5p	3	ppa008065m|PACid:17662475[]~~ppa011476m|PACid:17641245[]~~ppa012173m|PACid:17666161[]
LS-m0137_3p	7	ppa007128m|PACid:17666929[]~~ppa008085m|PACid:17652272[]~~ppa004550m|PACid:17669027[]~~ppa004566m|PACid:17653878[]~~ppa006338m|PACid:17664200[]~~ppa000722m|PACid:17667848[]~~ppa003400m|PACid:17663891[]
LS-m0138_5p	5	ppa013986m|PACid:17666730[]~~ppb011730m|PACid:17654135[]~~ppa002833m|PACid:17661921[]~~ppa006028m|PACid:17665799[]~~ppa007941m|PACid:17649823[]
LS-m0139_5p	5	ppa013986m|PACid:17666730[]~~ppb011730m|PACid:17654135[]~~ppa002833m|PACid:17661921[]~~ppa006028m|PACid:17665799[]~~ppa007941m|PACid:17649823[]
LS-m0140_5p	13	ppa003028m|PACid:17650848[]~~ppa010638m|PACid:17662233[]~~ppb015844m|PACid:17664441[]~~ppa005190m|PACid:17656241[]~~ppa022977m|PACid:17651265[]~~ppa024077m|PACid:17665595[]~~ppa025083m|PACid:17664597[]~~ppa025126m|PACid:17659547[]~~ppa000885m|PACid:17642508[]~~ppa003484m|PACid:17647186[]~~ppa013343m|PACid:17640491[]~~ppa025303m|PACid:17648029[]~~ppa023426m|PACid:17652632[]
LS-m0142_5p	2	ppa014945m|PACid:17647390[]~~ppa017445m|PACid:17664329[]
LS-m0144_5p	1	ppa015011m|PACid:17647542[]
LS-m0146_3p	2	ppa002972m|PACid:17646056[]~~ppa001516m|PACid:17664660[]
LS-m0147_3p	8	ppa001073m|PACid:17644095[]~~ppa026786m|PACid:17656332[]~~ppb016836m|PACid:17656603[]~~ppa001197m|PACid:17666757[]~~ppa012026m|PACid:17647707[]~~ppa010547m|PACid:17641573[]~~ppa006032m|PACid:17652783[]~~ppa004386m|PACid:17645781[]
LS-m0148_5p	1	ppa010437m|PACid:17642031[]
LS-m0150_5p	1	ppb023941m|PACid:17664379[]
LS-m0151_3p	2	ppa001407m|PACid:17643515[]~~ppa017778m|PACid:17663650[]
LS-m0153_3p	457	ppa007570m|PACid:17661168[]~~ppa007570m|PACid:17661168[]~~ppa007570m|PACid:17661168[]~~ppa008731m|PACid:17646504[]~~ppa000535m|PACid:17656895[]~~ppa000858m|PACid:17648618[]~~ppa000857m|PACid:17648619[]~~ppa000893m|PACid:17648620[]~~ppa001125m|PACid:17655753[]~~ppa001554m|PACid:17656842[]~~ppa001983m|PACid:17666482[]~~ppa002051m|PACid:17666483[]~~ppa003124m|PACid:17646161[]~~ppa003627m|PACid:17647…
LS-m0154_5p	6	ppa024062m|PACid:17664782[]~~ppa006634m|PACid:17655522[]~~ppa006028m|PACid:17665799[]~~ppa007941m|PACid:17649823[]~~ppa007606m|PACid:17656532[]~~ppa012173m|PACid:17666161[]
LS-m0155_5p	6	ppa024062m|PACid:17664782[]~~ppa006634m|PACid:17655522[]~~ppa006028m|PACid:17665799[]~~ppa007941m|PACid:17649823[]~~ppa007606m|PACid:17656532[]~~ppa012173m|PACid:17666161[]
LS-m0157_5p	1	ppb023941m|PACid:17664379[]
LS-m0158_5p	2	ppa014945m|PACid:17647390[]~~ppa017445m|PACid:17664329[]
LS-m0159_3p	3	ppa012437m|PACid:17648072[]~~ppa013211m|PACid:17655878[]~~ppa017834m|PACid:17641445[]
LS-m0160_5p	1	ppb023941m|PACid:17664379[]
LS-m0162_3p	2	ppa019632m|PACid:17640866[]~~ppa020794m|PACid:17652172[]
LS-m0164_3p	1	ppa008024m|PACid:17645464[]
LS-m0165_3p	1	ppa026316m|PACid:17666307[]
LS-m0167_3p	1	ppa009007m|PACid:17651965[]
LS-m0169_5p	4	ppa019765m|PACid:17655115[]~~ppa000948m|PACid:17648147[]~~ppa023304m|PACid:17651862[]~~ppa019730m|PACid:17660625[]
LS-m0170_3p	3	ppa012437m|PACid:17648072[]~~ppa013211m|PACid:17655878[]~~ppa017834m|PACid:17641445[]
LS-m0171_3p	1	ppa016087m|PACid:17645514[]
LS-m0172_3p	1	ppa026109m|PACid:17641749[]
LS-m0173_5p	72	ppa001151m|PACid:17646932[]~~ppa002158m|PACid:17659601[]~~ppa005104m|PACid:17643812[]~~ppa007128m|PACid:17666929[]~~ppa011451m|PACid:17643154[]~~ppa011620m|PACid:17654503[]~~ppa012132m|PACid:17641795[]~~ppa013695m|PACid:17667198[]~~ppa024988m|PACid:17647111[]~~ppa003130m|PACid:17667767[]~~ppa004138m|PACid:17667768[]~~ppa004345m|PACid:17667769[]~~ppa003147m|PACid:17645622[]~~ppa003416m|PACid:17663…
LS-m0174_3p	2	ppa004938m|PACid:17658526[]~~ppa025698m|PACid:17645634[]
LS-m0175_5p	3	ppa011021m|PACid:17654829[]~~ppa010097m|PACid:17651822[]~~ppa014146m|PACid:17663427[]
LS-m0176_3p	2	ppa021493m|PACid:17668336[]~~ppa017870m|PACid:17640563[]
LS-m0177_5p	1	ppa001650m|PACid:17647929[]
LS-m0178_3p	12	ppa001138m|PACid:17667049[]~~ppa001252m|PACid:17645289[]~~ppa012461m|PACid:17656862[]~~ppa004837m|PACid:17662867[]~~ppa006150m|PACid:17647779[]~~ppa010345m|PACid:17657971[]~~ppa010943m|PACid:17665544[]~~ppa018356m|PACid:17645160[]~~ppa005437m|PACid:17656870[]~~ppa011351m|PACid:17660254[]~~ppa002777m|PACid:17645418[]~~ppa010772m|PACid:17659901[]
LS-m0180_3p	1	ppa009870m|PACid:17645209[]
LS-m0181_5p	1	ppa020357m|PACid:17648100[]
LS-m0182_3p	1	ppa002624m|PACid:17659164[]
LS-m0183_3p	1	ppa002624m|PACid:17659164[]
LS-m0185_5p	2	ppa017509m|PACid:17665338[]~~ppa015339m|PACid:17640911[]
LS-m0186_5p	2	ppa008267m|PACid:17665304[]~~ppa010515m|PACid:17660684[]
LS-m0187_3p	5	ppa017564m|PACid:17641914[]~~ppa016382m|PACid:17659484[]~~ppa002972m|PACid:17646056[]~~ppa006802m|PACid:17647012[]~~ppa018572m|PACid:17664583[]
LS-m0193_3p	4	ppa004606m|PACid:17644135[]~~ppa013121m|PACid:17667304[]~~ppa008256m|PACid:17646048[]~~ppa026132m|PACid:17653598[]
LS-m0194_3p	2	ppa007789m|PACid:17655365[]~~ppa013948m|PACid:17647007[]
LS-m0199_5p	10	ppa016867m|PACid:17666337[]~~ppb023134m|PACid:17643989[]~~ppa003819m|PACid:17642888[]~~ppa007065m|PACid:17651202[]~~ppa026389m|PACid:17662196[]~~ppa1027140m|PACid:17647526[]~~ppa007557m|PACid:17665581[]~~ppa014349m|PACid:17668983[]~~ppa017151m|PACid:17650728[]~~ppa004408m|PACid:17663717[]
LS-m0200_3p	1	ppa024457m|PACid:17643662[]
LS-m0202_5p	6	ppa004555m|PACid:17659130[]~~ppa009206m|PACid:17649542[]~~ppa015728m|PACid:17645680[]~~ppa027076m|PACid:17662055[]~~ppa010922m|PACid:17662256[]~~ppa011379m|PACid:17660395[]
LS-m0203_3p	2	ppa013748m|PACid:17664415[]~~ppa014330m|PACid:17643573[]
LS-m0204_3p	10	ppa005875m|PACid:17661533[]~~ppa006909m|PACid:17657595[]~~ppa019779m|PACid:17652212[]~~ppa008197m|PACid:17647617[]~~ppa008199m|PACid:17647618[]~~ppa023271m|PACid:17642914[]~~ppa000247m|PACid:17669219[]~~ppa007082m|PACid:17661074[]~~ppa016937m|PACid:17662641[]~~ppa026844m|PACid:17666958[]
LS-m0206_3p	1	ppa014776m|PACid:17654130[]
LS-m0207_3p	75	ppa008731m|PACid:17646504[]~~ppa010066m|PACid:17641455[]~~ppa000858m|PACid:17648618[]~~ppa000857m|PACid:17648619[]~~ppa000893m|PACid:17648620[]~~ppa006940m|PACid:17662175[]~~ppa006953m|PACid:17642034[]~~ppa007418m|PACid:17661537[]~~ppa008842m|PACid:17661100[]~~ppa009437m|PACid:17667723[]~~ppa013411m|PACid:17642089[]~~ppa019624m|PACid:17642235[]~~ppa001932m|PACid:17641355[]~~ppa006411m|PACid:17647…
LS-m0208_3p	1	ppb021687m|PACid:17668726[]
LS-m0209_3p	11	ppa017159m|PACid:17667679[]~~ppa006071m|PACid:17661077[]~~ppa001663m|PACid:17646636[]~~ppa001816m|PACid:17660429[]~~ppa017634m|PACid:17651458[]~~ppa023026m|PACid:17655810[]~~ppa026218m|PACid:17664367[]~~ppa013269m|PACid:17643061[]~~ppa019202m|PACid:17648582[]~~ppa017246m|PACid:17656234[]~~ppa020370m|PACid:17654539[]
LS-m0211_5p	2	ppa014945m|PACid:17647390[]~~ppa017445m|PACid:17664329[]
LS-m0212_5p	1	ppa008713m|PACid:17656936[]
LS-m0213_3p	2	ppa013467m|PACid:17668967[]~~ppa000525m|PACid:17668208[]
LS-m0214_5p	2	ppa016480m|PACid:17669233[]~~ppa019827m|PACid:17661552[]
LS-m0218_5p	4	ppa000179m|PACid:17644104[]~~ppa006191m|PACid:17642458[]~~ppa012447m|PACid:17644707[]~~ppa011041m|PACid:17641823[]
LS-m0220_5p	1	ppa021858m|PACid:17643970[]
LS-m0222_5p	9	ppa005292m|PACid:17644702[]~~ppa016483m|PACid:17666789[]~~ppa021894m|PACid:17657719[]~~ppa026357m|PACid:17667481[]~~ppa020306m|PACid:17664644[]~~ppa002419m|PACid:17648707[]~~ppa022399m|PACid:17660737[]~~ppa022491m|PACid:17646842[]~~ppa007095m|PACid:17661356[]
LS-m0225_3p	6	ppa006178m|PACid:17664518[]~~ppa000381m|PACid:17662998[]~~ppa002613m|PACid:17663187[]~~ppa021895m|PACid:17641301[]~~ppa018123m|PACid:17662571[]~~ppa000764m|PACid:17659688[]
LS-m0226_5p	2	ppa023525m|PACid:17668989[]~~ppa021679m|PACid:17649032[]
LS-m0229_3p	2	ppa022751m|PACid:17648683[]~~ppa026315m|PACid:17655195[]
LS-m0232_5p	11	ppa021582m|PACid:17650931[]~~ppa003644m|PACid:17642692[]~~ppa006611m|PACid:17652940[]~~ppa011968m|PACid:17643943[]~~ppa005013m|PACid:17666606[]~~ppa017695m|PACid:17643485[]~~ppa023657m|PACid:17664777[]~~ppa012607m|PACid:17657139[]~~ppa007202m|PACid:17643160[]~~ppa007056m|PACid:17664418[]~~ppa024285m|PACid:17667981[]
LS-m0234_3p	2	ppa007456m|PACid:17660115[]~~ppa004605m|PACid:17659678[]
LS-m0237_5p	2	ppa014945m|PACid:17647390[]~~ppa017445m|PACid:17664329[]
LS-m0238_5p	1	ppb023941m|PACid:17664379[]
LS-m0239_5p	2	ppa014945m|PACid:17647390[]~~ppa017445m|PACid:17664329[]
LS-m0240_5p	2	ppa014945m|PACid:17647390[]~~ppa017445m|PACid:17664329[]
LS-m0243_5p	1	ppa005679m|PACid:17651251[]
LS-m0246_3p	3	ppa000744m|PACid:17664052[]~~ppa022892m|PACid:17648668[]~~ppa006021m|PACid:17653686[]
LS-m0247_3p	7	ppa004832m|PACid:17643926[]~~ppa014596m|PACid:17662779[]~~ppa019048m|PACid:17652428[]~~ppa019215m|PACid:17657563[]~~ppa022777m|PACid:17652232[]~~ppa023335m|PACid:17664453[]~~ppa026438m|PACid:17656672[]
LS-m0248_3p	1	ppa000018m|PACid:17656339[]
LS-m0250_5p	1	ppa020230m|PACid:17658184[]
LS-m0251_3p	1	ppa015686m|PACid:17654719[]
LS-m0255_5p	11	ppa000051m|PACid:17651064[]~~ppa001454m|PACid:17666454[]~~ppa006064m|PACid:17650663[]~~ppa015204m|PACid:17659447[]~~ppa000031m|PACid:17642750[]~~ppa000072m|PACid:17645847[]~~ppa000226m|PACid:17654711[]~~ppa017338m|PACid:17640854[]~~ppa021359m|PACid:17660390[]~~ppa022795m|PACid:17663394[]~~ppa026425m|PACid:17663364[]
LS-m0256_5p	5	ppa010628m|PACid:17641224[]~~ppa010641m|PACid:17641225[]~~ppa010636m|PACid:17664500[]~~ppa011126m|PACid:17664501[]~~ppa017657m|PACid:17662992[]
LS-m0257_5p	4	ppa000179m|PACid:17644104[]~~ppa006191m|PACid:17642458[]~~ppa012447m|PACid:17644707[]~~ppa011041m|PACid:17641823[]
LS-m0258_5p	1	ppa002418m|PACid:17651315[]
LS-m0259_5p	2	ppa014945m|PACid:17647390[]~~ppa017445m|PACid:17664329[]
LS-m0261_5p	4	ppa022872m|PACid:17642091[]~~ppa015207m|PACid:17665401[]~~ppa022211m|PACid:17642136[]~~ppa004326m|PACid:17665938[]
LS-m0262_3p	3	ppa026934m|PACid:17647065[]~~ppa004580m|PACid:17662582[]~~ppa005889m|PACid:17658604[]
Total	1293

## Sheet: RC Target
miRNA Identity	Number of the Target	Target Identity
RC-m0001_5p	1	ppa018782m|PACid:17666983[]
RC-m0003_3p	3	ppa012437m|PACid:17648072[]~~ppa013211m|PACid:17655878[]~~ppa017834m|PACid:17641445[]
RC-m0004_3p	1	ppa014955m|PACid:17651959[]
RC-m0006_5p	2	ppa003070m|PACid:17669114[]~~ppa003070m|PACid:17669114[]
RC-m0007_5p	2	ppa003070m|PACid:17669114[]~~ppa003070m|PACid:17669114[]
RC-m0014_3p	11	ppa001746m|PACid:17649234[]~~ppa018512m|PACid:17657784[]~~ppa020272m|PACid:17648626[]~~ppa002351m|PACid:17655395[]~~ppa027076m|PACid:17662055[]~~ppa004127m|PACid:17663486[]~~ppa015758m|PACid:17647146[]~~ppa025579m|PACid:17660725[]~~ppa007501m|PACid:17645704[]~~ppa002125m|PACid:17654107[]~~ppa026299m|PACid:17659200[]
RC-m0015_5p	1	ppa018020m|PACid:17656373[]
RC-m0016_3p	4	ppa012594m|PACid:17663215[]~~ppa003074m|PACid:17651829[]~~ppa004781m|PACid:17662693[]~~ppa015790m|PACid:17656910[]
RC-m0018_3p	3	ppa012437m|PACid:17648072[]~~ppa013211m|PACid:17655878[]~~ppa017834m|PACid:17641445[]
RC-m0022_5p	1	ppa004445m|PACid:17640690[]
RC-m0023_3p	2	ppa006634m|PACid:17655522[]~~ppa012173m|PACid:17666161[]
RC-m0024_5p	1	ppa003405m|PACid:17646705[]
RC-m0025_3p	1	ppa020705m|PACid:17652142[]
RC-m0026_5p	3	ppa013258m|PACid:17651150[]~~ppa010184m|PACid:17647274[]~~ppa003986m|PACid:17658537[]
RC-m0027_3p	22	ppb024266m|PACid:17667129[]~~ppa014805m|PACid:17654682[]~~ppa001010m|PACid:17646217[]~~ppa002873m|PACid:17646454[]~~ppa005870m|PACid:17662402[]~~ppa016819m|PACid:17665151[]~~ppa1027175m|PACid:17654226[]~~ppa016435m|PACid:17668357[]~~ppa019519m|PACid:17661868[]~~ppa025207m|PACid:17668203[]~~ppa026334m|PACid:17660376[]~~ppb000367m|PACid:17653109[]~~ppa017081m|PACid:17654789[]~~ppa000373m|PACid:1764…
RC-m0028_3p	41	ppa015313m|PACid:17653536[]~~ppa025931m|PACid:17641814[]~~ppa017433m|PACid:17649403[]~~ppa022023m|PACid:17662758[]~~ppa026003m|PACid:17641205[]~~ppb014730m|PACid:17641227[]~~ppa020719m|PACid:17658044[]~~ppa000953m|PACid:17660995[]~~ppa026111m|PACid:17662995[]~~ppa019385m|PACid:17654769[]~~ppa001090m|PACid:17658188[]~~ppa016819m|PACid:17665151[]~~ppa021718m|PACid:17647832[]~~ppa014763m|PACid:17662…
RC-m0029_5p	4	ppa003578m|PACid:17653567[]~~ppa000538m|PACid:17651196[]~~ppa013273m|PACid:17658595[]~~ppa017059m|PACid:17649718[]
RC-m0030_3p	7	ppa026152m|PACid:17662938[]~~ppa016026m|PACid:17667011[]~~ppa016026m|PACid:17667011[]~~ppa016026m|PACid:17667011[]~~ppa006789m|PACid:17662247[]~~ppa021887m|PACid:17666705[]~~ppb017944m|PACid:17640754[]
RC-m0031_3p	1	ppa015660m|PACid:17657187[]
RC-m0032_5p	3	ppa021946m|PACid:17654833[]~~ppa016052m|PACid:17662013[]~~ppa023454m|PACid:17658543[]
RC-m0033_3p	1	ppa012829m|PACid:17654037[]
RC-m0036_5p	2	ppa003070m|PACid:17669114[]~~ppa003070m|PACid:17669114[]
RC-m0038_5p	3	ppa014378m|PACid:17668275[]~~ppa003234m|PACid:17644268[]~~ppa023105m|PACid:17640814[]
RC-m0041_3p	4	ppa004145m|PACid:17648954[]~~ppa026152m|PACid:17662938[]~~ppa016026m|PACid:17667011[]~~ppa016026m|PACid:17667011[]
RC-m0042_3p	1	ppa014776m|PACid:17654130[]
RC-m0044_3p	1	ppa026856m|PACid:17654310[]
RC-m0049_3p	1	ppa026316m|PACid:17666307[]
RC-m0051_3p	1	ppa013658m|PACid:17662374[]
RC-m0052_3p	1	ppa023989m|PACid:17667692[]
RC-m0053_3p	1	ppa009842m|PACid:17660452[]
RC-m0054_5p	1	ppa005679m|PACid:17651251[]
RC-m0056_3p	3	ppa012437m|PACid:17648072[]~~ppa013211m|PACid:17655878[]~~ppa017834m|PACid:17641445[]
RC-m0058_5p	3	ppa002310m|PACid:17652002[]~~ppa008512m|PACid:17663441[]~~ppa005241m|PACid:17669321[]
RC-m0059_3p	1	ppa013658m|PACid:17662374[]
RC-m0060_3p	3	ppa006863m|PACid:17648415[]~~ppa010829m|PACid:17646670[]~~ppa025198m|PACid:17655776[]
RC-m0061_5p	2	ppa006717m|PACid:17645130[]~~ppa003164m|PACid:17642450[]
RC-m0063_3p	12	ppa005104m|PACid:17643812[]~~ppa011173m|PACid:17659923[]~~ppa000071m|PACid:17641456[]~~ppa003608m|PACid:17659190[]~~ppa001536m|PACid:17651855[]~~ppa006916m|PACid:17665064[]~~ppa025514m|PACid:17668420[]~~ppb015337m|PACid:17644827[]~~ppa003474m|PACid:17646994[]~~ppa009980m|PACid:17667059[]~~ppa013385m|PACid:17658910[]~~ppa016222m|PACid:17640567[]
RC-m0066_5p	1	ppa019704m|PACid:17642841[]
RC-m0067_3p	13	ppa000456m|PACid:17646694[]~~ppa001312m|PACid:17644921[]~~ppa019143m|PACid:17654408[]~~ppa009895m|PACid:17653842[]~~ppa023446m|PACid:17645895[]~~ppa009026m|PACid:17663418[]~~ppa023099m|PACid:17648088[]~~ppa020157m|PACid:17654796[]~~ppa002028m|PACid:17648750[]~~ppa004355m|PACid:17656844[]~~ppa004351m|PACid:17656845[]~~ppa005247m|PACid:17664589[]~~ppa003739m|PACid:17667065[]
RC-m0070_3p	2	ppa008835m|PACid:17651361[]~~ppa006469m|PACid:17660901[]
RC-m0077_5p	1	ppa010552m|PACid:17664768[]
RC-m0078_3p	1	ppa002329m|PACid:17656919[]
RC-m0079_5p	4	ppa019765m|PACid:17655115[]~~ppa000948m|PACid:17648147[]~~ppa023304m|PACid:17651862[]~~ppa019730m|PACid:17660625[]
RC-m0080_3p	12	ppa015893m|PACid:17665674[]~~ppa003722m|PACid:17641993[]~~ppa004248m|PACid:17641994[]~~ppa003820m|PACid:17662926[]~~ppa007163m|PACid:17641337[]~~ppa000969m|PACid:17642628[]~~ppa015582m|PACid:17666424[]~~ppa024160m|PACid:17659622[]~~ppb021735m|PACid:17666051[]~~ppa003497m|PACid:17647499[]~~ppa011113m|PACid:17652970[]~~ppa024348m|PACid:17663851[]
RC-m0084_3p	1	ppa008809m|PACid:17652296[]
RC-m0085_5p	1	ppa004946m|PACid:17653371[]
RC-m0087_5p	1	ppa013666m|PACid:17650371[]
RC-m0090_5p	3	ppa001691m|PACid:17659392[]~~ppa007812m|PACid:17662041[]~~ppa000202m|PACid:17669145[]
RC-m0092_3p	8	ppa015866m|PACid:17647449[]~~ppa016361m|PACid:17642134[]~~ppa003318m|PACid:17661802[]~~ppa008320m|PACid:17653469[]~~ppa026328m|PACid:17658290[]~~ppa000204m|PACid:17646646[]~~ppa001444m|PACid:17650447[]~~ppa020366m|PACid:17659413[]
RC-m0093_3p	1	ppa000435m|PACid:17668087[]
RC-m0095_3p	2	ppa007685m|PACid:17661678[]~~ppa005114m|PACid:17661492[]
RC-m0096_5p	5	ppa003136m|PACid:17643333[]~~ppa002082m|PACid:17645207[]~~ppa002195m|PACid:17653376[]~~ppa002691m|PACid:17640912[]~~ppa002710m|PACid:17657536[]
RC-m0097_5p	3	ppa008065m|PACid:17662475[]~~ppa011476m|PACid:17641245[]~~ppa012173m|PACid:17666161[]
RC-m0098_5p	10	ppa000884m|PACid:17650408[]~~ppa004780m|PACid:17645927[]~~ppa005234m|PACid:17651481[]~~ppa008203m|PACid:17667763[]~~ppa008279m|PACid:17667764[]~~ppa000011m|PACid:17653665[]~~ppa004529m|PACid:17668351[]~~ppa014894m|PACid:17648368[]~~ppa000438m|PACid:17649984[]~~ppa003822m|PACid:17647745[]
RC-m0099_3p	5	ppa002027m|PACid:17648996[]~~ppa000091m|PACid:17646118[]~~ppa018599m|PACid:17641633[]~~ppa003439m|PACid:17668154[]~~ppa004992m|PACid:17644515[]
RC-m0100_3p	10	ppa000884m|PACid:17650408[]~~ppa004780m|PACid:17645927[]~~ppa005234m|PACid:17651481[]~~ppa008203m|PACid:17667763[]~~ppa008279m|PACid:17667764[]~~ppa000011m|PACid:17653665[]~~ppa004529m|PACid:17668351[]~~ppa014894m|PACid:17648368[]~~ppa000438m|PACid:17649984[]~~ppa003822m|PACid:17647745[]
RC-m0101_5p	3	ppa009932m|PACid:17656206[]~~ppa009332m|PACid:17665631[]~~ppa020178m|PACid:17663235[]
RC-m0102_3p	29	ppa015762m|PACid:17660226[]~~ppa016482m|PACid:17643319[]~~ppa020740m|PACid:17647985[]~~ppa017041m|PACid:17667310[]~~ppa024045m|PACid:17656398[]~~ppa022876m|PACid:17647411[]~~ppa001212m|PACid:17660869[]~~ppa019630m|PACid:17663538[]~~ppa000373m|PACid:17640939[]~~ppa001409m|PACid:17643330[]~~ppa001594m|PACid:17658510[]~~ppa022498m|PACid:17650031[]~~ppa000335m|PACid:17645193[]~~ppa000343m|PACid:17655…
RC-m0103_3p	8	ppa010980m|PACid:17644257[]~~ppa002390m|PACid:17664813[]~~ppa001304m|PACid:17644262[]~~ppa003898m|PACid:17666325[]~~ppa021398m|PACid:17661065[]~~ppa006426m|PACid:17668810[]~~ppa019020m|PACid:17644780[]~~ppa020320m|PACid:17657109[]
RC-m0105_3p	5	ppa001561m|PACid:17644415[]~~ppa016845m|PACid:17663724[]~~ppa000996m|PACid:17657769[]~~ppa001824m|PACid:17642564[]~~ppa001781m|PACid:17656366[]
RC-m0106_3p	3	ppa012437m|PACid:17648072[]~~ppa013211m|PACid:17655878[]~~ppa017834m|PACid:17641445[]
RC-m0108_5p	2	ppa008953m|PACid:17642768[]~~ppa008961m|PACid:17642769[]
RC-m0109_5p	3	ppa008065m|PACid:17662475[]~~ppa011476m|PACid:17641245[]~~ppa012173m|PACid:17666161[]
RC-m0110_5p	3	ppa008065m|PACid:17662475[]~~ppa011476m|PACid:17641245[]~~ppa012173m|PACid:17666161[]
RC-m0111_5p	10	ppa000884m|PACid:17650408[]~~ppa004780m|PACid:17645927[]~~ppa005234m|PACid:17651481[]~~ppa008203m|PACid:17667763[]~~ppa008279m|PACid:17667764[]~~ppa000011m|PACid:17653665[]~~ppa004529m|PACid:17668351[]~~ppa014894m|PACid:17648368[]~~ppa000438m|PACid:17649984[]~~ppa003822m|PACid:17647745[]
RC-m0112_5p	10	ppa000884m|PACid:17650408[]~~ppa004780m|PACid:17645927[]~~ppa005234m|PACid:17651481[]~~ppa008203m|PACid:17667763[]~~ppa008279m|PACid:17667764[]~~ppa000011m|PACid:17653665[]~~ppa004529m|PACid:17668351[]~~ppa014894m|PACid:17648368[]~~ppa000438m|PACid:17649984[]~~ppa003822m|PACid:17647745[]
RC-m0113_5p	10	ppa000884m|PACid:17650408[]~~ppa004780m|PACid:17645927[]~~ppa005234m|PACid:17651481[]~~ppa008203m|PACid:17667763[]~~ppa008279m|PACid:17667764[]~~ppa000011m|PACid:17653665[]~~ppa004529m|PACid:17668351[]~~ppa014894m|PACid:17648368[]~~ppa000438m|PACid:17649984[]~~ppa003822m|PACid:17647745[]
RC-m0114_5p	10	ppa000884m|PACid:17650408[]~~ppa004780m|PACid:17645927[]~~ppa005234m|PACid:17651481[]~~ppa008203m|PACid:17667763[]~~ppa008279m|PACid:17667764[]~~ppa000011m|PACid:17653665[]~~ppa004529m|PACid:17668351[]~~ppa014894m|PACid:17648368[]~~ppa000438m|PACid:17649984[]~~ppa003822m|PACid:17647745[]
RC-m0117_5p	10	ppa000884m|PACid:17650408[]~~ppa004780m|PACid:17645927[]~~ppa005234m|PACid:17651481[]~~ppa008203m|PACid:17667763[]~~ppa008279m|PACid:17667764[]~~ppa000011m|PACid:17653665[]~~ppa004529m|PACid:17668351[]~~ppa014894m|PACid:17648368[]~~ppa000438m|PACid:17649984[]~~ppa003822m|PACid:17647745[]
RC-m0118_5p	12	ppa005975m|PACid:17652402[]~~ppa020226m|PACid:17651044[]~~ppa025037m|PACid:17668760[]~~ppa018370m|PACid:17648184[]~~ppa025373m|PACid:17646745[]~~ppa008637m|PACid:17654844[]~~ppa005139m|PACid:17657949[]~~ppa006966m|PACid:17645483[]~~ppa026830m|PACid:17650983[]~~ppa003327m|PACid:17640929[]~~ppa005009m|PACid:17660562[]~~ppa021891m|PACid:17641082[]
RC-m0123_3p	1	ppa015742m|PACid:17655181[]
RC-m0124_3p	1	ppa014500m|PACid:17642168[]
RC-m0126_5p	2	ppa008953m|PACid:17642768[]~~ppa008961m|PACid:17642769[]
RC-m0127_3p	3	ppa012437m|PACid:17648072[]~~ppa013211m|PACid:17655878[]~~ppa017834m|PACid:17641445[]
RC-m0128_3p	3	ppa012437m|PACid:17648072[]~~ppa013211m|PACid:17655878[]~~ppa017834m|PACid:17641445[]
RC-m0131_5p	2	ppa006634m|PACid:17655522[]~~ppa012173m|PACid:17666161[]
RC-m0132_5p	1	ppa017338m|PACid:17640854[]
RC-m0133_3p	5	ppa001561m|PACid:17644415[]~~ppa016845m|PACid:17663724[]~~ppa000996m|PACid:17657769[]~~ppa001824m|PACid:17642564[]~~ppa001781m|PACid:17656366[]
RC-m0135_3p	5	ppa000092m|PACid:17654523[]~~ppa004552m|PACid:17655549[]~~ppa013353m|PACid:17660967[]~~ppa024435m|PACid:17650881[]~~ppa025234m|PACid:17662545[]
RC-m0136_5p	2	ppa002870m|PACid:17648451[]~~ppa009144m|PACid:17658837[]
RC-m0137_5p	5	ppa003136m|PACid:17643333[]~~ppa002082m|PACid:17645207[]~~ppa002195m|PACid:17653376[]~~ppa002691m|PACid:17640912[]~~ppa002710m|PACid:17657536[]
RC-m0139_3p	2	ppa019670m|PACid:17649830[]~~ppa002944m|PACid:17662501[]
RC-m0141_5p	3	ppa008065m|PACid:17662475[]~~ppa011476m|PACid:17641245[]~~ppa012173m|PACid:17666161[]
RC-m0144_3p	1	ppa020036m|PACid:17655625[]
RC-m0145_3p	7	ppa007128m|PACid:17666929[]~~ppa008085m|PACid:17652272[]~~ppa004550m|PACid:17669027[]~~ppa004566m|PACid:17653878[]~~ppa006338m|PACid:17664200[]~~ppa000722m|PACid:17667848[]~~ppa003400m|PACid:17663891[]
RC-m0147_5p	5	ppa013986m|PACid:17666730[]~~ppb011730m|PACid:17654135[]~~ppa002833m|PACid:17661921[]~~ppa006028m|PACid:17665799[]~~ppa007941m|PACid:17649823[]
RC-m0148_5p	5	ppa013986m|PACid:17666730[]~~ppb011730m|PACid:17654135[]~~ppa002833m|PACid:17661921[]~~ppa006028m|PACid:17665799[]~~ppa007941m|PACid:17649823[]
RC-m0149_3p	10	ppa000212m|PACid:17648698[]~~ppa000360m|PACid:17662996[]~~ppa004955m|PACid:17653696[]~~ppa006335m|PACid:17653697[]~~ppa017683m|PACid:17665155[]~~ppa000116m|PACid:17640347[]~~ppa004282m|PACid:17643684[]~~ppa000885m|PACid:17642508[]~~ppa003484m|PACid:17647186[]~~ppa023426m|PACid:17652632[]
RC-m0151_5p	1	ppa022342m|PACid:17645405[]
RC-m0153_3p	1	ppa019633m|PACid:17655045[]
RC-m0155_3p	4	ppa006497m|PACid:17641133[]~~ppa007291m|PACid:17642778[]~~ppa019415m|PACid:17651801[]~~ppa022381m|PACid:17646171[]
RC-m0156_3p	2	ppa002972m|PACid:17646056[]~~ppa001516m|PACid:17664660[]
RC-m0157_3p	4	ppa005388m|PACid:17661234[]~~ppa011163m|PACid:17668494[]~~ppa004176m|PACid:17640993[]~~ppa025234m|PACid:17662545[]
RC-m0159_5p	5	ppa002073m|PACid:17648639[]~~ppa013487m|PACid:17654318[]~~ppa007515m|PACid:17647280[]~~ppa007589m|PACid:17647281[]~~ppa025042m|PACid:17665897[]
RC-m0161_3p	8	ppa001073m|PACid:17644095[]~~ppa026786m|PACid:17656332[]~~ppb016836m|PACid:17656603[]~~ppa001197m|PACid:17666757[]~~ppa012026m|PACid:17647707[]~~ppa010547m|PACid:17641573[]~~ppa006032m|PACid:17652783[]~~ppa004386m|PACid:17645781[]
RC-m0162_3p	1	ppa019694m|PACid:17643533[]
RC-m0165_5p	6	ppa024062m|PACid:17664782[]~~ppa006634m|PACid:17655522[]~~ppa006028m|PACid:17665799[]~~ppa007941m|PACid:17649823[]~~ppa007606m|PACid:17656532[]~~ppa012173m|PACid:17666161[]
RC-m0166_5p	6	ppa024062m|PACid:17664782[]~~ppa006634m|PACid:17655522[]~~ppa006028m|PACid:17665799[]~~ppa007941m|PACid:17649823[]~~ppa007606m|PACid:17656532[]~~ppa012173m|PACid:17666161[]
RC-m0168_3p	1	ppa014776m|PACid:17654130[]
RC-m0169_5p	1	ppa009842m|PACid:17660452[]
RC-m0172_3p	3	ppa012437m|PACid:17648072[]~~ppa013211m|PACid:17655878[]~~ppa017834m|PACid:17641445[]
RC-m0173_3p	2	ppa007787m|PACid:17652905[]~~ppa017497m|PACid:17660485[]
RC-m0175_3p	4	ppa006497m|PACid:17641133[]~~ppa007291m|PACid:17642778[]~~ppa019415m|PACid:17651801[]~~ppa022381m|PACid:17646171[]
RC-m0177_5p	5	ppa016829m|PACid:17664950[]~~ppa017269m|PACid:17666564[]~~ppa021384m|PACid:17665826[]~~ppa022712m|PACid:17657756[]~~ppa014481m|PACid:17660552[]
RC-m0179_5p	1	ppa026108m|PACid:17664638[]
RC-m0180_3p	2	ppa019632m|PACid:17640866[]~~ppa020794m|PACid:17652172[]
RC-m0182_3p	1	ppa008024m|PACid:17645464[]
RC-m0183_3p	1	ppa026316m|PACid:17666307[]
RC-m0187_5p	4	ppa019765m|PACid:17655115[]~~ppa000948m|PACid:17648147[]~~ppa023304m|PACid:17651862[]~~ppa019730m|PACid:17660625[]
RC-m0189_3p	1	ppa016087m|PACid:17645514[]
RC-m0190_5p	9	ppa000953m|PACid:17660995[]~~ppa015762m|PACid:17660226[]~~ppa019283m|PACid:17665029[]~~ppa020740m|PACid:17647985[]~~ppa001591m|PACid:17644685[]~~ppa003609m|PACid:17657199[]~~ppa001015m|PACid:17660055[]~~ppa009010m|PACid:17650974[]~~ppa015920m|PACid:17642956[]
RC-m0192_5p	1	ppa000554m|PACid:17661238[]
RC-m0193_3p	3	ppa012437m|PACid:17648072[]~~ppa013211m|PACid:17655878[]~~ppa017834m|PACid:17641445[]
RC-m0194_3p	2	ppa004938m|PACid:17658526[]~~ppa025698m|PACid:17645634[]
RC-m0195_5p	3	ppa011021m|PACid:17654829[]~~ppa010097m|PACid:17651822[]~~ppa014146m|PACid:17663427[]
RC-m0196_3p	12	ppa001138m|PACid:17667049[]~~ppa001252m|PACid:17645289[]~~ppa012461m|PACid:17656862[]~~ppa004837m|PACid:17662867[]~~ppa006150m|PACid:17647779[]~~ppa010345m|PACid:17657971[]~~ppa010943m|PACid:17665544[]~~ppa018356m|PACid:17645160[]~~ppa005437m|PACid:17656870[]~~ppa011351m|PACid:17660254[]~~ppa002777m|PACid:17645418[]~~ppa010772m|PACid:17659901[]
RC-m0198_5p	1	ppa020357m|PACid:17648100[]
RC-m0199_3p	3	ppa012437m|PACid:17648072[]~~ppa013211m|PACid:17655878[]~~ppa017834m|PACid:17641445[]
RC-m0200_5p	2	ppa017509m|PACid:17665338[]~~ppa015339m|PACid:17640911[]
RC-m0202_5p	2	ppa008267m|PACid:17665304[]~~ppa010515m|PACid:17660684[]
RC-m0206_3p	1	ppa001333m|PACid:17643676[]
RC-m0207_5p	443	ppa007570m|PACid:17661168[]~~ppa007570m|PACid:17661168[]~~ppa008731m|PACid:17646504[]~~ppa000535m|PACid:17656895[]~~ppa000858m|PACid:17648618[]~~ppa000858m|PACid:17648618[]~~ppa000857m|PACid:17648619[]~~ppa000857m|PACid:17648619[]~~ppa000893m|PACid:17648620[]~~ppa000893m|PACid:17648620[]~~ppa001125m|PACid:17655753[]~~ppa001554m|PACid:17656842[]~~ppa001983m|PACid:17666482[]~~ppa002051m|PACid:17666…
RC-m0209_5p	1	ppa013914m|PACid:17667182[]
RC-m0210_5p	10	ppa016867m|PACid:17666337[]~~ppb023134m|PACid:17643989[]~~ppa003819m|PACid:17642888[]~~ppa007065m|PACid:17651202[]~~ppa026389m|PACid:17662196[]~~ppa1027140m|PACid:17647526[]~~ppa007557m|PACid:17665581[]~~ppa014349m|PACid:17668983[]~~ppa017151m|PACid:17650728[]~~ppa004408m|PACid:17663717[]
RC-m0211_5p	6	ppa004555m|PACid:17659130[]~~ppa009206m|PACid:17649542[]~~ppa015728m|PACid:17645680[]~~ppa027076m|PACid:17662055[]~~ppa010922m|PACid:17662256[]~~ppa011379m|PACid:17660395[]
RC-m0212_3p	2	ppa008254m|PACid:17659883[]~~ppa009427m|PACid:17652805[]
RC-m0213_3p	1	ppa014776m|PACid:17654130[]
RC-m0214_3p	75	ppa008731m|PACid:17646504[]~~ppa010066m|PACid:17641455[]~~ppa000858m|PACid:17648618[]~~ppa000857m|PACid:17648619[]~~ppa000893m|PACid:17648620[]~~ppa006940m|PACid:17662175[]~~ppa006953m|PACid:17642034[]~~ppa007418m|PACid:17661537[]~~ppa008842m|PACid:17661100[]~~ppa009437m|PACid:17667723[]~~ppa013411m|PACid:17642089[]~~ppa019624m|PACid:17642235[]~~ppa001932m|PACid:17641355[]~~ppa006411m|PACid:17647…
RC-m0216_3p	1	ppa1027176m|PACid:17659011[]
RC-m0218_3p	2	ppa013467m|PACid:17668967[]~~ppa000525m|PACid:17668208[]
RC-m0219_5p	16	ppa005578m|PACid:17651880[]~~ppa007777m|PACid:17654710[]~~ppa010270m|PACid:17663381[]~~ppa009848m|PACid:17652661[]~~ppa026134m|PACid:17666373[]~~ppa000443m|PACid:17643908[]~~ppa007900m|PACid:17655851[]~~ppa014144m|PACid:17663893[]~~ppa020168m|PACid:17667657[]~~ppa006580m|PACid:17652604[]~~ppa007051m|PACid:17644511[]~~ppa016997m|PACid:17658265[]~~ppa025826m|PACid:17650419[]~~ppa006922m|PACid:17655…
RC-m0220_3p	3	ppa007580m|PACid:17667121[]~~ppa016817m|PACid:17652115[]~~ppb023670m|PACid:17659850[]
RC-m0221_3p	6	ppa020940m|PACid:17646000[]~~ppa026684m|PACid:17657855[]~~ppa010928m|PACid:17656430[]~~ppa001625m|PACid:17652165[]~~ppa008351m|PACid:17650363[]~~ppa024626m|PACid:17661098[]
RC-m0222_5p	3	ppa002310m|PACid:17652002[]~~ppa008512m|PACid:17663441[]~~ppa005241m|PACid:17669321[]
RC-m0223_5p	4	ppa000179m|PACid:17644104[]~~ppa006191m|PACid:17642458[]~~ppa012447m|PACid:17644707[]~~ppa011041m|PACid:17641823[]
RC-m0224_5p	1	ppa019704m|PACid:17642841[]
RC-m0225_3p	1	ppa021991m|PACid:17644039[]
RC-m0226_5p	1	ppb017081m|PACid:17648252[]
RC-m0228_5p	1	ppa003975m|PACid:17663329[]
RC-m0230_3p	2	ppa014066m|PACid:17654133[]~~ppa008422m|PACid:17655438[]
RC-m0231_3p	2	ppa007456m|PACid:17660115[]~~ppa004605m|PACid:17659678[]
RC-m0234_3p	4	ppa010901m|PACid:17643795[]~~ppa009639m|PACid:17650220[]~~ppa012109m|PACid:17658346[]~~ppa013902m|PACid:17659975[]
RC-m0235_3p	5	ppa005012m|PACid:17666843[]~~ppa002269m|PACid:17642550[]~~ppa020949m|PACid:17664681[]~~ppa017221m|PACid:17646833[]~~ppa026489m|PACid:17656330[]
RC-m0236_3p	9	ppa017433m|PACid:17649403[]~~ppa020601m|PACid:17641486[]~~ppa022023m|PACid:17662758[]~~ppa023459m|PACid:17658556[]~~ppa024258m|PACid:17642919[]~~ppa026003m|PACid:17641205[]~~ppa023828m|PACid:17649287[]~~ppa000891m|PACid:17640995[]~~ppa000524m|PACid:17665156[]
RC-m0237_3p	1	ppa000668m|PACid:17663609[]
RC-m0238_3p	3	ppa000744m|PACid:17664052[]~~ppa022892m|PACid:17648668[]~~ppa006021m|PACid:17653686[]
RC-m0239_5p	9	ppa004340m|PACid:17662620[]~~ppa017355m|PACid:17663192[]~~ppa020408m|PACid:17653914[]~~ppa022178m|PACid:17659589[]~~ppa001294m|PACid:17668631[]~~ppa022685m|PACid:17663137[]~~ppa003589m|PACid:17647660[]~~ppa005426m|PACid:17660617[]~~ppa014816m|PACid:17644361[]
RC-m0242_3p	1	ppa023989m|PACid:17667692[]
RC-m0243_3p	1	ppa007216m|PACid:17668167[]
RC-m0245_3p	1	ppa019374m|PACid:17653863[]
RC-m0246_5p	2	ppa016286m|PACid:17651122[]~~ppa018837m|PACid:17649395[]
RC-m0247_3p	1	ppa026316m|PACid:17666307[]
RC-m0248_3p	1	ppa020384m|PACid:17665095[]
RC-m0252_5p	3	ppa000324m|PACid:17645666[]~~ppa006150m|PACid:17647779[]~~ppa012075m|PACid:17661699[]
RC-m0253_5p	5	ppa010628m|PACid:17641224[]~~ppa010641m|PACid:17641225[]~~ppa010636m|PACid:17664500[]~~ppa011126m|PACid:17664501[]~~ppa017657m|PACid:17662992[]
RC-m0254_5p	4	ppa000179m|PACid:17644104[]~~ppa006191m|PACid:17642458[]~~ppa012447m|PACid:17644707[]~~ppa011041m|PACid:17641823[]
RC-m0255_3p	1	ppa002418m|PACid:17651315[]
RC-m0256_5p	13	ppa019539m|PACid:17669296[]~~ppa022396m|PACid:17668322[]~~ppa023784m|PACid:17669139[]~~ppa016752m|PACid:17644489[]~~ppa1027221m|PACid:17661006[]~~ppa007884m|PACid:17642231[]~~ppa012007m|PACid:17668646[]~~ppa012009m|PACid:17668647[]~~ppa015845m|PACid:17661838[]~~ppa005477m|PACid:17650303[]~~ppa013038m|PACid:17663291[]~~ppa005231m|PACid:17653761[]~~ppb019226m|PACid:17660811[]
RC-m0258_5p	9	ppa001929m|PACid:17667125[]~~ppa001383m|PACid:17656113[]~~ppa003223m|PACid:17667618[]~~ppa004419m|PACid:17667619[]~~ppa004901m|PACid:17666877[]~~ppa004910m|PACid:17660794[]~~ppa005937m|PACid:17656111[]~~ppa026558m|PACid:17659467[]~~ppa027023m|PACid:17664163[]
RC-m0260_5p	4	ppa022872m|PACid:17642091[]~~ppa015207m|PACid:17665401[]~~ppa022211m|PACid:17642136[]~~ppa004326m|PACid:17665938[]
RC-m0262_3p	3	ppa012437m|PACid:17648072[]~~ppa013211m|PACid:17655878[]~~ppa017834m|PACid:17641445[]
RC-m0263_3p	3	ppa026934m|PACid:17647065[]~~ppa004580m|PACid:17662582[]~~ppa005889m|PACid:17658604[]
RC-m0264_3p	3	ppa012437m|PACid:17648072[]~~ppa013211m|PACid:17655878[]~~ppa017834m|PACid:17641445[]
RC-m0265_5p	2	ppa003070m|PACid:17669114[]~~ppa003070m|PACid:17669114[]
RC-m0267_3p	2	ppa009624m|PACid:17668408[]~~ppa015176m|PACid:17656011[]
Total	1194

## Sheet: RS Target
miRNA Identity	Number of the Target	Target Identity
RS-m0001_5p	2	ppa000035m|PACid:17664886[]~~ppa017316m|PACid:17642285[]
RS-m0002_5p	2	ppa004796m|PACid:17666972[]~~ppa011621m|PACid:17668661[]
RS-m0003_5p	2	ppa013929m|PACid:17658907[]~~ppa013866m|PACid:17648439[]
RS-m0006_3p	3	ppa012437m|PACid:17648072[]~~ppa013211m|PACid:17655878[]~~ppa017834m|PACid:17641445[]
RS-m0007_3p	1	ppa004411m|PACid:17652599[]
RS-m0008_5p	1	ppa005161m|PACid:17666503[]
RS-m0009_3p	1	ppa011495m|PACid:17642428[]
RS-m0011_3p	4	ppa004756m|PACid:17645083[]~~ppa018569m|PACid:17650869[]~~ppa001259m|PACid:17646475[]~~ppa005435m|PACid:17665310[]
RS-m0012_3p	2	ppa001920m|PACid:17668714[]~~ppa010801m|PACid:17664619[]
RS-m0013_3p	3	ppa012437m|PACid:17648072[]~~ppa013211m|PACid:17655878[]~~ppa017834m|PACid:17641445[]
RS-m0015_3p	1	ppa024553m|PACid:17643674[]
RS-m0019_3p	2	ppa023111m|PACid:17652239[]~~ppa018429m|PACid:17668179[]
RS-m0022_3p	2	ppa006634m|PACid:17655522[]~~ppa012173m|PACid:17666161[]
RS-m0024_3p	41	ppa015313m|PACid:17653536[]~~ppa025931m|PACid:17641814[]~~ppa017433m|PACid:17649403[]~~ppa022023m|PACid:17662758[]~~ppa026003m|PACid:17641205[]~~ppb014730m|PACid:17641227[]~~ppa020719m|PACid:17658044[]~~ppa000953m|PACid:17660995[]~~ppa026111m|PACid:17662995[]~~ppa019385m|PACid:17654769[]~~ppa001090m|PACid:17658188[]~~ppa016819m|PACid:17665151[]~~ppa021718m|PACid:17647832[]~~ppa014763m|PACid:17662…
RS-m0025_5p	5	ppa002346m|PACid:17643844[]~~ppa002699m|PACid:17664841[]~~ppa001790m|PACid:17658763[]~~ppa001519m|PACid:17650319[]~~ppa013273m|PACid:17658595[]
RS-m0026_3p	1	ppa015660m|PACid:17657187[]
RS-m0027_3p	5	ppa001561m|PACid:17644415[]~~ppa016845m|PACid:17663724[]~~ppa000996m|PACid:17657769[]~~ppa001824m|PACid:17642564[]~~ppa001781m|PACid:17656366[]
RS-m0030_3p	1	ppa006437m|PACid:17658745[]
RS-m0032_3p	6	ppa009397m|PACid:17656533[]~~ppa015730m|PACid:17660744[]~~ppa003154m|PACid:17650304[]~~ppa004613m|PACid:17651940[]~~ppa024435m|PACid:17650881[]~~ppa025234m|PACid:17662545[]
RS-m0034_5p	1	ppa005679m|PACid:17651251[]
RS-m0037_5p	1	ppa013732m|PACid:17656380[]
RS-m0039_5p	1	ppa016173m|PACid:17645324[]
RS-m0041_3p	8	ppa020061m|PACid:17664797[]~~ppa021337m|PACid:17641303[]~~ppa010825m|PACid:17651360[]~~ppa000766m|PACid:17648310[]~~ppa004523m|PACid:17669375[]~~ppa016271m|PACid:17652691[]~~ppa005268m|PACid:17655371[]~~ppa006697m|PACid:17664528[]
RS-m0043_5p	7	ppa016935m|PACid:17647108[]~~ppa003697m|PACid:17643450[]~~ppa008363m|PACid:17664684[]~~ppa026501m|PACid:17665908[]~~ppa000022m|PACid:17668739[]~~ppa000023m|PACid:17668740[]~~ppa000024m|PACid:17668741[]
RS-m0045_3p	1	ppa009842m|PACid:17660452[]
RS-m0046_5p	1	ppa005679m|PACid:17651251[]
RS-m0047_3p	3	ppa012437m|PACid:17648072[]~~ppa013211m|PACid:17655878[]~~ppa017834m|PACid:17641445[]
RS-m0048_3p	2	ppa004159m|PACid:17655917[]~~ppa002300m|PACid:17662624[]
RS-m0049_5p	4	ppa005027m|PACid:17666820[]~~ppa005528m|PACid:17666821[]~~ppa014014m|PACid:17668554[]~~ppa012075m|PACid:17661699[]
RS-m0050_5p	3	ppa010376m|PACid:17643704[]~~ppa020979m|PACid:17651121[]~~ppa001405m|PACid:17645693[]
RS-m0051_5p	2	ppa002919m|PACid:17666357[]~~ppa022768m|PACid:17663062[]
RS-m0055_5p	3	ppa022516m|PACid:17658414[]~~ppa003376m|PACid:17640837[]~~ppa016593m|PACid:17643433[]
RS-m0056_3p	12	ppa005104m|PACid:17643812[]~~ppa011173m|PACid:17659923[]~~ppa000071m|PACid:17641456[]~~ppa003608m|PACid:17659190[]~~ppa001536m|PACid:17651855[]~~ppa006916m|PACid:17665064[]~~ppa025514m|PACid:17668420[]~~ppb015337m|PACid:17644827[]~~ppa003474m|PACid:17646994[]~~ppa009980m|PACid:17667059[]~~ppa013385m|PACid:17658910[]~~ppa016222m|PACid:17640567[]
RS-m0058_5p	1	ppa019704m|PACid:17642841[]
RS-m0062_3p	13	ppa000456m|PACid:17646694[]~~ppa001312m|PACid:17644921[]~~ppa019143m|PACid:17654408[]~~ppa009895m|PACid:17653842[]~~ppa023446m|PACid:17645895[]~~ppa009026m|PACid:17663418[]~~ppa023099m|PACid:17648088[]~~ppa020157m|PACid:17654796[]~~ppa002028m|PACid:17648750[]~~ppa004355m|PACid:17656844[]~~ppa004351m|PACid:17656845[]~~ppa005247m|PACid:17664589[]~~ppa003739m|PACid:17667065[]
RS-m0065_3p	4	ppa004570m|PACid:17651907[]~~ppa018811m|PACid:17658697[]~~ppa021930m|PACid:17661084[]~~ppa009555m|PACid:17655429[]
RS-m0067_5p	1	ppa014826m|PACid:17646041[]
RS-m0068_3p	1	ppb022735m|PACid:17643329[]
RS-m0069_5p	1	ppa026498m|PACid:17666618[]
RS-m0072_5p	1	ppa010552m|PACid:17664768[]
RS-m0074_5p	2	ppa019548m|PACid:17643327[]~~ppa008486m|PACid:17655794[]
RS-m0075_5p	4	ppa019765m|PACid:17655115[]~~ppa000948m|PACid:17648147[]~~ppa023304m|PACid:17651862[]~~ppa019730m|PACid:17660625[]
RS-m0077_3p	11	ppa018677m|PACid:17665862[]~~ppa003291m|PACid:17643962[]~~ppa004433m|PACid:17668474[]~~ppa002998m|PACid:17665007[]~~ppa000604m|PACid:17650129[]~~ppa003783m|PACid:17649184[]~~ppa005230m|PACid:17666914[]~~ppa021782m|PACid:17649818[]~~ppa004886m|PACid:17641806[]~~ppa004959m|PACid:17641807[]~~ppa018704m|PACid:17643074[]
RS-m0079_3p	12	ppa015893m|PACid:17665674[]~~ppa003722m|PACid:17641993[]~~ppa004248m|PACid:17641994[]~~ppa003820m|PACid:17662926[]~~ppa007163m|PACid:17641337[]~~ppa000969m|PACid:17642628[]~~ppa015582m|PACid:17666424[]~~ppa024160m|PACid:17659622[]~~ppb021735m|PACid:17666051[]~~ppa003497m|PACid:17647499[]~~ppa011113m|PACid:17652970[]~~ppa024348m|PACid:17663851[]
RS-m0080_3p	15	ppa001997m|PACid:17648912[]~~ppa000315m|PACid:17649053[]~~ppa015389m|PACid:17653496[]~~ppa017251m|PACid:17654251[]~~ppa017311m|PACid:17656555[]~~ppa018252m|PACid:17656642[]~~ppa024135m|PACid:17643175[]~~ppa025690m|PACid:17652218[]~~ppa003783m|PACid:17649184[]~~ppa005230m|PACid:17666914[]~~ppa021782m|PACid:17649818[]~~ppa004886m|PACid:17641806[]~~ppa004959m|PACid:17641807[]~~ppa002981m|PACid:17648…
RS-m0081_5p	1	ppa018374m|PACid:17646769[]
RS-m0082_5p	1	ppa001976m|PACid:17650566[]
RS-m0083_5p	1	ppa013732m|PACid:17656380[]
RS-m0087_3p	2	ppa010899m|PACid:17651239[]~~ppa008035m|PACid:17646541[]
RS-m0088_5p	1	ppa013666m|PACid:17650371[]
RS-m0090_5p	3	ppa001691m|PACid:17659392[]~~ppa007812m|PACid:17662041[]~~ppa000202m|PACid:17669145[]
RS-m0098_3p	1	ppa016087m|PACid:17645514[]
RS-m0099_5p	5	ppa003136m|PACid:17643333[]~~ppa002082m|PACid:17645207[]~~ppa002195m|PACid:17653376[]~~ppa002691m|PACid:17640912[]~~ppa002710m|PACid:17657536[]
RS-m0100_3p	1	ppa022541m|PACid:17655560[]
RS-m0102_3p	6	ppa009397m|PACid:17656533[]~~ppa015730m|PACid:17660744[]~~ppa003154m|PACid:17650304[]~~ppa004613m|PACid:17651940[]~~ppa024435m|PACid:17650881[]~~ppa025234m|PACid:17662545[]
RS-m0103_3p	4	ppa022926m|PACid:17655137[]~~ppa005820m|PACid:17650912[]~~ppa002221m|PACid:17652467[]~~ppb022735m|PACid:17643329[]
RS-m0104_3p	6	ppa009397m|PACid:17656533[]~~ppa015730m|PACid:17660744[]~~ppa003154m|PACid:17650304[]~~ppa004613m|PACid:17651940[]~~ppa024435m|PACid:17650881[]~~ppa025234m|PACid:17662545[]
RS-m0105_3p	6	ppa009397m|PACid:17656533[]~~ppa015730m|PACid:17660744[]~~ppa003154m|PACid:17650304[]~~ppa004613m|PACid:17651940[]~~ppa024435m|PACid:17650881[]~~ppa025234m|PACid:17662545[]
RS-m0106_3p	6	ppa009397m|PACid:17656533[]~~ppa015730m|PACid:17660744[]~~ppa003154m|PACid:17650304[]~~ppa004613m|PACid:17651940[]~~ppa024435m|PACid:17650881[]~~ppa025234m|PACid:17662545[]
RS-m0108_3p	8	ppa012101m|PACid:17659111[]~~ppa022757m|PACid:17655313[]~~ppa019074m|PACid:17644563[]~~ppa017120m|PACid:17664964[]~~ppa021625m|PACid:17652528[]~~ppa001857m|PACid:17666189[]~~ppa003715m|PACid:17661111[]~~ppa026018m|PACid:17644866[]
RS-m0110_5p	1	ppa008594m|PACid:17660949[]
RS-m0111_3p	3	ppa022516m|PACid:17658414[]~~ppa003376m|PACid:17640837[]~~ppa016593m|PACid:17643433[]
RS-m0113_3p	29	ppa015762m|PACid:17660226[]~~ppa016482m|PACid:17643319[]~~ppa020740m|PACid:17647985[]~~ppa017041m|PACid:17667310[]~~ppa024045m|PACid:17656398[]~~ppa022876m|PACid:17647411[]~~ppa001212m|PACid:17660869[]~~ppa019630m|PACid:17663538[]~~ppa000373m|PACid:17640939[]~~ppa001409m|PACid:17643330[]~~ppa001594m|PACid:17658510[]~~ppa022498m|PACid:17650031[]~~ppa000335m|PACid:17645193[]~~ppa000343m|PACid:17655…
RS-m0118_3p	5	ppa001561m|PACid:17644415[]~~ppa016845m|PACid:17663724[]~~ppa000996m|PACid:17657769[]~~ppa001824m|PACid:17642564[]~~ppa001781m|PACid:17656366[]
RS-m0121_3p	2	ppa003765m|PACid:17653935[]~~ppa018689m|PACid:17649930[]
RS-m0122_3p	6	ppa009397m|PACid:17656533[]~~ppa015730m|PACid:17660744[]~~ppa003154m|PACid:17650304[]~~ppa004613m|PACid:17651940[]~~ppa024435m|PACid:17650881[]~~ppa025234m|PACid:17662545[]
RS-m0123_3p	6	ppa009397m|PACid:17656533[]~~ppa015730m|PACid:17660744[]~~ppa003154m|PACid:17650304[]~~ppa004613m|PACid:17651940[]~~ppa024435m|PACid:17650881[]~~ppa025234m|PACid:17662545[]
RS-m0124_3p	6	ppa009397m|PACid:17656533[]~~ppa015730m|PACid:17660744[]~~ppa003154m|PACid:17650304[]~~ppa004613m|PACid:17651940[]~~ppa024435m|PACid:17650881[]~~ppa025234m|PACid:17662545[]
RS-m0125_3p	6	ppa009397m|PACid:17656533[]~~ppa015730m|PACid:17660744[]~~ppa003154m|PACid:17650304[]~~ppa004613m|PACid:17651940[]~~ppa024435m|PACid:17650881[]~~ppa025234m|PACid:17662545[]
RS-m0127_5p	5	ppa012074m|PACid:17646023[]~~ppa024900m|PACid:17645133[]~~ppa026351m|PACid:17649173[]~~ppa024533m|PACid:17662788[]~~ppa014997m|PACid:17667857[]
RS-m0128_5p	7	ppa022635m|PACid:17649018[]~~ppa013442m|PACid:17662880[]~~ppa005803m|PACid:17655267[]~~ppa017079m|PACid:17664635[]~~ppa002291m|PACid:17659234[]~~ppa021476m|PACid:17640334[]~~ppa026252m|PACid:17641872[]
RS-m0129_3p	6	ppa009397m|PACid:17656533[]~~ppa015730m|PACid:17660744[]~~ppa003154m|PACid:17650304[]~~ppa004613m|PACid:17651940[]~~ppa024435m|PACid:17650881[]~~ppa025234m|PACid:17662545[]
RS-m0131_5p	12	ppa005975m|PACid:17652402[]~~ppa020226m|PACid:17651044[]~~ppa025037m|PACid:17668760[]~~ppa018370m|PACid:17648184[]~~ppa025373m|PACid:17646745[]~~ppa008637m|PACid:17654844[]~~ppa005139m|PACid:17657949[]~~ppa006966m|PACid:17645483[]~~ppa026830m|PACid:17650983[]~~ppa003327m|PACid:17640929[]~~ppa005009m|PACid:17660562[]~~ppa021891m|PACid:17641082[]
RS-m0136_3p	1	ppa014500m|PACid:17642168[]
RS-m0138_3p	1	ppb022735m|PACid:17643329[]
RS-m0139_3p	3	ppa012437m|PACid:17648072[]~~ppa013211m|PACid:17655878[]~~ppa017834m|PACid:17641445[]
RS-m0140_3p	2	ppa003765m|PACid:17653935[]~~ppa018689m|PACid:17649930[]
RS-m0141_5p	2	ppa006634m|PACid:17655522[]~~ppa012173m|PACid:17666161[]
RS-m0143_5p	2	ppa021946m|PACid:17654833[]~~ppa023454m|PACid:17658543[]
RS-m0144_3p	1	ppb011375m|PACid:17660983[]
RS-m0147_5p	3	ppa024028m|PACid:17654040[]~~ppa002274m|PACid:17657034[]~~ppa014536m|PACid:17653015[]
RS-m0148_5p	2	ppa024629m|PACid:17668642[]~~ppa005654m|PACid:17666699[]
RS-m0152_3p	1	ppa019633m|PACid:17655045[]
RS-m0154_3p	2	ppa002972m|PACid:17646056[]~~ppa001516m|PACid:17664660[]
RS-m0155_5p	2	ppa000989m|PACid:17666677[]~~ppa020208m|PACid:17663974[]
RS-m0156_5p	9	ppa011268m|PACid:17652627[]~~ppa003458m|PACid:17654369[]~~ppa004727m|PACid:17669334[]~~ppa024052m|PACid:17647465[]~~ppa000108m|PACid:17643900[]~~ppa019938m|PACid:17657226[]~~ppa002260m|PACid:17666602[]~~ppa003179m|PACid:17666603[]~~ppa003255m|PACid:17666604[]
RS-m0158_5p	5	ppa002073m|PACid:17648639[]~~ppa013487m|PACid:17654318[]~~ppa007515m|PACid:17647280[]~~ppa007589m|PACid:17647281[]~~ppa025042m|PACid:17665897[]
RS-m0160_3p	1	ppa011495m|PACid:17642428[]
RS-m0164_3p	1	ppa001231m|PACid:17666351[]
RS-m0165_5p	6	ppa024062m|PACid:17664782[]~~ppa006634m|PACid:17655522[]~~ppa006028m|PACid:17665799[]~~ppa007941m|PACid:17649823[]~~ppa007606m|PACid:17656532[]~~ppa012173m|PACid:17666161[]
RS-m0166_5p	6	ppa024062m|PACid:17664782[]~~ppa006634m|PACid:17655522[]~~ppa006028m|PACid:17665799[]~~ppa007941m|PACid:17649823[]~~ppa007606m|PACid:17656532[]~~ppa012173m|PACid:17666161[]
RS-m0167_5p	1	ppa002769m|PACid:17668075[]
RS-m0169_5p	1	ppa009842m|PACid:17660452[]
RS-m0171_3p	3	ppa019725m|PACid:17667401[]~~ppa006032m|PACid:17652783[]~~ppa016328m|PACid:17648049[]
RS-m0176_5p	5	ppa016829m|PACid:17664950[]~~ppa017269m|PACid:17666564[]~~ppa021384m|PACid:17665826[]~~ppa022712m|PACid:17657756[]~~ppa014481m|PACid:17660552[]
RS-m0177_3p	2	ppa019632m|PACid:17640866[]~~ppa020794m|PACid:17652172[]
RS-m0179_3p	1	ppa008024m|PACid:17645464[]
RS-m0183_3p	1	ppa009007m|PACid:17651965[]
RS-m0184_5p	4	ppa019765m|PACid:17655115[]~~ppa000948m|PACid:17648147[]~~ppa023304m|PACid:17651862[]~~ppa019730m|PACid:17660625[]
RS-m0185_3p	25	ppa018075m|PACid:17654578[]~~ppa004926m|PACid:17648238[]~~ppa011009m|PACid:17656967[]~~ppa001321m|PACid:17660500[]~~ppa002404m|PACid:17655146[]~~ppa010908m|PACid:17646716[]~~ppa015026m|PACid:17655443[]~~ppa001907m|PACid:17651668[]~~ppa008904m|PACid:17653203[]~~ppa009221m|PACid:17666803[]~~ppa009586m|PACid:17667818[]~~ppa012076m|PACid:17648906[]~~ppa018578m|PACid:17661242[]~~ppa022278m|PACid:17662…
RS-m0186_3p	1	ppa000705m|PACid:17663131[]
RS-m0187_3p	1	ppa020554m|PACid:17645770[]
RS-m0189_5p	1	ppa005679m|PACid:17651251[]
RS-m0190_3p	1	ppa016087m|PACid:17645514[]
RS-m0192_5p	1	ppa019738m|PACid:17661225[]
RS-m0193_5p	1	ppa022541m|PACid:17655560[]
RS-m0194_3p	3	ppa012437m|PACid:17648072[]~~ppa013211m|PACid:17655878[]~~ppa017834m|PACid:17641445[]
RS-m0197_3p	2	ppa004938m|PACid:17658526[]~~ppa025698m|PACid:17645634[]
RS-m0198_3p	2	ppa005446m|PACid:17656155[]~~ppa014810m|PACid:17668893[]
RS-m0199_5p	3	ppa011021m|PACid:17654829[]~~ppa010097m|PACid:17651822[]~~ppa014146m|PACid:17663427[]
RS-m0201_5p	1	ppa022819m|PACid:17657352[]
RS-m0202_3p	12	ppa001138m|PACid:17667049[]~~ppa001252m|PACid:17645289[]~~ppa012461m|PACid:17656862[]~~ppa004837m|PACid:17662867[]~~ppa006150m|PACid:17647779[]~~ppa010345m|PACid:17657971[]~~ppa010943m|PACid:17665544[]~~ppa018356m|PACid:17645160[]~~ppa005437m|PACid:17656870[]~~ppa011351m|PACid:17660254[]~~ppa002777m|PACid:17645418[]~~ppa010772m|PACid:17659901[]
RS-m0204_3p	1	ppa024392m|PACid:17641597[]
RS-m0205_5p	1	ppa020357m|PACid:17648100[]
RS-m0206_3p	3	ppa012437m|PACid:17648072[]~~ppa013211m|PACid:17655878[]~~ppa017834m|PACid:17641445[]
RS-m0207_5p	2	ppa017509m|PACid:17665338[]~~ppa015339m|PACid:17640911[]
RS-m0209_3p	2	ppa001920m|PACid:17668714[]~~ppa010801m|PACid:17664619[]
RS-m0212_3p	1	ppa014014m|PACid:17668554[]
RS-m0214_3p	5	ppa017564m|PACid:17641914[]~~ppa016382m|PACid:17659484[]~~ppa002972m|PACid:17646056[]~~ppa006802m|PACid:17647012[]~~ppa018572m|PACid:17664583[]
RS-m0218_5p	2	ppa017565m|PACid:17648613[]~~ppa022642m|PACid:17644825[]
RS-m0221_5p	449	ppa007570m|PACid:17661168[]~~ppa007570m|PACid:17661168[]~~ppa008731m|PACid:17646504[]~~ppa000535m|PACid:17656895[]~~ppa000858m|PACid:17648618[]~~ppa000857m|PACid:17648619[]~~ppa000893m|PACid:17648620[]~~ppa001125m|PACid:17655753[]~~ppa001554m|PACid:17656842[]~~ppa001983m|PACid:17666482[]~~ppa002051m|PACid:17666483[]~~ppa003124m|PACid:17646161[]~~ppa003627m|PACid:17647709[]~~ppa003936m|PACid:17647…
RS-m0223_5p	563	ppa007570m|PACid:17661168[]~~ppa007570m|PACid:17661168[]~~ppa007570m|PACid:17661168[]~~ppa008731m|PACid:17646504[]~~ppa000858m|PACid:17648618[]~~ppa000857m|PACid:17648619[]~~ppa000893m|PACid:17648620[]~~ppa001125m|PACid:17655753[]~~ppa001554m|PACid:17656842[]~~ppa001983m|PACid:17666482[]~~ppa002051m|PACid:17666483[]~~ppa002532m|PACid:17664396[]~~ppa003124m|PACid:17646161[]~~ppa003627m|PACid:17647…
RS-m0224_3p	1	ppa012013m|PACid:17641942[]
RS-m0225_3p	6	ppa000040m|PACid:17648325[]~~ppa004344m|PACid:17640464[]~~ppa022615m|PACid:17657937[]~~ppa016318m|PACid:17640599[]~~ppa002182m|PACid:17667604[]~~ppa011082m|PACid:17663211[]
RS-m0228_5p	2	ppa014341m|PACid:17668151[]~~ppa001677m|PACid:17647672[]
RS-m0229_5p	10	ppa016867m|PACid:17666337[]~~ppb023134m|PACid:17643989[]~~ppa003819m|PACid:17642888[]~~ppa007065m|PACid:17651202[]~~ppa026389m|PACid:17662196[]~~ppa1027140m|PACid:17647526[]~~ppa007557m|PACid:17665581[]~~ppa014349m|PACid:17668983[]~~ppa017151m|PACid:17650728[]~~ppa004408m|PACid:17663717[]
RS-m0230_3p	9	ppa001997m|PACid:17648912[]~~ppa015389m|PACid:17653496[]~~ppa017251m|PACid:17654251[]~~ppa018252m|PACid:17656642[]~~ppa024135m|PACid:17643175[]~~ppa003783m|PACid:17649184[]~~ppa005230m|PACid:17666914[]~~ppa021782m|PACid:17649818[]~~ppa018704m|PACid:17643074[]
RS-m0231_3p	11	ppa018677m|PACid:17665862[]~~ppa003291m|PACid:17643962[]~~ppa004433m|PACid:17668474[]~~ppa002998m|PACid:17665007[]~~ppa000604m|PACid:17650129[]~~ppa003783m|PACid:17649184[]~~ppa005230m|PACid:17666914[]~~ppa021782m|PACid:17649818[]~~ppa004886m|PACid:17641806[]~~ppa004959m|PACid:17641807[]~~ppa018704m|PACid:17643074[]
RS-m0232_5p	1	ppa013730m|PACid:17650463[]
RS-m0234_5p	2	ppa013929m|PACid:17658907[]~~ppa013866m|PACid:17648439[]
RS-m0235_5p	1	ppb011975m|PACid:17661350[]
RS-m0236_3p	75	ppa008731m|PACid:17646504[]~~ppa010066m|PACid:17641455[]~~ppa000858m|PACid:17648618[]~~ppa000857m|PACid:17648619[]~~ppa000893m|PACid:17648620[]~~ppa006940m|PACid:17662175[]~~ppa006953m|PACid:17642034[]~~ppa007418m|PACid:17661537[]~~ppa008842m|PACid:17661100[]~~ppa009437m|PACid:17667723[]~~ppa013411m|PACid:17642089[]~~ppa019624m|PACid:17642235[]~~ppa001932m|PACid:17641355[]~~ppa006411m|PACid:17647…
RS-m0238_3p	5	ppa000639m|PACid:17666930[]~~ppa014665m|PACid:17660005[]~~ppa000537m|PACid:17645786[]~~ppa001178m|PACid:17661525[]~~ppa009497m|PACid:17667743[]
RS-m0239_3p	1	ppa014489m|PACid:17665419[]
RS-m0240_3p	1	ppa014018m|PACid:17663762[]
RS-m0241_3p	1	ppa001713m|PACid:17660695[]
RS-m0242_5p	2	ppa013929m|PACid:17658907[]~~ppa013866m|PACid:17648439[]
RS-m0246_5p	4	ppa000179m|PACid:17644104[]~~ppa006191m|PACid:17642458[]~~ppa012447m|PACid:17644707[]~~ppa011041m|PACid:17641823[]
RS-m0249_5p	1	ppa019704m|PACid:17642841[]
RS-m0253_5p	2	ppa023525m|PACid:17668989[]~~ppa021679m|PACid:17649032[]
RS-m0255_5p	1	ppa014363m|PACid:17663923[]
RS-m0256_3p	2	ppa022751m|PACid:17648683[]~~ppa026315m|PACid:17655195[]
RS-m0257_3p	2	ppa001561m|PACid:17644415[]~~ppa001781m|PACid:17656366[]
RS-m0259_5p	1	ppa014018m|PACid:17663762[]
RS-m0261_5p	2	ppa013929m|PACid:17658907[]~~ppa013866m|PACid:17648439[]
RS-m0263_3p	2	ppa007456m|PACid:17660115[]~~ppa004605m|PACid:17659678[]
RS-m0264_3p	3	ppa025917m|PACid:17643277[]~~ppa013446m|PACid:17641915[]~~ppa014738m|PACid:17645054[]
RS-m0265_3p	1	ppa018536m|PACid:17654288[]
RS-m0266_5p	5	ppa000025m|PACid:17649489[]~~ppa000670m|PACid:17643395[]~~ppa000703m|PACid:17643396[]~~ppa017287m|PACid:17642669[]~~ppa012154m|PACid:17642904[]
RS-m0269_5p	1	ppa005679m|PACid:17651251[]
RS-m0272_3p	1	ppa000668m|PACid:17663609[]
RS-m0273_3p	3	ppa000744m|PACid:17664052[]~~ppa022892m|PACid:17648668[]~~ppa006021m|PACid:17653686[]
RS-m0275_3p	1	ppb020638m|PACid:17641802[]
RS-m0277_5p	9	ppa004340m|PACid:17662620[]~~ppa017355m|PACid:17663192[]~~ppa020408m|PACid:17653914[]~~ppa022178m|PACid:17659589[]~~ppa001294m|PACid:17668631[]~~ppa022685m|PACid:17663137[]~~ppa003589m|PACid:17647660[]~~ppa005426m|PACid:17660617[]~~ppa014816m|PACid:17644361[]
RS-m0280_5p	1	ppa020230m|PACid:17658184[]
RS-m0282_3p	1	ppa015686m|PACid:17654719[]
RS-m0285_5p	5	ppa005254m|PACid:17669228[]~~ppa025548m|PACid:17640349[]~~ppa004963m|PACid:17650112[]~~ppa002096m|PACid:17653628[]~~ppa000292m|PACid:17642001[]
RS-m0286_3p	2	ppa007438m|PACid:17642770[]~~ppa027060m|PACid:17651214[]
RS-m0287_5p	5	ppa010628m|PACid:17641224[]~~ppa010641m|PACid:17641225[]~~ppa010636m|PACid:17664500[]~~ppa011126m|PACid:17664501[]~~ppa017657m|PACid:17662992[]
RS-m0288_3p	1	ppa016372m|PACid:17659775[]
RS-m0289_5p	4	ppa000179m|PACid:17644104[]~~ppa006191m|PACid:17642458[]~~ppa012447m|PACid:17644707[]~~ppa011041m|PACid:17641823[]
RS-m0290_5p	1	ppa014330m|PACid:17643573[]
RS-m0291_5p	17	ppa010357m|PACid:17654695[]~~ppa007164m|PACid:17643560[]~~ppa010225m|PACid:17656418[]~~ppa018340m|PACid:17651161[]~~ppa000186m|PACid:17658925[]~~ppa004414m|PACid:17645874[]~~ppa004492m|PACid:17654992[]~~ppa012876m|PACid:17645415[]~~ppa017872m|PACid:17665647[]~~ppa018385m|PACid:17663353[]~~ppa024325m|PACid:17662913[]~~ppa026099m|PACid:17656664[]~~ppa001825m|PACid:17643546[]~~ppa004320m|PACid:17641…
RS-m0293_3p	1	ppa015393m|PACid:17653080[]
RS-m0295_3p	3	ppa012437m|PACid:17648072[]~~ppa013211m|PACid:17655878[]~~ppa017834m|PACid:17641445[]
RS-m0296_3p	3	ppa012437m|PACid:17648072[]~~ppa013211m|PACid:17655878[]~~ppa017834m|PACid:17641445[]
RS-m0298_3p	2	ppa025647m|PACid:17648826[]~~ppa013658m|PACid:17662374[]
RS-m0300_3p	6	ppa000040m|PACid:17648325[]~~ppa004344m|PACid:17640464[]~~ppa022615m|PACid:17657937[]~~ppa016318m|PACid:17640599[]~~ppa002182m|PACid:17667604[]~~ppa011082m|PACid:17663211[]
RS-m0302_5p	1	ppa013896m|PACid:17651222[]
Total	1719

## Sheet: LC miRNA-target Alignment File
miRNA Identity	Target Identity	Location
>LC-m0002_3p	|ppa012437m|PACid:17648072	|location[161,180]
5'AAAGACUAAAAUACCCUUGA3'
|||||||||||xxx|||||x
3'ACGCCUCUAACUUCUCCUCCACCUCCACCUUUUCUGAUUUUCCAGGAACAAUGACGCCAACCCUCGUAGCAGAUCCUCGU5' ( -17.40[60.84%] )
>LC-m0002_3p	|ppa013211m|PACid:17655878	|location[447,466]
5'AAAGACUAAAAUACCCUUGA3'
|x|||||x|||||||||oo|
3'UGAAAUUUUUGAUCGGUUUUUGAGUCAAUUUAUCUGAGUUUAUGGGAGUUAUAAAUUUGAGUGUAUUUUGGAUUCUUCCU5' ( -21.30[74.48%] )
>LC-m0002_3p	|ppa017834m|PACid:17641445	|location[71,90]
5'AAAGACUAAAAUACCCUUGA3'
||||||||||||||||||o|
3'GAAGUGGUGGGAGUGUUUGGAUCUUUUAUCUUUCUGAUUUUAUGGGAAUUUUAUAUACCUUUUAACUUACCACAAUUUCA5' ( -26.30[92.28%] )
>LC-m0003_5p	|ppb015325m|PACid:17642759	|location[458,480]
5'GAGGGAAAAGAUAACGGUGGAUU3'
||||||||||||x||||||||||
3'AAUAAAUCGCAGCACCAAAUACUCCCUUUUCUACUGCCACCUAAGGUGCUGGUAACUUUUUGGUUUAUGUGCUG5' ( -37.50[90.58%] )
>LC-m0003_5p	|ppa022929m|PACid:17653634	|location[981,1003]
5'GAGGGAAAAGAUAACGGUGGAUU3'
||||||||||||x||||||||||
3'AAUCGCAGCACCAAAUACUCCCUUUUCUACUGCCACCUAAGGUGCUGGUAACUUUUUGGGUUAUGUGCUG5' ( -37.50[90.58%] )
>LC-m0003_5p	|ppb017580m|PACid:17668226	|location[908,930]
5'GAGGGAAAAGAUAACGGUGGAUU3'
||||||||||||x||||||||||
3'GUUGCUGCCACUAAAUCGCAGCACCAAAUACUCCCUUUUCUACUGCCACCUAAGGUGCUGGUAACUUUUUGGCUUAUGUGCUG5' ( -37.50[90.58%] )
>LC-m0003_5p	|ppb024275m|PACid:17664293	|location[1412,1434]
5'GAGGGAAAAGAUAACGGUGGAUU3'
||||||||||||x||||||||||
3'GUUGCUACCACUAAAUCGCAGCACCAAAUACUCCCUUUUCUACUGCCACCUAAGGUGCUGGUAACUUUUUAGCUUAUGUGCUG5' ( -37.50[90.58%] )
>LC-m0003_5p	|ppa021863m|PACid:17667439	|location[243,265]
5'GAGGGAAAAGAUAACGGUGGAUU3'
|||||x||||||x|x||||||x|
3'UAAAAGAACAACUGAGGAGAAAACGACUCCCUCCCGUUUCUAGUCCCACCUUAAACGCUCGGUACGAAGAUAUCCGAAAGAAA5' ( -26.10[64.60%] )
>LC-m0003_5p	|ppa022678m|PACid:17669242	|location[708,730]
5'GAGGGAAAAGAUAACGGUGGAUU3'
||||||||||||x||||||||||
3'AAUCGCAGCACCAAAUACUCCCUUUUCUACUGCCACCUAAGGUGCUGGUAACUUUUUGGUUUAUGUGCUG5' ( -37.50[90.58%] )
>LC-m0003_5p	|ppb012973m|PACid:17652586	|location[837,859]
5'GAGGGAAAAGAUAACGGUGGAUU3'
||||||||||||x||||||||||
3'AAUCGCAGCACCAAAUACUCCCUUUUCUACUGCCACCUAAGGUGCUGGUAACUUUUUGGCUUAUGUGCUG5' ( -37.50[90.58%] )
>LC-m0003_5p	|ppa015029m|PACid:17658514	|location[11,33]
5'GAGGGAAAAGAUAACGGUGGAUU3'
x|||||||||||x||||||||||
3'GUUGUUGCCACUAAAUCGCAGCACCAAAUAGUCCCUUUUCUACUGCCACCUAAGGUGCUGGUA5' ( -34.00[82.13%] )
>LC-m0003_5p	|ppa022215m|PACid:17645551	|location[110,132]
5'GAGGGAAAAGAUAACGGUGGAUU3'
||||||||||||x||||||||||
3'GUUGCUGCCACUAAAUCGCAGCACCAAAUACUCCCUUUUCUACUGCCACCUAAGGUGCUGGUAACUUUUUGGCUUAUGUGCUG5' ( -37.50[90.58%] )
>LC-m0003_5p	|ppa025043m|PACid:17666181	|location[878,900]
5'GAGGGAAAAGAUAACGGUGGAUU3'
||||||||||||x||||||||||
3'AAUAAAUCGCAGCACCAAAUACUCCCUUUUCUACUGCCACCUAAGGUGCUGGUAACUUUUUGGUUUAUGUGCUG5' ( -37.50[90.58%] )
>LC-m0003_5p	|ppa015516m|PACid:17644898	|location[188,210]
5'GAGGGAAAAGAUAACGGUGGAUU3'
||||||||||||x||||||||||
3'GUUGCUGCCACUAGAUCGCAGCACCAAAUACUCCCUUUUCUACUGCCACCUAAGGUGCUGGUAACUUUUUGGCUUAUGUGCUG5' ( -37.50[90.58%] )
>LC-m0003_5p	|ppa014651m|PACid:17650353	|location[1025,1047]
5'GAGGGAAAAGAUAACGGUGGAUU3'
||||||||||||x||||||||||
3'GUUGCUGCCACUAAAUCGCAGCACCAAAUACUCCCUUUUCUACUGCCACCUAAGGUGCUGAUAACUUUUUAGCUUAUGUGCUG5' ( -37.50[90.58%] )
>LC-m0004_5p	|ppa003448m|PACid:17648358	|location[1807,1828]
5'ACUUCACAAAGUUGGACUUGCG3'
|||||||||||||oo|||||x|
3'GAACUAUGUGACUGAUAACGUCCUCGUAGUUGAAGUGUUUCAAUUUGAACACAUCAACAUGGGGUUCUAUAGAUUGUUAUUG5' ( -27.50[72.56%] )
>LC-m0006_3p	|ppa012594m|PACid:17663215	|location[504,524]
5'UUUUGGGCAAGGUAGCAUAAG3'
|o|||o|||||xo||||||||
3'GAUCGGCUGUACUAGUUGCCGGUUCUAGAACUCGUUCGGUCGUAUUCUGUGCGGAACCAACAGUAGCGGUGGAGGGU5' ( -28.10[78.49%] )
>LC-m0006_3p	|ppa003074m|PACid:17651829	|location[767,787]
5'UUUUGGGCAAGGUAGCAUAAG3'
||o|||||x||x||||||x||
3'GGGAUGUAGUGAAGGUCAAAGGAAGAAAAAAAGACCCGCUCAAUCGUAAUCAACGGUUCGUUGAGGUGACAGGGUUCGUGC5' ( -21.90[60.16%] )
>LC-m0006_3p	|ppa004781m|PACid:17662693	|location[1219,1239]
5'UUUUGGGCAAGGUAGCAUAAG3'
|||||||||||x|xx|||||x
3'GUUGGGACUGUAGUUGCUCUCGUUCCUAUCAAAACCCGUUCGAGAGUAUUAAUAGUGUAGAUCCAUUGGUAGACUCUUGAA5' ( -23.10[63.99%] )
>LC-m0006_3p	|ppa015790m|PACid:17656910	|location[610,630]
5'UUUUGGGCAAGGUAGCAUAAG3'
||o|||||x||x||||||x||
3'GGGAUGUAGUGAAGGUCAAAGGAAGAAAAAAAGACCCGCUCAAUCGUAAUCAACGGUUCGUUGAGGUGCAUGUAUCAAGUG5' ( -21.90[60.16%] )
>LC-m0009_3p	|ppa004515m|PACid:17652373	|location[1872,1894]
5'UCUAGGAAAUAGAAAUUGUAGGG3'
|||||||||||||||ox||||||
3'AUAUAUCUAAAGUUUUAAUUACUCAACUGCAGAUCCUUUAUCUUUGCCAUCCCGAUAGGGAUGAAAGAAGAAAUUAAAGUGAC5' ( -32.70[89.59%] )
>LC-m0010_3p	|ppa012437m|PACid:17648072	|location[161,180]
5'AAAGACUAAAAUACCCUUGA3'
|||||||||||xxx|||||x
3'ACGCCUCUAACUUCUCCUCCACCUCCACCUUUUCUGAUUUUCCAGGAACAAUGACGCCAACCCUCGUAGCAGAUCCUCGU5' ( -17.40[60.84%] )
>LC-m0010_3p	|ppa013211m|PACid:17655878	|location[447,466]
5'AAAGACUAAAAUACCCUUGA3'
|x|||||x|||||||||oo|
3'UGAAAUUUUUGAUCGGUUUUUGAGUCAAUUUAUCUGAGUUUAUGGGAGUUAUAAAUUUGAGUGUAUUUUGGAUUCUUCCU5' ( -21.30[74.48%] )
>LC-m0010_3p	|ppa017834m|PACid:17641445	|location[71,90]
5'AAAGACUAAAAUACCCUUGA3'
||||||||||||||||||o|
3'GAAGUGGUGGGAGUGUUUGGAUCUUUUAUCUUUCUGAUUUUAUGGGAAUUUUAUAUACCUUUUAACUUACCACAAUUUCA5' ( -26.30[92.28%] )
>LC-m0012_3p	|ppa026908m|PACid:17656743	|location[141,161]
5'UUUGAAUUAAGAGUAGACACC3'
|o|||x|||||||||||x||x
3'GGAAACUGUAGACGUGGCCACGAAGCUCCCAGACUCAAUUCUCAUCUCUGUGUUUGUAGUAUUAACCCACAAACAAACGUC5' ( -20.50[64.67%] )
>LC-m0014_3p	|ppa007909m|PACid:17657836	|location[251,271]
5'AUCGCACGAUCGGACGGUUAC3'
|x|||||||||||||||||xx
3'UCACCGGUUUUUAAAGGGUCUACCCCUGGUUCGCGUGCUAGCCUGCCAAGAUCACACUCAAAGUAGGUUUUGACGGAACGU5' ( -34.50[86.25%] )
>LC-m0015_5p	|ppa021337m|PACid:17641303	|location[271,293]
5'UUUGGGGAAGACGAUGAAUAGUA3'
|||||||||||x|||||xx||x|
3'AACGUGAGAAGAUCAAAGUCCUCGGUCGGGAAACCCCUUCUACUACUACUCCUACCACUACUGCACCUCCGCAUUCCUUUACC5' ( -25.30[64.71%] )
>LC-m0016_3p	|ppa006634m|PACid:17655522	|location[1241,1261]
5'CAGCCAAGGAUGACUUGCCGG3'
x|||||||o||||x||||||x
3'GGUAAGUAGAUACGGUGUUCGUGUUCUUGUUUCGGUUCUUACUUAACGGCGGACCGUUUGUGUAACGGUUUCUAUAUUGGU5' ( -30.00[68.65%] )
>LC-m0016_3p	|ppa012173m|PACid:17666161	|location[698,718]
5'CAGCCAAGGAUGACUUGCCGG3'
x|||||||o||||x|||||x|
3'GUGUUGUGGGUUAUUAAUGUUUUCAUUGGUUUCGGUUCUUACUAAACGGACUAUAUCUGUAACGUGUCGUCCCAAAGUGGG5' ( -28.00[64.22%] )
>LC-m0017_3p	|ppb024266m|PACid:17667129	|location[575,596]
5'UUUCCGAAACCUCCCAUUCCAA3'
||o||x||||||||x|||||x|
3'AGUAACAUGUCGUUAAACCGGUCACACCAGAAGGGGUUUGGAGGUUAAGGGUGAUAACCUUACUGUCUUUGUAAGAAUAACA5' ( -27.60[70.05%] )
>LC-m0017_3p	|ppa014805m|PACid:17654682	|location[1631,1652]
5'UUUCCGAAACCUCCCAUUCCAA3'
|||||||||||x||x|ox||||
3'CAUGGUAGACGGUUGUGGGGUUCUAUGUGAAAAGGCUUUGGUGGUUGUGGUUAGUGACGGAAGAGUAGUUUCAAAACACAAC5' ( -24.70[62.53%] )
>LC-m0017_3p	|ppa001010m|PACid:17646217	|location[1975,1996]
5'UUUCCGAAACCUCCCAUUCCAA3'
||||||x||||o||xx||||||
3'AAUGGUAAUCGUUCAUGUUGAGACAUUUGUAAAGGCCUUGGGGGAAAAGGUUAAUCUAAGAGAACGCAUUACCUUAGUUCUU5' ( -25.60[65.14%] )
>LC-m0017_3p	|ppa002873m|PACid:17646454	|location[946,967]
5'UUUCCGAAACCUCCCAUUCCAA3'
|||||||||||x|||x|x||||
3'CAUGGUAGAGCCUCUGUAGGAAACAUCUGUAAAGGCUUUGGUGGGAACGGUUGGUUCAAAAACGAUGACUUCAACACACAAC5' ( -26.50[67.60%] )
>LC-m0017_3p	|ppa005870m|PACid:17662402	|location[1988,2009]
5'UUUCCGAAACCUCCCAUUCCAA3'
|||||||x|||||||||||xx|
3'UCACUAUAAUACUUUACUCUUAGAUUUAAGAAAGGCUAUGGAGGGUAAGACUACUCCACCAAAACGAAUCACGAUUGAUUAC5' ( -30.90[78.23%] )
>LC-m0017_3p	|ppa016819m|PACid:17665151	|location[635,656]
5'UUUCCGAAACCUCCCAUUCCAA3'
|||||x||x||||||||o||x|
3'AGUAAUAUCUGAUUGACCCGUUUCCGUCAAAAAGGAUUAGGAGGGUAGGGGUGUUACCCCUAGUGUUUACCCGAGAAGGGAA5' ( -27.90[70.81%] )
>LC-m0017_3p	|ppa1027175m|PACid:17654226	|location[542,563]
5'UUUCCGAAACCUCCCAUUCCAA3'
||x||||x|||||||||||||x
3'ACACGUGGUUGGACAAAGUGGUACCAACAAAACGGCUGUGGAGGGUAAGGUAUCUGGGGUUAGUGUCACUGGAAUAGUAGAA5' ( -32.10[81.47%] )
>LC-m0017_3p	|ppa016435m|PACid:17668357	|location[2155,2176]
5'UUUCCGAAACCUCCCAUUCCAA3'
||||x||||||x|||x||||||
3'CUAUAUUUAGUCUCUCAAAACUCUUUACUCAAAGUCUUUGGUGGGGAAGGUUUCUCAAGUACGACUUUAGCUACGUGGUAUC5' ( -24.50[62.66%] )
>LC-m0017_3p	|ppa019519m|PACid:17661868	|location[1729,1750]
5'UUUCCGAAACCUCCCAUUCCAA3'
||||x||||||x|||x||||||
3'UAAGAUUAAACCUCUCAAAACUCUUUACUCAAAGACUUUGGUGGGGAAGGUUUCUCAAGUACGACUUUAGUUACAGUAUGUC5' ( -24.50[62.66%] )
>LC-m0017_3p	|ppa025207m|PACid:17668203	|location[2155,2176]
5'UUUCCGAAACCUCCCAUUCCAA3'
||||x||||||x|||x||||||
3'CUAUAUUUAGUCUCUCAAAACUCUUUACUCAAAGUCUUUGGUGGGGAAGGUUUCUCAAGUACGACUUUAGCUACGUGGUAUC5' ( -24.50[62.66%] )
>LC-m0017_3p	|ppa026334m|PACid:17660376	|location[560,581]
5'UUUCCGAAACCUCCCAUUCCAA3'
||o||ox||||||||||||||x
3'GCUAACAAGUUCCAAAAAUGAUCACAUCAAAAGGGUCUUGGAGGGUAAGGUAUUUGUCGUUAGGAACACUAAGGAAAUAGUC5' ( -32.90[83.50%] )
>LC-m0017_3p	|ppb000367m|PACid:17653109	|location[1729,1750]
5'UUUCCGAAACCUCCCAUUCCAA3'
||||x||||||x|||x||||||
3'UAAGAUUAAACCUCUCAAAACUCUUUACUCAAAGACUUUGGUGGGGAAGGUUUCUCAAGUACGACUUUAGUUACAGUAUGUC5' ( -24.50[62.66%] )
>LC-m0017_3p	|ppa017081m|PACid:17654789	|location[234,255]
5'UUUCCGAAACCUCCCAUUCCAA3'
||||x|||||||||||x||x|x
3'GUUCUUGGAGAGUAACAGGAGAAGUCUUGGAAAGUCUUUGGAGGGUUAGUUAAGAAAAGAAAGAACUUUUGGUUCUAAACCA5' ( -24.90[63.04%] )
>LC-m0017_3p	|ppa000373m|PACid:17640939	|location[1200,1221]
5'UUUCCGAAACCUCCCAUUCCAA3'
||o||x||x|||||||||||x|
3'ACUACUAUAUAUCUAAAUCGGUUUCAACAAAAGGGGUUGGGAGGGUAAGGGUGUUACCCGUAGUGGCUCUCUAUCAAGAGAA5' ( -29.90[75.89%] )
>LC-m0017_3p	|ppa001164m|PACid:17657318	|location[1619,1640]
5'UUUCCGAAACCUCCCAUUCCAA3'
||x||o||||||||||oo||||
3'CGAGGUGGUAGCUAAAGUGGGAACAUUUGGAACGGUUUUGGAGGGUGGGGUUCCUCAUCGCGGAGUAGUUUCAAAAACCACC5' ( -32.20[81.93%] )
>LC-m0017_3p	|ppa001409m|PACid:17643330	|location[1828,1849]
5'UUUCCGAAACCUCCCAUUCCAA3'
||o||o|||||x||x|||||||
3'CAAGGUAGUAAAUUCUGAGGAAACAUAUGGAAGGGUUUUGGUGGUUAAGGUUAUUGGGUUGAGAGUAGUUUCAAUAAACAUC5' ( -26.20[66.33%] )
>LC-m0017_3p	|ppa003078m|PACid:17659604	|location[866,887]
5'UUUCCGAAACCUCCCAUUCCAA3'
|||||o|||||||||xx|||x|
3'CACAACAGUCUAUCGUGAGGAAAUAUCUGAAAAGGUUUUGGAGGGACAGGAUCUUGUAAAAAGAGUGACUUCAACAGACAAC5' ( -30.10[76.59%] )
>LC-m0017_3p	|ppa019044m|PACid:17655472	|location[923,944]
5'UUUCCGAAACCUCCCAUUCCAA3'
||o||o||x||||||||x||||
3'CUGGGUAGAAGAUUAUAGGGGAACAUUUGUAAGGGUUUAGGAGGGUAUGGUUAUUACAAGAGGGAACUCUUUAAGGGACAUC5' ( -28.10[71.50%] )
>LC-m0017_3p	|ppa002803m|PACid:17645048	|location[174,195]
5'UUUCCGAAACCUCCCAUUCCAA3'
||||||||x|||x|||o|||x|
3'AUGAAAGCUUAGAAAACGAAGUUCGUUGUCAAAGGCUUAGGAAGGUGAGGCUCUUUGAUCUCCCUUGAACACUUCACGUUUC5' ( -27.40[70.26%] )
>LC-m0017_3p	|ppa020021m|PACid:17661193	|location[455,476]
5'UUUCCGAAACCUCCCAUUCCAA3'
|||||||x||||||x||x||||
3'AACAGCAUCUGAAACGAACGUUCUCACCAGAAAGGCUCUGGAGGUUACGGUUGGUUACUUGACUGACUCGCAGAUCUACGAU5' ( -25.00[63.45%] )
>LC-m0017_3p	|ppa022038m|PACid:17667143	|location[2494,2515]
5'UUUCCGAAACCUCCCAUUCCAA3'
||||xo||x|||x|||||||||
3'CUGUUCCCUUACUGUGUCCAAAAGGUCGAUAAAGCUUUGGGAAGGUAAGGUUGUUUAAGCCGUAUAGUAUUUCGAGUUCAAC5' ( -24.20[61.73%] )
>LC-m0017_3p	|ppa1027204m|PACid:17669052	|location[554,575]
5'UUUCCGAAACCUCCCAUUCCAA3'
||x||||x|||||||||x||x|
3'ACUAACAUGUUAAAAAACCGUUCUCAUCAAAACGGCUCUGGAGGGUACGGGUGUUAUCUUUGGUGUGCCGCUGCUCCGAGGU5' ( -27.70[70.30%] )
>LC-m0018_3p	|ppa015313m|PACid:17653536	|location[671,692]
5'UUGCCUAUUCCUCCCAUGCCAA3'
|||||x|||||x|||||x|||x
3'ACCAAUAUUCGUCAGAACCGUUACCACCAGAACGGUUAAGGUGGGUAGGGUAUCUGAUGUCGAUGAGGUUGUAGUGAACUAG5' ( -29.60[69.16%] )
>LC-m0018_3p	|ppa025931m|PACid:17641814	|location[665,686]
5'UUGCCUAUUCCUCCCAUGCCAA3'
|||||x|||||x|||||x|||x
3'ACCAAUAUUCGUCAGAACCGUUACCACCAGAACGGUUAAGGUGGGUAGGGUAUCUGAUGUCGAUGAGGUUGUAGUGAACUAG5' ( -29.60[69.16%] )
>LC-m0018_3p	|ppa017433m|PACid:17649403	|location[668,689]
5'UUGCCUAUUCCUCCCAUGCCAA3'
||x||||||||x|x|||||||x
3'CAUAAUAUUUGUCUGAAACGUUACCAACAGAAGGGAUAAGGUGAGUACGGUAUUUAAUGUUCAUACGGCUGUAGUAGACUAG5' ( -27.20[63.55%] )
>LC-m0018_3p	|ppa022023m|PACid:17662758	|location[491,512]
5'UUGCCUAUUCCUCCCAUGCCAA3'
||x||||||||x|x|||||||x
3'CAUAAUAUUUGUAUGAAACGUUACCAACAGAAGGGAUAAGGUGAGUACGGUAUUUAAUGUUCAUACGGCUGUAGUAGACUAG5' ( -27.20[63.55%] )
>LC-m0018_3p	|ppa026003m|PACid:17641205	|location[674,695]
5'UUGCCUAUUCCUCCCAUGCCAA3'
||x||||||||x|x|||||||x
3'CAUAAUACUUCUCUGAAACGUUACCAACAGAAGGGAUAAGGUGAGUACGGUAUUUAAUGUUCAUAUGGCUGUAGUAGACUAG5' ( -27.20[63.55%] )
>LC-m0018_3p	|ppb014730m|PACid:17641227	|location[617,638]
5'UUGCCUAUUCCUCCCAUGCCAA3'
||||||||o|||x||x|o||||
3'AACAACUUAUAGUUAACCGUUUCACAACAAAACGGAUAGGGAAGGGAUGGUUGUUACGGAUGACGGAACUUGGCUAGUACUG5' ( -31.60[73.83%] )
>LC-m0018_3p	|ppa020719m|PACid:17658044	|location[227,248]
5'UUGCCUAUUCCUCCCAUGCCAA3'
|||||||oo||x|||||x||||
3'AGUAACAUUUCGUCAGCCCGUUCCCAACAGAACGGAUGGGGCGGGUAAGGUUGUUACCACUCCUGUCUGUGUAGUAGGAACG5' ( -30.70[71.73%] )
>LC-m0018_3p	|ppa000953m|PACid:17660995	|location[590,611]
5'UUGCCUAUUCCUCCCAUGCCAA3'
||x||o|||||||||||x|||x
3'AGUAGUAUCUGAACGAACCGGUUCCACCAGAAGGGGUAAGGAGGGUAAGGUCGGUUGCUUUGAUGAAGCGCCGGUCUUGACG5' ( -31.80[74.30%] )
>LC-m0018_3p	|ppa026111m|PACid:17662995	|location[509,530]
5'UUGCCUAUUCCUCCCAUGCCAA3'
||x|||||x||||||||x|||x
3'AGUAGUAUUUGAAAGAAGUGGUUCCACCAGAAGGGAUACGGAGGGUAAGGUCACUGACUUUGAUGAAGUGCAGGUCUCGGUG5' ( -27.10[63.17%] )
>LC-m0018_3p	|ppa019385m|PACid:17654769	|location[620,641]
5'UUGCCUAUUCCUCCCAUGCCAA3'
|||||x|||||x|||||x|||x
3'ACCAAUAUUCGUCAGAACCGUUACCACCAGAACGGUUAAGGUGGGUAGGGUAUCUGAUGUCGAUGAGGUUGUAGUGAACUAG5' ( -29.60[69.16%] )
>LC-m0018_3p	|ppa001090m|PACid:17658188	|location[703,724]
5'UUGCCUAUUCCUCCCAUGCCAA3'
||x|||||x||o||||||||x|
3'ACUACUAUUUGGAGAAAACGUUCUCAUCAGAAAGGAUAUGGGGGGUACGGGUUAUAUCGUUAUUGACCUAGAAGUAAAACAA5' ( -31.10[72.66%] )
>LC-m0018_3p	|ppa016819m|PACid:17665151	|location[635,656]
5'UUGCCUAUUCCUCCCAUGCCAA3'
||x||||x|||||||||x||x|
3'AGUAAUAUCUGAUUGACCCGUUUCCGUCAAAAAGGAUUAGGAGGGUAGGGGUGUUACCCCUAGUGUUUACCCGAGAAGGGAA5' ( -28.70[67.06%] )
>LC-m0018_3p	|ppa021718m|PACid:17647832	|location[626,647]
5'UUGCCUAUUCCUCCCAUGCCAA3'
|||||||||||x|||||x||x|
3'ACCAAUAUUUACCGAGCCCGUUCACAACAAAACGGAUAAGGUGGGUAGGGGUUUUAAGGUUGAUACGCUUGUAGUAGACUAG5' ( -33.10[77.34%] )
>LC-m0018_3p	|ppa014763m|PACid:17662144	|location[311,332]
5'UUGCCUAUUCCUCCCAUGCCAA3'
||x||||||||x|x|||||||x
3'CUUAAUAUUUGUCUGAAACGUUACCAACAGAAGGGAUAAGGUGAGUACGGUAUUUAAUGUUCAUACGGUUGUAGUAAACUAG5' ( -27.20[63.55%] )
>LC-m0018_3p	|ppa018842m|PACid:17663628	|location[638,659]
5'UUGCCUAUUCCUCCCAUGCCAA3'
|||||o||x||||||||x||x|
3'AGUAAUAUCCGAUCAACCCAAUUUCAACAAAACGGGUACGGAGGGUAGGGCUGUUAUCCCUACUAUUCCUUGGGGAAGGGAA5' ( -32.90[76.87%] )
>LC-m0018_3p	|ppa021551m|PACid:17643473	|location[638,659]
5'UUGCCUAUUCCUCCCAUGCCAA3'
|||||o||x||||||||x||x|
3'AGUAAUAUCCGAUCAACCCAAUUUCAACAAAACGGGUACGGAGGGUAGGGCUGUUAUCCCUACUAUUCCUUGGGGAAGGGAA5' ( -32.90[76.87%] )
>LC-m0018_3p	|ppa023828m|PACid:17649287	|location[377,398]
5'UUGCCUAUUCCUCCCAUGCCAA3'
||x||||||||x|x|||||||x
3'CUUAAUAUUUGUUUGAAACGUUACCAACAGAAGGGAUAAGGUGAGUACGGUAUUUAAUGUUCAUACGGUUGUAGUAGACUAG5' ( -27.20[63.55%] )
>LC-m0018_3p	|ppa001182m|PACid:17644336	|location[554,575]
5'UUGCCUAUUCCUCCCAUGCCAA3'
||o||||ox||||||||||||x
3'AAUAACAACUAGAACCAGUUUUCCCAUCAGAAUGGAUGUGGAGGGUACGGUAUGUUCGGUUAUUAAGGGUGAACGAGAAGAA5' ( -36.70[85.75%] )
>LC-m0018_3p	|ppa015899m|PACid:17667665	|location[581,602]
5'UUGCCUAUUCCUCCCAUGCCAA3'
|||||x|||||||||||x||x|
3'GAGAAUAUCCGUUCAACCCGUUCUCAACAGAACGGUUAAGGAGGGUAGGGAUAUUAUCCCUACUGUUCCGUCCAACGGGGAG5' ( -33.00[76.92%] )
>LC-m0018_3p	|ppa016447m|PACid:17664281	|location[635,656]
5'UUGCCUAUUCCUCCCAUGCCAA3'
||x||o|||||||||||x||x|
3'AGUAAUAUCCGAUCAACACGUUCUCAACAGAAAGGGUAAGGAGGGUAGGGGUGUUACCCCUAUUGUUCCCCUGGGCAAUGUU5' ( -31.60[73.83%] )
>LC-m0018_3p	|ppa017700m|PACid:17654457	|location[419,440]
5'UUGCCUAUUCCUCCCAUGCCAA3'
|||||x||o||||||||x||x|
3'GUAUUGGGUUACUCAAACCGUUCUCAACAGAACGGUUAGGGAGGGUAGGGAUAUUAUCCCUACUGUUCCGUCCAGCGGGGAG5' ( -32.50[75.76%] )
>LC-m0018_3p	|ppa020323m|PACid:17666995	|location[614,635]
5'UUGCCUAUUCCUCCCAUGCCAA3'
|||||x||o||||||||x||x|
3'AGUAAUAUCCGUUCAACCCGUUCUCAACAGAACGGUUAGGGAGGGUAGGGAUAUUAUCCCUACUGUUCCGUCCAGCGGGGAG5' ( -32.50[75.76%] )
>LC-m0018_3p	|ppa021014m|PACid:17665584	|location[599,620]
5'UUGCCUAUUCCUCCCAUGCCAA3'
||o||x|||||||||||x||x|
3'AGUAAUAUACGUUCAACCCGUUCUCAACAGAAUGGUUAAGGAGGGUAGGGAUGUUAACCCUACUGUUCCUUCAAACCGGAAC5' ( -31.00[72.43%] )
>LC-m0018_3p	|ppa022649m|PACid:17656454	|location[617,638]
5'UUGCCUAUUCCUCCCAUGCCAA3'
|||||x|||||||||||x||x|
3'AGCAAUAUCUGUUCAACCCGUUCUCAACAGAACGGUUAAGGAGGGUAGGGAUAUUAUCCCUACUGUUCCGUCCAACGGGGAG5' ( -33.00[76.92%] )
>LC-m0018_3p	|ppa025816m|PACid:17650752	|location[455,476]
5'UUGCCUAUUCCUCCCAUGCCAA3'
|||||o|||||||||||x||x|
3'AGUAAUAUCCGAUCAACCCGUUCUCAACAGAACGGGUAAGGAGGGUAGGGAUUUUAUCUCUGCUGUUCUCCUGGGGAGAGGA5' ( -37.20[86.92%] )
>LC-m0018_3p	|ppa017946m|PACid:17669245	|location[317,338]
5'UUGCCUAUUCCUCCCAUGCCAA3'
||||||xx|||||||||x||x|
3'AACCACUUUCGGGAACGUUGAUCUCAACAGAACGGACUAGGAGGGUAGGGGUUGUGCCUCUGUUAUCAAACCGCAACGAGAA5' ( -32.30[75.47%] )
>LC-m0018_3p	|ppa024822m|PACid:17655911	|location[605,626]
5'UUGCCUAUUCCUCCCAUGCCAA3'
|||||x||o|||||||||||x|
3'AACAACAUAUGCUCGACUCGUUCUCACCAGAACGGCUAGGGAGGGUACGGGUGUUACCCUUGGUGUGAAUAAAAUAAAAGUC5' ( -36.80[85.98%] )
>LC-m0018_3p	|ppa016254m|PACid:17668240	|location[449,470]
5'UUGCCUAUUCCUCCCAUGCCAA3'
|||||x||||||||x||o||||
3'AGCAAUAUACGGUUGACUCAUUCUCAACAGAACGGUUAAGGAGGUUAUGGUUAAUAACCUUAUGUUCAACGUAUAGGUAGGA5' ( -29.90[69.70%] )
>LC-m0018_3p	|ppa018717m|PACid:17664914	|location[497,518]
5'UUGCCUAUUCCUCCCAUGCCAA3'
||o||x||||||||x|||||x|
3'AGUAAUAUACUGUAAACUCGUUCUCACCAGAAUGGUUAAGGAGGCUACGGCUACUAACCUUACGUACAGCGUAUACUUGUUG5' ( -29.10[67.83%] )
>LC-m0018_3p	|ppa021797m|PACid:17667495	|location[587,608]
5'UUGCCUAUUCCUCCCAUGCCAA3'
|||||||xo||||||||x|||x
3'ACUACCAUUUGGAAGGAUCGGUCUCACCAGAACGGAUUGGGAGGGUAAGGUGUAUAACUUUGGUGAGCUGACGGCCUCAAAG5' ( -31.60[73.83%] )
>LC-m0018_3p	|ppa022038m|PACid:17667143	|location[581,602]
5'UUGCCUAUUCCUCCCAUGCCAA3'
||x||x||||||||||||||x|
3'AGCAACAUGUACUGAACACGUUCUCGACAGAAAGGUUAAGGAGGGUACGGAUGUUCACGCUAGUGUGCUUGAACAACAACGA5' ( -32.10[75.00%] )
>LC-m0018_3p	|ppa022091m|PACid:17654712	|location[674,695]
5'UUGCCUAUUCCUCCCAUGCCAA3'
||o||||||||o||x|||||x|
3'GAGAGCAUUUGUUGAGACCGUUGUCAACAGAAUGGAUAAGGGGGUUACGGGUUUUAGGGAUACCGUGUUUGAAAUACGUCGG5' ( -32.40[75.70%] )
>LC-m0018_3p	|ppa022198m|PACid:17647367	|location[374,395]
5'UUGCCUAUUCCUCCCAUGCCAA3'
||o||x||||||||x||o||||
3'AGUAAUAUAGGGUUAACUCGUUCUCACCAGAAUGGUUAAGGAGGUUAUGGUUUAUAACUUUAUGUACAACGUAUAGGAAGGA5' ( -27.80[64.95%] )
>LC-m0018_3p	|ppa1027179m|PACid:17658650	|location[686,707]
5'UUGCCUAUUCCUCCCAUGCCAA3'
||o||||||||o||x|||||x|
3'GAGAGCAUUUGUUGAGAACGUUGUCAACAGAAUGGAUAAGGGGGUUACGGGUUUUAGGGAUACUGUGUUUGAAAUACGUCGG5' ( -32.40[75.70%] )
>LC-m0018_3p	|ppb022444m|PACid:17664258	|location[1139,1160]
5'UUGCCUAUUCCUCCCAUGCCAA3'
||||||||x||x|||||x|||x
3'CACUUUUGUUGAAGAAGGUGGUUCCAACAUAACGGAUAUGGCGGGUAAGGUGUAUAAUGUUGGCCUAACUAAACUAGUAGAC5' ( -27.00[63.38%] )
>LC-m0018_3p	|ppa001015m|PACid:17660055	|location[1305,1326]
5'UUGCCUAUUCCUCCCAUGCCAA3'
|||||x|x|||||||||o||||
3'AACAGUAUAUGAAAGAACCGUUCUCACCAGAACGGUUCAGGAGGGUAUGGUUCGUGACUAUAGUGAAGUGCCGCAAGUACAA5' ( -33.30[77.99%] )
>LC-m0018_3p	|ppa001315m|PACid:17643516	|location[582,603]
5'UUGCCUAUUCCUCCCAUGCCAA3'
|||||||||||||||||x||xx
3'CAUAGUUUGUGGUGAACACGUUCUCAACAGAACGGAUAAGGAGGGUAGGGGGUAUAGGGAUUCGAUACUUGUAGAAAUGUGU5' ( -37.30[87.15%] )
>LC-m0018_3p	|ppa015920m|PACid:17642956	|location[554,575]
5'UUGCCUAUUCCUCCCAUGCCAA3'
|||||x|x|||||||||o||||
3'GACAGUAUUUGAAAGAACCGUUCUCACCAGAACGGUUCAGGAGGGUAUGGUUCGUGGUUUUAGUGAUGUGCCGCAAGUACAA5' ( -33.30[77.99%] )
>LC-m0018_3p	|ppa016138m|PACid:17658303	|location[575,596]
5'UUGCCUAUUCCUCCCAUGCCAA3'
|||||||oo||x|||||x||||
3'AGUAACAUUUCGUCAGCCCGUUCCCAACAGAACGGAUGGGGCGGGUAAGGUUGUUACCACUCCUGUCUGUGUAGUAGGAACG5' ( -30.70[71.73%] )
>LC-m0018_3p	|ppa021541m|PACid:17662924	|location[575,596]
5'UUGCCUAUUCCUCCCAUGCCAA3'
|||||x||o||x|||||x||||
3'AGUAAUAUUUCGUCAGCCCGUUCCCAACAGAACGGUUAGGGUGGGUAAGGUUGUUACCACUCCUGUCUGUGUAGUAGGAAUG5' ( -27.00[63.08%] )
>LC-m0018_3p	|ppa023276m|PACid:17657302	|location[674,695]
5'UUGCCUAUUCCUCCCAUGCCAA3'
||x||x|||||||||||x|||x
3'GCCAAUAUUCGUCGAAACCGUUACCACCAGAAAGGUUAAGGAGGGUAGGGUAUCUAGUGUCGAUGUGGUUGUCGUAAACUAG5' ( -28.40[66.36%] )
>LC-m0019_5p	|ppa003578m|PACid:17653567	|location[214,234]
5'UUUGGAAUGAGCGUGUUGGAA3'
||x||||x||||o|||||||x
3'GAAAAGUUAACUUAGUUUCUCGAAUACCCUAACCCUUUCUCGUACAACCUGACUUUUGGACGGUUUCAGUAUCUGUAACCG5' ( -26.40[73.54%] )
>LC-m0019_5p	|ppa000538m|PACid:17651196	|location[2040,2060]
5'UUUGGAAUGAGCGUGUUGGAA3'
|||o||x|o|||o||||||||
3'CAGUUCAACAAUAUUCUUUUUAGUUUCGACAAAUCUGAUUCGUACAACCUUUUACGACUACCCUACCUGGGACUCUCUACC5' ( -25.70[71.99%] )
>LC-m0019_5p	|ppa013273m|PACid:17658595	|location[5,25]
5'UUUGGAAUGAGCGUGUUGGAA3'
|||x||||||||||x||||xx
3'CUAAACAUCAUUAAUUCUCCUUCUCUCUGCAAAACUUACUCGCAGAACCACUUCA5' ( -24.90[69.75%] )
>LC-m0019_5p	|ppa017059m|PACid:17649718	|location[380,400]
5'UUUGGAAUGAGCGUGUUGGAA3'
|||||||||||x||||||oxx
3'GACUCUAAAGAUGACGAUAGAAGUAAGCGUAAACCUUACUCUCACAACUACUAGGAAACGAAAAAGGUACUUAUACGAGCA5' ( -25.80[72.07%] )
>LC-m0020_3p	|ppa015660m|PACid:17657187	|location[1915,1935]
5'CAUUAGAGCGGUGGUACACAA3'
||||||||x||||x||x|||x
3'UAAACUACUUUCUAGUUACGAGAAAUGGUCGUAAUCUCACCACAAUAUGUGCUCAAGAAGGGGAAAAUUACAGUCGUGCCA5' ( -24.20[64.36%] )
>LC-m0021_3p	|ppa007826m|PACid:17660405	|location[20,40]
5'UAAAGUGAUUAUAUGGAGAAG3'
||xx||o|||||x||||||||
3'ACCGUUUGUUUUAUGAACGGUUAUAAAAUCAUGACAUUAAUAAACCUCUUCUUCUUCUUCUUCUACCGUA5' ( -20.40[68.00%] )
>LC-m0023_5p	|ppa014378m|PACid:17668275	|location[143,165]
5'CAUCGGAGAGCCUUUGGCCGGUA3'
||||||||||||||o|||xo||x
3'CGGUUUUAAUGGUGUAUAUCGACUGAAUUCGUAGCCUCUCGGAAGCCGUUCAAGUGGCUUAAGACUUCCAAGAGUGGAAGAGG5' ( -39.40[81.74%] )
>LC-m0023_5p	|ppa003234m|PACid:17644268	|location[1685,1707]
5'CAUCGGAGAGCCUUUGGCCGGUA3'
||||||||x||||||||||ooo|
3'AAGAGAUUUCUAGCUAACUUGACUGAAUCCGUAGCCUCCCGGAAACCGGUUGUGGGGGGCCCAGACCAGAAAAUGAGGCUAGA5' ( -36.80[76.35%] )
>LC-m0023_5p	|ppa023105m|PACid:17640814	|location[1131,1153]
5'CAUCGGAGAGCCUUUGGCCGGUA3'
||||||||x||||||||||ooo|
3'AAUCCGUAGCCUCCCGGAAACCGGUUGUGGGGAGCCCACACCAGGAAAAUGAGGCUAG5' ( -36.80[76.35%] )
>LC-m0025_3p	|ppa009397m|PACid:17656533	|location[1000,1020]
5'UGCCAAAGAAGAGUUGCCCUA3'
ox|||||||||||||||xx||
3'UUUUAGAGGUAUUGUUCGUUCACGUAGGUAGAGGUUUCUUCUCAACGUAAUGGAGAGUCAUAAGAGACAAGUUUGUUCCUU5' ( -27.40[69.90%] )
>LC-m0025_3p	|ppa015730m|PACid:17660744	|location[338,358]
5'UGCCAAAGAAGAGUUGCCCUA3'
x||||||||||x||||x||||
3'UUAGCUUUCUGACUCUUCCUUUGAACAAUUCCGGUUUCUUCACAACCGGAUACUUCGGUAACCUCCCCCACGGUUUCCGGU5' ( -25.70[65.73%] )
>LC-m0025_3p	|ppa003154m|PACid:17650304	|location[866,886]
5'UGCCAAAGAAGAGUUGCCCUA3'
|x||||||||||||o|||||x
3'AUUCGUCGUCGACUAAACUCGUCGAAGUCGAAGGUUUCUUCUCAGCGGGAGCCAUAUUAUAGUCGGUUUCUGCUCUCCGUA5' ( -34.00[86.96%] )
>LC-m0025_3p	|ppa004613m|PACid:17651940	|location[338,358]
5'UGCCAAAGAAGAGUUGCCCUA3'
x||||||||||x||||x||||
3'UUAGCUUUCUGACUCUUCCUUUGAACAAUUCCGGUUUCUUCACAACCGGAUACUUCGGUAACCUCCCCCACGGUUUCCGGU5' ( -25.70[65.73%] )
>LC-m0025_3p	|ppa024435m|PACid:17650881	|location[248,268]
5'UGCCAAAGAAGAGUUGCCCUA3'
xo||||||||||x|||||||x
3'GAAAGAAAGAAGGGUUAAACAGUGGUUCGGUUGGUUUCUUCUGAACGGGACGGUUACACGGUGUUUCACGGUGUGGUAACU5' ( -31.30[79.85%] )
>LC-m0025_3p	|ppa025234m|PACid:17662545	|location[248,268]
5'UGCCAAAGAAGAGUUGCCCUA3'
x|||||||||||||||||||x
3'GAAAAAAGGAUGGUUCAAAUAGAGGUUCGGUCGGUUUCUUCUCAACGGGACGAUCCCAAGGUUUGUUUCGUUGGGGUCAAU5' ( -37.50[95.66%] )
>LC-m0026_5p	|ppa005679m|PACid:17651251	|location[7,27]
5'GGAUUGUUUAGUGUGCGGAUU3'
|||x|||o||||o||||||||
3'ACACAAAGCAUGCAGUUGAAAAACCGCGCACCUUACAGAUCAUACGCCUAAAAAAAC5' ( -31.70[86.38%] )
>LC-m0027_3p	|ppa004145m|PACid:17648954	|location[910,931]
5'AAAUUUCGUCGGGAGAGGUUAA3'
|||||o|xx|||||||||x|||
3'UUCUGGAAAAGACCACCCUCUAGUUACGGGUUUAAGGGUGCCCUCUCCUAUUAUGGUAGUCGAAGAACAUCUUAGAGUAGUU5' ( -23.90[65.30%] )
>LC-m0027_3p	|ppa026152m|PACid:17662938	|location[41,62]
5'AAAUUUCGUCGGGAGAGGUUAA3'
||||x||||||||||||||ox|
3'UUAACGUUUUAAUCUGCACGUGUUUGAUUUUUUACAGCAGCCCUCUCCAGAUUAGGCCGUUUAUAAACAGCUGUAUUUGGAU5' ( -31.40[87.47%] )
>LC-m0027_3p	|ppa016026m|PACid:17667011	|location[448,469]
5'AAAUUUCGUCGGGAGAGGUUAA3'
||||||||||||||||||||xx
3'AGCCGUAUCCAGAUACGUGGACACGGCUGCUUUAAAGCAGCCCUCUCCAACACAAGAAAAAAAAAAACAUGCACAUAUUAUA5' ( -34.50[96.37%] )
>LC-m0027_3p	|ppa016026m|PACid:17667011	|location[563,584]
5'AAAUUUCGUCGGGAGAGGUUAA3'
||||||||||||x|x||||ox|
3'GUAACUGGUUAUAACAAGUGAGAGCGCUGUUUUAAAGCAGCCGUAUCCAGAUACGGCUGCUUUAAACGGCCUAAUCCAAAGG5' ( -24.00[66.67%] )
>LC-m0034_3p	|ppa026908m|PACid:17656743	|location[141,161]
5'UUUGAAUUAAGAGUAGACACC3'
|o|||x|||||||||||x||x
3'GGAAACUGUAGACGUGGCCACGAAGCUCCCAGACUCAAUUCUCAUCUCUGUGUUUGUAGUAUUAACCCACAAACAAACGUC5' ( -20.50[64.67%] )
>LC-m0035_3p	|ppa026908m|PACid:17656743	|location[141,161]
5'UUUGAAUUAAGAGUAGACACC3'
|o|||x|||||||||||x||x
3'GGAAACUGUAGACGUGGCCACGAAGCUCCCAGACUCAAUUCUCAUCUCUGUGUUUGUAGUAUUAACCCACAAACAAACGUC5' ( -20.50[64.67%] )
>LC-m0036_5p	|ppb015931m|PACid:17664546	|location[2095,2117]
5'GAGCGAGGAUUGCGGAUCAGGUU3'
|x||x||||||||||||||||o|
3'AGUGCUCAAAACCCCUGCGGGCCUGGCACUCACGGUCCUAACGCCUAGUCCGACUGAUGCCAGAGGACUUAGGACGGUCAAAC5' ( -39.50[83.86%] )
>LC-m0037_3p	|ppa009842m|PACid:17660452	|location[1177,1199]
5'UAUAUUUAUAUUUUCCGUCGUUA3'
||||||||||||||||||||||x
3'GCAUCAUCUUGAUAUGCUCUUACUGCAGCUAUAUAAAUAUAAAAGGCAGCAACAUUUAAUUAAAUUAUGCCGCUAUAAAACAU5' ( -28.80[97.96%] )
>LC-m0038_5p	|ppa005679m|PACid:17651251	|location[7,27]
5'GGAUUGUUUAGUGUGCGGAUU3'
|||x|||o||||o||||||||
3'ACACAAAGCAUGCAGUUGAAAAACCGCGCACCUUACAGAUCAUACGCCUAAAAAAAC5' ( -31.70[86.38%] )
>LC-m0040_3p	|ppa012437m|PACid:17648072	|location[161,180]
5'AAAGACUAAAAUACCCUUGA3'
|||||||||||xxx|||||x
3'ACGCCUCUAACUUCUCCUCCACCUCCACCUUUUCUGAUUUUCCAGGAACAAUGACGCCAACCCUCGUAGCAGAUCCUCGU5' ( -17.40[60.84%] )
>LC-m0040_3p	|ppa013211m|PACid:17655878	|location[447,466]
5'AAAGACUAAAAUACCCUUGA3'
|x|||||x|||||||||oo|
3'UGAAAUUUUUGAUCGGUUUUUGAGUCAAUUUAUCUGAGUUUAUGGGAGUUAUAAAUUUGAGUGUAUUUUGGAUUCUUCCU5' ( -21.30[74.48%] )
>LC-m0040_3p	|ppa017834m|PACid:17641445	|location[71,90]
5'AAAGACUAAAAUACCCUUGA3'
||||||||||||||||||o|
3'GAAGUGGUGGGAGUGUUUGGAUCUUUUAUCUUUCUGAUUUUAUGGGAAUUUUAUAUACCUUUUAACUUACCACAAUUUCA5' ( -26.30[92.28%] )
>LC-m0041_3p	|ppa004159m|PACid:17655917	|location[661,681]
5'ACAGGCAGUCUCCUUGGCUAC3'
x||||||||||||ox||x|||
3'AAUAGUAGUGUCAGUUUGUACUCGAGGUUCAGUCCGUCAGAGGGUCCCAUGGAGGAUUCUUCGACGUUUUACGGGGUAUAU5' ( -31.70[74.41%] )
>LC-m0041_3p	|ppa002300m|PACid:17662624	|location[295,315]
5'ACAGGCAGUCUCCUUGGCUAC3'
||||x||||||x|||||||xx
3'AGAAGCCGGUGGGAACUUCGUUGACUGACCUGUCGGUCAGAAGAACCGACCCAUGUACGAUAAUGUGCGGGUGGUAGUCGG5' ( -28.20[65.73%] )
>LC-m0045_5p	|ppa010376m|PACid:17643704	|location[654,673]
5'AGGGAGCCACUAGGAGUCAU3'
||||||||||||||x|xxx|
3'CGUGACGGUGAGUGAUCCUUGGAGUUCAAUUCCCUCGGUGAUCCACCCAAACCUCACAGUUUUUGACGAGGUAUACGAGA5' ( -30.10[74.14%] )
>LC-m0045_5p	|ppa001786m|PACid:17643860	|location[2332,2351]
5'AGGGAGCCACUAGGAGUCAU3'
||o||o||||||x|x|||||
3'UCGACGUGGCGACCUUAUCACGGGAGACUGUCUCUUGGUGAUACCCAGUAGCGUUAGAGUUUAGAUUAUAUAUGUAGCGG5' ( -27.10[65.62%] )
>LC-m0045_5p	|ppa020979m|PACid:17651121	|location[856,875]
5'AGGGAGCCACUAGGAGUCAU3'
|o|o||||||||||||||x|
3'AAUAUUCUUCGGUGAUCCUCAGAAAAGAGAGAAGAGUCUAAAUCCUCGAGGAUC5' ( -34.50[83.74%] )
>LC-m0045_5p	|ppa001343m|PACid:17656535	|location[958,977]
5'AGGGAGCCACUAGGAGUCAU3'
||ox|||||||||||ox|||
3'UACCUUGGUGGUGGGAGUGUUCCAGCCUAUUCUAUCGGUGAUCCUUCGUAGAGUCGAGAAUGUUUUGAACGUCUACCUCC5' ( -24.70[60.69%] )
>LC-m0045_5p	|ppa001405m|PACid:17645693	|location[984,1003]
5'AGGGAGCCACUAGGAGUCAU3'
|||x||||||||||xox|||
3'UAACUUGGUGGGGGAAGUGUCCCAGCAUACUCCAUCGGUGAUCCGUCGUAAAGACGAGAUUGUUUUACGACGUGACCUCC5' ( -25.00[61.58%] )
>LC-m0045_5p	|ppa027073m|PACid:17652287	|location[136,155]
5'AGGGAGCCACUAGGAGUCAU3'
|x||||||||||||x|||xx
3'UGGUAUCUAGGUUGCUACCCGUACAAACGUUACCUCGGUGAUCCACAGCCUCGUCUACGCCGCCACCAUCGACUCCCCCU5' ( -31.40[77.53%] )
>LC-m0046_5p	|ppa004340m|PACid:17662620	|location[1165,1185]
5'UUCCACAGCUUUCUUGAACGU3'
x||||||||||||||x||x|x
3'UUACCUCUGGUUAACUAAGUUAAAGACCUCUAGGUGUCGAAAGAAGUUUCCGCAACAGGGUAUGAAGAAAACGAGGUAUUA5' ( -25.10[70.11%] )
>LC-m0046_5p	|ppa005059m|PACid:17642522	|location[1084,1104]
5'UUCCACAGCUUUCUUGAACGU3'
|||||||||||o|o||||x||
3'ACCAUAUUCUAUUGGAAGUAUAAGUUGUAGAAGGUGUCGAAGGGACUUUCAUUUUCUAUUCUACCUUCGUUGAGAUUCACA5' ( -29.40[81.89%] )
>LC-m0046_5p	|ppb017585m|PACid:17644389	|location[91,111]
5'UUCCACAGCUUUCUUGAACGU3'
o|||x|||||||||||||xo|
3'ACGGUGGAGUCUAAGUGUGUCUUGUCUAUCGAGGAGUCGAAAGAACUUCUAGGGAGAGGAGGAGAAACUCUUCCAGUGGAC5' ( -24.20[67.60%] )
>LC-m0048_5p	|ppa022516m|PACid:17658414	|location[2384,2404]
5'AAAUGACAAGUGGCUAGUUUU3'
x|xo|||||||||x|||||||
3'UUGUUCCAAGAAACUACAGGACCAGGUCUCGUAGCUGUUCACCCAUCAAAAGAACUUUCACCACGGCGCGGGUAAGUCGUU5' ( -22.30[70.79%] )
>LC-m0048_5p	|ppa003376m|PACid:17640837	|location[1852,1872]
5'AAAUGACAAGUGGCUAGUUUU3'
||x||||||||||x||o|||x
3'GUUUUUUCAGUCGAAGUGAACGGUAGUUCUUUAACUGUUCACCUAUUAAACACGAUCAGAGGGACGGCUCUGAGCAAAGUA5' ( -21.90[69.75%] )
>LC-m0048_5p	|ppa016593m|PACid:17643433	|location[2612,2632]
5'AAAUGACAAGUGGCUAGUUUU3'
x|||o||||||x|||x|||||
3'CUAGGAAUUAAAAGUAGAGGUCAAGUCGGGGUUAUUGUUCAGCGAACAAAAAAGAUCUUUGGAAAAGUCAAAGUAAGAGAU5' ( -20.30[63.44%] )
>LC-m0049_3p	|ppa005104m|PACid:17643812	|location[36,56]
5'UGAAGGAAGAGAUAGAAGCGC3'
x|||||||||||x|||||x|x
3'UCUCCCUCCCACUAAAACCUCCUCUCCCAAUCUUCCUUCUCUCUCUUCUCUCUCCAAUCUCACUCUUCCCUGAACCCUAAC5' ( -24.40[63.05%] )
>LC-m0049_3p	|ppa011173m|PACid:17659923	|location[400,420]
5'UGAAGGAAGAGAUAGAAGCGC3'
||||o|||||||o|||x|x||
3'UUCGUCGUCGUCGUCGUCGACCUCGUCCGUACUUUCUUCUCUGUCUCCACGGCCACCCUUACAUUUGUCCGUUUCUCCCUU5' ( -26.00[68.06%] )
>LC-m0049_3p	|ppa000071m|PACid:17641456	|location[5355,5375]
5'UGAAGGAAGAGAUAGAAGCGC3'
|oxx||||||||x||||||||
3'GACCGGUGUAAAUCUACCAUGUGUUAAGGUAUAACCUUCUCUUUCUUCGCGUCUCGUUCUUGUUAGAGGGUUUUGGCAGGG5' ( -28.60[74.87%] )
>LC-m0049_3p	|ppa003608m|PACid:17659190	|location[62,82]
5'UGAAGGAAGAGAUAGAAGCGC3'
x|||||||||||x|||||x|x
3'UAGCGUGAGACGGGCACUCCGUAACAAACCCCUUCCUUCUCUCUCUUCACCACCACCACCUCGCUUCCGGUUACUAGCAAC5' ( -24.60[64.23%] )
>LC-m0049_3p	|ppa001536m|PACid:17651855	|location[1342,1362]
5'UGAAGGAAGAGAUAGAAGCGC3'
||||o||x||||||x|x||||
3'GAAUACCUAUAGCCGUCUGACUAAUAGUCAACUUUCUCCUCUAUGUCCGCGACUUAGGUGUUAGACGAGGAAGGAGAAGAG5' ( -23.60[61.14%] )
>LC-m0049_3p	|ppa006916m|PACid:17665064	|location[1292,1312]
5'UGAAGGAAGAGAUAGAAGCGC3'
||x|||x|||||x||||||o|
3'AGACUGAAGCUUUCCUCUAAUAACUGGUUGACGUCCGUCUCUCUCUUCGUGUAUAAAAUGAGAACUCCGAAAAGGGUGAAG5' ( -23.60[61.46%] )
>LC-m0049_3p	|ppa025514m|PACid:17668420	|location[4,24]
5'UGAAGGAAGAGAUAGAAGCGC3'
x||||||||||x||o||||o|
3'GUCUUUCUUGUUUUCUUGACCAUCUUCGUUCCUUCCUUCUCAAUUUUCGUGGUA5' ( -27.70[72.51%] )
>LC-m0049_3p	|ppb015337m|PACid:17644827	|location[24,44]
5'UGAAGGAAGAGAUAGAAGCGC3'
x|||||||||||xx||||x||
3'CGUUACUGUCUCUUCCCGUCCUCGUCCUUCUCUUCCUUCUCUUCCUUCUCGUCUACUCCCUCUUGUUUUCGGUA5' ( -26.10[68.50%] )
>LC-m0049_3p	|ppa003474m|PACid:17646994	|location[12,32]
5'UGAAGGAAGAGAUAGAAGCGC3'
x|||||||||||x|||||x|x
3'UCGUCACUUUUCAACAUCUCUUCUCUUUCCUCUUCCUUCUCUCUCUUCCCAUCAAAACCGUA5' ( -24.60[64.57%] )
>LC-m0049_3p	|ppa009980m|PACid:17667059	|location[177,197]
5'UGAAGGAAGAGAUAGAAGCGC3'
|||||ox||||x||||||||x
3'UCGUUUUCUCCACGCCGCUACCUCCACUUCACUUCUCUCUCGAUCUUCGCCAAGAACCUUCUUACCCUCUCUUAGAACUGC5' ( -25.90[67.62%] )
>LC-m0049_3p	|ppa013385m|PACid:17658910	|location[40,60]
5'UGAAGGAAGAGAUAGAAGCGC3'
||||||x|||||x||||||xx
3'CGAGUUCAAAUGUUUCUAUUUCUCACACACACUUCCAUCUCUCUCUUCGAAUAUUUUGCUCCCUUAUUGGCUAGCAACCGA5' ( -25.70[67.45%] )
>LC-m0049_3p	|ppa016222m|PACid:17640567	|location[721,741]
5'UGAAGGAAGAGAUAGAAGCGC3'
x|||||||||||x||||x|x|
3'CCAUCAACACCACCACCAUUAACCGUAACUUCUUCCUUCUCUCUCUUAGGGUCGACACCUUGGUCGUCGUAUUCCGACUAC5' ( -23.30[60.99%] )
>LC-m0050_5p	|ppa015104m|PACid:17640678	|location[636,656]
5'UCAUUGUACACAGAUUGGGCA3'
|||||||||||||||||||||
3'GAGAACACCUUUACUCAACAAUGUAAAACCAGUAACAUGUGUCUAACCCGUUUUCGUCAGAACGGGUUGGGAGGGUAGGGA5' ( -37.00[100.00%] )
>LC-m0050_5p	|ppa018378m|PACid:17647994	|location[669,689]
5'UCAUUGUACACAGAUUGGGCA3'
|||||||||||||||||||||
3'GAGAACACCUUUACUCAACAAUGUAAAACCAGUAACAUGUGUCUAACCCGUUUUCGACAGAACGGGUUGGGAGGGUAGGGA5' ( -37.00[100.00%] )
>LC-m0050_5p	|ppa020993m|PACid:17641341	|location[633,653]
5'UCAUUGUACACAGAUUGGGCA3'
|||||||||||x||o|x|||x
3'AAAAACAACUUUAUGAGUAGCUAUCGUGGAAGUAACAUGUGACUGAACCGGUUUCAACAGAAAGGGUCAGGACCGUAAGGG5' ( -25.40[68.10%] )
>LC-m0050_5p	|ppa027225m|PACid:17654029	|location[633,653]
5'UCAUUGUACACAGAUUGGGCA3'
|||||||||||x||o|x|||x
3'GAAAAAAGUUUUAUGAAAUAAUGACUUAAUAGUAACAUGUGACUGAACCGGUUUCAACAGAAAGGGUCGGGACGGUAAGGG5' ( -25.20[67.92%] )
>LC-m0050_5p	|ppa1027210m|PACid:17642559	|location[633,653]
5'UCAUUGUACACAGAUUGGGCA3'
||||||||x|||||o|x|||x
3'AAACCUAGUUUUAUGGGAAAAUAUCUUAAUAGUAACAUAUGUCUGAACCGGUUUCAACAGAAAGGAUCCGGACGGUAAGGG5' ( -24.50[66.04%] )
>LC-m0050_5p	|ppa006059m|PACid:17651430	|location[272,292]
5'UCAUUGUACACAGAUUGGGCA3'
||x|||||x||||||||o|||
3'UAUCGGCUCCUUUAGAUAGGAGGUAUCGAAAGGAACAUCUGUCUAACUCGUUGGUUAGCAGUAGGCUGUGUAGUGAUCGUG5' ( -24.00[64.34%] )
>LC-m0053_3p	|ppa002101m|PACid:17645127	|location[712,732]
5'UCACUUUGAUCGAAAUAGAAC3'
o||x|x|||||||||||o|||
3'GUUGGUGUUGUUUUGAUAGGUACGUGCAGCGGUUAUACUAGCUUUAUUUUGAAGCAAGAAUCUGGAACCGAGAUAUAUAGG5' ( -19.70[62.94%] )
>LC-m0053_3p	|ppa009101m|PACid:17662077	|location[888,908]
5'UCACUUUGAUCGAAAUAGAAC3'
|||x|||||||o||||||x|x
3'UUGUAUAUAUACUUGAUCUUCAGACGUUGAAGUCAAACUAGUUUUAUCGUCGGACAUCCCGGAGGUAAACCAUCUUCUCGG5' ( -19.10[60.83%] )
>LC-m0053_3p	|ppa009248m|PACid:17656684	|location[852,872]
5'UCACUUUGAUCGAAAUAGAAC3'
o||||||||||oxx|||||||
3'GUAUGUAAAAGUUAUUACCUUCUUGACAUAGGUGAAACUAGUAGUAUCUUGAACCUGGUAUUGUAGUGUGGUGGUAUGAAA5' ( -23.80[75.32%] )
>LC-m0054_5p	|ppa015442m|PACid:17641271	|location[740,762]
5'UGACGUCAGCGGCUGAUUUUCAA3'
||||||||||||x|x||o||||x
3'GGUGCAGUCGUAGAAGAAGCUAAGGUCACAACUGCAGUCGCCAAGUAGAAGUAACGGGAACCAGUUCCCAGGCUACCCUAUUU5' ( -31.50[74.64%] )
>LC-m0057_3p	|ppb013742m|PACid:17654509	|location[7,28]
5'CGAAUUAUUUUUCGUCGCGCAU3'
||||oxx||||||||||||||x
3'GCUGUGAUGAUGUUAAAUGAUAAACGCGCUGCUUGUAAAAAAGCAGCGCGUUUUUCGU5' ( -27.70[81.23%] )
>LC-m0059_3p	|ppb022735m|PACid:17643329	|location[387,409]
5'GAUGAUCUAUGAAUGAAGACUUA3'
|||||||||||||||||o||oox
3'CUUUAAGACUAAACAGAUUAAAAAACAUUCCUACUAGAUACUUACUUUUGGGAUAUUCUAGUAUACCACUUAGGAGACGUUUA5' ( -31.80[90.08%] )
>LC-m0060_5p	|ppa010552m|PACid:17664768	|location[1002,1022]
5'UCCAGUGGAAGGUGAGUGCUG3'
||||||||x||o||xo|||||
3'UGAGAGUAAAAACCGUUACGUAUUCUGUAAAGGUCACCAUCUACCUACGACUCUUUACGUUUCCUAGUCCUAUACGUCAGC5' ( -30.10[69.68%] )
>LC-m0061_3p	|ppa002329m|PACid:17656919	|location[567,587]
5'UUUGCAAGUAGAAAGGAUGCC3'
|||x||||o|||x|||||x||
3'CCGACAUUUAAACAGCAUGGAGUAGACUACAAAAGUUCGUCUGUCCUAGGGUAAAACAAACGGGGAGGUACCGUCUCAACC5' ( -21.80[60.89%] )
>LC-m0062_3p	|ppa003756m|PACid:17666833	|location[1114,1134]
5'UUCAAAGGGUACAUCCACAGU3'
x||||||o|||||||xx||||
3'UAGGGACAGUUUCAACAGCGGUGACACCCCUAGUUUCUCAUGUAGUGGUCAACGUUCGAGCUUUGUUUAUGUUCGUUUUCU5' ( -25.30[68.56%] )
>LC-m0062_3p	|ppa015529m|PACid:17659782	|location[805,825]
5'UUCAAAGGGUACAUCCACAGU3'
o|||||o|||||||||x||x|
3'CCGAAGAACGAAGUUGUGGAGUAUGGUUUCGAGUUUUCCAUGUAGGGGUGAACCGUGGGAAAAGUGACACAGGGGUAUAGG5' ( -25.60[69.38%] )
>LC-m0062_3p	|ppa005180m|PACid:17662721	|location[244,264]
5'UUCAAAGGGUACAUCCACAGU3'
|||||||||||||||||||||
3'UAGUAUACGUCGGAAGUUCAACAGUUAAAAAAGUUUCCCAUGUAGGUGUCAACGGAGUCGUGGAAGACCGUUCUUCGGUCC5' ( -37.20[100.00%] )
>LC-m0062_3p	|ppa014843m|PACid:17652815	|location[229,249]
5'UUCAAAGGGUACAUCCACAGU3'
|||||||||||xx||||||||
3'AUGUAUACCGGUUUCCAUAUACAGGUAAAAAAGUUUCCCAUACAGGUGUCAACGGAGUCGUGGAAGACCGUUCUUGGGUCU5' ( -29.50[79.30%] )
>LC-m0062_3p	|ppa025376m|PACid:17653751	|location[238,258]
5'UUCAAAGGGUACAUCCACAGU3'
|||||||||||xx||||||||
3'CAGUAUACGUUAGAACUUCAACAGGUAAAAAAGUUUCCCAUACAGGUGUCAACGGAGUCGUGGAAGACCGUUCUUGGGUCU5' ( -29.50[79.30%] )
>LC-m0063_5p	|ppa019548m|PACid:17643327	|location[1104,1126]
5'AAAGGAUUUUGACUUGCAGAUUA3'
||||o||x|||||||x||||||x
3'AUGAACUGUUGUACAAAACAUACAAAAACUUUUCUUACAACUGAAAGUCUAAGAGGAACCCUAGUGUAACUCUUCCUUCCGGG5' ( -20.30[60.06%] )
>LC-m0063_5p	|ppa008486m|PACid:17655794	|location[202,224]
5'AAAGGAUUUUGACUUGCAGAUUA3'
||||||||o||||||x|xo||||
3'CUUCUCGACCUAACCGUCCCGUCUUAAGUCUUUCCUAAGACUGAAAGGUUAAUACAAAAGCGUAAUACCCGACGUGAACAAAA5' ( -21.90[64.79%] )
>LC-m0064_5p	|ppa019765m|PACid:17655115	|location[134,154]
5'GGAAUGUUGUCUGGCUCGAGG3'
o||x||||||||||||||xx|
3'AGUAUGGAGCUGGUCAGAAACUUAGUAGUCUCUAACAACAGACCGAGCAACCAAGACAGAGUCGUCUACUACUUCGUUUGA5' ( -29.60[70.14%] )
>LC-m0064_5p	|ppa000948m|PACid:17648147	|location[2175,2195]
5'GGAAUGUUGUCUGGCUCGAGG3'
ox||||||||||||||x||o|
3'UUAUCUCGUCCGUUAUGUCUUCGUUCAACAUAUUACAACAGACCGACCUUCCUCCUACCGUCCCGGCGAGCUGACGAUUCG5' ( -27.70[64.27%] )
>LC-m0064_5p	|ppa023304m|PACid:17651862	|location[134,154]
5'GGAAUGUUGUCUGGCUCGAGG3'
o||x||||||||||||||xx|
3'AGUAUGGAGCUGGUCAGAAACUUAGUAGUCUCUAACAACAGACCGAGCAACCAAGACAGAGUCGUCUACUACUUCGUUUGA5' ( -29.60[70.14%] )
>LC-m0064_5p	|ppa019730m|PACid:17660625	|location[807,827]
5'GGAAUGUUGUCUGGCUCGAGG3'
xx||||||||||||x|||||x
3'UCGUAAAGGUUUAACAUGUUGAGUUAUAUAGGUUACAACAGACCCAGCUCGAGAAGGUACUAGUUACGACGUAUAAGGAGU5' ( -27.60[63.74%] )
>LC-m0065_5p	|ppa000803m|PACid:17664526	|location[907,926]
5'GCAGCAUCACCAAGAUUCAC3'
o|||xx||||||||||||x|
3'GCGAAACUAAGGUCCGCCUAGACUAUUGGUUGUCAAAGUGGUUCUAAGAGAGGGGAAAGCCUCCUAUAUGCUCGACGUUG5' ( -24.30[64.46%] )
>LC-m0065_5p	|ppa002810m|PACid:17642073	|location[1503,1522]
5'GCAGCAUCACCAAGAUUCAC3'
||||||o||||||x|||x|x
3'UGUAAGUCUUCCAUUCGGGGUUAUCCCGAUCGUCGUGGUGGUUGUAACUAGUUUCACCGUAUCAUAAACUCCGGUUUCUA5' ( -26.00[69.33%] )
>LC-m0065_5p	|ppa006750m|PACid:17646981	|location[539,558]
5'GCAGCAUCACCAAGAUUCAC3'
o|||||o||||x|||||||x
3'UAGAGGUACCUACUAAAGGGUUGGGUACGUUGUCGUGGUGGAUCUAAGUUUAGUCACAGUUGUGCCUAUCCAAAAAAGUC5' ( -28.30[75.47%] )
>LC-m0065_5p	|ppa009067m|PACid:17657150	|location[724,743]
5'GCAGCAUCACCAAGAUUCAC3'
|||o||||x||||||||x||
3'AACGUGUUGGAGGGUAACGAGGUACGGACUCGUUGUAGGGGUUCUAACUGUUCCUCUCACGGACCCGUUCCUAGUUGACC5' ( -24.20[64.53%] )
>LC-m0065_5p	|ppb021076m|PACid:17663468	|location[379,398]
5'GCAGCAUCACCAAGAUUCAC3'
x|||||||||||xx||o|||
3'CUACUUUUGGGUACGUCUAUGUUCCUUGGUAGUCGUAGUGGUCAUAGGUGGGUUGAUAUAGGGUGAAGGAAAGAGUGAGG5' ( -26.70[71.20%] )
>LC-m0065_5p	|ppa000214m|PACid:17648084	|location[592,611]
5'GCAGCAUCACCAAGAUUCAC3'
||||xx||||||||xx||||
3'AAACUGGAACUGUGGGGGGAGUAUAAGGUUCGUCAGAGUGGUUCCCAGUGUAACAGAGGACGUAGAGAUGAUCAUGAUGA5' ( -24.40[65.07%] )
>LC-m0065_5p	|ppa007415m|PACid:17654704	|location[502,521]
5'GCAGCAUCACCAAGAUUCAC3'
||||||x|||||||x|||xx
3'CUCGGCGGCGGUUCUUGGCCGGGUCGUCGUCGUCGUCGUGGUUCGAAGGUCGGGAGCAAUUUUCGCAAUUUAAGACUUCG5' ( -25.70[67.99%] )
>LC-m0065_5p	|ppa009756m|PACid:17654705	|location[502,521]
5'GCAGCAUCACCAAGAUUCAC3'
||||||x|||||||x|||xx
3'CUCGGCGGCGGUUCUUGGCCGGGUCGUCGUCGUCGUCGUGGUUCGAAGGUCGGGAGCAAUUUUCGCAAUUUAAGACUUCG5' ( -25.70[67.99%] )
>LC-m0065_5p	|ppa023697m|PACid:17643709	|location[1,20]
5'GCAGCAUCACCAAGAUUCAC3'
|xx||||||||||||o|||x
3'CUAACCGAUCUGAGGUAGAAUAGAAACGACCCCCGUAGUGGUUCUGAGUA5' ( -27.90[75.20%] )
>LC-m0065_5p	|ppa003721m|PACid:17643121	|location[1456,1475]
5'GCAGCAUCACCAAGAUUCAC3'
x|x||||||||||||||xx|
3'AGGGUUAAUCACAAAAAAGACAGUAGUUCCAGACGUAGUGGUUCUAAUAGGUAGUACAGUAGUGUCUACCGCGCUUCUAG5' ( -23.70[63.88%] )
>LC-m0065_5p	|ppa006644m|PACid:17643700	|location[1106,1125]
5'GCAGCAUCACCAAGAUUCAC3'
|||x||||x|||||||o||x
3'AAGUCGUAACGGACCUCAUUGAGGGUUGGUCGUGGUAGAGGUUCUAGGUCCUUGAAGUGUCGUAGAUUAUCGGCCAGUAG5' ( -25.70[67.99%] )
>LC-m0065_5p	|ppa012379m|PACid:17665012	|location[356,375]
5'GCAGCAUCACCAAGAUUCAC3'
|||||x|||||||xx|||x|
3'UACUGUUCGUUUAGUCGUACGUUUAAGAGUCGUCGAAGUGGUUAAAAGAGGAAGCCUAGGGGUUGUUGGUGAACCCAAAA5' ( -23.70[63.20%] )
>LC-m0065_5p	|ppa013829m|PACid:17659972	|location[304,323]
5'GCAGCAUCACCAAGAUUCAC3'
||||||||||||||||ox|x
3'AACUAACGCAAGAACUGUUAGAAAAACCUCCGUCGUAGUGGUUCUAGUUUACGGCGUAUAUAGUCGGUUGGACUAUUCCA5' ( -30.60[82.04%] )
>LC-m0065_5p	|ppa022250m|PACid:17645438	|location[850,869]
5'GCAGCAUCACCAAGAUUCAC3'
o||||||||||||xx|||x|
3'GGUAAAGAGAGGUAGAGUACAUUUUGUCUAUGUCGUAGUGGUUAAAAGGGUAAUCUCGUCUCUGGUACAUAGUCUGAUCA5' ( -25.90[68.16%] )
>LC-m0065_5p	|ppa025975m|PACid:17648761	|location[229,248]
5'GCAGCAUCACCAAGAUUCAC3'
||x|||||||||xx|||||x
3'UAAAAAAGUUGAACUGCCUAGUGAACUAGUCGGCGUAGUGGUCGUAAGUAUCGAGCAUCUCGAGAUUCGUCAGAUAGAGA5' ( -23.60[62.93%] )
>LC-m0065_5p	|ppa013907m|PACid:17662133	|location[426,445]
5'GCAGCAUCACCAAGAUUCAC3'
x||o|||||||||||x|||x
3'AGUAGUUAAAGAUGUCUUCAUUGUUAAAGAAGUUGUAGUGGUUCUUAGUAUAAGUUCACAACUAGUAUUCGUACCUCAAA5' ( -26.70[70.26%] )
>LC-m0065_5p	|ppa014009m|PACid:17662134	|location[426,445]
5'GCAGCAUCACCAAGAUUCAC3'
x||o|||||||||||x|||x
3'AGUAGUUAAAGAUGUCUUCAUUGUUAAAGAAGUUGUAGUGGUUCUUAGUAUAAGUUCACAACUAGUAUUCGUACCUCAAA5' ( -26.70[70.26%] )
>LC-m0065_5p	|ppa014013m|PACid:17662135	|location[631,650]
5'GCAGCAUCACCAAGAUUCAC3'
x||o|||||||||||x|||x
3'AGUAGUUAAAGAUGUCUUCAUUGUUAAAGAAGUUGUAGUGGUUCUUAGUAUAAGUUCACAACUAGUAUUCGUACCUCAAA5' ( -26.70[70.26%] )
>LC-m0065_5p	|ppa002642m|PACid:17651285	|location[1177,1196]
5'GCAGCAUCACCAAGAUUCAC3'
x|||x||||||||||||||x
3'AGUCGAUCUUGUAAUCAGUGUAAUUGUUUGAGUCCUAGUGGUUCUAAGUAGGAGUGGCGCUUAUGUACAAAGUUCCUGAG5' ( -25.70[67.63%] )
>LC-m0065_5p	|ppa012082m|PACid:17651108	|location[338,357]
5'GCAGCAUCACCAAGAUUCAC3'
||||||||||||||xox|x|
3'UUGACAGUGCUCUCGGAGGGUGAAGCCCAACGUCGUAGUGGUUCGGUGGGUGAACUCGGUAACGGAGUUAGUACUCUUGA5' ( -31.50[82.89%] )
>LC-m0065_5p	|ppa014253m|PACid:17643544	|location[588,607]
5'GCAGCAUCACCAAGAUUCAC3'
|||ox||||||||x|||||x
3'UUGUUCUUAACUACAUUUCAGAAUGUUUCUCGUUAUAGUGGUUGUAAGUACUAGUAAAUUCUAGUUCUAAAUCAAGUUGU5' ( -22.80[60.32%] )
>LC-m0065_5p	|ppa014333m|PACid:17653639	|location[428,447]
5'GCAGCAUCACCAAGAUUCAC3'
x||||x|||||||||x|||x
3'GUCUGACGACGGCAAAGACUUCUAGAAGGAGGUCGAAGUGGUUCUUAGUCCGAACGACUACCUUCCAUAGACCGAAUAUC5' ( -24.80[64.75%] )
>LC-m0065_5p	|ppa025606m|PACid:17656954	|location[391,410]
5'GCAGCAUCACCAAGAUUCAC3'
||||||o||||||x|||x|x
3'UGUAAGUCUUCUAUUCGGGGUUAUCCCGAUCGUCGUGGUGGUUGUAACUAGUUUCACCUUGUCAUAAACUCCGGUUUCUA5' ( -26.00[69.33%] )
>LC-m0065_5p	|ppa013901m|PACid:17653716	|location[164,183]
5'GCAGCAUCACCAAGAUUCAC3'
x||o|||||||||||x|||x
3'AGUAGUUAAAGAUAUCUUCAUUGUUGAAGAAGUUGUAGUGGUUCUUAGUAUAAAUUCACAACUAGUAUUCGUACCUCAAA5' ( -26.70[70.26%] )
>LC-m0065_5p	|ppa000059m|PACid:17643100	|location[1854,1873]
5'GCAGCAUCACCAAGAUUCAC3'
|||x|||||||||||xxx||
3'GUCUAAAUAAGAAAACUUACUCUUCGCAGACGUAGUAGUGGUUCUUCUUGACACAGAAACUGUUGAGUUUCAGUAAUCUU5' ( -23.00[60.21%] )
>LC-m0066_5p	|ppa004555m|PACid:17659130	|location[831,851]
5'GGAGCAUCAUCAAGAUUCACA3'
xx|||||||||||o|x|||||
3'UUCUCUCGUUCCAGUCGUCGGUAUAAAUAUAGUCGUAGUAGUUUUUAGUGUUCCCCACUGAACGGAGGAUCAAGUUCACUU5' ( -25.40[67.73%] )
>LC-m0066_5p	|ppa006321m|PACid:17668096	|location[108,128]
5'GGAGCAUCAUCAAGAUUCACA3'
|o|||||||||||o||o||x|
3'AAUUGAUGCUCGACUCUACUUCUUCUUAGUCUUCGUAGUAGUUUUAGGUUUCGGUCAUUAGCUCUUUCGUAUCACGCGAAC5' ( -27.70[74.06%] )
>LC-m0066_5p	|ppa003551m|PACid:17665334	|location[842,862]
5'GGAGCAUCAUCAAGAUUCACA3'
x||||x|||||||x|x|||||
3'UAGACCCCUACUUUAGGAUCUACACGGGGUACUCGGAGUAGUUGUUAGUGUCCCUAAGGUGCUCUUACCGUGUUAACCCAA5' ( -23.00[61.50%] )
>LC-m0066_5p	|ppa008114m|PACid:17649251	|location[1040,1060]
5'GGAGCAUCAUCAAGAUUCACA3'
o||||||||||||xx|||||x
3'AUCUUUUGUUGUCGGUUCGGGGUACGUCUUUCUCGUAGUAGUUGAAAGUGAAGGUUUAACGAAUACCUACAGGACUUUCCU5' ( -27.10[72.07%] )
>LC-m0066_5p	|ppa013309m|PACid:17640825	|location[371,391]
5'GGAGCAUCAUCAAGAUUCACA3'
o|||||||||||||x||xx||
3'GUAAACCUCUCUCUUUGCAAGUCUCUAACUUCUCGUAGUAGUUCGAACGGUCGUCGGUUCCGACGUGUGGGACGGAACAUC5' ( -23.20[62.03%] )
>LC-m0066_5p	|ppa001219m|PACid:17653174	|location[96,116]
5'GGAGCAUCAUCAAGAUUCACA3'
o||o|||||||x|x|||||||
3'AAUAAAACGAAGUUCUCUAUUUUGUCUCGUUCUUGUAGUAGAUAUAAGUGUAGUCACAGAUGUUCUUAAGACACUCCAACU5' ( -23.30[61.97%] )
>LC-m0066_5p	|ppa001992m|PACid:17652882	|location[573,593]
5'GGAGCAUCAUCAAGAUUCACA3'
x||||x||||||||x||||||
3'CGCUGGUGUUAUCGUAAACUUUCUAGAACUACUCGCAGUAGUUCAAAGUGUCGGUAAAACCGUUAAAAUACUCUUUCUUGA5' ( -25.70[68.72%] )
>LC-m0066_5p	|ppa011379m|PACid:17660395	|location[720,740]
5'GGAGCAUCAUCAAGAUUCACA3'
|o||||x|||||x||||||||
3'AGUAGUAUUAAUAUUAAAAUAACAUUAAUUCUUCGUCGUAGUGCUAAGUGUAGUGUCGAAGUCAGAAGGGGCGGAGAUAGG5' ( -26.00[69.15%] )
>LC-m0066_5p	|ppa027075m|PACid:17648114	|location[561,581]
5'GGAGCAUCAUCAAGAUUCACA3'
||||x|o||||||o|||||||
3'CAGAAGAAGUGUGGUUGGUGACGUGAUGAACCUCCUGGUAGUUUUAAGUGUUUCGAGACCAUGCGACUCGUGGGAGGAGGC5' ( -28.20[74.21%] )
>LC-m0066_5p	|ppa015133m|PACid:17667614	|location[819,839]
5'GGAGCAUCAUCAAGAUUCACA3'
x||||||||||||ox|||||x
3'CGGAGUUCUGGGUUACGUUAGAGUUCCUCGACUCGUAGUAGUUUGAAGUGGUGUGAAGGUUUCGAGUGUAUUUAAUGACUU5' ( -27.90[73.42%] )
>LC-m0066_5p	|ppa004195m|PACid:17648978	|location[1562,1582]
5'GGAGCAUCAUCAAGAUUCACA3'
o|||||||||||||x||||x|
3'GAUGUUAGAGUCUUUAGUACCUUCUCGUACUCUCGUAGUAGUUCGAAGUUUUCCCUACGAACGUUUUGAUUUUACUGUAAA5' ( -26.30[70.89%] )
>LC-m0066_5p	|ppa008922m|PACid:17647856	|location[660,680]
5'GGAGCAUCAUCAAGAUUCACA3'
oo||||||||||||||o|x||
3'GUAUCCGUAACGUGACAGAGAAAAUUGGAGUUUCGUAGUAGUUCUAGGAGUAGCUACAACACCGGUCUUUAGAGGACCAUC5' ( -27.90[73.23%] )
>LC-m0067_3p	|ppa006419m|PACid:17640862	|location[407,427]
5'AACAAAACUAUAGGAAGACUC3'
||||||x|o||||||x||||x
3'UAUUCGUCGACUGGAUGCUAGUUUCAUCAGUUGUUUAGGUAUCCUACUGAAUAGAAAAGAAUACUCGAACGUAGGAAGUUC5' ( -20.80[65.20%] )
>LC-m0067_3p	|ppa008982m|PACid:17649966	|location[1175,1195]
5'AACAAAACUAUAGGAAGACUC3'
||||x|||o|||||||x||x|
3'CCGUCAACACUCUAUUUAAAAUAUCUUAUGUUGUGUUGGUAUCCUUGUGUGCUCCACUUGAGUUAUAGUAAUUUAGGGAAG5' ( -20.70[64.29%] )
>LC-m0069_5p	|ppa000741m|PACid:17655652	|location[3157,3179]
5'AAAUAGUUAUCAAACGGGCCCUA3'
||||x|||||||||xx|||||||
3'ACUUUUUAUUUUUGACUUUUGACUUUUGACUUUACCAAUAGUUUAACCGGGAUUUACUUCAUUCUCCAUCAACUUCAAAAACC5' ( -24.70[65.17%] )
>LC-m0070_3p	|ppa005527m|PACid:17644520	|location[1877,1896]
5'UCUAGAUCAUCGUGUUACUC3'
|||||||||||o|x||xx||
3'GUGUAUGAAAGGGUCGAGACAAUUUUAAGAAGAUCUAGUAGUAGAAGCAGUAGUAUUCCCCAUUUGUUUCGAGAGUUUUC5' ( -20.30[60.78%] )
>LC-m0070_3p	|ppa000631m|PACid:17666658	|location[2305,2324]
5'UCUAGAUCAUCGUGUUACUC3'
|||||||||||x|x||xx||
3'AGCCGAACUCUUUCCUCGUACACCGGUCGAAGAUCUAGUAGGAAAAAAAGUGAACGGUGAUCUUCAUACCUCAUACAAUA5' ( -20.42[61.14%] )
>LC-m0070_3p	|ppa015605m|PACid:17640433	|location[1162,1181]
5'UCUAGAUCAUCGUGUUACUC3'
||x||||||||o|o||x|||
3'CGUUGAGGGUUCCUCUUCUAUAGUCGGAACAGUUCUAGUAGUAUAAAGAGUAAGUCCUAAAGAACUCCGUAUAUAGCUCG5' ( -20.30[61.33%] )
>LC-m0073_3p	|ppa026908m|PACid:17656743	|location[141,161]
5'UUUGAAUUAAGAGUAGACACC3'
|o|||x|||||||||||x||x
3'GGAAACUGUAGACGUGGCCACGAAGCUCCCAGACUCAAUUCUCAUCUCUGUGUUUGUAGUAUUAACCCACAAACAAACGUC5' ( -20.50[64.67%] )
>LC-m0074_5p	|ppa000467m|PACid:17661235	|location[863,885]
5'GUGGGAAGUGAAAAACAUGGCUA3'
||oo||||||||||x||||||x|
3'UGGUGGGAGUCUUGGACUGGUGUAUAGUGGCAUUCUUCACUUUUGGUACCGUUCUUGGCCUCGCGCCACCCGGACGGUACUUU5' ( -30.30[73.19%] )
>LC-m0074_5p	|ppa005027m|PACid:17666820	|location[1580,1602]
5'GUGGGAAGUGAAAAACAUGGCUA3'
||||x|||||||||x|||||x|x
3'CCUUUAUAAAUAGGAGUAAAGAUAUCACUUCACCGUUCACUUUUAGUACCAACGUCCCCGAAGUUUAACGUCUCGUAUACUAG5' ( -26.50[64.63%] )
>LC-m0074_5p	|ppa005528m|PACid:17666821	|location[1508,1530]
5'GUGGGAAGUGAAAAACAUGGCUA3'
||||x|||||||||x|||||x|x
3'CCUUUAUAAAUAGGAGUAAAGAUAUCACUUCACCGUUCACUUUUAGUACCAACGUCCCCGAAGUUUAACGUCUCGUAUACUAG5' ( -26.50[64.63%] )
>LC-m0074_5p	|ppa014014m|PACid:17668554	|location[1048,1070]
5'GUGGGAAGUGAAAAACAUGGCUA3'
||||||||||||x||x|||o|||
3'ACUCCCCUCCUUUUACAUAUCUUAAAACCACACCCUUCACUUCUUAUACUGAUUCAUAAAUAAAUUUUUUUAAGACUUUUACA5' ( -29.30[70.60%] )
>LC-m0075_5p	|ppa000724m|PACid:17668572	|location[2624,2645]
5'GAAGCGUAGUAGAUUAUGGCAU3'
|||||o||o||||||||||||o
3'CAACUCUUGUGGGUCUUUAUUUCCUUCUGCCUUCGUAUUAUCUAAUACCGUGGGCGAGAUCUAUCACUAAGGUAGGGUAAGA5' ( -34.00[89.95%] )
>LC-m0076_3p	|ppa000435m|PACid:17668087	|location[2072,2094]
5'AAGGUGGUAUGAGAAUGUGGUAA3'
|||||||o|||||x|||x||x||
3'UAAUUCGUAUGAUCUACGUUUAUAGACUCCUUCCACCGUACUCGUACUCCUUUCUUCGACUUAACUUAGGUUUACAUCGUUCA5' ( -27.48[71.01%] )
>LC-m0079_5p	|ppa003136m|PACid:17643333	|location[1335,1355]
5'UGCCUGGCUCCCUGUAUGCCA3'
||||||||||||||o||||||
3'ACCCUAUCUAAUCUAUGUGUCAUAUCUAGAACGGACCGAGGGACGUACGGUCGUCCUUUUCACAAUAUCAAGUUGUUCCUA5' ( -46.30[100.00%] )
>LC-m0079_5p	|ppa002082m|PACid:17645207	|location[1344,1364]
5'UGCCUGGCUCCCUGUAUGCCA3'
||||||||||||||||||||x
3'UCUAGACUAUUUCUAUAAGAUUUAACUCGUACGGACCGAGGGACAUACGGACGUCCUCACAACAGUCCAUCUGUUGUGUUC5' ( -46.30[100%] )
>LC-m0079_5p	|ppa002195m|PACid:17653376	|location[1580,1600]
5'UGCCUGGCUCCCUGUAUGCCA3'
||||||||||||||o||||||
3'UAUAGACUAUUCCUAUCUGGUAUUACUGGUACGGACCGAGGGACGUACGGUCGUCCUCAAAACAGCCCGUCUGUUGGUUUU5' ( -46.10[100.00%] )
>LC-m0079_5p	|ppa002691m|PACid:17640912	|location[2583,2603]
5'UGCCUGGCUCCCUGUAUGCCA3'
||||||x|||||||ox|||x|
3'UAAAUCCACGUUUUGUUAUAGGUCAUUUGGACGGACGGAGGGACGGACGAUCAACCCGUGUUCAGCCCGUUUUGACCAGAG5' ( -33.90[73.22%] )
>LC-m0079_5p	|ppa002710m|PACid:17657536	|location[1272,1292]
5'UGCCUGGCUCCCUGUAUGCCA3'
||||||||||||||||||||x
3'UGUAGGCUACUUCUAUCAAGUUUAACUCGAACGGACCGAGGGACAUACGGGCGACUAUAAAACAGACUAUGUGAUGUAUUC5' ( -46.30[100.00%] )
>LC-m0080_5p	|ppa008065m|PACid:17662475	|location[1058,1078]
5'UAGCCAAGGAUGACUUGCCUG3'
||||||||||||xx||||x||
3'AGUAGGAGAGGAACGCGAAGAGUUUCUUAGAUCGGUUCCUACGAAACGCACGAACUCCGUGACCAUGACGACCUUAGUCCA5' ( -27.30[66.42%] )
>LC-m0080_5p	|ppa011476m|PACid:17641245	|location[661,681]
5'UAGCCAAGGAUGACUUGCCUG3'
|||||||||||||xx||xx||
3'GAGUGAAUCAGUUGAGUCGACUCUCACACAAUCGGUUCCUACUAUACCAACUUCCUCUGUGGGGAGAUCAGGGUGGGUUUA5' ( -28.02[68.34%] )
>LC-m0080_5p	|ppa012173m|PACid:17666161	|location[698,718]
5'UAGCCAAGGAUGACUUGCCUG3'
x|||||||o||||x|||||||
3'GUGUUGUGGGUUAUUAAUGUUUUCAUUGGUUUCGGUUCUUACUAAACGGACUAUAUCUGUAACGUGUCGUCCCAAAGUGGG5' ( -30.30[74.26%] )
>LC-m0081_3p	|ppa009397m|PACid:17656533	|location[1000,1020]
5'UGCCAAAGAAGAGUUGCCCUA3'
ox|||||||||||||||xx||
3'UUUUAGAGGUAUUGUUCGUUCACGUAGGUAGAGGUUUCUUCUCAACGUAAUGGAGAGUCAUAAGAGACAAGUUUGUUCCUU5' ( -27.40[69.90%] )
>LC-m0081_3p	|ppa015730m|PACid:17660744	|location[338,358]
5'UGCCAAAGAAGAGUUGCCCUA3'
x||||||||||x||||x||||
3'UUAGCUUUCUGACUCUUCCUUUGAACAAUUCCGGUUUCUUCACAACCGGAUACUUCGGUAACCUCCCCCACGGUUUCCGGU5' ( -25.70[65.73%] )
>LC-m0081_3p	|ppa003154m|PACid:17650304	|location[866,886]
5'UGCCAAAGAAGAGUUGCCCUA3'
|x||||||||||||o|||||x
3'AUUCGUCGUCGACUAAACUCGUCGAAGUCGAAGGUUUCUUCUCAGCGGGAGCCAUAUUAUAGUCGGUUUCUGCUCUCCGUA5' ( -34.00[86.96%] )
>LC-m0081_3p	|ppa004613m|PACid:17651940	|location[338,358]
5'UGCCAAAGAAGAGUUGCCCUA3'
x||||||||||x||||x||||
3'UUAGCUUUCUGACUCUUCCUUUGAACAAUUCCGGUUUCUUCACAACCGGAUACUUCGGUAACCUCCCCCACGGUUUCCGGU5' ( -25.70[65.73%] )
>LC-m0081_3p	|ppa024435m|PACid:17650881	|location[248,268]
5'UGCCAAAGAAGAGUUGCCCUA3'
xo||||||||||x|||||||x
3'GAAAGAAAGAAGGGUUAAACAGUGGUUCGGUUGGUUUCUUCUGAACGGGACGGUUACACGGUGUUUCACGGUGUGGUAACU5' ( -31.30[79.85%] )
>LC-m0081_3p	|ppa025234m|PACid:17662545	|location[248,268]
5'UGCCAAAGAAGAGUUGCCCUA3'
x|||||||||||||||||||x
3'GAAAAAAGGAUGGUUCAAAUAGAGGUUCGGUCGGUUUCUUCUCAACGGGACGAUCCCAAGGUUUGUUUCGUUGGGGUCAAU5' ( -37.50[95.66%] )
>LC-m0082_3p	|ppa002027m|PACid:17648996	|location[1059,1079]
5'UCAUUUCAGCAAGCAGCGUUA3'
|||||o|||||||x|||||x|
3'ACAUAUAAAACCAUCGGCUAUGUCCACGUUAGUAAGGUCGUUCAUCGCACUGUCAGCGAUUCUAGAUUCAAUCAUAAUAAU5' ( -26.90[74.72%] )
>LC-m0082_3p	|ppa000091m|PACid:17646118	|location[2177,2197]
5'UCAUUUCAGCAAGCAGCGUUA3'
o||||xx|||||||||||||x
3'GAUGUUGUCUUGGAGCUCUAAAGUCUGGUAGGUAAUUUCGUUCGUCGCAACUGUGUUGGCUUGAUACACAGACUAGAACGA5' ( -27.50[75.97%] )
>LC-m0082_3p	|ppa018599m|PACid:17641633	|location[972,992]
5'UCAUUUCAGCAAGCAGCGUUA3'
|xx||o|||||||||||x|||
3'UUGUCUAUCAACUUAGGUUCCGUCAGUGUUAAAAAGGUCGUUCGUCGGAAUGUUAGUGACUACGACUUCGAACAUAAACUU5' ( -26.80[74.44%] )
>LC-m0082_3p	|ppa003439m|PACid:17668154	|location[1305,1325]
5'UCAUUUCAGCAAGCAGCGUUA3'
|||||||x|||||||ox|o||
3'AGUGACGUAACCCGAAGUUUGGUAUGUCGAAGUAAAGACGUUCGUUUCGAUUCCGAAGUACCGGUUCUGGCAAGUAAGGUA5' ( -22.50[62.15%] )
>LC-m0082_3p	|ppa004992m|PACid:17644515	|location[1085,1105]
5'UCAUUUCAGCAAGCAGCGUUA3'
|||||||||||||||||oxo|
3'UCAGAGGGAACCGUUCCAAUGGCCGACUCGAGUAAAGUCGUUCGUCGUUGUCCGGGGAUGGUGCGCCGUUUGGGAAGUUAA5' ( -31.40[86.98%] )
>LC-m0085_3p	|ppa013948m|PACid:17647007	|location[357,379]
5'UCUGGUAGAUAGAGGCUUGCAGA3'
|||x|o|o|||||||||||||||
3'UUUGUUCCAUCAUUUCAUUUUUGACUGUCAAGAACGUUUAUCUCCGAACGUCUUAACGUUACAGGAACUUUGUCUUAAAGCGG5' ( -35.50[79.60%] )
>LC-m0087_3p	|ppa009397m|PACid:17656533	|location[1000,1020]
5'UGCCAAAGAAGAGUUGCCCUA3'
ox|||||||||||||||xx||
3'UUUUAGAGGUAUUGUUCGUUCACGUAGGUAGAGGUUUCUUCUCAACGUAAUGGAGAGUCAUAAGAGACAAGUUUGUUCCUU5' ( -27.40[69.90%] )
>LC-m0087_3p	|ppa015730m|PACid:17660744	|location[338,358]
5'UGCCAAAGAAGAGUUGCCCUA3'
x||||||||||x||||x||||
3'UUAGCUUUCUGACUCUUCCUUUGAACAAUUCCGGUUUCUUCACAACCGGAUACUUCGGUAACCUCCCCCACGGUUUCCGGU5' ( -25.70[65.73%] )
>LC-m0087_3p	|ppa003154m|PACid:17650304	|location[866,886]
5'UGCCAAAGAAGAGUUGCCCUA3'
|x||||||||||||o|||||x
3'AUUCGUCGUCGACUAAACUCGUCGAAGUCGAAGGUUUCUUCUCAGCGGGAGCCAUAUUAUAGUCGGUUUCUGCUCUCCGUA5' ( -34.00[86.96%] )
>LC-m0087_3p	|ppa004613m|PACid:17651940	|location[338,358]
5'UGCCAAAGAAGAGUUGCCCUA3'
x||||||||||x||||x||||
3'UUAGCUUUCUGACUCUUCCUUUGAACAAUUCCGGUUUCUUCACAACCGGAUACUUCGGUAACCUCCCCCACGGUUUCCGGU5' ( -25.70[65.73%] )
>LC-m0087_3p	|ppa024435m|PACid:17650881	|location[248,268]
5'UGCCAAAGAAGAGUUGCCCUA3'
xo||||||||||x|||||||x
3'GAAAGAAAGAAGGGUUAAACAGUGGUUCGGUUGGUUUCUUCUGAACGGGACGGUUACACGGUGUUUCACGGUGUGGUAACU5' ( -31.30[79.85%] )
>LC-m0087_3p	|ppa025234m|PACid:17662545	|location[248,268]
5'UGCCAAAGAAGAGUUGCCCUA3'
x|||||||||||||||||||x
3'GAAAAAAGGAUGGUUCAAAUAGAGGUUCGGUCGGUUUCUUCUCAACGGGACGAUCCCAAGGUUUGUUUCGUUGGGGUCAAU5' ( -37.50[95.66%] )
>LC-m0088_3p	|ppa009397m|PACid:17656533	|location[1000,1020]
5'UGCCAAAGAAGAGUUGCCCUA3'
ox|||||||||||||||xx||
3'UUUUAGAGGUAUUGUUCGUUCACGUAGGUAGAGGUUUCUUCUCAACGUAAUGGAGAGUCAUAAGAGACAAGUUUGUUCCUU5' ( -27.40[69.90%] )
>LC-m0088_3p	|ppa015730m|PACid:17660744	|location[338,358]
5'UGCCAAAGAAGAGUUGCCCUA3'
x||||||||||x||||x||||
3'UUAGCUUUCUGACUCUUCCUUUGAACAAUUCCGGUUUCUUCACAACCGGAUACUUCGGUAACCUCCCCCACGGUUUCCGGU5' ( -25.70[65.73%] )
>LC-m0088_3p	|ppa003154m|PACid:17650304	|location[866,886]
5'UGCCAAAGAAGAGUUGCCCUA3'
|x||||||||||||o|||||x
3'AUUCGUCGUCGACUAAACUCGUCGAAGUCGAAGGUUUCUUCUCAGCGGGAGCCAUAUUAUAGUCGGUUUCUGCUCUCCGUA5' ( -34.00[86.96%] )
>LC-m0088_3p	|ppa004613m|PACid:17651940	|location[338,358]
5'UGCCAAAGAAGAGUUGCCCUA3'
x||||||||||x||||x||||
3'UUAGCUUUCUGACUCUUCCUUUGAACAAUUCCGGUUUCUUCACAACCGGAUACUUCGGUAACCUCCCCCACGGUUUCCGGU5' ( -25.70[65.73%] )
>LC-m0088_3p	|ppa024435m|PACid:17650881	|location[248,268]
5'UGCCAAAGAAGAGUUGCCCUA3'
xo||||||||||x|||||||x
3'GAAAGAAAGAAGGGUUAAACAGUGGUUCGGUUGGUUUCUUCUGAACGGGACGGUUACACGGUGUUUCACGGUGUGGUAACU5' ( -31.30[79.85%] )
>LC-m0088_3p	|ppa025234m|PACid:17662545	|location[248,268]
5'UGCCAAAGAAGAGUUGCCCUA3'
x|||||||||||||||||||x
3'GAAAAAAGGAUGGUUCAAAUAGAGGUUCGGUCGGUUUCUUCUCAACGGGACGAUCCCAAGGUUUGUUUCGUUGGGGUCAAU5' ( -37.50[95.66%] )
>LC-m0089_3p	|ppa009397m|PACid:17656533	|location[1000,1020]
5'UGCCAAAGAAGAGUUGCCCUA3'
ox|||||||||||||||xx||
3'UUUUAGAGGUAUUGUUCGUUCACGUAGGUAGAGGUUUCUUCUCAACGUAAUGGAGAGUCAUAAGAGACAAGUUUGUUCCUU5' ( -27.40[69.90%] )
>LC-m0089_3p	|ppa015730m|PACid:17660744	|location[338,358]
5'UGCCAAAGAAGAGUUGCCCUA3'
x||||||||||x||||x||||
3'UUAGCUUUCUGACUCUUCCUUUGAACAAUUCCGGUUUCUUCACAACCGGAUACUUCGGUAACCUCCCCCACGGUUUCCGGU5' ( -25.70[65.73%] )
>LC-m0089_3p	|ppa003154m|PACid:17650304	|location[866,886]
5'UGCCAAAGAAGAGUUGCCCUA3'
|x||||||||||||o|||||x
3'AUUCGUCGUCGACUAAACUCGUCGAAGUCGAAGGUUUCUUCUCAGCGGGAGCCAUAUUAUAGUCGGUUUCUGCUCUCCGUA5' ( -34.00[86.96%] )
>LC-m0089_3p	|ppa004613m|PACid:17651940	|location[338,358]
5'UGCCAAAGAAGAGUUGCCCUA3'
x||||||||||x||||x||||
3'UUAGCUUUCUGACUCUUCCUUUGAACAAUUCCGGUUUCUUCACAACCGGAUACUUCGGUAACCUCCCCCACGGUUUCCGGU5' ( -25.70[65.73%] )
>LC-m0089_3p	|ppa024435m|PACid:17650881	|location[248,268]
5'UGCCAAAGAAGAGUUGCCCUA3'
xo||||||||||x|||||||x
3'GAAAGAAAGAAGGGUUAAACAGUGGUUCGGUUGGUUUCUUCUGAACGGGACGGUUACACGGUGUUUCACGGUGUGGUAACU5' ( -31.30[79.85%] )
>LC-m0089_3p	|ppa025234m|PACid:17662545	|location[248,268]
5'UGCCAAAGAAGAGUUGCCCUA3'
x|||||||||||||||||||x
3'GAAAAAAGGAUGGUUCAAAUAGAGGUUCGGUCGGUUUCUUCUCAACGGGACGAUCCCAAGGUUUGUUUCGUUGGGGUCAAU5' ( -37.50[95.66%] )
>LC-m0090_5p	|ppa003070m|PACid:17669114	|location[287,309]
5'GUGGUGUUCACAUGUUGGGCUUA3'
|||x|||||||x||||o|||||x
3'CCGGUGUGCACGAGGGUGCAGUGGGUUAUACACAACAAGUGCACAAUCCGAACUUUCAAGCGGUGUGCACGCCCCCGCACAAC5' ( -30.10[68.72%] )
>LC-m0093_3p	|ppa001212m|PACid:17660869	|location[2234,2254]
5'CUACGAACUGAAGACCAAGGA3'
|||||||||||||||||||||
3'CCAAGAACUCUAAACACGUUAGAUGAUGAAGAUGCUUGACUUCUGGUUCCUUCGCUAAGCCUAAAAGGUCUGCACAAUAGG5' ( -38.50[100.00%] )
>LC-m0093_3p	|ppa016635m|PACid:17652588	|location[2237,2257]
5'CUACGAACUGAAGACCAAGGA3'
|||||||||||||||||||||
3'CCAAGAACUCUAAGCACGUUAGAUGAUGAAGAUGCUUGACUUCUGGUUCCUUCGUUCAGCCUAAAAGGUCUGCACAAUAGG5' ( -38.50[100.00%] )
>LC-m0093_3p	|ppa021194m|PACid:17667322	|location[2228,2248]
5'CUACGAACUGAAGACCAAGGA3'
|||||||||||||||||||||
3'CCAAGAACUCUAAGCACGUUACAUGAUGAAGAUGCUUGACUUCUGGUUCCUUCGUUAAGCCUAAAAGGUCUGCACAAUAGG5' ( -38.50[100.00%] )
>LC-m0093_3p	|ppa023373m|PACid:17660545	|location[2210,2230]
5'CUACGAACUGAAGACCAAGGA3'
|||||||||||||||||||||
3'CCAAGAACUCUAAGCACGUUAAAUGAUGAAGAUGCUUGACUUCUGGUUCCUUCGUUGAGCCUAAAAGGUUUCCAUAAAAGG5' ( -38.50[100.00%] )
>LC-m0093_3p	|ppa026312m|PACid:17665093	|location[488,508]
5'CUACGAACUGAAGACCAAGGA3'
|||||||||||||||||||||
3'CCAAGAACUCUAAGCACGUUAGAUGAUGAAGAUGCUUGACUUCUGGUUCCUUCGUUCAGCCUAAAAGGUCUGCACAAUAGG5' ( -38.50[100.00%] )
>LC-m0094_3p	|ppa004392m|PACid:17642635	|location[12,32]
5'UAAGAGGACAAAAGAUGAGUG3'
o|||||o|x|||||||||o||
3'UACCAACCACCACGGUAACUCCAGAGACCCGUUCUCUUUUUUUCUACUUACUAAAACCGGUA5' ( -22.50[66.18%] )
>LC-m0094_3p	|ppa014531m|PACid:17665679	|location[417,437]
5'UAAGAGGACAAAAGAUGAGUG3'
|||ox||||||||||||xx||
3'AGAAUUGAAGUGUGCGAGUUCUCUACUAUAAUUUGCCUGUUUUCUACCGACGGGUAUGGUGUCUUUCGUAAUCUAAUUUUU5' ( -20.80[60.47%] )
>LC-m0094_3p	|ppa013844m|PACid:17652884	|location[62,82]
5'UAAGAGGACAAAAGAUGAGUG3'
|x|o|||||||||||x|||x|
3'CGUUGGCCUUUGGGUACUAGAAUAUAUAAGAGUUUCCUGUUUUCUUCUCUCCCUUAAGUUUCCUGAACCUAAACCUUUCGU5' ( -21.70[62.90%] )
>LC-m0094_3p	|ppa013846m|PACid:17644151	|location[62,82]
5'UAAGAGGACAAAAGAUGAGUG3'
|x|o|||||||||||x|||x|
3'CGUUGGCCUUUGGGUACUAGAAUAUAUAAGAGUUUCCUGUUUUCUUCUCUCCCUUAAGUUUCCUGAACCUAAACCUUUCGU5' ( -21.70[62.90%] )
>LC-m0094_3p	|ppa013847m|PACid:17655039	|location[62,82]
5'UAAGAGGACAAAAGAUGAGUG3'
|x|o|||||||||||x|||x|
3'CGUUGGCCUUUGGGUACUAGAAUAUAUAAGAGUUUCCUGUUUUCUUCUCUCCCUUAAGUUUCCUGAACCUAAACCUUUCGU5' ( -21.70[62.90%] )
>LC-m0096_3p	|ppa015762m|PACid:17660226	|location[569,590]
5'UUCCCAAGCCCGCCCAUUCCAA3'
|||||x|||||x|||||o||||
3'AGGAAUAUCUGAACGAACCGGUUCCACCAAAAGGGGUCGGGAGGGUAGGGUUGCUGGCGCUGACGGACCGCAGAUCGCAGCG5' ( -35.80[77.66%] )
>LC-m0096_3p	|ppa016482m|PACid:17643319	|location[569,590]
5'UUCCCAAGCCCGCCCAUUCCAA3'
|||||x|||||xx||||o||||
3'AGGAAUAUCUGAACGAACCGGUUCCACCAAAAGGGGUCGGGACGGUAGGGUUGCUGGCGCUGACGGACCGCAGGUUGCAGCG5' ( -31.30[67.90%] )
>LC-m0096_3p	|ppa020740m|PACid:17647985	|location[569,590]
5'UUCCCAAGCCCGCCCAUUCCAA3'
|||||x|||||x|||||o||||
3'AGGAAUAUCUGAACGAACCGGUUCCACCAAAAGGGGUCGGGAGGGUAGGGUUGCUGGCGCUGACGGACCGCAGGUCGUAGCG5' ( -35.80[77.66%] )
>LC-m0096_3p	|ppa017041m|PACid:17667310	|location[692,713]
5'UUCCCAAGCCCGCCCAUUCCAA3'
|||||||xx||||||||o||x|
3'AACAAUAUUUACCGAAACCGUUCGCAACAAAAGGGUUACGGCGGGUAGGGGUUUUAUGGUUAGUACGCUUGUUGUAGGAAUC5' ( -34.20[74.19%] )
>LC-m0096_3p	|ppa024045m|PACid:17656398	|location[656,677]
5'UUCCCAAGCCCGCCCAUUCCAA3'
||x||||x|||||||||x|||x
3'GACAACUUUUCUCGGAACCGUUCACAACAGAACGGUUGGGGCGGGUACGGUACUUAAGGGUCUUGAGCUUGAGGCGACCUAG5' ( -31.00[67.39%] )
>LC-m0096_3p	|ppa022876m|PACid:17647411	|location[599,620]
5'UUCCCAAGCCCGCCCAUUCCAA3'
||x||||x||||||||||||||
3'AGUAACAUUUCGUAAGCUCGUUCCCAACAGAACGGUUGGGGCGGGUAAGGUUGUUACCACUCCUUUCUGUGUAGUAGAAACG5' ( -35.40[76.79%] )
>LC-m0096_3p	|ppa001212m|PACid:17660869	|location[548,569]
5'UUCCCAAGCCCGCCCAUUCCAA3'
|||||x|x|||o|||||||||x
3'AACAAUACCUAGACCCAUUCCUCCCACCAGAAGGGGUGGGGUGGGUAAGGUAUAUUCGGUUAGUAAGGGUGAACAAGUAGAA5' ( -35.70[77.44%] )
>LC-m0096_3p	|ppa019630m|PACid:17663538	|location[1643,1664]
5'UUCCCAAGCCCGCCCAUUCCAA3'
|||||||o||||||x|o|||||
3'GGUGGUAGCAGCUAUAUCGGAAACAUGUGCAAGGGUUUGGGCGGUUGAGGUUACUACUUUGAUAGUAACUUCAAAACCCACC5' ( -37.00[80.61%] )
>LC-m0096_3p	|ppa000373m|PACid:17640939	|location[1200,1221]
5'UUCCCAAGCCCGCCCAUUCCAA3'
|||||x|o|||x||||||||x|
3'ACUACUAUAUAUCUAAAUCGGUUUCAACAAAAGGGGUUGGGAGGGUAAGGGUGUUACCCGUAGUGGCUCUCUAUCAAGAGAA5' ( -32.90[71.37%] )
>LC-m0096_3p	|ppa001409m|PACid:17643330	|location[1828,1849]
5'UUCCCAAGCCCGCCCAUUCCAA3'
|||||||ox||o||x|||||||
3'CAAGGUAGUAAAUUCUGAGGAAACAUAUGGAAGGGUUUUGGUGGUUAAGGUUAUUGGGUUGAGAGUAGUUUCAAUAAACAUC5' ( -28.50[61.69%] )
>LC-m0096_3p	|ppa001594m|PACid:17658510	|location[1496,1517]
5'UUCCCAAGCCCGCCCAUUCCAA3'
|||||||o|||o||x|||||||
3'CAAGGUAGUAAAUUCUGAGGGAACAUAUGGAAGGGUUUGGGUGGCUAAGGUUAUUGGGUUGAGAGUAGUUUCAAUAAACAUC5' ( -35.40[76.62%] )
>LC-m0096_3p	|ppa022498m|PACid:17650031	|location[650,671]
5'UUCCCAAGCCCGCCCAUUCCAA3'
||x||||x|||o|||||||||x
3'ACUAACCGGUUCCGAAAGUCGUGUCAUCAGAACGGUUAGGGUGGGUAAGGUAUUUACCGUUAAGAUGGUUAACACUGUGAUA5' ( -31.40[68.11%] )
>LC-m0096_3p	|ppa000335m|PACid:17645193	|location[690,711]
5'UUCCCAAGCCCGCCCAUUCCAA3'
||x||||x|||o||||||||||
3'AGUAACAUUUCGUAAGCUCGUUCCCAACAGAACGGUUGGGGUGGGUAAGGUUGUUACCACUCCUUUCUGUGUCCUAGGAACG5' ( -33.50[72.67%] )
>LC-m0096_3p	|ppa000343m|PACid:17655980	|location[596,617]
5'UUCCCAAGCCCGCCCAUUCCAA3'
||x||||x||||||||||||x|
3'AGUAAUAUUUCCUCGACUCGCUCCCAGCAGAACGGUUGGGGCGGGUAAGGGUGAUACCACUACUGUCUAUGUAGGAACAACG5' ( -34.40[74.62%] )
>LC-m0096_3p	|ppa000391m|PACid:17667187	|location[602,623]
5'UUCCCAAGCCCGCCCAUUCCAA3'
||x||||x||||||||||||x|
3'AGUAAUAUUUCCUCGACUCGCUCCCAACAGAACGGUUGGGGCGGGUAAGGGUGAUACCACUACUGCCUCUGUAGGAACAGCG5' ( -34.40[74.62%] )
>LC-m0096_3p	|ppa000407m|PACid:17665535	|location[605,626]
5'UUCCCAAGCCCGCCCAUUCCAA3'
||x||||x|||o||||||||||
3'AGUAACAUUUCGUAAGCUCGUUCCCAACAGAACGGUUGGGGUGGGUAAGGUUGUUACCCCUACUGUCUGUGUAAAAGGAGCG5' ( -33.50[72.67%] )
>LC-m0096_3p	|ppa014576m|PACid:17652031	|location[608,629]
5'UUCCCAAGCCCGCCCAUUCCAA3'
||x||||x|||o||||||||||
3'AGUAACAUUUCGUAAGCUCGUUCCCAACAGAACGGUUGGGGUGGGUAAGGUUGUUACCACUACUGUCUGUGUAGUAGGAACG5' ( -33.50[72.67%] )
>LC-m0096_3p	|ppa015274m|PACid:17652407	|location[605,626]
5'UUCCCAAGCCCGCCCAUUCCAA3'
||x||||x||||||||||||||
3'AGUAACAUUUCGUCAGCUCGUUCCCAACAGAACGGUUGGGGCGGGUAAGGUUGUUACCACUACUGUCUGUGUAGUAGGAACG5' ( -35.40[76.79%] )
>LC-m0096_3p	|ppa017078m|PACid:17669268	|location[599,620]
5'UUCCCAAGCCCGCCCAUUCCAA3'
||x||||x|||o||||||||||
3'AACAACAUUUCGUAAGCUCGUUCCCAACAGAACGGUUGGGGUGGGUAAGGUUGUUACCACUCCUGUCUGUGUAGUAGGAACG5' ( -33.50[72.67%] )
>LC-m0096_3p	|ppa017126m|PACid:17658905	|location[599,620]
5'UUCCCAAGCCCGCCCAUUCCAA3'
||x||||x|||o||||||||||
3'AACAACAUCUCGUAAGCUCGUUCCCAACAGAACGGUUGGGGUGGGUAAGGUUGUUACCACUCCUGUCUGUGUAGUAGGAACG5' ( -33.50[72.67%] )
>LC-m0096_3p	|ppa017399m|PACid:17650765	|location[479,500]
5'UUCCCAAGCCCGCCCAUUCCAA3'
||x||||x|||o||||||||||
3'AGUAACAUUUCGUAAGCUCGUUCCCAACAGAACGGUUGGGGUGGGUAAGGUUGUUACCCCUACUGUCUGUGUAAAAGGAGCG5' ( -33.50[72.67%] )
>LC-m0096_3p	|ppa019071m|PACid:17651510	|location[602,623]
5'UUCCCAAGCCCGCCCAUUCCAA3'
||x||||x||||||||||||x|
3'AGUAAUAUUUCCUCGACUCGCUCCCAACAGAACGGUUGGGGCGGGUAAGGGUGAUACCACUACUGCCUCUGUAGGAACAGCG5' ( -34.40[74.62%] )
>LC-m0096_3p	|ppa019097m|PACid:17656486	|location[605,626]
5'UUCCCAAGCCCGCCCAUUCCAA3'
||x||||x|||o||||||||||
3'AGUAACAUUUCGUAAGCUCGCUCCCAACAGAACGGUUGGGGUGGGUAAGGUUGUUACCAUUAGUGUCUGUGUAGUAGGAAUG5' ( -33.50[72.67%] )
>LC-m0096_3p	|ppa019824m|PACid:17667837	|location[608,629]
5'UUCCCAAGCCCGCCCAUUCCAA3'
||x||||x||||||||||||||
3'AGUAACAUUUCGUACGCCCGUUCCCAACAGAACGGUUGGGGCGGGUAAGGUUGUUACCACUACUUCCUGUGUAGGAGGAACG5' ( -35.40[76.79%] )
>LC-m0096_3p	|ppa020450m|PACid:17647153	|location[428,449]
5'UUCCCAAGCCCGCCCAUUCCAA3'
||x||||x||||||||||||||
3'AGUAACAUUUCGUUAGCCCGUUACCAACAGAACGGUUGGGGCGGGUAAGGUUGUUACCACUCCUGUCUGUGUAGUAGGAACG5' ( -35.40[76.79%] )
>LC-m0096_3p	|ppa020745m|PACid:17668467	|location[482,503]
5'UUCCCAAGCCCGCCCAUUCCAA3'
||x||||x||||||||||||||
3'AGUAACAUUUCGUUAGCCCGUUCCCAACAGAACGGUUGGGGCGGGUAAGGUUGUUACCACUCCUGUCUGUGUAGUAGGAACG5' ( -35.40[76.79%] )
>LC-m0096_3p	|ppa021541m|PACid:17662924	|location[575,596]
5'UUCCCAAGCCCGCCCAUUCCAA3'
||x||||x|||o||||||||||
3'AGUAAUAUUUCGUCAGCCCGUUCCCAACAGAACGGUUAGGGUGGGUAAGGUUGUUACCACUCCUGUCUGUGUAGUAGGAAUG5' ( -31.40[68.11%] )
>LC-m0096_3p	|ppa023090m|PACid:17652579	|location[575,596]
5'UUCCCAAGCCCGCCCAUUCCAA3'
||x||||x|||o||||||||||
3'AGUAACAUUUCGUAAGCUCGUUCCCAACAGAACGGUUGGGGUGGGUAAGGUUGUUACCAUUAGUGUCUGUGUAGUAGGAAUG5' ( -33.50[72.67%] )
>LC-m0096_3p	|ppa026310m|PACid:17662333	|location[587,608]
5'UUCCCAAGCCCGCCCAUUCCAA3'
||x||||x||||||||||||x|
3'AGUAAUAUUUCCUCGACUCGCUCCCAACAGAACGGUUGGGGCGGGUAAGGGUGAUACCACUACUGUCUAUGUAGGAACAACG5' ( -34.40[74.62%] )
>LC-m0097_3p	|ppa021452m|PACid:17656933	|location[103,123]
5'UGGCAAAUCAACUCAGCUUAG3'
x||||||||||xox|||||||
3'UUCCGCAACCUGUCCACGUUUAGACUCGGUCCCGUUUAGUUUGUUCGAAUCUCCUUCCCGGAAUCCGCCUCCACACCGACU5' ( -22.40[62.22%] )
>LC-m0097_3p	|ppa026232m|PACid:17657921	|location[1725,1745]
5'UGGCAAAUCAACUCAGCUUAG3'
|o||||||x||||||||xo||
3'ACUCCUACUCAUAUAAGGAGUUUGCCGUUCAUCGUUUAUUUGAGUCGUGUCACUGCUCCUUCCGCGAGAAACUUUUUCAGU5' ( -23.40[64.46%] )
>LC-m0101_3p	|ppa012437m|PACid:17648072	|location[161,180]
5'AAAGACUAAAAUACCCUUGA3'
|||||||||||xxx|||||x
3'ACGCCUCUAACUUCUCCUCCACCUCCACCUUUUCUGAUUUUCCAGGAACAAUGACGCCAACCCUCGUAGCAGAUCCUCGU5' ( -17.40[60.84%] )
>LC-m0101_3p	|ppa013211m|PACid:17655878	|location[447,466]
5'AAAGACUAAAAUACCCUUGA3'
|x|||||x|||||||||oo|
3'UGAAAUUUUUGAUCGGUUUUUGAGUCAAUUUAUCUGAGUUUAUGGGAGUUAUAAAUUUGAGUGUAUUUUGGAUUCUUCCU5' ( -21.30[74.48%] )
>LC-m0101_3p	|ppa017834m|PACid:17641445	|location[71,90]
5'AAAGACUAAAAUACCCUUGA3'
||||||||||||||||||o|
3'GAAGUGGUGGGAGUGUUUGGAUCUUUUAUCUUUCUGAUUUUAUGGGAAUUUUAUAUACCUUUUAACUUACCACAAUUUCA5' ( -26.30[92.28%] )
>LC-m0103_5p	|ppa008065m|PACid:17662475	|location[1058,1078]
5'UAGCCAAGGAUGACUUGCCUG3'
||||||||||||xx||||x||
3'AGUAGGAGAGGAACGCGAAGAGUUUCUUAGAUCGGUUCCUACGAAACGCACGAACUCCGUGACCAUGACGACCUUAGUCCA5' ( -27.30[66.42%] )
>LC-m0103_5p	|ppa011476m|PACid:17641245	|location[661,681]
5'UAGCCAAGGAUGACUUGCCUG3'
|||||||||||||xx||xx||
3'GAGUGAAUCAGUUGAGUCGACUCUCACACAAUCGGUUCCUACUAUACCAACUUCCUCUGUGGGGAGAUCAGGGUGGGUUUA5' ( -28.02[68.34%] )
>LC-m0103_5p	|ppa012173m|PACid:17666161	|location[698,718]
5'UAGCCAAGGAUGACUUGCCUG3'
x|||||||o||||x|||||||
3'GUGUUGUGGGUUAUUAAUGUUUUCAUUGGUUUCGGUUCUUACUAAACGGACUAUAUCUGUAACGUGUCGUCCCAAAGUGGG5' ( -30.30[74.26%] )
>LC-m0104_5p	|ppa008065m|PACid:17662475	|location[1058,1078]
5'UAGCCAAGGAUGACUUGCCUG3'
||||||||||||xx||||x||
3'AGUAGGAGAGGAACGCGAAGAGUUUCUUAGAUCGGUUCCUACGAAACGCACGAACUCCGUGACCAUGACGACCUUAGUCCA5' ( -27.30[66.42%] )
>LC-m0104_5p	|ppa011476m|PACid:17641245	|location[661,681]
5'UAGCCAAGGAUGACUUGCCUG3'
|||||||||||||xx||xx||
3'GAGUGAAUCAGUUGAGUCGACUCUCACACAAUCGGUUCCUACUAUACCAACUUCCUCUGUGGGGAGAUCAGGGUGGGUUUA5' ( -28.02[68.34%] )
>LC-m0104_5p	|ppa012173m|PACid:17666161	|location[698,718]
5'UAGCCAAGGAUGACUUGCCUG3'
x|||||||o||||x|||||||
3'GUGUUGUGGGUUAUUAAUGUUUUCAUUGGUUUCGGUUCUUACUAAACGGACUAUAUCUGUAACGUGUCGUCCCAAAGUGGG5' ( -30.30[74.26%] )
>LC-m0105_3p	|ppa009397m|PACid:17656533	|location[1000,1020]
5'UGCCAAAGAAGAGUUGCCCUA3'
ox|||||||||||||||xx||
3'UUUUAGAGGUAUUGUUCGUUCACGUAGGUAGAGGUUUCUUCUCAACGUAAUGGAGAGUCAUAAGAGACAAGUUUGUUCCUU5' ( -27.40[69.90%] )
>LC-m0105_3p	|ppa015730m|PACid:17660744	|location[338,358]
5'UGCCAAAGAAGAGUUGCCCUA3'
x||||||||||x||||x||||
3'UUAGCUUUCUGACUCUUCCUUUGAACAAUUCCGGUUUCUUCACAACCGGAUACUUCGGUAACCUCCCCCACGGUUUCCGGU5' ( -25.70[65.73%] )
>LC-m0105_3p	|ppa003154m|PACid:17650304	|location[866,886]
5'UGCCAAAGAAGAGUUGCCCUA3'
|x||||||||||||o|||||x
3'AUUCGUCGUCGACUAAACUCGUCGAAGUCGAAGGUUUCUUCUCAGCGGGAGCCAUAUUAUAGUCGGUUUCUGCUCUCCGUA5' ( -34.00[86.96%] )
>LC-m0105_3p	|ppa004613m|PACid:17651940	|location[338,358]
5'UGCCAAAGAAGAGUUGCCCUA3'
x||||||||||x||||x||||
3'UUAGCUUUCUGACUCUUCCUUUGAACAAUUCCGGUUUCUUCACAACCGGAUACUUCGGUAACCUCCCCCACGGUUUCCGGU5' ( -25.70[65.73%] )
>LC-m0105_3p	|ppa024435m|PACid:17650881	|location[248,268]
5'UGCCAAAGAAGAGUUGCCCUA3'
xo||||||||||x|||||||x
3'GAAAGAAAGAAGGGUUAAACAGUGGUUCGGUUGGUUUCUUCUGAACGGGACGGUUACACGGUGUUUCACGGUGUGGUAACU5' ( -31.30[79.85%] )
>LC-m0105_3p	|ppa025234m|PACid:17662545	|location[248,268]
5'UGCCAAAGAAGAGUUGCCCUA3'
x|||||||||||||||||||x
3'GAAAAAAGGAUGGUUCAAAUAGAGGUUCGGUCGGUUUCUUCUCAACGGGACGAUCCCAAGGUUUGUUUCGUUGGGGUCAAU5' ( -37.50[95.66%] )
>LC-m0106_3p	|ppa009397m|PACid:17656533	|location[1000,1020]
5'UGCCAAAGAAGAGUUGCCCUA3'
ox|||||||||||||||xx||
3'UUUUAGAGGUAUUGUUCGUUCACGUAGGUAGAGGUUUCUUCUCAACGUAAUGGAGAGUCAUAAGAGACAAGUUUGUUCCUU5' ( -27.40[69.90%] )
>LC-m0106_3p	|ppa015730m|PACid:17660744	|location[338,358]
5'UGCCAAAGAAGAGUUGCCCUA3'
x||||||||||x||||x||||
3'UUAGCUUUCUGACUCUUCCUUUGAACAAUUCCGGUUUCUUCACAACCGGAUACUUCGGUAACCUCCCCCACGGUUUCCGGU5' ( -25.70[65.73%] )
>LC-m0106_3p	|ppa003154m|PACid:17650304	|location[866,886]
5'UGCCAAAGAAGAGUUGCCCUA3'
|x||||||||||||o|||||x
3'AUUCGUCGUCGACUAAACUCGUCGAAGUCGAAGGUUUCUUCUCAGCGGGAGCCAUAUUAUAGUCGGUUUCUGCUCUCCGUA5' ( -34.00[86.96%] )
>LC-m0106_3p	|ppa004613m|PACid:17651940	|location[338,358]
5'UGCCAAAGAAGAGUUGCCCUA3'
x||||||||||x||||x||||
3'UUAGCUUUCUGACUCUUCCUUUGAACAAUUCCGGUUUCUUCACAACCGGAUACUUCGGUAACCUCCCCCACGGUUUCCGGU5' ( -25.70[65.73%] )
>LC-m0106_3p	|ppa024435m|PACid:17650881	|location[248,268]
5'UGCCAAAGAAGAGUUGCCCUA3'
xo||||||||||x|||||||x
3'GAAAGAAAGAAGGGUUAAACAGUGGUUCGGUUGGUUUCUUCUGAACGGGACGGUUACACGGUGUUUCACGGUGUGGUAACU5' ( -31.30[79.85%] )
>LC-m0106_3p	|ppa025234m|PACid:17662545	|location[248,268]
5'UGCCAAAGAAGAGUUGCCCUA3'
x|||||||||||||||||||x
3'GAAAAAAGGAUGGUUCAAAUAGAGGUUCGGUCGGUUUCUUCUCAACGGGACGAUCCCAAGGUUUGUUUCGUUGGGGUCAAU5' ( -37.50[95.66%] )
>LC-m0107_3p	|ppa009397m|PACid:17656533	|location[1000,1020]
5'UGCCAAAGAAGAGUUGCCCUA3'
ox|||||||||||||||xx||
3'UUUUAGAGGUAUUGUUCGUUCACGUAGGUAGAGGUUUCUUCUCAACGUAAUGGAGAGUCAUAAGAGACAAGUUUGUUCCUU5' ( -27.40[69.90%] )
>LC-m0107_3p	|ppa015730m|PACid:17660744	|location[338,358]
5'UGCCAAAGAAGAGUUGCCCUA3'
x||||||||||x||||x||||
3'UUAGCUUUCUGACUCUUCCUUUGAACAAUUCCGGUUUCUUCACAACCGGAUACUUCGGUAACCUCCCCCACGGUUUCCGGU5' ( -25.70[65.73%] )
>LC-m0107_3p	|ppa003154m|PACid:17650304	|location[866,886]
5'UGCCAAAGAAGAGUUGCCCUA3'
|x||||||||||||o|||||x
3'AUUCGUCGUCGACUAAACUCGUCGAAGUCGAAGGUUUCUUCUCAGCGGGAGCCAUAUUAUAGUCGGUUUCUGCUCUCCGUA5' ( -34.00[86.96%] )
>LC-m0107_3p	|ppa004613m|PACid:17651940	|location[338,358]
5'UGCCAAAGAAGAGUUGCCCUA3'
x||||||||||x||||x||||
3'UUAGCUUUCUGACUCUUCCUUUGAACAAUUCCGGUUUCUUCACAACCGGAUACUUCGGUAACCUCCCCCACGGUUUCCGGU5' ( -25.70[65.73%] )
>LC-m0107_3p	|ppa024435m|PACid:17650881	|location[248,268]
5'UGCCAAAGAAGAGUUGCCCUA3'
xo||||||||||x|||||||x
3'GAAAGAAAGAAGGGUUAAACAGUGGUUCGGUUGGUUUCUUCUGAACGGGACGGUUACACGGUGUUUCACGGUGUGGUAACU5' ( -31.30[79.85%] )
>LC-m0107_3p	|ppa025234m|PACid:17662545	|location[248,268]
5'UGCCAAAGAAGAGUUGCCCUA3'
x|||||||||||||||||||x
3'GAAAAAAGGAUGGUUCAAAUAGAGGUUCGGUCGGUUUCUUCUCAACGGGACGAUCCCAAGGUUUGUUUCGUUGGGGUCAAU5' ( -37.50[95.66%] )
>LC-m0108_3p	|ppa009397m|PACid:17656533	|location[1000,1020]
5'UGCCAAAGAAGAGUUGCCCUA3'
ox|||||||||||||||xx||
3'UUUUAGAGGUAUUGUUCGUUCACGUAGGUAGAGGUUUCUUCUCAACGUAAUGGAGAGUCAUAAGAGACAAGUUUGUUCCUU5' ( -27.40[69.90%] )
>LC-m0108_3p	|ppa015730m|PACid:17660744	|location[338,358]
5'UGCCAAAGAAGAGUUGCCCUA3'
x||||||||||x||||x||||
3'UUAGCUUUCUGACUCUUCCUUUGAACAAUUCCGGUUUCUUCACAACCGGAUACUUCGGUAACCUCCCCCACGGUUUCCGGU5' ( -25.70[65.73%] )
>LC-m0108_3p	|ppa003154m|PACid:17650304	|location[866,886]
5'UGCCAAAGAAGAGUUGCCCUA3'
|x||||||||||||o|||||x
3'AUUCGUCGUCGACUAAACUCGUCGAAGUCGAAGGUUUCUUCUCAGCGGGAGCCAUAUUAUAGUCGGUUUCUGCUCUCCGUA5' ( -34.00[86.96%] )
>LC-m0108_3p	|ppa004613m|PACid:17651940	|location[338,358]
5'UGCCAAAGAAGAGUUGCCCUA3'
x||||||||||x||||x||||
3'UUAGCUUUCUGACUCUUCCUUUGAACAAUUCCGGUUUCUUCACAACCGGAUACUUCGGUAACCUCCCCCACGGUUUCCGGU5' ( -25.70[65.73%] )
>LC-m0108_3p	|ppa024435m|PACid:17650881	|location[248,268]
5'UGCCAAAGAAGAGUUGCCCUA3'
xo||||||||||x|||||||x
3'GAAAGAAAGAAGGGUUAAACAGUGGUUCGGUUGGUUUCUUCUGAACGGGACGGUUACACGGUGUUUCACGGUGUGGUAACU5' ( -31.30[79.85%] )
>LC-m0108_3p	|ppa025234m|PACid:17662545	|location[248,268]
5'UGCCAAAGAAGAGUUGCCCUA3'
x|||||||||||||||||||x
3'GAAAAAAGGAUGGUUCAAAUAGAGGUUCGGUCGGUUUCUUCUCAACGGGACGAUCCCAAGGUUUGUUUCGUUGGGGUCAAU5' ( -37.50[95.66%] )
>LC-m0109_5p	|ppa000737m|PACid:17643055	|location[62,81]
5'AUGGCAGAUGAGGUGGACAG3'
|||||x|||||||x|||xx|
3'AAGAACCAGAACGUUACUGACUCUCAACCGUACCGACUACUCCUCCUCCCCCUCCUUCUCUUCCUUCGUCUCUACCCACA5' ( -24.40[60.55%] )
>LC-m0109_5p	|ppa019571m|PACid:17641801	|location[62,81]
5'AUGGCAGAUGAGGUGGACAG3'
|||||x|||||||x|||xx|
3'AAGAACCAGAACGUUACUGACUCUCAACCGUACCGACUACUCCUCCUCCCCCUCCUUCUCGUCCUGCGUCUCUACCCACA5' ( -24.40[60.55%] )
>LC-m0109_5p	|ppa022950m|PACid:17643627	|location[62,81]
5'AUGGCAGAUGAGGUGGACAG3'
|||||x|||||||x|||xx|
3'AAGAACCAGAACGUUACUGACUCUCAACCGUACCGACUACUCCUCCUCCCCCUCCUUCUCUUCCUUCGUCUCUACCUACA5' ( -24.40[60.55%] )
>LC-m0109_5p	|ppa022635m|PACid:17649018	|location[224,243]
5'AUGGCAGAUGAGGUGGACAG3'
|||||||||||o||||x|xx
3'CGGCAGGCGGUGAGGCUACCAGACCCGCAGUACCGUCUACUUCACCCGCAGAAGCGGGUCCCCAAAAAGGAACAAGAGAA5' ( -30.10[74.88%] )
>LC-m0109_5p	|ppa013442m|PACid:17662880	|location[92,111]
5'AUGGCAGAUGAGGUGGACAG3'
||o|x||||||||x|o||||
3'GAGACUGACUCAACCUUAUCGAUUCUGGAGUAUCCUCUACUCCUCUUGUCGUUUCUGUUCUGGUUCUUCUUCUUUUCGGA5' ( -24.40[60.70%] )
>LC-m0109_5p	|ppa001875m|PACid:17643801	|location[636,655]
5'AUGGCAGAUGAGGUGGACAG3'
|x||||x||||||||||xx|
3'UUGACGGUUGGGGCUCUAGUUCCCUCGCCCUUCCGUGUACUCCACCUUACACUCUUCUUUUACUCGAACGGUUUCCGAAC5' ( -27.50[68.92%] )
>LC-m0109_5p	|ppa005803m|PACid:17655267	|location[1054,1073]
5'AUGGCAGAUGAGGUGGACAG3'
|||||||xx||||||||x|x
3'AACAGAGGACACGUUAGAACCCUUACAGACUACCGUCCCCUCCACCUUUGGCGAGUGUUCGGGGUACACAUAGCUCUAGU5' ( -26.50[66.92%] )
>LC-m0109_5p	|ppa010858m|PACid:17663734	|location[275,294]
5'AUGGCAGAUGAGGUGGACAG3'
|x||x||||||||xo|||||
3'CUUUGCCCCAGCAUAUUCCUAUCUCUACUCUUCCCUCUACUCCCUCUGUCAAAUUAACAAAUUUUUAACUACUUACUUUU5' ( -25.70[64.41%] )
>LC-m0109_5p	|ppa017079m|PACid:17664635	|location[44,63]
5'AUGGCAGAUGAGGUGGACAG3'
||o|x||||||||x|o||||
3'GAGACUGACUCAACCUUAUCGAUUCUGGAGUAUCCUCUACUCCUCUUGUCGUUUCUGUUCUGGUUCUUCUUCUUUUCGGA5' ( -24.40[60.70%] )
>LC-m0109_5p	|ppa002291m|PACid:17659234	|location[442,461]
5'AUGGCAGAUGAGGUGGACAG3'
|||||x|||||||o|||x|o
3'ACCCCACCUAGUACUAGUAGUCCCUAAACCUACCGACUACUCCGCCUCUUGAACCGUGACGGUUCUUCGAAAUGUAGUAG5' ( -27.40[69.19%] )
>LC-m0109_5p	|ppa016927m|PACid:17662967	|location[284,303]
5'AUGGCAGAUGAGGUGGACAG3'
|x|||||||||o||o|||x|
3'GAAGUACGGUGACCGUGUCACUGGACCUCAUCCCGUCUACUUCAUCUGACCUGGUCGAACACUCUCCCCCUAACUACACA5' ( -30.10[74.69%] )
>LC-m0109_5p	|ppa021476m|PACid:17640334	|location[106,125]
5'AUGGCAGAUGAGGUGGACAG3'
|||||||x||||||||xx|x
3'GACUUAUACGAGGGCUACCUCUCCAGAAAUUACCGUCGACUCCACCGCUGGACCGCGAGCUAAACCCAGUAGACCGGCUG5' ( -27.60[69.70%] )
>LC-m0109_5p	|ppa026252m|PACid:17641872	|location[106,125]
5'AUGGCAGAUGAGGUGGACAG3'
|||||||x||||||||xx|x
3'GACUUAUACGAGGGCUACCUCUCCAGAAAUUACCGUCGACUCCACCGCUGGACCGCGAGCUAAACCCAGUAGACCGGCUG5' ( -27.60[69.70%] )
>LC-m0110_3p	|ppa009397m|PACid:17656533	|location[1000,1020]
5'UGCCAAAGAAGAGUUGCCCUA3'
ox|||||||||||||||xx||
3'UUUUAGAGGUAUUGUUCGUUCACGUAGGUAGAGGUUUCUUCUCAACGUAAUGGAGAGUCAUAAGAGACAAGUUUGUUCCUU5' ( -27.40[69.90%] )
>LC-m0110_3p	|ppa015730m|PACid:17660744	|location[338,358]
5'UGCCAAAGAAGAGUUGCCCUA3'
x||||||||||x||||x||||
3'UUAGCUUUCUGACUCUUCCUUUGAACAAUUCCGGUUUCUUCACAACCGGAUACUUCGGUAACCUCCCCCACGGUUUCCGGU5' ( -25.70[65.73%] )
>LC-m0110_3p	|ppa003154m|PACid:17650304	|location[866,886]
5'UGCCAAAGAAGAGUUGCCCUA3'
|x||||||||||||o|||||x
3'AUUCGUCGUCGACUAAACUCGUCGAAGUCGAAGGUUUCUUCUCAGCGGGAGCCAUAUUAUAGUCGGUUUCUGCUCUCCGUA5' ( -34.00[86.96%] )
>LC-m0110_3p	|ppa004613m|PACid:17651940	|location[338,358]
5'UGCCAAAGAAGAGUUGCCCUA3'
x||||||||||x||||x||||
3'UUAGCUUUCUGACUCUUCCUUUGAACAAUUCCGGUUUCUUCACAACCGGAUACUUCGGUAACCUCCCCCACGGUUUCCGGU5' ( -25.70[65.73%] )
>LC-m0110_3p	|ppa024435m|PACid:17650881	|location[248,268]
5'UGCCAAAGAAGAGUUGCCCUA3'
xo||||||||||x|||||||x
3'GAAAGAAAGAAGGGUUAAACAGUGGUUCGGUUGGUUUCUUCUGAACGGGACGGUUACACGGUGUUUCACGGUGUGGUAACU5' ( -31.30[79.85%] )
>LC-m0110_3p	|ppa025234m|PACid:17662545	|location[248,268]
5'UGCCAAAGAAGAGUUGCCCUA3'
x|||||||||||||||||||x
3'GAAAAAAGGAUGGUUCAAAUAGAGGUUCGGUCGGUUUCUUCUCAACGGGACGAUCCCAAGGUUUGUUUCGUUGGGGUCAAU5' ( -37.50[95.66%] )
>LC-m0111_3p	|ppa001212m|PACid:17660869	|location[2234,2254]
5'CUACGAACUGAAGACCAAGGA3'
|||||||||||||||||||||
3'CCAAGAACUCUAAACACGUUAGAUGAUGAAGAUGCUUGACUUCUGGUUCCUUCGCUAAGCCUAAAAGGUCUGCACAAUAGG5' ( -38.50[100.00%] )
>LC-m0111_3p	|ppa016635m|PACid:17652588	|location[2237,2257]
5'CUACGAACUGAAGACCAAGGA3'
|||||||||||||||||||||
3'CCAAGAACUCUAAGCACGUUAGAUGAUGAAGAUGCUUGACUUCUGGUUCCUUCGUUCAGCCUAAAAGGUCUGCACAAUAGG5' ( -38.50[100.00%] )
>LC-m0111_3p	|ppa021194m|PACid:17667322	|location[2228,2248]
5'CUACGAACUGAAGACCAAGGA3'
|||||||||||||||||||||
3'CCAAGAACUCUAAGCACGUUACAUGAUGAAGAUGCUUGACUUCUGGUUCCUUCGUUAAGCCUAAAAGGUCUGCACAAUAGG5' ( -38.50[100.00%] )
>LC-m0111_3p	|ppa023373m|PACid:17660545	|location[2210,2230]
5'CUACGAACUGAAGACCAAGGA3'
|||||||||||||||||||||
3'CCAAGAACUCUAAGCACGUUAAAUGAUGAAGAUGCUUGACUUCUGGUUCCUUCGUUGAGCCUAAAAGGUUUCCAUAAAAGG5' ( -38.50[100.00%] )
>LC-m0111_3p	|ppa026312m|PACid:17665093	|location[488,508]
5'CUACGAACUGAAGACCAAGGA3'
|||||||||||||||||||||
3'CCAAGAACUCUAAGCACGUUAGAUGAUGAAGAUGCUUGACUUCUGGUUCCUUCGUUCAGCCUAAAAGGUCUGCACAAUAGG5' ( -38.50[100.00%] )
>LC-m0112_3p	|ppa001212m|PACid:17660869	|location[2234,2254]
5'CUACGAACUGAAGACCAAGGA3'
|||||||||||||||||||||
3'CCAAGAACUCUAAACACGUUAGAUGAUGAAGAUGCUUGACUUCUGGUUCCUUCGCUAAGCCUAAAAGGUCUGCACAAUAGG5' ( -38.50[100.00%] )
>LC-m0112_3p	|ppa016635m|PACid:17652588	|location[2237,2257]
5'CUACGAACUGAAGACCAAGGA3'
|||||||||||||||||||||
3'CCAAGAACUCUAAGCACGUUAGAUGAUGAAGAUGCUUGACUUCUGGUUCCUUCGUUCAGCCUAAAAGGUCUGCACAAUAGG5' ( -38.50[100.00%] )
>LC-m0112_3p	|ppa021194m|PACid:17667322	|location[2228,2248]
5'CUACGAACUGAAGACCAAGGA3'
|||||||||||||||||||||
3'CCAAGAACUCUAAGCACGUUACAUGAUGAAGAUGCUUGACUUCUGGUUCCUUCGUUAAGCCUAAAAGGUCUGCACAAUAGG5' ( -38.50[100.00%] )
>LC-m0112_3p	|ppa023373m|PACid:17660545	|location[2210,2230]
5'CUACGAACUGAAGACCAAGGA3'
|||||||||||||||||||||
3'CCAAGAACUCUAAGCACGUUAAAUGAUGAAGAUGCUUGACUUCUGGUUCCUUCGUUGAGCCUAAAAGGUUUCCAUAAAAGG5' ( -38.50[100.00%] )
>LC-m0112_3p	|ppa026312m|PACid:17665093	|location[488,508]
5'CUACGAACUGAAGACCAAGGA3'
|||||||||||||||||||||
3'CCAAGAACUCUAAGCACGUUAGAUGAUGAAGAUGCUUGACUUCUGGUUCCUUCGUUCAGCCUAAAAGGUCUGCACAAUAGG5' ( -38.50[100.00%] )
>LC-m0113_3p	|ppa001212m|PACid:17660869	|location[2234,2254]
5'CUACGAACUGAAGACCAAGGA3'
|||||||||||||||||||||
3'CCAAGAACUCUAAACACGUUAGAUGAUGAAGAUGCUUGACUUCUGGUUCCUUCGCUAAGCCUAAAAGGUCUGCACAAUAGG5' ( -38.50[100.00%] )
>LC-m0113_3p	|ppa016635m|PACid:17652588	|location[2237,2257]
5'CUACGAACUGAAGACCAAGGA3'
|||||||||||||||||||||
3'CCAAGAACUCUAAGCACGUUAGAUGAUGAAGAUGCUUGACUUCUGGUUCCUUCGUUCAGCCUAAAAGGUCUGCACAAUAGG5' ( -38.50[100.00%] )
>LC-m0113_3p	|ppa021194m|PACid:17667322	|location[2228,2248]
5'CUACGAACUGAAGACCAAGGA3'
|||||||||||||||||||||
3'CCAAGAACUCUAAGCACGUUACAUGAUGAAGAUGCUUGACUUCUGGUUCCUUCGUUAAGCCUAAAAGGUCUGCACAAUAGG5' ( -38.50[100.00%] )
>LC-m0113_3p	|ppa023373m|PACid:17660545	|location[2210,2230]
5'CUACGAACUGAAGACCAAGGA3'
|||||||||||||||||||||
3'CCAAGAACUCUAAGCACGUUAAAUGAUGAAGAUGCUUGACUUCUGGUUCCUUCGUUGAGCCUAAAAGGUUUCCAUAAAAGG5' ( -38.50[100.00%] )
>LC-m0113_3p	|ppa026312m|PACid:17665093	|location[488,508]
5'CUACGAACUGAAGACCAAGGA3'
|||||||||||||||||||||
3'CCAAGAACUCUAAGCACGUUAGAUGAUGAAGAUGCUUGACUUCUGGUUCCUUCGUUCAGCCUAAAAGGUCUGCACAAUAGG5' ( -38.50[100.00%] )
>LC-m0116_3p	|ppa014500m|PACid:17642168	|location[42,62]
5'UCUUAGUUGGCAUCAGGGGAG3'
||||||o|o||x|||o|||||
3'CUGUGUAUAUCGGGAUCCCAAAGUGAUACGAGAAUCGAUCGGAGUUCCCUCAUUCUUAGAAGUUAUAAAUUUAGACUUUGC5' ( -32.30[77.64%] )
>LC-m0117_5p	|ppa008953m|PACid:17642768	|location[644,665]
5'UGAUAUUGGCACGGCUCAAUCA3'
|||o|||o||||x|||||||x|
3'GUCUUAGUCGUGAAGAGAACCAGGGUCGACACUGUAAUCGUGACGAGUUACUUCUUCUUCUACUCCUGCUGCUUCUUCGACU5' ( -27.10[68.09%] )
>LC-m0117_5p	|ppa008961m|PACid:17642769	|location[644,665]
5'UGAUAUUGGCACGGCUCAAUCA3'
|||o|||o||||x|||||||x|
3'GUCUUAGUCGUGAAGAGAACCAGGGUCGACACUGUAAUCGUGACGAGUUACUUCUUCUUCUACUCCUGCUGCUUCUUCGACU5' ( -27.10[68.09%] )
>LC-m0118_3p	|ppa012437m|PACid:17648072	|location[161,180]
5'AAAGACUAAAAUACCCUUGA3'
|||||||||||xxx|||||x
3'ACGCCUCUAACUUCUCCUCCACCUCCACCUUUUCUGAUUUUCCAGGAACAAUGACGCCAACCCUCGUAGCAGAUCCUCGU5' ( -17.40[60.84%] )
>LC-m0118_3p	|ppa013211m|PACid:17655878	|location[447,466]
5'AAAGACUAAAAUACCCUUGA3'
|x|||||x|||||||||oo|
3'UGAAAUUUUUGAUCGGUUUUUGAGUCAAUUUAUCUGAGUUUAUGGGAGUUAUAAAUUUGAGUGUAUUUUGGAUUCUUCCU5' ( -21.30[74.48%] )
>LC-m0118_3p	|ppa017834m|PACid:17641445	|location[71,90]
5'AAAGACUAAAAUACCCUUGA3'
||||||||||||||||||o|
3'GAAGUGGUGGGAGUGUUUGGAUCUUUUAUCUUUCUGAUUUUAUGGGAAUUUUAUAUACCUUUUAACUUACCACAAUUUCA5' ( -26.30[92.28%] )
>LC-m0119_3p	|ppa012437m|PACid:17648072	|location[161,180]
5'AAAGACUAAAAUACCCUUGA3'
|||||||||||xxx|||||x
3'ACGCCUCUAACUUCUCCUCCACCUCCACCUUUUCUGAUUUUCCAGGAACAAUGACGCCAACCCUCGUAGCAGAUCCUCGU5' ( -17.40[60.84%] )
>LC-m0119_3p	|ppa013211m|PACid:17655878	|location[447,466]
5'AAAGACUAAAAUACCCUUGA3'
|x|||||x|||||||||oo|
3'UGAAAUUUUUGAUCGGUUUUUGAGUCAAUUUAUCUGAGUUUAUGGGAGUUAUAAAUUUGAGUGUAUUUUGGAUUCUUCCU5' ( -21.30[74.48%] )
>LC-m0119_3p	|ppa017834m|PACid:17641445	|location[71,90]
5'AAAGACUAAAAUACCCUUGA3'
||||||||||||||||||o|
3'GAAGUGGUGGGAGUGUUUGGAUCUUUUAUCUUUCUGAUUUUAUGGGAAUUUUAUAUACCUUUUAACUUACCACAAUUUCA5' ( -26.30[92.28%] )
>LC-m0120_5p	|ppa006634m|PACid:17655522	|location[1241,1261]
5'CAGCCAAGGAUGACUUGCCGG3'
x|||||||o||||x||||||x
3'GGUAAGUAGAUACGGUGUUCGUGUUCUUGUUUCGGUUCUUACUUAACGGCGGACCGUUUGUGUAACGGUUUCUAUAUUGGU5' ( -30.00[68.65%] )
>LC-m0120_5p	|ppa012173m|PACid:17666161	|location[698,718]
5'CAGCCAAGGAUGACUUGCCGG3'
x|||||||o||||x|||||x|
3'GUGUUGUGGGUUAUUAAUGUUUUCAUUGGUUUCGGUUCUUACUAAACGGACUAUAUCUGUAACGUGUCGUCCCAAAGUGGG5' ( -28.00[64.22%] )
>LC-m0124_3p	|ppa000741m|PACid:17655652	|location[3156,3178]
5'AAUGGUUAUCAAACGGGCCCUUA3'
|||||||||||||xx||||||x|
3'CUUUUUAUUUUUGACUUUUGACUUUUGACUUUACCAAUAGUUUAACCGGGAUUUACUUCAUUCUCCAUCAACUUCAAAAACCA5' ( -29.10[72.93%] )
>LC-m0125_5p	|ppa024028m|PACid:17654040	|location[670,690]
5'AGCUAGGUGCAACAAGUUCAA3'
||||||||x||xx||o|||||
3'CCGUGGUCAAAAACGUCGUGCAAGACUUGGUCGAUCCAGGUGAUUUAAGUUUUGACUUUGUGCCUGGCGUAGUGUUCUUGA5' ( -23.10[63.11%] )
>LC-m0125_5p	|ppa002274m|PACid:17657034	|location[1862,1882]
5'AGCUAGGUGCAACAAGUUCAA3'
|o|||||xo||||||x|||||
3'GUAGAAGAGGUAAAUAAUGUCCUUGUUCCCUUGAUCCCUGUUGUUGAAGUUGUCACCACAACCAAUAAUAUCGACCGACCG5' ( -23.90[66.39%] )
>LC-m0125_5p	|ppa014536m|PACid:17653015	|location[386,406]
5'AGCUAGGUGCAACAAGUUCAA3'
|||o|oo||||x|||||||||
3'GUUGAAAACAAAGUAAAAACUUCUAACAGAUCGGUUUACGUGGUUCAAGUUUUGGUUACUUAUCUUCAUAAAGAAGAGUAC5' ( -27.00[73.77%] )
>LC-m0126_3p	|ppa007128m|PACid:17666929	|location[569,589]
5'UAGAGAGAUGGUCAGCAAUGU3'
x|o||||||||||||x||||x
3'GAAAAAGAGCUCGUACAGAGUAUUCUACUUCUUUCUCUACCAGUCUUUACUUCGCUCUGCGCAGUCCAGGUGGUACGGGUA5' ( -25.60[68.09%] )
>LC-m0126_3p	|ppa008085m|PACid:17652272	|location[74,94]
5'UAGAGAGAUGGUCAGCAAUGU3'
x|||||o|||||||x||||||
3'GGACCUAGUUUCCGAGUCUUCCCAUUCUACCUCUCUUUACCAGUAGUUACAACUACAACAAUCCUCACAUCCCGUUCUUUU5' ( -26.90[71.54%] )
>LC-m0126_3p	|ppa004550m|PACid:17669027	|location[1189,1209]
5'UAGAGAGAUGGUCAGCAAUGU3'
x|x||||||||o||||||||x
3'ACUCUCAUAUCCAACUUACGGUAAGUUCUUUUGUCUCUACCGGUCGUUACCCCAAUUUAGUCUAUGACGGCGCUAUUGCUG5' ( -30.70[81.43%] )
>LC-m0126_3p	|ppa004566m|PACid:17653878	|location[1189,1209]
5'UAGAGAGAUGGUCAGCAAUGU3'
x|x||||||||o||||||||x
3'ACUCUCAUAUCCAACUUACGGUAAGUUCUUUUGUCUCUACCGGUCGUUACCCCAAUUUAGUCUAUGACGACGCUAUUGAUG5' ( -30.70[81.43%] )
>LC-m0126_3p	|ppa006338m|PACid:17664200	|location[1004,1024]
5'UAGAGAGAUGGUCAGCAAUGU3'
||o||||x||||||||||x||
3'GUAAGGUUUGUAGUGUUUACAUCGAGAGUAAUUUCUCGACCAGUCGUUUCAUACCGGUCGUGUCCUUUCCUUGGGGUGACG5' ( -26.30[69.58%] )
>LC-m0126_3p	|ppa000722m|PACid:17667848	|location[392,412]
5'UAGAGAGAUGGUCAGCAAUGU3'
o||x|||||||o|||||||||
3'CUCGUCGUAGUCAGUUCUCGGGGUAAAGCUGUCCCUCUACCGGUCGUUACAGCCGUACCAAGUCCAGGUUUGGCCGGUGUU5' ( -32.10[84.92%] )
>LC-m0126_3p	|ppa003400m|PACid:17663891	|location[605,625]
5'UAGAGAGAUGGUCAGCAAUGU3'
ox|||||||||||x|||||x|
3'GAACUCGUACUGGUCCCGUAACGAGUGCACGACUCUCUACCAGACGUUAGACGAAACUUAAAGUACGGAGUGUUAAGGUCA5' ( -27.30[72.61%] )
>LC-m0127_5p	|ppa024629m|PACid:17668642	|location[211,231]
5'GCAAGCUGUCCUUGGUUCACG3'
o|||||||o|||||||||x|o
3'AAAUGUCGCUGCGGUACGACAAACGUUUUGUGUUCGACGGGAACCAAGGGUAACGUCGUUUGGUUUCGACAAUGACCGCCU5' ( -34.20[80.09%] )
>LC-m0127_5p	|ppa005654m|PACid:17666699	|location[1178,1198]
5'GCAAGCUGUCCUUGGUUCACG3'
|||||||||||||x|x|x||x
3'GAAAUAGGUAGUGUGAAAAUUAUCGAAACGCGUUCGACAGGAAACUAUUGGUGGGUAAAAGAAGAGAGAGAUGGAGGUGUC5' ( -29.50[69.74%] )
>LC-m0128_3p	|ppa014587m|PACid:17641540	|location[248,270]
5'CAAGGAAGUGAGAAGGCUAGUUA3'
|||||||||||||||||||xox|
3'UCUUCGUGAUUCACAGGAUAGUCCGAACUAGUUCCUUCACUCUUCCGAUGGUUAGGAGGAUCGUAUCCCGUGGUAUAGAACUU5' ( -35.60[85.99%] )
>LC-m0128_3p	|ppa020623m|PACid:17651934	|location[206,228]
5'CAAGGAAGUGAGAAGGCUAGUUA3'
||||||||||||||||||||||x
3'UCUUCGUGAUUCACAGGAUAGUCCGAACUAGUUCCUUCACUCUUCCGAUCAACUGUUCGAAGAAGAACACCUGUAUAUAAACU5' ( -40.80[98.79%] )
>LC-m0128_3p	|ppa022771m|PACid:17650003	|location[200,222]
5'CAAGGAAGUGAGAAGGCUAGUUA3'
||||||||||||||||||||||x
3'UCUUCGUGAUUCACAGGAUAGUCCGAACUAGUUCCUUCACUCUUCCGAUCAACUGUUCAAAGAAGAACACCUGUAUAUAAACU5' ( -40.80[98.79%] )
>LC-m0128_3p	|ppa026507m|PACid:17653364	|location[65,87]
5'CAAGGAAGUGAGAAGGCUAGUUA3'
||||||||||||||||||||||x
3'UCUUCGUGAUUCACAGGAUAGUCCGAACUAGUUCCUUCACUCUUCCGAUCAACUGUUCGAAGAAGAACACCUGUAUAUAAACU5' ( -40.80[98.79%] )
>LC-m0128_3p	|ppb014210m|PACid:17664401	|location[230,252]
5'CAAGGAAGUGAGAAGGCUAGUUA3'
||||||||||||||||||||||x
3'UCUUCGUGAUUCACAGGAUAGUCCGAACUAGUUCCUUCACUCUUCCGAUCAACUGUUCGAAGAAGAACACCUGUAUAUAAACU5' ( -40.80[98.79%] )
>LC-m0128_3p	|ppb017176m|PACid:17651467	|location[212,234]
5'CAAGGAAGUGAGAAGGCUAGUUA3'
||||||||||||||||||||||x
3'UCUUCGUGAUUCACAGGAUAGUCCGAACUAGUUCCUUCACUCUUCCGAUCAACUGUUCGAAGAAGAACACCUGUAUAUAAACU5' ( -40.80[98.79%] )
>LC-m0128_3p	|ppb019068m|PACid:17648759	|location[185,207]
5'CAAGGAAGUGAGAAGGCUAGUUA3'
||||||||||||||||||||||x
3'UUUUCGUGAUUCACAGGAUAGUCCGAACUAGUUCCUUCACUCUUCCGAUCAACUGUUCGAAGAAGAACACCUGUAUCUAAACU5' ( -40.80[98.79%] )
>LC-m0128_3p	|ppa023855m|PACid:17650025	|location[23,45]
5'CAAGGAAGUGAGAAGGCUAGUUA3'
||||||||||||||||||||||x
3'UCUUCGUGAUUCACAGGAUAGUCCGAACUAGUUCCUUCACUCUUCCGAUCAACUGUUCGAAGAAGAACACCUGUA5' ( -40.80[98.79%] )
>LC-m0128_3p	|ppb018548m|PACid:17662293	|location[316,338]
5'CAAGGAAGUGAGAAGGCUAGUUA3'
||||||||||||||||||||||x
3'AGUUCCUUCACUCUUCCGAUCAACUGUUCGAAGAAGAACACCUGUAUAUAAACU5' ( -40.80[98.79%] )
>LC-m0128_3p	|ppa015947m|PACid:17653208	|location[23,45]
5'CAAGGAAGUGAGAAGGCUAGUUA3'
||||||||||||||||||||||x
3'UCUUCGUGAUUCACAGGAUAGUCCGAACUAGUUCCUUCACUCUUCCGAUCAACUGUUCGAAGAAGAACACCUGUA5' ( -40.80[98.79%] )
>LC-m0128_3p	|ppa021487m|PACid:17643942	|location[23,45]
5'CAAGGAAGUGAGAAGGCUAGUUA3'
||||||||||||||||||||||x
3'UCUUCGUGAUUCACAGGAUAGUCCGAACUAGUUCCUUCACUCUUCCGAUCAACUGUUCGAAGAAGAACACCUGUA5' ( -40.80[98.79%] )
>LC-m0128_3p	|ppa026093m|PACid:17646107	|location[23,45]
5'CAAGGAAGUGAGAAGGCUAGUUA3'
||||||||||||||||||||||x
3'UCUUCGUGAUUCACAGGAUAGUCCGAACUAGUUCCUUCACUCUUCCGAUCAACUGUUCGAAGAAGAACACCUGUA5' ( -40.80[98.79%] )
>LC-m0128_3p	|ppb014096m|PACid:17643665	|location[164,186]
5'CAAGGAAGUGAGAAGGCUAGUUA3'
||||||||||||||||||||||x
3'UCUUCGUGAUUCACAGGAUAGUCCGAACUAGUUCCUUCACUCUUCCGAUCAACUGUUCGAAGAAGAACACCUGUAUAUAAACU5' ( -40.80[98.79%] )
>LC-m0128_3p	|ppa013254m|PACid:17657148	|location[23,45]
5'CAAGGAAGUGAGAAGGCUAGUUA3'
||||||||||||||||||||||x
3'UCUUCGUGAUUCACAGGAUAGUCCGAACUAGUUCCUUCACUCUUCCGAUCAACUGUUCGAAGAAGAACACCUGUA5' ( -40.80[98.79%] )
>LC-m0128_3p	|ppa013914m|PACid:17667182	|location[180,202]
5'CAAGGAAGUGAGAAGGCUAGUUA3'
||||||||||||||||||||||x
3'UCUUCGUGAUUCACAGGAUAGUCCGAACUAGUUCCUUCACUCUUCCGAUCAACUGUUCGAAGAAGAACACCUGUAUAUAAACU5' ( -40.80[98.79%] )
>LC-m0128_3p	|ppa014597m|PACid:17663302	|location[83,105]
5'CAAGGAAGUGAGAAGGCUAGUUA3'
||||||||||||||||||||||x
3'UCUUCGUGAUUCACAGGAUAGUCCGAACUAGUUCCUUCACUCUUCCGAUCAACUGUUCGAAGAAGAACACCUGUUCGAAGAAG5' ( -40.80[98.79%] )
>LC-m0128_3p	|ppa016017m|PACid:17646272	|location[65,87]
5'CAAGGAAGUGAGAAGGCUAGUUA3'
||||||||||||||||||||||x
3'UCUUCGUGAUUCACAGGAUAGUCCGAACUAGUUCCUUCACUCUUCCGAUCAACUGUUCGAAGAAGAACACCUGUAUAUAAACU5' ( -40.80[98.79%] )
>LC-m0128_3p	|ppa016905m|PACid:17662879	|location[65,87]
5'CAAGGAAGUGAGAAGGCUAGUUA3'
||||||||||||||||||||||x
3'UCUUCGUGAUUCACAGGAUAGUCCGAACUAGUUCCUUCACUCUUCCGAUCAACUGUUCGAAGAAGAACACCUGUAUAUAAACU5' ( -40.80[98.79%] )
>LC-m0128_3p	|ppa017264m|PACid:17649439	|location[23,45]
5'CAAGGAAGUGAGAAGGCUAGUUA3'
||||||||||||||||||||||x
3'UCUUCGUGAUUCACAGGAUAGUCCGAACUAGUUCCUUCACUCUUCCGAUCAACUGUUCGAAGAAGAACACCUGUA5' ( -40.80[98.79%] )
>LC-m0128_3p	|ppa019003m|PACid:17655969	|location[65,87]
5'CAAGGAAGUGAGAAGGCUAGUUA3'
||||||||||||||||||||||x
3'UCUUCGUGAUUCACAGGAUAGUCCGAACUAGUUCCUUCACUCUUCCGAUCAACUGUUCGAAGAAGAACACCUGUAUAUAAACU5' ( -40.80[98.79%] )
>LC-m0128_3p	|ppa022412m|PACid:17647163	|location[65,87]
5'CAAGGAAGUGAGAAGGCUAGUUA3'
x|||||||||||||||||||||x
3'UCUUCGUGAUUCACAGGAUAGUCCGAACUACUUCCUUCACUCUUCCGAUCAACUGUUCGAAGAAGAACACCUGUAUAUAAACU5' ( -37.50[90.80%] )
>LC-m0128_3p	|ppa022782m|PACid:17641789	|location[254,276]
5'CAAGGAAGUGAGAAGGCUAGUUA3'
||||||||||||||||||||||x
3'UCUUCGUGAUUCACAGGAUAAUCCGAACUAGUUCCUUCACUCUUCCGAUCAACUGUUCGAAGAAGAACACCUGUAUAUAAACU5' ( -40.80[98.79%] )
>LC-m0128_3p	|ppa023505m|PACid:17669195	|location[65,87]
5'CAAGGAAGUGAGAAGGCUAGUUA3'
||||||||||||||||||||||x
3'UCUUCGUGAUUCACAGGAUAGUCCGAACUAGUUCCUUCACUCUUCCGAUCAACUGUUCGAAGAAGAACACCUGUAUAUAAACU5' ( -40.80[98.79%] )
>LC-m0128_3p	|ppa024878m|PACid:17660335	|location[65,87]
5'CAAGGAAGUGAGAAGGCUAGUUA3'
||||||||||||||||||||||x
3'UCUUCGUGAUUCACAGGAUAGUCCGAACUAGUUCCUUCACUCUUCCGAUCAACUGUUCGAAGAAGAACACCUGUAUAUAAACU5' ( -40.80[98.79%] )
>LC-m0128_3p	|ppa025522m|PACid:17656075	|location[65,87]
5'CAAGGAAGUGAGAAGGCUAGUUA3'
||||||||||||||||||||||x
3'UCUUCGUGAUUCACAGGAUAGUCCGAACUAGUUCCUUCACUCUUCCGAUCAACUGUUCGAAGAAGAACACCUGUAUAUAAACU5' ( -40.80[98.79%] )
>LC-m0128_3p	|ppb018589m|PACid:17659375	|location[215,237]
5'CAAGGAAGUGAGAAGGCUAGUUA3'
||||||||||||||||||||||x
3'UCUUCGUGAUUCACAGGAUAGUCCGAACUAGUUCCUUCACUCUUCCGAUCAACUGUUCGAAGAAGAACACCUGUAUCUAAACU5' ( -40.80[98.79%] )
>LC-m0128_3p	|ppa017441m|PACid:17654585	|location[23,45]
5'CAAGGAAGUGAGAAGGCUAGUUA3'
||||||||||||||||||||||x
3'UCUUCGUGAUUCACAGGAUAGUCCGAACUAGUUCCUUCACUCUUCCGAUCAACUGUUCGAAGAAGAACACCUGUA5' ( -40.80[98.79%] )
>LC-m0128_3p	|ppa018531m|PACid:17655090	|location[65,87]
5'CAAGGAAGUGAGAAGGCUAGUUA3'
||||||||||||||||||||||x
3'UCUUCGUGAUUCACAGGAUAGUCCGAACUAGUUCCUUCACUCUUCCGAUCAACUGUUCGAAGAAGAACACCUGUAUAUAAACU5' ( -40.80[98.79%] )
>LC-m0128_3p	|ppa019018m|PACid:17651256	|location[23,45]
5'CAAGGAAGUGAGAAGGCUAGUUA3'
||||||||||||||||||||||x
3'UCUUCGUGAUUCACAGGAUAGUCCGAACUAGUUCCUUCACUCUUCCGAUCAACUGUUCGAAGAAGAACACCUGUA5' ( -40.80[98.79%] )
>LC-m0128_3p	|ppa024526m|PACid:17661282	|location[206,228]
5'CAAGGAAGUGAGAAGGCUAGUUA3'
||||o|||||||||||||||||x
3'UCUUCGUGAUGCACAGGAUAGUCCGAACUAGUUCUUUCACUCUUCCGAUCAACUGUUCGAAGAAGAACACCUGUAUAUAAAAU5' ( -37.90[91.77%] )
>LC-m0128_3p	|ppa025157m|PACid:17669160	|location[215,237]
5'CAAGGAAGUGAGAAGGCUAGUUA3'
||||||||||||||||||||||x
3'UCUUCGUGAUUCACAGGAUAGUCCGAACUAGUUCCUUCACUCUUCCGAUCAACUGUUCGAAGAAGAACACCUGUAUCUAAACU5' ( -40.80[98.79%] )
>LC-m0128_3p	|ppb013951m|PACid:17640699	|location[164,186]
5'CAAGGAAGUGAGAAGGCUAGUUA3'
||||||||||||||||||||||x
3'UCUUCGUGAUUCACAGGAUAGUCCGAACUAGUUCCUUCACUCUUCCGAUCAACUGUUCGAAGAAGAACACCUGUAUAUAAACU5' ( -40.80[98.79%] )
>LC-m0128_3p	|ppb018695m|PACid:17660036	|location[23,45]
5'CAAGGAAGUGAGAAGGCUAGUUA3'
||||||||||||||||||||||x
3'UCUUCGUGAUUCACAGGAUAGUCCGAACUAGUUCCUUCACUCUUCCGAUCAACUGUUCGAAGAAGAACACCUGUA5' ( -40.80[98.79%] )
>LC-m0128_3p	|ppa013929m|PACid:17658907	|location[641,663]
5'CAAGGAAGUGAGAAGGCUAGUUA3'
||||||||||||||||||||||x
3'UCUUCGUGAUUCACAGGAUAGUCCGAACUAGUUCCUUCACUCUUCCGAUCAACUGUUCGAAGAAGAACACCUGUAUAUAAACU5' ( -40.80[98.79%] )
>LC-m0128_3p	|ppa014910m|PACid:17657679	|location[65,87]
5'CAAGGAAGUGAGAAGGCUAGUUA3'
||||||||||||||||||||||x
3'UCUUCGUGAUUCACAGGAUAGUCCGAACUAGUUCCUUCACUCUUCCGAUCAACUGUUCGAAGAAGAACACCUGUAUAUAAACU5' ( -40.80[98.79%] )
>LC-m0128_3p	|ppa015616m|PACid:17646832	|location[65,87]
5'CAAGGAAGUGAGAAGGCUAGUUA3'
||||||||||||||||||||||x
3'UCUUCGUGAUUCACAGGAUAAUCCGAACUAGUUCCUUCACUCUUCCGAUCAACUGUUCGAAGAAGAACACCUGUAUAUAAACU5' ( -40.80[98.79%] )
>LC-m0128_3p	|ppa023301m|PACid:17664249	|location[23,45]
5'CAAGGAAGUGAGAAGGCUAGUUA3'
||||||||||||||||||||||x
3'UCUUCGUGAUUCACAGGAUAGUCCGAACUAGUUCCUUCACUCUUCCGAUCAACUGUUCGAAGAAGAACACCUGUA5' ( -40.80[98.79%] )
>LC-m0128_3p	|ppb018532m|PACid:17659671	|location[215,237]
5'CAAGGAAGUGAGAAGGCUAGUUA3'
||||||||||||||||||||||x
3'UCUUCGUGAUUCACAGGAUAGUCCGAACUAGUUCCUUCACUCUUCCGAUCAACUGUUCGAAGAAGAACACCUGUAUCUAAACU5' ( -40.80[98.79%] )
>LC-m0128_3p	|ppb023670m|PACid:17659850	|location[239,261]
5'CAAGGAAGUGAGAAGGCUAGUUA3'
||||||||||||||||||||||x
3'UCUUCGUGAUUCACAGGAUAGUCCGAACUAGUUCCUUCACUCUUCCGAUCAACUGUUCGAAGAAGAACACCUGUAUAUAAACU5' ( -40.80[98.79%] )
>LC-m0128_3p	|ppa015880m|PACid:17650104	|location[23,45]
5'CAAGGAAGUGAGAAGGCUAGUUA3'
||||||||||||||||||||||x
3'UCUUCGUGAUUCACAGGAUAGUCCGAACUAGUUCCUUCACUCUUCCGAUCAACUGUUCGAAGAAGAACACCUGUA5' ( -40.80[98.79%] )
>LC-m0128_3p	|ppa017258m|PACid:17652312	|location[65,87]
5'CAAGGAAGUGAGAAGGCUAGUUA3'
||||||||||||||||||||||x
3'UCUUCGUGAUUCACAGGAUAGUCCGAACUAGUUCCUUCACUCUUCCGAUCAACUGUUCGAAGAAGAACACCUGUAUAUAAACU5' ( -40.80[98.79%] )
>LC-m0128_3p	|ppa017458m|PACid:17667908	|location[65,87]
5'CAAGGAAGUGAGAAGGCUAGUUA3'
||||||||||||||||||||||x
3'UCUUCGUGAUUCACAGGAUAGUCCGAACUAGUUCCUUCACUCUUCCGAUCAACUGUUCGAAGAAGAACACCUGUAUAUAAACU5' ( -40.80[98.79%] )
>LC-m0128_3p	|ppa022711m|PACid:17667630	|location[26,48]
5'CAAGGAAGUGAGAAGGCUAGUUA3'
||||||||||||||||||||||x
3'UCUUCGUGAUUCACAGGAUAGUCCGAACUAGUUCCUUCACUCUUCCGAUCAACUGUUCGAAGAAGAACUCUUUCUGUA5' ( -40.80[98.79%] )
>LC-m0128_3p	|ppa022795m|PACid:17663394	|location[23,45]
5'CAAGGAAGUGAGAAGGCUAGUUA3'
||||||||||||||||||||||x
3'UCUUCGUGAUUCACAGGAUAGUCCGAACUAGUUCCUUCACUCUUCCGAUCAACUGUUCGAAGAAGAACACCUGUA5' ( -40.80[98.79%] )
>LC-m0128_3p	|ppa023925m|PACid:17643191	|location[293,315]
5'CAAGGAAGUGAGAAGGCUAGUUA3'
||||||||||||||||||||||x
3'UCUUCGUGAUUCACAGGAUAGUCCGAACUAGUUCCUUCACUCUUCCGAUCAACUGUUCGAAGAAGAACACCUGUAUAUAAACU5' ( -40.80[98.79%] )
>LC-m0128_3p	|ppb018745m|PACid:17656331	|location[215,237]
5'CAAGGAAGUGAGAAGGCUAGUUA3'
||||||||||||||||||||||x
3'UCUUCGUGAUUCACAGGAUAGUCCGAACUAGUUCCUUCACUCUUCCGAUCAACUGUUCGAAGAAGAACACCUGUAUCUAAACU5' ( -40.80[98.79%] )
>LC-m0128_3p	|ppb020072m|PACid:17655300	|location[215,237]
5'CAAGGAAGUGAGAAGGCUAGUUA3'
||||||||||||||||||||||x
3'UCUUCGUGAUUCACAGGAUAGUCCGAACUAGUUCCUUCACUCUUCCGAUCAACUGUUCGAAGAAGAACACCUGUAUAUAAACU5' ( -40.80[98.79%] )
>LC-m0128_3p	|ppb017438m|PACid:17643670	|location[164,186]
5'CAAGGAAGUGAGAAGGCUAGUUA3'
||||||||||||||||||||||x
3'UCUUCGUGAUUCACAGGAUAGUCCGAACUAGUUCCUUCACUCUUCCGAUCAACUGUUCGAAGAAGAACACCUGUAUAUAAACU5' ( -40.80[98.79%] )
>LC-m0128_3p	|ppa014875m|PACid:17665652	|location[23,45]
5'CAAGGAAGUGAGAAGGCUAGUUA3'
||||||||||||||||||||||x
3'UCUUCGUGAUUCACAGGAUAGUCCGAACUAGUUCCUUCACUCUUCCGAUCAACUGUUCGAAGAAGAACACCUGUA5' ( -40.80[98.79%] )
>LC-m0128_3p	|ppa018720m|PACid:17642546	|location[23,45]
5'CAAGGAAGUGAGAAGGCUAGUUA3'
||||||||||||||||||||||x
3'UCUUCGUGAUUCACAGGAUAGUCCGAACUAGUUCCUUCACUCUUCCGAUCAACUGUUCGAAGAAGAACACCUGUA5' ( -40.80[98.79%] )
>LC-m0128_3p	|ppa021304m|PACid:17649670	|location[65,87]
5'CAAGGAAGUGAGAAGGCUAGUUA3'
||||||||||||||||||||||x
3'UCUUCGUGAUUCACAGGAUAGUCCGAACUAGUUCCUUCACUCUUCCGAUCAACUGUUCGAAGAAGAACACCUGUAUAUAAACU5' ( -40.80[98.79%] )
>LC-m0128_3p	|ppa023246m|PACid:17643248	|location[65,87]
5'CAAGGAAGUGAGAAGGCUAGUUA3'
||||||||||||||||||||||x
3'UCUUCGUGAUUCACAGGAUAGUCCGAACUAGUUCCUUCACUCUUCCGAUCAACUGUUCGAAGAAGAACACCUGUAUAUAAACU5' ( -40.80[98.79%] )
>LC-m0128_3p	|ppa026327m|PACid:17641306	|location[65,87]
5'CAAGGAAGUGAGAAGGCUAGUUA3'
||||||||||||||||||||||x
3'UCUUCGUGAUUCACAGGAUAGUCCGAACUAGUUCCUUCACUCUUCCGAUCAACUGUUCGAAGAAGAACACCUGUAUAUAAACU5' ( -40.80[98.79%] )
>LC-m0128_3p	|ppb025199m|PACid:17660576	|location[197,219]
5'CAAGGAAGUGAGAAGGCUAGUUA3'
||||||||||||||||||||||x
3'UCUUCGUGAUUCACAGGAUAGUUCGAACUAGUUCCUUCACUCUUCCGAUCAACUGUUCGAAGAAGAACACCUGUAUCUAAACU5' ( -40.80[98.79%] )
>LC-m0128_3p	|ppa015690m|PACid:17649013	|location[65,87]
5'CAAGGAAGUGAGAAGGCUAGUUA3'
||||||||||||||||||||||x
3'UCUUCGUGAUUCACAGGAUAGUCCGAACUAGUUCCUUCACUCUUCCGAUCAACUGUUCGAAGAAGAACACCUGUAUAUAAACU5' ( -40.80[98.79%] )
>LC-m0128_3p	|ppa019988m|PACid:17660449	|location[65,87]
5'CAAGGAAGUGAGAAGGCUAGUUA3'
||||||||||||||||||||||x
3'UCUUCGUGAUUCACAGGAUAGUCCGAACUAGUUCCUUCACUCUUCCGAUCAACUGUUCGAAGAAGAACACCUGUAUAUAAACU5' ( -40.80[98.79%] )
>LC-m0128_3p	|ppa022499m|PACid:17657561	|location[293,315]
5'CAAGGAAGUGAGAAGGCUAGUUA3'
||||||||||||||||||||||x
3'UCUUCGUGAUUCACAGGAUAGUCCGAACUAGUUCCUUCACUCUUCCGAUCAACUGUUCGAAGAAGAACACCUGUAUAUAAACU5' ( -40.80[98.79%] )
>LC-m0128_3p	|ppa022900m|PACid:17655264	|location[200,222]
5'CAAGGAAGUGAGAAGGCUAGUUA3'
||||||||||||||||||||||x
3'UCUUCGUGAUUCACAGGAUAGUCCGAACUAGUUCCUUCACUCUUCCGAUCAACUGUUCGAAGAAGAACACCUGUAUAUAAACU5' ( -40.80[98.79%] )
>LC-m0128_3p	|ppa023352m|PACid:17645946	|location[65,87]
5'CAAGGAAGUGAGAAGGCUAGUUA3'
||||||||||||||||||||||x
3'UCUUCGUGAUUCACAGGAUAGUCCGAACUAGUUCCUUCACUCUUCCGAUCAACUGUUCGAAGAAGAACACCUGUAUAUAAACU5' ( -40.80[98.79%] )
>LC-m0128_3p	|ppa023874m|PACid:17651580	|location[65,87]
5'CAAGGAAGUGAGAAGGCUAGUUA3'
||||||||||||||||||||||x
3'UCUUCGUGAUUCACAGGAUAGUCCGAACUAGUUCCUUCACUCUUCCGAUCAACUGUUCGAAGAAGAACACCUGUAUAUAAACU5' ( -40.80[98.79%] )
>LC-m0128_3p	|ppa026348m|PACid:17653754	|location[23,45]
5'CAAGGAAGUGAGAAGGCUAGUUA3'
||||||||||||||||||||||x
3'UCUUCGUGAUUCACAGGAUAGUCCGAACUAGUUCCUUCACUCUUCCGAUCAACUGUUCGAAGAAGAACACCUGUA5' ( -40.80[98.79%] )
>LC-m0128_3p	|ppb014940m|PACid:17648735	|location[215,237]
5'CAAGGAAGUGAGAAGGCUAGUUA3'
||||||||||||||||||||||x
3'UCUUCGUGAUUCACAGGAUAGUCCGAACUAGUUCCUUCACUCUUCCGAUCAACUGUUCGAAGAAGAACACCUGUAUCUAAACU5' ( -40.80[98.79%] )
>LC-m0128_3p	|ppb020100m|PACid:17664297	|location[200,222]
5'CAAGGAAGUGAGAAGGCUAGUUA3'
||||||||||||||||||||||x
3'UCUUCGUGAUUCACAGGAUAGUCCGAACUAGUUCCUUCACUCUUCCGAUCAACUGUUCGAAGAAGAACACCUGUAUAUAAACU5' ( -40.80[98.79%] )
>LC-m0128_3p	|ppb024895m|PACid:17648650	|location[215,237]
5'CAAGGAAGUGAGAAGGCUAGUUA3'
||||||||||||||||||||||x
3'UCUUCGUGAUUCACAGGAUAGUCCGAACUAGUUCCUUCACUCUUCCGAUCAACUGUUCGAAGAAGAACACCUGUAUCUAAACU5' ( -40.80[98.79%] )
>LC-m0128_3p	|ppa015985m|PACid:17657545	|location[23,45]
5'CAAGGAAGUGAGAAGGCUAGUUA3'
||||||||||||||||||||||x
3'UCUUCGUGAUUCACAGGAUAGUCCGAACUAGUUCCUUCACUCUUCCGAUCAACUGUUCGAAGAAGAACACCUGUA5' ( -40.80[98.79%] )
>LC-m0132_3p	|ppa002972m|PACid:17646056	|location[495,515]
5'ACCCCGGGAAGCACACCAUUC3'
|||||o|o|||||x||||||x
3'AGUUUGUGUUGGAAGACUUAUGAUUGAGGUUGGGGUCUUUCGUUUGGUAACGGUAACAAUACUAACGACAAUGAUGAAAAA5' ( -30.20[68.95%] )
>LC-m0132_3p	|ppa001516m|PACid:17664660	|location[2196,2216]
5'ACCCCGGGAAGCACACCAUUC3'
|x|||||||||xx||||||||
3'CAACCUUGUUCAAACGACCUGUUUCUUUAUUCGGGCCCUUCUCGUGGUAAGGCCUUAAGUGGGCGCUGUAGAUCGACGUGG5' ( -30.70[70.09%] )
>LC-m0133_5p	|ppa010859m|PACid:17659595	|location[51,71]
5'CAUUAUAGGAUUUGGGCUUGA3'
|x||x|||||||||||x|||x
3'CGUCUCCUCCGCUCGAGCUUGAAACUAUACGCAAGAUCCUAAACCCAAACCUUAGCGAGGUCGAGACGAUCACUAAAAAGG5' ( -20.50[60.12%] )
>LC-m0133_5p	|ppa000989m|PACid:17666677	|location[1282,1302]
5'CAUUAUAGGAUUUGGGCUUGA3'
||||||x|||||x||x|o|||
3'ACACGAACAAACUUCUCCUUUUCCGACCUGGUAAUACCCUAAUCCGGGACUACCCCUUUAUAUUUGACGACCGGGUCGUAA5' ( -21.60[61.54%] )
>LC-m0133_5p	|ppa020208m|PACid:17663974	|location[268,288]
5'CAUUAUAGGAUUUGGGCUUGA3'
||oo||||||||||||||x|x
3'UUGGAACGGUAGGAACUGUUAUUGUGUUGGGUGGUAUCCUAAACCCGACCAUGUGGGCUAUCGGAAAGAACGUUCGAGGUG5' ( -30.00[85.71%] )
>LC-m0134_5p	|ppa001403m|PACid:17659115	|location[460,480]
5'AAGGAUGAGAAGGGAAGAUGA3'
x||x|||||||||||||x||x
3'GUCUUGUGAGGAUAGGAGUGUGACGACUAACUCGUACUCUUCCCUUCCACGUUGGCUUCCCAGUUGUCUUAACAUGUGGCG5' ( -26.30[69.95%] )
>LC-m0134_5p	|ppa010869m|PACid:17667318	|location[254,274]
5'AAGGAUGAGAAGGGAAGAUGA3'
|x||x||||||||||x||||x
3'UUCGGGUUUUAGACCGUCAUCGUGCUAGUAUACCCACUCUUCCCUCCUACCUCCCUGAGCUACCGGUUUGGAGCAGCUACA5' ( -26.90[71.54%] )
>LC-m0134_5p	|ppa009373m|PACid:17646651	|location[70,90]
5'AAGGAUGAGAAGGGAAGAUGA3'
|||o||||||||o|||x|||x
3'UUAUCUUACUCUCCGAUCCCCAUAAAACCCUUCUUACUCUUCUCUUAUACGCCUCUCUCCCGCACACUUAACCUCUCUCGA5' ( -24.10[65.31%] )
>LC-m0134_5p	|ppa009739m|PACid:17668202	|location[81,101]
5'AAGGAUGAGAAGGGAAGAUGA3'
|||o|||||||xx|||||o||
3'CCCACCCACCUCUCACCUCUAUCUUCUUCUUUCUUACUCUUAACUUCUGCUUAUUCUCCACCUAAAACGAGGGAGACAAAA5' ( -25.20[68.11%] )
>LC-m0134_5p	|ppa010431m|PACid:17642779	|location[71,91]
5'AAGGAUGAGAAGGGAAGAUGA3'
x|||x||||||||||||||ox
3'UACCUCACCGUGCUCAUCUCGUGUUCGAGAGUCCGACUCUUCCCUUCUAUAUCCCCCAAACCCUCCUUCUCUUCCAAGAUC5' ( -29.80[79.26%] )
>LC-m0134_5p	|ppa010673m|PACid:17642781	|location[71,91]
5'AAGGAUGAGAAGGGAAGAUGA3'
x|||x||||||||||||||ox
3'UACCUCACCGUGCUCAUCUCGUGUUCGAGAGUCCGACUCUUCCCUUCUAUAUCCCCCAAACCCUCCUUCUCUUCCAAGAUC5' ( -29.80[79.26%] )
>LC-m0134_5p	|ppa012640m|PACid:17658347	|location[151,171]
5'AAGGAUGAGAAGGGAAGAUGA3'
||||||||||||||xxxx|||
3'AAAGAAGAGUUCCAGACACCCUUGGCUCUCUUCCUACUCUUCCCCAAGACUCUCUCUCAUCAACGUCUCCUUCGGUACCGU5' ( -26.10[70.73%] )
>LC-m0134_5p	|ppa004017m|PACid:17664566	|location[28,48]
5'AAGGAUGAGAAGGGAAGAUGA3'
|||o||x||||||o|x|||||
3'AACAACGGGUUCACUGUCACGUUUCUCUUCUUCUUAGUCUUCCUUCCUACUCUUCACUCUCCCCGAACGAACACGGUA5' ( -22.90[62.06%] )
>LC-m0134_5p	|ppa004274m|PACid:17644347	|location[37,57]
5'AAGGAUGAGAAGGGAAGAUGA3'
|||o||||||||xo||||||x
3'UCAAACCCUGGGUUUACUUCGGUUCCUGUCUUCUUACUCUUCGUUUCUACCCUUCUCUCCUUUCGUACUACCACUAAAACG5' ( -26.70[72.36%] )
>LC-m0134_5p	|ppa006072m|PACid:17650194	|location[1038,1058]
5'AAGGAUGAGAAGGGAAGAUGA3'
x|||||||||||||||||x||
3'AAGAGGACCUUCGUACUUCGGGGAGCAUGGGUCCUACUCUUCCCUUCUUCUCAAGGAGUAACUUUUGACGGACCAGGGUUC5' ( -32.60[86.93%] )
>LC-m0135_5p	|ppa000629m|PACid:17642887	|location[2345,2367]
5'UUUGAUAUUGUUGUAGAUGGGUA3'
|||x||||||||||||||o|o|x
3'CAAGCUACUCUAGUACAUGGACUAUUUUCGAAAGUAUAACAACAUCUAUCUAGACGGAAGUGGUUGUCGUCGUUGUUAACACG5' ( -25.80[73.09%] )
>LC-m0136_5p	|ppa001814m|PACid:17663846	|location[87,109]
5'AGAGAGUGAUUUUAGAAAGGCUA3'
||||||x||||||||||||oxx|
3'CCCUGACUUAUGGUGUGGAGCCCAUAGGCCUCUCUCUCUAAAAUCUUUCUCUUUGAGAACUUUGUCUUUCCGCCGCAAACCCU5' ( -24.40[66.67%] )
>LC-m0138_5p	|ppa024062m|PACid:17664782	|location[380,400]
5'GAGCCAAGGAUGAAUUGCCGG3'
o||||||||||||||||xxo|
3'AUAGUAAGGCUCAUUGACUACUAUAGUUACUUCGGUUCCUACUUAACUUUCAUAGGUGGAGUCAGAAGAGAAGUCCUGAUC5' ( -27.70[65.64%] )
>LC-m0138_5p	|ppa006634m|PACid:17655522	|location[1241,1261]
5'GAGCCAAGGAUGAAUUGCCGG3'
o|||||||o|||||||||||x
3'GGUAAGUAGAUACGGUGUUCGUGUUCUUGUUUCGGUUCUUACUUAACGGCGGACCGUUUGUGUAACGGUUUCUAUAUUGGU5' ( -34.70[82.03%] )
>LC-m0138_5p	|ppa006028m|PACid:17665799	|location[2,22]
5'GAGCCAAGGAUGAAUUGCCGG3'
|||||||||||||x||x||xo
3'GUUGUAGUCAACCGAACUUGGCUUUGGGUCCUCGGUUCCUACUAAAGGGGUA5' ( -29.50[69.91%] )
>LC-m0138_5p	|ppa007941m|PACid:17649823	|location[280,300]
5'GAGCCAAGGAUGAAUUGCCGG3'
|||||||||||||x||x||xo
3'GUUGUAGUCAACCGAACUUUGCUUUGGGUCCUCGGUUCCUACUAAAGGGGUACUCUCAGGGGGAUGGAUUAUUCUUGGGAA5' ( -29.50[69.91%] )
>LC-m0138_5p	|ppa007606m|PACid:17656532	|location[849,869]
5'GAGCCAAGGAUGAAUUGCCGG3'
|xo|||||x|||||||||||o
3'AAGGAAGUGCUCCCGAACUAACUGACGUAACCUGGUUCGUACUUAACGGCUAAGCGGAAGUGGUAAGAGCCAAAAGUGUAG5' ( -30.10[69.84%] )
>LC-m0138_5p	|ppa012173m|PACid:17666161	|location[698,718]
5'GAGCCAAGGAUGAAUUGCCGG3'
o|||||||o||||x|||||x|
3'GUGUUGUGGGUUAUUAAUGUUUUCAUUGGUUUCGGUUCUUACUAAACGGACUAUAUCUGUAACGUGUCGUCCCAAAGUGGG5' ( -29.00[68.72%] )
>LC-m0139_5p	|ppa024062m|PACid:17664782	|location[380,400]
5'GAGCCAAGGAUGAAUUGCCGG3'
o||||||||||||||||xxo|
3'AUAGUAAGGCUCAUUGACUACUAUAGUUACUUCGGUUCCUACUUAACUUUCAUAGGUGGAGUCAGAAGAGAAGUCCUGAUC5' ( -27.70[65.64%] )
>LC-m0139_5p	|ppa006634m|PACid:17655522	|location[1241,1261]
5'GAGCCAAGGAUGAAUUGCCGG3'
o|||||||o|||||||||||x
3'GGUAAGUAGAUACGGUGUUCGUGUUCUUGUUUCGGUUCUUACUUAACGGCGGACCGUUUGUGUAACGGUUUCUAUAUUGGU5' ( -34.70[82.03%] )
>LC-m0139_5p	|ppa006028m|PACid:17665799	|location[2,22]
5'GAGCCAAGGAUGAAUUGCCGG3'
|||||||||||||x||x||xo
3'GUUGUAGUCAACCGAACUUGGCUUUGGGUCCUCGGUUCCUACUAAAGGGGUA5' ( -29.50[69.91%] )
>LC-m0139_5p	|ppa007941m|PACid:17649823	|location[280,300]
5'GAGCCAAGGAUGAAUUGCCGG3'
|||||||||||||x||x||xo
3'GUUGUAGUCAACCGAACUUUGCUUUGGGUCCUCGGUUCCUACUAAAGGGGUACUCUCAGGGGGAUGGAUUAUUCUUGGGAA5' ( -29.50[69.91%] )
>LC-m0139_5p	|ppa007606m|PACid:17656532	|location[849,869]
5'GAGCCAAGGAUGAAUUGCCGG3'
|xo|||||x|||||||||||o
3'AAGGAAGUGCUCCCGAACUAACUGACGUAACCUGGUUCGUACUUAACGGCUAAGCGGAAGUGGUAAGAGCCAAAAGUGUAG5' ( -30.10[69.84%] )
>LC-m0139_5p	|ppa012173m|PACid:17666161	|location[698,718]
5'GAGCCAAGGAUGAAUUGCCGG3'
o|||||||o||||x|||||x|
3'GUGUUGUGGGUUAUUAAUGUUUUCAUUGGUUUCGGUUCUUACUAAACGGACUAUAUCUGUAACGUGUCGUCCCAAAGUGGG5' ( -29.00[68.72%] )
>LC-m0141_5p	|ppa009842m|PACid:17660452	|location[1177,1199]
5'UAUAUUUAUAUUUUCCGUCGUUA3'
||||||||||||||||||||||x
3'GCAUCAUCUUGAUAUGCUCUUACUGCAGCUAUAUAAAUAUAAAAGGCAGCAACAUUUAAUUAAAUUAUGCCGCUAUAAAACAU5' ( -28.80[97.96%] )
>LC-m0142_5p	|ppa008125m|PACid:17667148	|location[1073,1093]
5'AUGCACUAUUUGGUAUGCUGU3'
||xx||||||||||x|||||o
3'CACAACUGCCAACUGACAACUGGCAUCUGAUAACUGAUAAACCAAACGACGGGAAAUCCUAAUCCUCCUUCCGUUCCAUUU5' ( -23.70[67.52%] )
>LC-m0142_5p	|ppa015598m|PACid:17663758	|location[220,240]
5'AUGCACUAUUUGGUAUGCUGU3'
|||||||||||||||||||||
3'CAGUCCUUCUCAAGGUUUUUUUUGGGGUGAUACGUGAUAAACCAUACGACAUUCGAGGGUCUACCUUUACUCGUGUCGACG5' ( -34.90[100.00%] )
>LC-m0142_5p	|ppa011381m|PACid:17652622	|location[338,358]
5'AUGCACUAUUUGGUAUGCUGU3'
||||||x|o|||||||x||x|
3'GUGUGAUAGUAACUAGACCAAGUUCGUUAGUACGUGUUGAACCAUAAGAGACCGGAAGUCAAGGAACUCGAGAGAACAGUG5' ( -22.70[64.86%] )
>LC-m0143_3p	|ppa012437m|PACid:17648072	|location[161,180]
5'AAAGACUAAAAUACCCUUGA3'
|||||||||||xxx|||||x
3'ACGCCUCUAACUUCUCCUCCACCUCCACCUUUUCUGAUUUUCCAGGAACAAUGACGCCAACCCUCGUAGCAGAUCCUCGU5' ( -17.40[60.84%] )
>LC-m0143_3p	|ppa013211m|PACid:17655878	|location[447,466]
5'AAAGACUAAAAUACCCUUGA3'
|x|||||x|||||||||oo|
3'UGAAAUUUUUGAUCGGUUUUUGAGUCAAUUUAUCUGAGUUUAUGGGAGUUAUAAAUUUGAGUGUAUUUUGGAUUCUUCCU5' ( -21.30[74.48%] )
>LC-m0143_3p	|ppa017834m|PACid:17641445	|location[71,90]
5'AAAGACUAAAAUACCCUUGA3'
||||||||||||||||||o|
3'GAAGUGGUGGGAGUGUUUGGAUCUUUUAUCUUUCUGAUUUUAUGGGAAUUUUAUAUACCUUUUAACUUACCACAAUUUCA5' ( -26.30[92.28%] )
>LC-m0146_3p	|ppa019632m|PACid:17640866	|location[379,399]
5'UUAUUGGUCGGGGAUAGCAAA3'
x|||||o|||||x|||||||x
3'CCGUGUUCGAGAUUCUUGUUUUCCCUUGCAUAUAACUAGCCCGUAUCGUUGGGGCAGUCGAUUGUAAGAUGUCAUUUCGUU5' ( -28.30[77.32%] )
>LC-m0146_3p	|ppa020794m|PACid:17652172	|location[1270,1290]
5'UUAUUGGUCGGGGAUAGCAAA3'
||xo|x||||||||||||||x
3'UUAGUACCGUAAGUUAAAAAGACGAGCGUAAAGGAACAGCCCCUAUCGUUCGUAAAGUCGUUCCCACAACGGGGACGAUUG5' ( -28.20[77.05%] )
>LC-m0147_3p	|ppa008024m|PACid:17645464	|location[952,972]
5'CUGAGAUUGGUAGCAGGCUUA3'
x|x|||||o|||||||||x||
3'CCCCAACUUAAGGUAUUCAGGUAAGGCUAUAAGUCUAAUCAUCGUCCGUAUCUCUGUCCGAAGGGUCCGUGACUUCGAACU5' ( -27.40[70.62%] )
>LC-m0148_5p	|ppa026191m|PACid:17668961	|location[1214,1236]
5'AAUCAGAGAGGCCAGUAGAUAGA3'
x|o||||x|||||||||o|||||
3'UCAUUCGAAGACGUACUGUGCUGGUACCUCCUGGUCUAUCCGGUCAUUUAUCUUGAGUAAAACACAGGGGAACUUCGGGAACU5' ( -31.90[76.13%] )
>LC-m0149_3p	|ppa021727m|PACid:17663572	|location[162,182]
5'AGGCAUGGUGAGAUCGGAAAG3'
|x||||||||||||x|o|x||
3'CAAAGCCCCAGCCCCUCCAACUGCUUCAACUACGUACCACUCUAACUUCUCAGACACAAACACUUCUCAAACAGUUUCCCA5' ( -24.50[61.10%] )
>LC-m0149_3p	|ppa004969m|PACid:17656312	|location[989,1009]
5'AGGCAUGGUGAGAUCGGAAAG3'
x||||||x||||||x|x||||
3'UACCACUAGGUUAAUGAAACAUGAAACAUUACCGUACGACUCUACCGUUUCAAACACUUAGCAAGUGUUAACACUAAGCUA5' ( -25.50[63.59%] )
>LC-m0149_3p	|ppa005014m|PACid:17656313	|location[989,1009]
5'AGGCAUGGUGAGAUCGGAAAG3'
x||||||x||||||x|x||||
[truncated: 689 more rows]

## Sheet: LS miRNA-target Alignment File
miRNA Identity	Target Identity	Location
>LS-m0003_3p	|ppa023552m|PACid:17667755	|location[113,132]
5'GGGGAUUUAGUCCAGUGGUA3'
||||||ox|||||||||ox|
3'CUUCUCCCAGAGUUCUUGCUGUACAGCAAGCCCCUAGCUCAGGUCACUCUCGCACUGUCAGGCCUCGAACUCUACUAGGC5' ( -30.80[78.97%] )
>LS-m0004_5p	|ppa014945m|PACid:17647390	|location[150,172]
5'AAUCUGUGAGCUCGUCCAACCUA3'
||||||||||||||||||||||x
3'AAUUUUCAACGUGAGAGGUCCGAGGCAGCUUAGACACUCGAGCAGGUUGGAAUACAAUACAACUUAACCCUUACCUAAAUAA5' ( -42.20[98.83%] )
>LS-m0004_5p	|ppa017445m|PACid:17664329	|location[150,172]
5'AAUCUGUGAGCUCGUCCAACCUA3'
||||||||||||||||||||||x
3'AAUUUUCAACGUGAGAGGUCCGAGGCAGCUUAGACACUCGAGCAGGUUGGAAUACAAUACAACUUAACCCUUACCUAAACAA5' ( -42.20[98.83%] )
>LS-m0005_3p	|ppa012594m|PACid:17663215	|location[504,524]
5'UUUUGGGCAAGGUAGCAUAAG3'
|o|||o|||||xo||||||||
3'GAUCGGCUGUACUAGUUGCCGGUUCUAGAACUCGUUCGGUCGUAUUCUGUGCGGAACCAACAGUAGCGGUGGAGGGU5' ( -28.10[78.49%] )
>LS-m0005_3p	|ppa003074m|PACid:17651829	|location[767,787]
5'UUUUGGGCAAGGUAGCAUAAG3'
||o|||||x||x||||||x||
3'GGGAUGUAGUGAAGGUCAAAGGAAGAAAAAAAGACCCGCUCAAUCGUAAUCAACGGUUCGUUGAGGUGACAGGGUUCGUGC5' ( -21.90[60.16%] )
>LS-m0005_3p	|ppa004781m|PACid:17662693	|location[1219,1239]
5'UUUUGGGCAAGGUAGCAUAAG3'
|||||||||||x|xx|||||x
3'GUUGGGACUGUAGUUGCUCUCGUUCCUAUCAAAACCCGUUCGAGAGUAUUAAUAGUGUAGAUCCAUUGGUAGACUCUUGAA5' ( -23.10[63.99%] )
>LS-m0005_3p	|ppa015790m|PACid:17656910	|location[610,630]
5'UUUUGGGCAAGGUAGCAUAAG3'
||o|||||x||x||||||x||
3'GGGAUGUAGUGAAGGUCAAAGGAAGAAAAAAAGACCCGCUCAAUCGUAAUCAACGGUUCGUUGAGGUGCAUGUAUCAAGUG5' ( -21.90[60.16%] )
>LS-m0007_3p	|ppa004515m|PACid:17652373	|location[1872,1894]
5'UCUAGGAAAUAGAAAUUGUAGGG3'
|||||||||||||||ox||||||
3'AUAUAUCUAAAGUUUUAAUUACUCAACUGCAGAUCCUUUAUCUUUGCCAUCCCGAUAGGGAUGAAAGAAGAAAUUAAAGUGAC5' ( -32.70[89.59%] )
>LS-m0008_3p	|ppa014776m|PACid:17654130	|location[310,330]
5'AAGAUUAGAAGUAUGUAACCA3'
|xx|||||||||||||xx|||
3'UCGGGACAUUCUUCUAAACUGUGAUUUUCUUGGUAAUCUUCAUACAAAGGUUUAUCCUCUCAGUCCAAAUGUUGUAUUGAG5' ( -19.20[63.79%] )
>LS-m0014_3p	|ppa006634m|PACid:17655522	|location[1241,1261]
5'CAGCCAAGGAUGACUUGCCGG3'
x|||||||o||||x||||||x
3'GGUAAGUAGAUACGGUGUUCGUGUUCUUGUUUCGGUUCUUACUUAACGGCGGACCGUUUGUGUAACGGUUUCUAUAUUGGU5' ( -30.00[68.65%] )
>LS-m0014_3p	|ppa012173m|PACid:17666161	|location[698,718]
5'CAGCCAAGGAUGACUUGCCGG3'
x|||||||o||||x|||||x|
3'GUGUUGUGGGUUAUUAAUGUUUUCAUUGGUUUCGGUUCUUACUAAACGGACUAUAUCUGUAACGUGUCGUCCCAAAGUGGG5' ( -28.00[64.22%] )
>LS-m0016_5p	|ppa017541m|PACid:17646881	|location[1070,1090]
5'UGGGAUUGGGUGGGUUUGGUA3'
|o|||||x|||||||||x|x|
3'CAAACCCUCAACUUCUUCCCUUACACUUCCAUCCUAAACCACCCAAAGCCUUAAAUCCCAAAUCUCAACUCUAUUGACCGC5' ( -26.10[63.35%] )
>LS-m0016_5p	|ppa015910m|PACid:17667547	|location[690,710]
5'UGGGAUUGGGUGGGUUUGGUA3'
||o|x|x||||||||||||x|
3'CCUCCUCCUCCUCUUCUCGCAACAACGUCAACUCGACCCCACCCAAACCUUCACUCUCCUUCGUCUUCAACCCACUUCCCU5' ( -28.60[69.08%] )
>LS-m0016_5p	|ppa006894m|PACid:17659692	|location[538,558]
5'UGGGAUUGGGUGGGUUUGGUA3'
x|o|||||||||x||||||x|
3'CGAACCGGGGCCAGACCUCCGUGUGCACCGCCUCUAACCCACGCAAACCCUACUGCCUUAAGUUCUGCAACGCCUUGUAUC5' ( -29.80[71.63%] )
>LS-m0016_5p	|ppa013258m|PACid:17651150	|location[420,440]
5'UGGGAUUGGGUGGGUUUGGUA3'
|||||||||||||||||||||
3'CCCUUUCCCUCUUUCUCCAACUCCUUCAAAACCCUAACCCACCCAAACCAUUCUUUUGAACUAGUAUAUAGAGUUACUUGA5' ( -41.50[100.00%] )
>LS-m0016_5p	|ppa020409m|PACid:17648249	|location[82,102]
5'UGGGAUUGGGUGGGUUUGGUA3'
||||x|||o|||xx|||||||
3'ACCCGAAUAAAAUGAUGGUCUCCUACUACUACCCAAACUCACAGAAACCAUCAGUGAUAACAUGCCAUUACCGUCACUUCC5' ( -25.40[61.65%] )
>LS-m0016_5p	|ppa004219m|PACid:17642166	|location[797,817]
5'UGGGAUUGGGUGGGUUUGGUA3'
|||ox|||||||x||o|||||
3'ACCGAAGUAGCACAACCGGCGCGAGUUAGUACCUCAACCCACACAGACCAUCUUGUUCCCUCGGUUAACACUAAUAUUCUC5' ( -28.40[68.93%] )
>LS-m0016_5p	|ppb024620m|PACid:17661629	|location[233,253]
5'UGGGAUUGGGUGGGUUUGGUA3'
x|||||||||||x|x|x||||
3'CCUUCUUCCUCUUACAAAAAAACACCUCCCUCCCUAACCCACACCACCCAUAUCCCAACACCCACACCCCUCUCUCAAACC5' ( -29.70[71.91%] )
>LS-m0016_5p	|ppa000218m|PACid:17654152	|location[119,139]
5'UGGGAUUGGGUGGGUUUGGUA3'
|||||xx||||||x||||o||
3'UUCAUUUUUGUAUUAGAGAAUACCUCUUGAACCCUUCCCCACCGAAACUAUCUAGAUGAUGGAGACCUUUCCUGCCUCAAA5' ( -29.20[70.53%] )
>LS-m0016_5p	|ppa011071m|PACid:17669311	|location[275,295]
5'UGGGAUUGGGUGGGUUUGGUA3'
||||x|||||||||x||||o|
3'AACAUCCGCAACCUCAUCCCCGGAGCCCCAACCCAAACCCACCCCAACCGUCUCAUACCCAUCGGCGGCAACCCGACCCGC5' ( -32.60[78.74%] )
>LS-m0016_5p	|ppa000560m|PACid:17662031	|location[266,286]
5'UGGGAUUGGGUGGGUUUGGUA3'
x|||||||||||x|x|x||||
3'CUUCGAAGACCUCCUUGAAAACCACCUCCCUCCCUAACCCACGCCACCCAUAUCCCAACACCCACACCCCUCUCUCAAACC5' ( -29.70[71.91%] )
>LS-m0018_3p	|ppa015313m|PACid:17653536	|location[671,692]
5'UUGCCUAUUCCUCCCAUGCCAA3'
|||||x|||||x|||||x|||x
3'ACCAAUAUUCGUCAGAACCGUUACCACCAGAACGGUUAAGGUGGGUAGGGUAUCUGAUGUCGAUGAGGUUGUAGUGAACUAG5' ( -29.60[69.16%] )
>LS-m0018_3p	|ppa025931m|PACid:17641814	|location[665,686]
5'UUGCCUAUUCCUCCCAUGCCAA3'
|||||x|||||x|||||x|||x
3'ACCAAUAUUCGUCAGAACCGUUACCACCAGAACGGUUAAGGUGGGUAGGGUAUCUGAUGUCGAUGAGGUUGUAGUGAACUAG5' ( -29.60[69.16%] )
>LS-m0018_3p	|ppa017433m|PACid:17649403	|location[668,689]
5'UUGCCUAUUCCUCCCAUGCCAA3'
||x||||||||x|x|||||||x
3'CAUAAUAUUUGUCUGAAACGUUACCAACAGAAGGGAUAAGGUGAGUACGGUAUUUAAUGUUCAUACGGCUGUAGUAGACUAG5' ( -27.20[63.55%] )
>LS-m0018_3p	|ppa022023m|PACid:17662758	|location[491,512]
5'UUGCCUAUUCCUCCCAUGCCAA3'
||x||||||||x|x|||||||x
3'CAUAAUAUUUGUAUGAAACGUUACCAACAGAAGGGAUAAGGUGAGUACGGUAUUUAAUGUUCAUACGGCUGUAGUAGACUAG5' ( -27.20[63.55%] )
>LS-m0018_3p	|ppa026003m|PACid:17641205	|location[674,695]
5'UUGCCUAUUCCUCCCAUGCCAA3'
||x||||||||x|x|||||||x
3'CAUAAUACUUCUCUGAAACGUUACCAACAGAAGGGAUAAGGUGAGUACGGUAUUUAAUGUUCAUAUGGCUGUAGUAGACUAG5' ( -27.20[63.55%] )
>LS-m0018_3p	|ppb014730m|PACid:17641227	|location[617,638]
5'UUGCCUAUUCCUCCCAUGCCAA3'
||||||||o|||x||x|o||||
3'AACAACUUAUAGUUAACCGUUUCACAACAAAACGGAUAGGGAAGGGAUGGUUGUUACGGAUGACGGAACUUGGCUAGUACUG5' ( -31.60[73.83%] )
>LS-m0018_3p	|ppa020719m|PACid:17658044	|location[227,248]
5'UUGCCUAUUCCUCCCAUGCCAA3'
|||||||oo||x|||||x||||
3'AGUAACAUUUCGUCAGCCCGUUCCCAACAGAACGGAUGGGGCGGGUAAGGUUGUUACCACUCCUGUCUGUGUAGUAGGAACG5' ( -30.70[71.73%] )
>LS-m0018_3p	|ppa000953m|PACid:17660995	|location[590,611]
5'UUGCCUAUUCCUCCCAUGCCAA3'
||x||o|||||||||||x|||x
3'AGUAGUAUCUGAACGAACCGGUUCCACCAGAAGGGGUAAGGAGGGUAAGGUCGGUUGCUUUGAUGAAGCGCCGGUCUUGACG5' ( -31.80[74.30%] )
>LS-m0018_3p	|ppa026111m|PACid:17662995	|location[509,530]
5'UUGCCUAUUCCUCCCAUGCCAA3'
||x|||||x||||||||x|||x
3'AGUAGUAUUUGAAAGAAGUGGUUCCACCAGAAGGGAUACGGAGGGUAAGGUCACUGACUUUGAUGAAGUGCAGGUCUCGGUG5' ( -27.10[63.17%] )
>LS-m0018_3p	|ppa019385m|PACid:17654769	|location[620,641]
5'UUGCCUAUUCCUCCCAUGCCAA3'
|||||x|||||x|||||x|||x
3'ACCAAUAUUCGUCAGAACCGUUACCACCAGAACGGUUAAGGUGGGUAGGGUAUCUGAUGUCGAUGAGGUUGUAGUGAACUAG5' ( -29.60[69.16%] )
>LS-m0018_3p	|ppa001090m|PACid:17658188	|location[703,724]
5'UUGCCUAUUCCUCCCAUGCCAA3'
||x|||||x||o||||||||x|
3'ACUACUAUUUGGAGAAAACGUUCUCAUCAGAAAGGAUAUGGGGGGUACGGGUUAUAUCGUUAUUGACCUAGAAGUAAAACAA5' ( -31.10[72.66%] )
>LS-m0018_3p	|ppa016819m|PACid:17665151	|location[635,656]
5'UUGCCUAUUCCUCCCAUGCCAA3'
||x||||x|||||||||x||x|
3'AGUAAUAUCUGAUUGACCCGUUUCCGUCAAAAAGGAUUAGGAGGGUAGGGGUGUUACCCCUAGUGUUUACCCGAGAAGGGAA5' ( -28.70[67.06%] )
>LS-m0018_3p	|ppa021718m|PACid:17647832	|location[626,647]
5'UUGCCUAUUCCUCCCAUGCCAA3'
|||||||||||x|||||x||x|
3'ACCAAUAUUUACCGAGCCCGUUCACAACAAAACGGAUAAGGUGGGUAGGGGUUUUAAGGUUGAUACGCUUGUAGUAGACUAG5' ( -33.10[77.34%] )
>LS-m0018_3p	|ppa014763m|PACid:17662144	|location[311,332]
5'UUGCCUAUUCCUCCCAUGCCAA3'
||x||||||||x|x|||||||x
3'CUUAAUAUUUGUCUGAAACGUUACCAACAGAAGGGAUAAGGUGAGUACGGUAUUUAAUGUUCAUACGGUUGUAGUAAACUAG5' ( -27.20[63.55%] )
>LS-m0018_3p	|ppa018842m|PACid:17663628	|location[638,659]
5'UUGCCUAUUCCUCCCAUGCCAA3'
|||||o||x||||||||x||x|
3'AGUAAUAUCCGAUCAACCCAAUUUCAACAAAACGGGUACGGAGGGUAGGGCUGUUAUCCCUACUAUUCCUUGGGGAAGGGAA5' ( -32.90[76.87%] )
>LS-m0018_3p	|ppa021551m|PACid:17643473	|location[638,659]
5'UUGCCUAUUCCUCCCAUGCCAA3'
|||||o||x||||||||x||x|
3'AGUAAUAUCCGAUCAACCCAAUUUCAACAAAACGGGUACGGAGGGUAGGGCUGUUAUCCCUACUAUUCCUUGGGGAAGGGAA5' ( -32.90[76.87%] )
>LS-m0018_3p	|ppa023828m|PACid:17649287	|location[377,398]
5'UUGCCUAUUCCUCCCAUGCCAA3'
||x||||||||x|x|||||||x
3'CUUAAUAUUUGUUUGAAACGUUACCAACAGAAGGGAUAAGGUGAGUACGGUAUUUAAUGUUCAUACGGUUGUAGUAGACUAG5' ( -27.20[63.55%] )
>LS-m0018_3p	|ppa001182m|PACid:17644336	|location[554,575]
5'UUGCCUAUUCCUCCCAUGCCAA3'
||o||||ox||||||||||||x
3'AAUAACAACUAGAACCAGUUUUCCCAUCAGAAUGGAUGUGGAGGGUACGGUAUGUUCGGUUAUUAAGGGUGAACGAGAAGAA5' ( -36.70[85.75%] )
>LS-m0018_3p	|ppa015899m|PACid:17667665	|location[581,602]
5'UUGCCUAUUCCUCCCAUGCCAA3'
|||||x|||||||||||x||x|
3'GAGAAUAUCCGUUCAACCCGUUCUCAACAGAACGGUUAAGGAGGGUAGGGAUAUUAUCCCUACUGUUCCGUCCAACGGGGAG5' ( -33.00[76.92%] )
>LS-m0018_3p	|ppa016447m|PACid:17664281	|location[635,656]
5'UUGCCUAUUCCUCCCAUGCCAA3'
||x||o|||||||||||x||x|
3'AGUAAUAUCCGAUCAACACGUUCUCAACAGAAAGGGUAAGGAGGGUAGGGGUGUUACCCCUAUUGUUCCCCUGGGCAAUGUU5' ( -31.60[73.83%] )
>LS-m0018_3p	|ppa017700m|PACid:17654457	|location[419,440]
5'UUGCCUAUUCCUCCCAUGCCAA3'
|||||x||o||||||||x||x|
3'GUAUUGGGUUACUCAAACCGUUCUCAACAGAACGGUUAGGGAGGGUAGGGAUAUUAUCCCUACUGUUCCGUCCAGCGGGGAG5' ( -32.50[75.76%] )
>LS-m0018_3p	|ppa020323m|PACid:17666995	|location[614,635]
5'UUGCCUAUUCCUCCCAUGCCAA3'
|||||x||o||||||||x||x|
3'AGUAAUAUCCGUUCAACCCGUUCUCAACAGAACGGUUAGGGAGGGUAGGGAUAUUAUCCCUACUGUUCCGUCCAGCGGGGAG5' ( -32.50[75.76%] )
>LS-m0018_3p	|ppa021014m|PACid:17665584	|location[599,620]
5'UUGCCUAUUCCUCCCAUGCCAA3'
||o||x|||||||||||x||x|
3'AGUAAUAUACGUUCAACCCGUUCUCAACAGAAUGGUUAAGGAGGGUAGGGAUGUUAACCCUACUGUUCCUUCAAACCGGAAC5' ( -31.00[72.43%] )
>LS-m0018_3p	|ppa022649m|PACid:17656454	|location[617,638]
5'UUGCCUAUUCCUCCCAUGCCAA3'
|||||x|||||||||||x||x|
3'AGCAAUAUCUGUUCAACCCGUUCUCAACAGAACGGUUAAGGAGGGUAGGGAUAUUAUCCCUACUGUUCCGUCCAACGGGGAG5' ( -33.00[76.92%] )
>LS-m0018_3p	|ppa025816m|PACid:17650752	|location[455,476]
5'UUGCCUAUUCCUCCCAUGCCAA3'
|||||o|||||||||||x||x|
3'AGUAAUAUCCGAUCAACCCGUUCUCAACAGAACGGGUAAGGAGGGUAGGGAUUUUAUCUCUGCUGUUCUCCUGGGGAGAGGA5' ( -37.20[86.92%] )
>LS-m0018_3p	|ppa017946m|PACid:17669245	|location[317,338]
5'UUGCCUAUUCCUCCCAUGCCAA3'
||||||xx|||||||||x||x|
3'AACCACUUUCGGGAACGUUGAUCUCAACAGAACGGACUAGGAGGGUAGGGGUUGUGCCUCUGUUAUCAAACCGCAACGAGAA5' ( -32.30[75.47%] )
>LS-m0018_3p	|ppa024822m|PACid:17655911	|location[605,626]
5'UUGCCUAUUCCUCCCAUGCCAA3'
|||||x||o|||||||||||x|
3'AACAACAUAUGCUCGACUCGUUCUCACCAGAACGGCUAGGGAGGGUACGGGUGUUACCCUUGGUGUGAAUAAAAUAAAAGUC5' ( -36.80[85.98%] )
>LS-m0018_3p	|ppa016254m|PACid:17668240	|location[449,470]
5'UUGCCUAUUCCUCCCAUGCCAA3'
|||||x||||||||x||o||||
3'AGCAAUAUACGGUUGACUCAUUCUCAACAGAACGGUUAAGGAGGUUAUGGUUAAUAACCUUAUGUUCAACGUAUAGGUAGGA5' ( -29.90[69.70%] )
>LS-m0018_3p	|ppa018717m|PACid:17664914	|location[497,518]
5'UUGCCUAUUCCUCCCAUGCCAA3'
||o||x||||||||x|||||x|
3'AGUAAUAUACUGUAAACUCGUUCUCACCAGAAUGGUUAAGGAGGCUACGGCUACUAACCUUACGUACAGCGUAUACUUGUUG5' ( -29.10[67.83%] )
>LS-m0018_3p	|ppa021797m|PACid:17667495	|location[587,608]
5'UUGCCUAUUCCUCCCAUGCCAA3'
|||||||xo||||||||x|||x
3'ACUACCAUUUGGAAGGAUCGGUCUCACCAGAACGGAUUGGGAGGGUAAGGUGUAUAACUUUGGUGAGCUGACGGCCUCAAAG5' ( -31.60[73.83%] )
>LS-m0018_3p	|ppa022038m|PACid:17667143	|location[581,602]
5'UUGCCUAUUCCUCCCAUGCCAA3'
||x||x||||||||||||||x|
3'AGCAACAUGUACUGAACACGUUCUCGACAGAAAGGUUAAGGAGGGUACGGAUGUUCACGCUAGUGUGCUUGAACAACAACGA5' ( -32.10[75.00%] )
>LS-m0018_3p	|ppa022091m|PACid:17654712	|location[674,695]
5'UUGCCUAUUCCUCCCAUGCCAA3'
||o||||||||o||x|||||x|
3'GAGAGCAUUUGUUGAGACCGUUGUCAACAGAAUGGAUAAGGGGGUUACGGGUUUUAGGGAUACCGUGUUUGAAAUACGUCGG5' ( -32.40[75.70%] )
>LS-m0018_3p	|ppa022198m|PACid:17647367	|location[374,395]
5'UUGCCUAUUCCUCCCAUGCCAA3'
||o||x||||||||x||o||||
3'AGUAAUAUAGGGUUAACUCGUUCUCACCAGAAUGGUUAAGGAGGUUAUGGUUUAUAACUUUAUGUACAACGUAUAGGAAGGA5' ( -27.80[64.95%] )
>LS-m0018_3p	|ppa1027179m|PACid:17658650	|location[686,707]
5'UUGCCUAUUCCUCCCAUGCCAA3'
||o||||||||o||x|||||x|
3'GAGAGCAUUUGUUGAGAACGUUGUCAACAGAAUGGAUAAGGGGGUUACGGGUUUUAGGGAUACUGUGUUUGAAAUACGUCGG5' ( -32.40[75.70%] )
>LS-m0018_3p	|ppb022444m|PACid:17664258	|location[1139,1160]
5'UUGCCUAUUCCUCCCAUGCCAA3'
||||||||x||x|||||x|||x
3'CACUUUUGUUGAAGAAGGUGGUUCCAACAUAACGGAUAUGGCGGGUAAGGUGUAUAAUGUUGGCCUAACUAAACUAGUAGAC5' ( -27.00[63.38%] )
>LS-m0018_3p	|ppa001015m|PACid:17660055	|location[1305,1326]
5'UUGCCUAUUCCUCCCAUGCCAA3'
|||||x|x|||||||||o||||
3'AACAGUAUAUGAAAGAACCGUUCUCACCAGAACGGUUCAGGAGGGUAUGGUUCGUGACUAUAGUGAAGUGCCGCAAGUACAA5' ( -33.30[77.99%] )
>LS-m0018_3p	|ppa001315m|PACid:17643516	|location[582,603]
5'UUGCCUAUUCCUCCCAUGCCAA3'
|||||||||||||||||x||xx
3'CAUAGUUUGUGGUGAACACGUUCUCAACAGAACGGAUAAGGAGGGUAGGGGGUAUAGGGAUUCGAUACUUGUAGAAAUGUGU5' ( -37.30[87.15%] )
>LS-m0018_3p	|ppa015920m|PACid:17642956	|location[554,575]
5'UUGCCUAUUCCUCCCAUGCCAA3'
|||||x|x|||||||||o||||
3'GACAGUAUUUGAAAGAACCGUUCUCACCAGAACGGUUCAGGAGGGUAUGGUUCGUGGUUUUAGUGAUGUGCCGCAAGUACAA5' ( -33.30[77.99%] )
>LS-m0018_3p	|ppa016138m|PACid:17658303	|location[575,596]
5'UUGCCUAUUCCUCCCAUGCCAA3'
|||||||oo||x|||||x||||
3'AGUAACAUUUCGUCAGCCCGUUCCCAACAGAACGGAUGGGGCGGGUAAGGUUGUUACCACUCCUGUCUGUGUAGUAGGAACG5' ( -30.70[71.73%] )
>LS-m0018_3p	|ppa021541m|PACid:17662924	|location[575,596]
5'UUGCCUAUUCCUCCCAUGCCAA3'
|||||x||o||x|||||x||||
3'AGUAAUAUUUCGUCAGCCCGUUCCCAACAGAACGGUUAGGGUGGGUAAGGUUGUUACCACUCCUGUCUGUGUAGUAGGAAUG5' ( -27.00[63.08%] )
>LS-m0018_3p	|ppa023276m|PACid:17657302	|location[674,695]
5'UUGCCUAUUCCUCCCAUGCCAA3'
||x||x|||||||||||x|||x
3'GCCAAUAUUCGUCGAAACCGUUACCACCAGAAAGGUUAAGGAGGGUAGGGUAUCUAGUGUCGAUGUGGUUGUCGUAAACUAG5' ( -28.40[66.36%] )
>LS-m0019_5p	|ppa003578m|PACid:17653567	|location[214,234]
5'UUUGGAAUGAGCGUGUUGGAA3'
||x||||x||||o|||||||x
3'GAAAAGUUAACUUAGUUUCUCGAAUACCCUAACCCUUUCUCGUACAACCUGACUUUUGGACGGUUUCAGUAUCUGUAACCG5' ( -26.40[73.54%] )
>LS-m0019_5p	|ppa000538m|PACid:17651196	|location[2040,2060]
5'UUUGGAAUGAGCGUGUUGGAA3'
|||o||x|o|||o||||||||
3'CAGUUCAACAAUAUUCUUUUUAGUUUCGACAAAUCUGAUUCGUACAACCUUUUACGACUACCCUACCUGGGACUCUCUACC5' ( -25.70[71.99%] )
>LS-m0019_5p	|ppa013273m|PACid:17658595	|location[5,25]
5'UUUGGAAUGAGCGUGUUGGAA3'
|||x||||||||||x||||xx
3'CUAAACAUCAUUAAUUCUCCUUCUCUCUGCAAAACUUACUCGCAGAACCACUUCA5' ( -24.90[69.75%] )
>LS-m0019_5p	|ppa017059m|PACid:17649718	|location[380,400]
5'UUUGGAAUGAGCGUGUUGGAA3'
|||||||||||x||||||oxx
3'GACUCUAAAGAUGACGAUAGAAGUAAGCGUAAACCUUACUCUCACAACUACUAGGAAACGAAAAAGGUACUUAUACGAGCA5' ( -25.80[72.07%] )
>LS-m0020_3p	|ppa015660m|PACid:17657187	|location[1915,1935]
5'CAUUAGAGCGGUGGUACACAA3'
||||||||x||||x||x|||x
3'UAAACUACUUUCUAGUUACGAGAAAUGGUCGUAAUCUCACCACAAUAUGUGCUCAAGAAGGGGAAAAUUACAGUCGUGCCA5' ( -24.20[64.36%] )
>LS-m0022_3p	|ppa012829m|PACid:17654037	|location[198,220]
5'GAAGUGAGGAUGAGAUUGAGAGA3'
o||x|||||||||||x|||o|||
3'CUUAUUUUAUUUACCACCCCACUCCAACCCUUUAACUCCUACUCUUACUUUCUUAAACCCUUAUACUUUUGGCAAAGACCUUU5' ( -30.00[71.60%] )
>LS-m0023_3p	|ppa000083m|PACid:17652147	|location[5632,5654]
5'AAGCAGGAUUUGUCAGUGGGCUU3'
||x||o|||||xx||||||||||
3'GUUUUUGUGUCCAGUUAGUAGGGUUUCCUGUUAGUUCUAAAGUGUCACCCGAAGUGACGGUACACGGAGAGCUAGUUAAACAG5' ( -27.20[62.67%] )
>LS-m0025_3p	|ppa008110m|PACid:17661760	|location[767,786]
5'AGGGGAAGGUAGCUAGCAUU3'
x||x||||||||||x|||x|
3'GAGUCAUUGUCGUAGUUGACGUUAUGUAGAACCACUUCCAUCGAACGUCAAGGUAUACUACACAUGUCGGAAGAGGUCAA5' ( -25.10[65.03%] )
>LS-m0025_3p	|ppa026953m|PACid:17651806	|location[677,696]
5'AGGGGAAGGUAGCUAGCAUU3'
|||o|x|||||||o|x||||
3'GCGAAGACUAUUUGGUAAACCGCCUUGAAAUCCUCAUCCAUCGGUGGUAAACAGUAGAAAAGAGAAACGUAAAGGAAAGA5' ( -26.40[68.39%] )
>LS-m0025_3p	|ppa000336m|PACid:17647225	|location[817,836]
5'AGGGGAAGGUAGCUAGCAUU3'
|||||||||||||oxx||x|
3'CGUUGGCCUUAAUUCCUACCUCCAAGAACUUCCCCUUCCAUCGGAAGUUACCCUUUAGAUUUCCCCGCCCGGGGUUUUAA5' ( -29.00[76.32%] )
>LS-m0025_3p	|ppa000669m|PACid:17647226	|location[817,836]
5'AGGGGAAGGUAGCUAGCAUU3'
|||||||||||||oxx||x|
3'CGUUGGCCUUAAUUCCUACCUCCAAGAACUUCCCCUUCCAUCGGAAGUUACCCUUUAGAUUUCCCCGCCCGGGGUUUUAA5' ( -29.00[76.32%] )
>LS-m0025_3p	|ppa001937m|PACid:17640390	|location[1303,1322]
5'AGGGGAAGGUAGCUAGCAUU3'
|||||||oo||x||||||x|
3'GCUAAUUCGUAAGAUUGUGUGGAGUUAGAUUCCCCUUUUAUAGAUCGUCAACCUUGAUCUGCCCGAUGGGGUAUUUAAUA5' ( -24.70[65.00%] )
>LS-m0025_3p	|ppa009527m|PACid:17650700	|location[109,128]
5'AGGGGAAGGUAGCUAGCAUU3'
|||o||x|||||||||xx||
3'AACCUUCUCCUCCGCCCCAACUCUAAUUCAUCCUCUCCCAUCGAUCCCAAACCCUCAGCUGUUCACCUGCGCUUUGCGAC5' ( -24.90[64.51%] )
>LS-m0025_3p	|ppb020688m|PACid:17648469	|location[94,113]
5'AGGGGAAGGUAGCUAGCAUU3'
|o|x||x||||||||||||x
3'CUCCGGAGAUUCUGUAGUACCGGUGAGCAGUUCGCUACCAUCGAUCGUACUCACCUCUACGAGAGUCAUUUCCUACUGGC5' ( -26.10[67.79%] )
>LS-m0027_3p	|ppa009397m|PACid:17656533	|location[1000,1020]
5'UGCCAAAGAAGAGUUGCCCUA3'
ox|||||||||||||||xx||
3'UUUUAGAGGUAUUGUUCGUUCACGUAGGUAGAGGUUUCUUCUCAACGUAAUGGAGAGUCAUAAGAGACAAGUUUGUUCCUU5' ( -27.40[69.90%] )
>LS-m0027_3p	|ppa015730m|PACid:17660744	|location[338,358]
5'UGCCAAAGAAGAGUUGCCCUA3'
x||||||||||x||||x||||
3'UUAGCUUUCUGACUCUUCCUUUGAACAAUUCCGGUUUCUUCACAACCGGAUACUUCGGUAACCUCCCCCACGGUUUCCGGU5' ( -25.70[65.73%] )
>LS-m0027_3p	|ppa003154m|PACid:17650304	|location[866,886]
5'UGCCAAAGAAGAGUUGCCCUA3'
|x||||||||||||o|||||x
3'AUUCGUCGUCGACUAAACUCGUCGAAGUCGAAGGUUUCUUCUCAGCGGGAGCCAUAUUAUAGUCGGUUUCUGCUCUCCGUA5' ( -34.00[86.96%] )
>LS-m0027_3p	|ppa004613m|PACid:17651940	|location[338,358]
5'UGCCAAAGAAGAGUUGCCCUA3'
x||||||||||x||||x||||
3'UUAGCUUUCUGACUCUUCCUUUGAACAAUUCCGGUUUCUUCACAACCGGAUACUUCGGUAACCUCCCCCACGGUUUCCGGU5' ( -25.70[65.73%] )
>LS-m0027_3p	|ppa024435m|PACid:17650881	|location[248,268]
5'UGCCAAAGAAGAGUUGCCCUA3'
xo||||||||||x|||||||x
3'GAAAGAAAGAAGGGUUAAACAGUGGUUCGGUUGGUUUCUUCUGAACGGGACGGUUACACGGUGUUUCACGGUGUGGUAACU5' ( -31.30[79.85%] )
>LS-m0027_3p	|ppa025234m|PACid:17662545	|location[248,268]
5'UGCCAAAGAAGAGUUGCCCUA3'
x|||||||||||||||||||x
3'GAAAAAAGGAUGGUUCAAAUAGAGGUUCGGUCGGUUUCUUCUCAACGGGACGAUCCCAAGGUUUGUUUCGUUGGGGUCAAU5' ( -37.50[95.66%] )
>LS-m0028_5p	|ppa005679m|PACid:17651251	|location[7,27]
5'GGAUUGUUUAGUGUGCGGAUU3'
|||x|||o||||o||||||||
3'ACACAAAGCAUGCAGUUGAAAAACCGCGCACCUUACAGAUCAUACGCCUAAAAAAAC5' ( -31.70[86.38%] )
>LS-m0029_3p	|ppa014776m|PACid:17654130	|location[310,330]
5'AAGAUUAGAAGUAUGUAACCA3'
|xx|||||||||||||xx|||
3'UCGGGACAUUCUUCUAAACUGUGAUUUUCUUGGUAAUCUUCAUACAAAGGUUUAUCCUCUCAGUCCAAAUGUUGUAUUGAG5' ( -19.20[63.79%] )
>LS-m0033_3p	|ppa026316m|PACid:17666307	|location[667,689]
5'GACCAAUAUAUUUCGUCGCGCAA3'
|||||||x||||||||||x|||x
3'GUUAUAUAAAGCAGCGCGUUUGUAAACGCGCUGGUUACAUAAAGCAGCCCGUGUUUAAACGCCAUCUCAUCUAGCUAGUACCA5' ( -30.60[76.69%] )
>LS-m0034_5p	|ppa006193m|PACid:17654543	|location[110,132]
5'UGGGGAUUGGGUUGUGAGGUGGA3'
|||||x||||||o|||x|||||x
3'CGUUAACCGCCCAGACAAUUACCUCCAAGAACCCCAAACCCAGCACACCACCAUAGCAAACCAAACCAAACACGCCUGCUCAG5' ( -38.00[78.67%] )
>LS-m0035_5p	|ppa016935m|PACid:17647108	|location[203,223]
5'CAAGAAGUGGAAGUUUUGGGC3'
|||o|xx|||||||||||||x
3'AAUUUGCUAUGCACGGUUAGGUUUUAGACCUUCAAAACCCAAGUACAAGAGUAGGUUCUCUUACAAUGACU5' ( -25.30[66.75%] )
>LS-m0035_5p	|ppa003697m|PACid:17643450	|location[1290,1310]
5'CAAGAAGUGGAAGUUUUGGGC3'
xx||||||o|||||||||||x
3'UUCGUAUCUUAAUCUAUCUCCCCAAACGUCACUCUUCAUCUUCAAAACCCUCUUAGUUCCUCUCUGACAACCUAACGGUAU5' ( -28.10[75.74%] )
>LS-m0035_5p	|ppa008363m|PACid:17664684	|location[854,874]
5'CAAGAAGUGGAAGUUUUGGGC3'
||||||o|||||x|x||||o|
3'UCAUUGUCAUAGACACGACUGUCCCUUCUCGUUCUUUACCUUGACAACCUGACCGGACCGUUUACCCCGUUCAUUUCAGUA5' ( -24.60[66.49%] )
>LS-m0035_5p	|ppa026501m|PACid:17665908	|location[1384,1404]
5'CAAGAAGUGGAAGUUUUGGGC3'
||||xx||||||x||||||o|
3'ACACAAAUAUGCUCACCCAACGCUUUGGCCGUUCAACACCUUGAAAACCUGCCAUAUCAUCAGGUACUAUUGCACCUCUGA5' ( -24.60[66.31%] )
>LS-m0035_5p	|ppa000022m|PACid:17668739	|location[5081,5101]
5'CAAGAAGUGGAAGUUUUGGGC3'
||||||||||||xxo||||o|
3'AGGUCCUAGGUUCAGACUCUAUGUGUGCCCGUUCUUCACCUUGUGAACCUGAUGAUGUCGAGUAGUUCGGUCAACCUCAUA5' ( -26.80[72.43%] )
>LS-m0035_5p	|ppa000023m|PACid:17668740	|location[5081,5101]
5'CAAGAAGUGGAAGUUUUGGGC3'
||||||||||||xxo||||o|
3'AGGUCCUAGGUUCAGACUCUAUGUGUGCCCGUUCUUCACCUUGUGAACCUGAUGAUGUCGAGUAGUUCGGUCAACCUCAUA5' ( -26.80[72.43%] )
>LS-m0035_5p	|ppa000024m|PACid:17668741	|location[5081,5101]
5'CAAGAAGUGGAAGUUUUGGGC3'
||||||||||||xxo||||o|
3'AGGUCCUAGGUUCAGACUCUAUGUGUGCCCGUUCUUCACCUUGUGAACCUGAUGAUGUCGAGUAGUUCGGUCAACCUCAUA5' ( -26.80[72.43%] )
>LS-m0036_5p	|ppb023941m|PACid:17664379	|location[83,105]
5'CGUAAAAGGAUAUUUAGACGACA3'
||||||||||||||||||||||x
3'AAAAACAACAAAGCAAAAUUUGUUUAGGCUGCAUUUUCCUAUAAAUCUGCUGCAAAACCAAAGUAUAUAUACAACACAAGAAU5' ( -35.20[100%] )
>LS-m0037_5p	|ppa005679m|PACid:17651251	|location[7,27]
5'GGAUUGUUUAGUGUGCGGAUU3'
|||x|||o||||o||||||||
3'ACACAAAGCAUGCAGUUGAAAAACCGCGCACCUUACAGAUCAUACGCCUAAAAAAAC5' ( -31.70[86.38%] )
>LS-m0039_3p	|ppa012437m|PACid:17648072	|location[161,180]
5'AAAGACUAAAAUACCCUUGA3'
|||||||||||xxx|||||x
3'ACGCCUCUAACUUCUCCUCCACCUCCACCUUUUCUGAUUUUCCAGGAACAAUGACGCCAACCCUCGUAGCAGAUCCUCGU5' ( -17.40[60.84%] )
>LS-m0039_3p	|ppa013211m|PACid:17655878	|location[447,466]
5'AAAGACUAAAAUACCCUUGA3'
|x|||||x|||||||||oo|
3'UGAAAUUUUUGAUCGGUUUUUGAGUCAAUUUAUCUGAGUUUAUGGGAGUUAUAAAUUUGAGUGUAUUUUGGAUUCUUCCU5' ( -21.30[74.48%] )
>LS-m0039_3p	|ppa017834m|PACid:17641445	|location[71,90]
5'AAAGACUAAAAUACCCUUGA3'
||||||||||||||||||o|
3'GAAGUGGUGGGAGUGUUUGGAUCUUUUAUCUUUCUGAUUUUAUGGGAAUUUUAUAUACCUUUUAACUUACCACAAUUUCA5' ( -26.30[92.28%] )
>LS-m0040_3p	|ppa004159m|PACid:17655917	|location[661,681]
5'ACAGGCAGUCUCCUUGGCUAC3'
x||||||||||||ox||x|||
3'AAUAGUAGUGUCAGUUUGUACUCGAGGUUCAGUCCGUCAGAGGGUCCCAUGGAGGAUUCUUCGACGUUUUACGGGGUAUAU5' ( -31.70[74.41%] )
>LS-m0040_3p	|ppa002300m|PACid:17662624	|location[295,315]
5'ACAGGCAGUCUCCUUGGCUAC3'
||||x||||||x|||||||xx
3'AGAAGCCGGUGGGAACUUCGUUGACUGACCUGUCGGUCAGAAGAACCGACCCAUGUACGAUAAUGUGCGGGUGGUAGUCGG5' ( -28.20[65.73%] )
>LS-m0041_3p	|ppa006863m|PACid:17648415	|location[27,47]
5'ACAACUGGUUGUGGGCCCAAC3'
|||||o|x|||||||x|||x|
3'GUUGAGGCUCUGCUGAAGAAGAAGUGCCGGUGUUGGCGAACACCCAGGUGGCCGUGGUGAAGGGGCAGAGCUCGGUA5' ( -27.40[64.32%] )
>LS-m0041_3p	|ppa010829m|PACid:17646670	|location[269,289]
5'ACAACUGGUUGUGGGCCCAAC3'
|x||x|||||||||||x|x||
3'CCACCCAAAAUAACACUUAAAGACUCUUUAUAUUUACCAACACCCGUGGUGGCGUCAAGAGUUGUUAGAGACCAGGUUGAU5' ( -26.40[62.41%] )
>LS-m0041_3p	|ppa025198m|PACid:17655776	|location[815,835]
5'ACAACUGGUUGUGGGCCCAAC3'
||||x|o||||||||||x||x
3'AGUAAGGUGAGUUCAGUCCAUCUCCCGGACUGUUCAUCAACACCCGGUUUAAAUUAAGCAACUGUAAGCAUUCCAACAAUU5' ( -25.70[61.34%] )
>LS-m0044_3p	|ppa005104m|PACid:17643812	|location[36,56]
5'UGAAGGAAGAGAUAGAAGCGC3'
x|||||||||||x|||||x|x
3'UCUCCCUCCCACUAAAACCUCCUCUCCCAAUCUUCCUUCUCUCUCUUCUCUCUCCAAUCUCACUCUUCCCUGAACCCUAAC5' ( -24.40[63.05%] )
>LS-m0044_3p	|ppa011173m|PACid:17659923	|location[400,420]
5'UGAAGGAAGAGAUAGAAGCGC3'
||||o|||||||o|||x|x||
3'UUCGUCGUCGUCGUCGUCGACCUCGUCCGUACUUUCUUCUCUGUCUCCACGGCCACCCUUACAUUUGUCCGUUUCUCCCUU5' ( -26.00[68.06%] )
>LS-m0044_3p	|ppa000071m|PACid:17641456	|location[5355,5375]
5'UGAAGGAAGAGAUAGAAGCGC3'
|oxx||||||||x||||||||
3'GACCGGUGUAAAUCUACCAUGUGUUAAGGUAUAACCUUCUCUUUCUUCGCGUCUCGUUCUUGUUAGAGGGUUUUGGCAGGG5' ( -28.60[74.87%] )
>LS-m0044_3p	|ppa003608m|PACid:17659190	|location[62,82]
5'UGAAGGAAGAGAUAGAAGCGC3'
x|||||||||||x|||||x|x
3'UAGCGUGAGACGGGCACUCCGUAACAAACCCCUUCCUUCUCUCUCUUCACCACCACCACCUCGCUUCCGGUUACUAGCAAC5' ( -24.60[64.23%] )
>LS-m0044_3p	|ppa001536m|PACid:17651855	|location[1342,1362]
5'UGAAGGAAGAGAUAGAAGCGC3'
||||o||x||||||x|x||||
3'GAAUACCUAUAGCCGUCUGACUAAUAGUCAACUUUCUCCUCUAUGUCCGCGACUUAGGUGUUAGACGAGGAAGGAGAAGAG5' ( -23.60[61.14%] )
>LS-m0044_3p	|ppa006916m|PACid:17665064	|location[1292,1312]
5'UGAAGGAAGAGAUAGAAGCGC3'
||x|||x|||||x||||||o|
3'AGACUGAAGCUUUCCUCUAAUAACUGGUUGACGUCCGUCUCUCUCUUCGUGUAUAAAAUGAGAACUCCGAAAAGGGUGAAG5' ( -23.60[61.46%] )
>LS-m0044_3p	|ppa025514m|PACid:17668420	|location[4,24]
5'UGAAGGAAGAGAUAGAAGCGC3'
x||||||||||x||o||||o|
3'GUCUUUCUUGUUUUCUUGACCAUCUUCGUUCCUUCCUUCUCAAUUUUCGUGGUA5' ( -27.70[72.51%] )
>LS-m0044_3p	|ppb015337m|PACid:17644827	|location[24,44]
5'UGAAGGAAGAGAUAGAAGCGC3'
x|||||||||||xx||||x||
3'CGUUACUGUCUCUUCCCGUCCUCGUCCUUCUCUUCCUUCUCUUCCUUCUCGUCUACUCCCUCUUGUUUUCGGUA5' ( -26.10[68.50%] )
>LS-m0044_3p	|ppa003474m|PACid:17646994	|location[12,32]
5'UGAAGGAAGAGAUAGAAGCGC3'
x|||||||||||x|||||x|x
3'UCGUCACUUUUCAACAUCUCUUCUCUUUCCUCUUCCUUCUCUCUCUUCCCAUCAAAACCGUA5' ( -24.60[64.57%] )
>LS-m0044_3p	|ppa009980m|PACid:17667059	|location[177,197]
5'UGAAGGAAGAGAUAGAAGCGC3'
|||||ox||||x||||||||x
3'UCGUUUUCUCCACGCCGCUACCUCCACUUCACUUCUCUCUCGAUCUUCGCCAAGAACCUUCUUACCCUCUCUUAGAACUGC5' ( -25.90[67.62%] )
>LS-m0044_3p	|ppa013385m|PACid:17658910	|location[40,60]
5'UGAAGGAAGAGAUAGAAGCGC3'
||||||x|||||x||||||xx
3'CGAGUUCAAAUGUUUCUAUUUCUCACACACACUUCCAUCUCUCUCUUCGAAUAUUUUGCUCCCUUAUUGGCUAGCAACCGA5' ( -25.70[67.45%] )
>LS-m0044_3p	|ppa016222m|PACid:17640567	|location[721,741]
5'UGAAGGAAGAGAUAGAAGCGC3'
x|||||||||||x||||x|x|
3'CCAUCAACACCACCACCAUUAACCGUAACUUCUUCCUUCUCUCUCUUAGGGUCGACACCUUGGUCGUCGUAUUCCGACUAC5' ( -23.30[60.99%] )
>LS-m0048_5p	|ppa015104m|PACid:17640678	|location[636,656]
5'UCAUUGUACACAGAUUGGGCA3'
|||||||||||||||||||||
3'GAGAACACCUUUACUCAACAAUGUAAAACCAGUAACAUGUGUCUAACCCGUUUUCGUCAGAACGGGUUGGGAGGGUAGGGA5' ( -37.00[100.00%] )
>LS-m0048_5p	|ppa018378m|PACid:17647994	|location[669,689]
5'UCAUUGUACACAGAUUGGGCA3'
|||||||||||||||||||||
3'GAGAACACCUUUACUCAACAAUGUAAAACCAGUAACAUGUGUCUAACCCGUUUUCGACAGAACGGGUUGGGAGGGUAGGGA5' ( -37.00[100.00%] )
>LS-m0048_5p	|ppa020993m|PACid:17641341	|location[633,653]
5'UCAUUGUACACAGAUUGGGCA3'
|||||||||||x||o|x|||x
3'AAAAACAACUUUAUGAGUAGCUAUCGUGGAAGUAACAUGUGACUGAACCGGUUUCAACAGAAAGGGUCAGGACCGUAAGGG5' ( -25.40[68.10%] )
>LS-m0048_5p	|ppa027225m|PACid:17654029	|location[633,653]
5'UCAUUGUACACAGAUUGGGCA3'
|||||||||||x||o|x|||x
3'GAAAAAAGUUUUAUGAAAUAAUGACUUAAUAGUAACAUGUGACUGAACCGGUUUCAACAGAAAGGGUCGGGACGGUAAGGG5' ( -25.20[67.92%] )
>LS-m0048_5p	|ppa1027210m|PACid:17642559	|location[633,653]
5'UCAUUGUACACAGAUUGGGCA3'
||||||||x|||||o|x|||x
3'AAACCUAGUUUUAUGGGAAAAUAUCUUAAUAGUAACAUAUGUCUGAACCGGUUUCAACAGAAAGGAUCCGGACGGUAAGGG5' ( -24.50[66.04%] )
>LS-m0048_5p	|ppa006059m|PACid:17651430	|location[272,292]
5'UCAUUGUACACAGAUUGGGCA3'
||x|||||x||||||||o|||
3'UAUCGGCUCCUUUAGAUAGGAGGUAUCGAAAGGAACAUCUGUCUAACUCGUUGGUUAGCAGUAGGCUGUGUAGUGAUCGUG5' ( -24.00[64.34%] )
>LS-m0050_3p	|ppa002642m|PACid:17651285	|location[537,557]
5'UCAGAUGGUAGCAAGGAUGCA3'
|||||x|x||||||||xx|||
3'AAGUCGCAUCACAACCUUCUUAUGUACAAGAGUCUUCGAUCGUUCCCUCGUCAAAGAGAGUAUAGUUUCCGAACACGGAGG5' ( -25.10[63.07%] )
>LS-m0050_3p	|ppa004616m|PACid:17667056	|location[512,532]
5'UCAGAUGGUAGCAAGGAUGCA3'
||||||||x||x||o||||||
3'GGUCGUCCACUAACCCAUCGUCUACCACCUAGUCUACCCUCCUUUCUACGUCCUCUUCUACCUCCCCGUUACUUCCCAUGA5' ( -25.70[64.90%] )
>LS-m0051_3p	|ppa019632m|PACid:17640866	|location[379,399]
5'UUAUUGGUCGGGGAUAGCAAA3'
x|||||o|||||x|||||||x
3'CCGUGUUCGAGAUUCUUGUUUUCCCUUGCAUAUAACUAGCCCGUAUCGUUGGGGCAGUCGAUUGUAAGAUGUCAUUUCGUU5' ( -28.30[77.32%] )
>LS-m0051_3p	|ppa020794m|PACid:17652172	|location[1270,1290]
5'UUAUUGGUCGGGGAUAGCAAA3'
||xo|x||||||||||||||x
3'UUAGUACCGUAAGUUAAAAAGACGAGCGUAAAGGAACAGCCCCUAUCGUUCGUAAAGUCGUUCCCACAACGGGGACGAUUG5' ( -28.20[77.05%] )
>LS-m0052_5p	|ppb024333m|PACid:17653323	|location[968,989]
5'UCCAACCGGGGGAUCGUUUGAC3'
||||||||||||||||||||||
3'GAUCCAUGGCCCCUUUGUUAGGUUGGCCCCCUAGCAAACUGAUCGGGCGUCCUAAAGGUCCAACAUAGGAC5' ( -45.00[100.00%] )
>LS-m0053_3p	|ppa022857m|PACid:17648526	|location[1211,1233]
5'AAGGUUAAAAUUGUGAGUGGACA3'
||x|||||||||||x|||||||x
3'AGGAACCCGAGGGACCGGCUCUUAAGAUAAUUACAAUUUUAACAGUCACCUGAAGAGGUUGAGGAAGCUGAACUUGUUGAACU5' ( -27.60[75.62%] )
>LS-m0055_3p	|ppb013742m|PACid:17654509	|location[7,28]
5'CGAAUUAUUUUUCGUCGCGCAU3'
||||oxx||||||||||||||x
3'GCUGUGAUGAUGUUAAAUGAUAAACGCGCUGCUUGUAAAAAAGCAGCGCGUUUUUCGU5' ( -27.70[81.23%] )
>LS-m0058_5p	|ppa010552m|PACid:17664768	|location[1002,1022]
5'UCCAGUGGAAGGUGAGUGCUG3'
||||||||x||o||xo|||||
3'UGAGAGUAAAAACCGUUACGUAUUCUGUAAAGGUCACCAUCUACCUACGACUCUUUACGUUUCCUAGUCCUAUACGUCAGC5' ( -30.10[69.68%] )
>LS-m0059_3p	|ppa002329m|PACid:17656919	|location[567,587]
5'UUUGCAAGUAGAAAGGAUGCC3'
|||x||||o|||x|||||x||
3'CCGACAUUUAAACAGCAUGGAGUAGACUACAAAAGUUCGUCUGUCCUAGGGUAAAACAAACGGGGAGGUACCGUCUCAACC5' ( -21.80[60.89%] )
>LS-m0060_3p	|ppa005248m|PACid:17642251	|location[230,250]
5'AAGUGGACAAAAGGGGAGUGG3'
|xx|||||||||||||x|x||
3'AGGUUUCAACUACUCUCCAGCUUACAAAACUAAACCUGUUUUCCCCACCCCCUACACUGUUUCCUCUUACACAAGCAAAAC5' ( -25.90[64.91%] )
>LS-m0060_3p	|ppa021467m|PACid:17667661	|location[81,101]
5'AAGUGGACAAAAGGGGAGUGG3'
|||xo||||||||||x|||||
3'AGUUCAUACCACGGACCCUUAAGUCACAGCUUCCUCUGUUUUCCCAUCACCCGUUAACGCCGGAGUUACUCUCGUUUGAGC5' ( -27.10[67.92%] )
>LS-m0061_5p	|ppa019765m|PACid:17655115	|location[134,154]
5'GGAAUGUUGUCUGGCUCGAGG3'
o||x||||||||||||||xx|
3'AGUAUGGAGCUGGUCAGAAACUUAGUAGUCUCUAACAACAGACCGAGCAACCAAGACAGAGUCGUCUACUACUUCGUUUGA5' ( -29.60[70.14%] )
>LS-m0061_5p	|ppa000948m|PACid:17648147	|location[2175,2195]
5'GGAAUGUUGUCUGGCUCGAGG3'
ox||||||||||||||x||o|
3'UUAUCUCGUCCGUUAUGUCUUCGUUCAACAUAUUACAACAGACCGACCUUCCUCCUACCGUCCCGGCGAGCUGACGAUUCG5' ( -27.70[64.27%] )
>LS-m0061_5p	|ppa023304m|PACid:17651862	|location[134,154]
5'GGAAUGUUGUCUGGCUCGAGG3'
o||x||||||||||||||xx|
3'AGUAUGGAGCUGGUCAGAAACUUAGUAGUCUCUAACAACAGACCGAGCAACCAAGACAGAGUCGUCUACUACUUCGUUUGA5' ( -29.60[70.14%] )
>LS-m0061_5p	|ppa019730m|PACid:17660625	|location[807,827]
5'GGAAUGUUGUCUGGCUCGAGG3'
xx||||||||||||x|||||x
3'UCGUAAAGGUUUAACAUGUUGAGUUAUAUAGGUUACAACAGACCCAGCUCGAGAAGGUACUAGUUACGACGUAUAAGGAGU5' ( -27.60[63.74%] )
>LS-m0062_5p	|ppa003686m|PACid:17661262	|location[385,405]
5'GCAGCAUCACCAAGAUUCACA3'
|||||x||x|||||||xx|||
3'AGUAUCAAGUGUAAGACUUGGUAAUAAACUCGUCGGAGCGGUUCUAUAUGUAUUAGAAAGAGUUUUCUUGCAUGUUAACUA5' ( -23.90[60.66%] )
>LS-m0062_5p	|ppa006750m|PACid:17646981	|location[538,558]
5'GCAGCAUCACCAAGAUUCACA3'
o|||||o||||x|||||||x|
3'UAGAGGUACCUACUAAAGGGUUGGGUACGUUGUCGUGGUGGAUCUAAGUUUAGUCACAGUUGUGCCUAUCCAAAAAAGUCU5' ( -28.30[71.83%] )
>LS-m0062_5p	|ppa009067m|PACid:17657150	|location[723,743]
5'GCAGCAUCACCAAGAUUCACA3'
|||o||||x||||||||x|||
3'AACGUGUUGGAGGGUAACGAGGUACGGACUCGUUGUAGGGGUUCUAACUGUUCCUCUCACGGACCCGUUCCUAGUUGACCC5' ( -26.00[66.16%] )
>LS-m0062_5p	|ppa000214m|PACid:17648084	|location[591,611]
5'GCAGCAUCACCAAGAUUCACA3'
||||xx||||||||xx|||||
3'AAACUGGAACUGUGGGGGGAGUAUAAGGUUCGUCAGAGUGGUUCCCAGUGUAACAGAGGACGUAGAGAUGAUCAUGAUGAG5' ( -26.30[66.75%] )
>LS-m0062_5p	|ppa013829m|PACid:17659972	|location[303,323]
5'GCAGCAUCACCAAGAUUCACA3'
||||||||||||||||ox|xx
3'AACUAACGCAAGAACUGUUAGAAAAACCUCCGUCGUAGUGGUUCUAGUUUACGGCGUAUAUAGUCGGUUGGACUAUUCCAU5' ( -30.60[78.87%] )
>LS-m0062_5p	|ppa022250m|PACid:17645438	|location[849,869]
5'GCAGCAUCACCAAGAUUCACA3'
o||||||||||||xx|||x||
3'GGUAAAGAGAGGUAGAGUACAUUUUGUCUAUGUCGUAGUGGUUAAAAGGGUAAUCUCGUCUCUGGUACAUAGUCUGAUCAU5' ( -25.90[64.91%] )
>LS-m0062_5p	|ppa025975m|PACid:17648761	|location[228,248]
5'GCAGCAUCACCAAGAUUCACA3'
||x|||||||||xx|||||x|
3'UAAAAAAGUUGAACUGCCUAGUGAACUAGUCGGCGUAGUGGUCGUAAGUAUCGAGCAUCUCGAGAUUCGUCAGAUAGAGAA5' ( -23.60[60.20%] )
>LS-m0062_5p	|ppa013907m|PACid:17662133	|location[425,445]
5'GCAGCAUCACCAAGAUUCACA3'
x||o|||||||||||x|||x|
3'AGUAGUUAAAGAUGUCUUCAUUGUUAAAGAAGUUGUAGUGGUUCUUAGUAUAAGUUCACAACUAGUAUUCGUACCUCAAAU5' ( -26.70[66.92%] )
>LS-m0062_5p	|ppa014009m|PACid:17662134	|location[425,445]
5'GCAGCAUCACCAAGAUUCACA3'
x||o|||||||||||x|||x|
3'AGUAGUUAAAGAUGUCUUCAUUGUUAAAGAAGUUGUAGUGGUUCUUAGUAUAAGUUCACAACUAGUAUUCGUACCUCAAAU5' ( -26.70[66.92%] )
>LS-m0062_5p	|ppa014013m|PACid:17662135	|location[630,650]
5'GCAGCAUCACCAAGAUUCACA3'
x||o|||||||||||x|||x|
3'AGUAGUUAAAGAUGUCUUCAUUGUUAAAGAAGUUGUAGUGGUUCUUAGUAUAAGUUCACAACUAGUAUUCGUACCUCAAAU5' ( -26.70[66.92%] )
>LS-m0062_5p	|ppa002642m|PACid:17651285	|location[1176,1196]
5'GCAGCAUCACCAAGAUUCACA3'
x|||x||||||||||||||xx
3'AGUCGAUCUUGUAAUCAGUGUAAUUGUUUGAGUCCUAGUGGUUCUAAGUAGGAGUGGCGCUUAUGUACAAAGUUCCUGAGC5' ( -25.70[64.57%] )
>LS-m0062_5p	|ppa012082m|PACid:17651108	|location[337,357]
5'GCAGCAUCACCAAGAUUCACA3'
||||||||||||||xox|x||
3'UUGACAGUGCUCUCGGAGGGUGAAGCCCAACGUCGUAGUGGUUCGGUGGGUGAACUCGGUAACGGAGUUAGUACUCUUGAG5' ( -33.20[83.42%] )
>LS-m0062_5p	|ppa025000m|PACid:17649586	|location[789,809]
5'GCAGCAUCACCAAGAUUCACA3'
ox||||||x||||x|||||||
3'GAGAACAUGAAGGGUAAUGAGGUAUAGAGUUAUCGUAGAGGUUGUAAGUGUUGCUCUCGCAAACCUUAACCGAAGUGGCCU5' ( -24.30[61.83%] )
>LS-m0062_5p	|ppa013901m|PACid:17653716	|location[163,183]
5'GCAGCAUCACCAAGAUUCACA3'
x||o|||||||||||x|||x|
3'AGUAGUUAAAGAUAUCUUCAUUGUUGAAGAAGUUGUAGUGGUUCUUAGUAUAAAUUCACAACUAGUAUUCGUACCUCAAAU5' ( -26.70[66.92%] )
>LS-m0062_5p	|ppa020170m|PACid:17647271	|location[219,239]
5'GCAGCAUCACCAAGAUUCACA3'
|x||||||||||xo|x|||||
3'UUUAAUAGUGACUUCUCGUCGAAUCGGUUUCUUCGUAGUGGUGUUUAGUGUUGAGAUUCGUUUCGUUCUCCUCAGGGUGUA5' ( -23.70[60.31%] )
>LS-m0064_5p	|ppa012426m|PACid:17657501	|location[715,735]
5'UAAAAGAAAAGGAUGUGCUAA3'
||||||x||||||||||x||x
3'UCGGGUGUUAUAUUAGUGUCUUUGAUAUAUAUUUUCCUUUCCUACACAAUCUAGGAAAAACGUGUAGGUGAACUAGAUUAU5' ( -19.00[63.55%] )
>LS-m0064_5p	|ppa008959m|PACid:17652151	|location[1168,1188]
5'UAAAAGAAAAGGAUGUGCUAA3'
|||x|x|||||||||||||||
3'GUACGUUGUGAAUUAUAUACCGUUGUGUUUAUUGUAUUUUCCUACACGAUUAAUGUCAUGUUCUAGACUAAGGAGUUCUGU5' ( -22.50[75.00%] )
>LS-m0066_3p	|ppa006419m|PACid:17640862	|location[407,427]
5'AACAAAACUAUAGGAAGACUC3'
||||||x|o||||||x||||x
3'UAUUCGUCGACUGGAUGCUAGUUUCAUCAGUUGUUUAGGUAUCCUACUGAAUAGAAAAGAAUACUCGAACGUAGGAAGUUC5' ( -20.80[65.20%] )
>LS-m0066_3p	|ppa008982m|PACid:17649966	|location[1175,1195]
5'AACAAAACUAUAGGAAGACUC3'
||||x|||o|||||||x||x|
3'CCGUCAACACUCUAUUUAAAAUAUCUUAUGUUGUGUUGGUAUCCUUGUGUGCUCCACUUGAGUUAUAGUAAUUUAGGGAAG5' ( -20.70[64.29%] )
>LS-m0067_5p	|ppa001976m|PACid:17650566	|location[392,414]
5'UAUGGAAAUGUGGUAUACAAAUG3'
||||o||||||||||o|x|||x|
3'CAAAACACUCCGUCUCUACCACUCUAGUCGAUACUUUUACACCAUGUCUUUUCGUCUCAACUUCUUCGCUCUACCCAUUCUCU5' ( -22.40[65.12%] )
>LS-m0068_5p	|ppa000591m|PACid:17643219	|location[561,581]
5'UCAUUAUAAAGGAGCUGAGCG3'
||||o|xx||||||||||||x
3'UCCAUGGUGUCCUCGCUGGUACUUCGUCGGAGUAGUUCUUCCUCGACUCGGAAGACGGAGUAGUUGAACAGGAGAUGAUAU5' ( -30.90[84.66%] )
>LS-m0068_5p	|ppa000343m|PACid:17655980	|location[627,647]
5'UCAUUAUAAAGGAGCUGAGCG3'
|||||||||||||||||||||
3'GAUUCUAAUUUUACGAGAAAGUGAAACAGUAGUAAUAUUUCCUCGACUCGCUCCCAGCAGAACGGUUGGGGCGGGUAAGGG5' ( -35.90[100.00%] )
>LS-m0068_5p	|ppa000391m|PACid:17667187	|location[633,653]
5'UCAUUAUAAAGGAGCUGAGCG3'
|||||||||||||||||||||
3'GAUUCUAAUUUUACGAGAAAGUGAAAAAGUAGUAAUAUUUCCUCGACUCGCUCCCAACAGAACGGUUGGGGCGGGUAAGGG5' ( -35.90[100.00%] )
>LS-m0068_5p	|ppa019071m|PACid:17651510	|location[633,653]
5'UCAUUAUAAAGGAGCUGAGCG3'
|||||||||||||||||||||
3'GAUUCUAAUUUUACGAGAAAGUGAAAAAGUAGUAAUAUUUCCUCGACUCGCUCCCAACAGAACGGUUGGGGCGGGUAAGGG5' ( -35.90[100.00%] )
>LS-m0068_5p	|ppa023899m|PACid:17647794	|location[348,368]
5'UCAUUAUAAAGGAGCUGAGCG3'
|||||x||||||||x|||||o
3'AGUUAUAGUUUUGUGAGAAAGUGAAGCAGUAGUAACAUUUCCUCAACUCGUUCGCAACAGAAUGGUUGGGCGGGUAGGGUU5' ( -24.40[67.97%] )
>LS-m0068_5p	|ppa026310m|PACid:17662333	|location[618,638]
5'UCAUUAUAAAGGAGCUGAGCG3'
|||||||||||||||||||||
3'GAUUCUAAUUUUACGAGAAAGUGAAACAGUAGUAAUAUUUCCUCGACUCGCUCCCAACAGAACGGUUGGGGCGGGUAAGGG5' ( -35.90[100.00%] )
>LS-m0070_5p	|ppa000591m|PACid:17643219	|location[561,581]
5'UCAUUAUAAAGGAGCUGAGCG3'
||||o|xx||||||||||||x
3'UCCAUGGUGUCCUCGCUGGUACUUCGUCGGAGUAGUUCUUCCUCGACUCGGAAGACGGAGUAGUUGAACAGGAGAUGAUAU5' ( -30.90[84.66%] )
>LS-m0070_5p	|ppa000343m|PACid:17655980	|location[627,647]
5'UCAUUAUAAAGGAGCUGAGCG3'
|||||||||||||||||||||
3'GAUUCUAAUUUUACGAGAAAGUGAAACAGUAGUAAUAUUUCCUCGACUCGCUCCCAGCAGAACGGUUGGGGCGGGUAAGGG5' ( -35.90[100.00%] )
>LS-m0070_5p	|ppa000391m|PACid:17667187	|location[633,653]
5'UCAUUAUAAAGGAGCUGAGCG3'
|||||||||||||||||||||
3'GAUUCUAAUUUUACGAGAAAGUGAAAAAGUAGUAAUAUUUCCUCGACUCGCUCCCAACAGAACGGUUGGGGCGGGUAAGGG5' ( -35.90[100.00%] )
>LS-m0070_5p	|ppa019071m|PACid:17651510	|location[633,653]
5'UCAUUAUAAAGGAGCUGAGCG3'
|||||||||||||||||||||
3'GAUUCUAAUUUUACGAGAAAGUGAAAAAGUAGUAAUAUUUCCUCGACUCGCUCCCAACAGAACGGUUGGGGCGGGUAAGGG5' ( -35.90[100.00%] )
>LS-m0070_5p	|ppa023899m|PACid:17647794	|location[348,368]
5'UCAUUAUAAAGGAGCUGAGCG3'
|||||x||||||||x|||||o
3'AGUUAUAGUUUUGUGAGAAAGUGAAGCAGUAGUAACAUUUCCUCAACUCGUUCGCAACAGAAUGGUUGGGCGGGUAGGGUU5' ( -24.40[67.97%] )
>LS-m0070_5p	|ppa026310m|PACid:17662333	|location[618,638]
5'UCAUUAUAAAGGAGCUGAGCG3'
|||||||||||||||||||||
3'GAUUCUAAUUUUACGAGAAAGUGAAACAGUAGUAAUAUUUCCUCGACUCGCUCCCAACAGAACGGUUGGGGCGGGUAAGGG5' ( -35.90[100.00%] )
>LS-m0071_5p	|ppa000591m|PACid:17643219	|location[561,581]
5'UCAUUAUAAAGGAGCUGAGCG3'
||||o|xx||||||||||||x
3'UCCAUGGUGUCCUCGCUGGUACUUCGUCGGAGUAGUUCUUCCUCGACUCGGAAGACGGAGUAGUUGAACAGGAGAUGAUAU5' ( -30.90[84.66%] )
>LS-m0071_5p	|ppa000343m|PACid:17655980	|location[627,647]
5'UCAUUAUAAAGGAGCUGAGCG3'
|||||||||||||||||||||
3'GAUUCUAAUUUUACGAGAAAGUGAAACAGUAGUAAUAUUUCCUCGACUCGCUCCCAGCAGAACGGUUGGGGCGGGUAAGGG5' ( -35.90[100.00%] )
>LS-m0071_5p	|ppa000391m|PACid:17667187	|location[633,653]
5'UCAUUAUAAAGGAGCUGAGCG3'
|||||||||||||||||||||
3'GAUUCUAAUUUUACGAGAAAGUGAAAAAGUAGUAAUAUUUCCUCGACUCGCUCCCAACAGAACGGUUGGGGCGGGUAAGGG5' ( -35.90[100.00%] )
>LS-m0071_5p	|ppa019071m|PACid:17651510	|location[633,653]
5'UCAUUAUAAAGGAGCUGAGCG3'
|||||||||||||||||||||
3'GAUUCUAAUUUUACGAGAAAGUGAAAAAGUAGUAAUAUUUCCUCGACUCGCUCCCAACAGAACGGUUGGGGCGGGUAAGGG5' ( -35.90[100.00%] )
>LS-m0071_5p	|ppa023899m|PACid:17647794	|location[348,368]
5'UCAUUAUAAAGGAGCUGAGCG3'
|||||x||||||||x|||||o
3'AGUUAUAGUUUUGUGAGAAAGUGAAGCAGUAGUAACAUUUCCUCAACUCGUUCGCAACAGAAUGGUUGGGCGGGUAGGGUU5' ( -24.40[67.97%] )
>LS-m0071_5p	|ppa026310m|PACid:17662333	|location[618,638]
5'UCAUUAUAAAGGAGCUGAGCG3'
|||||||||||||||||||||
3'GAUUCUAAUUUUACGAGAAAGUGAAACAGUAGUAAUAUUUCCUCGACUCGCUCCCAACAGAACGGUUGGGGCGGGUAAGGG5' ( -35.90[100.00%] )
>LS-m0072_5p	|ppa000591m|PACid:17643219	|location[561,581]
5'UCAUUAUAAAGGAGCUGAGCG3'
||||o|xx||||||||||||x
3'UCCAUGGUGUCCUCGCUGGUACUUCGUCGGAGUAGUUCUUCCUCGACUCGGAAGACGGAGUAGUUGAACAGGAGAUGAUAU5' ( -30.90[84.66%] )
>LS-m0072_5p	|ppa000343m|PACid:17655980	|location[627,647]
5'UCAUUAUAAAGGAGCUGAGCG3'
|||||||||||||||||||||
3'GAUUCUAAUUUUACGAGAAAGUGAAACAGUAGUAAUAUUUCCUCGACUCGCUCCCAGCAGAACGGUUGGGGCGGGUAAGGG5' ( -35.90[100.00%] )
>LS-m0072_5p	|ppa000391m|PACid:17667187	|location[633,653]
5'UCAUUAUAAAGGAGCUGAGCG3'
|||||||||||||||||||||
3'GAUUCUAAUUUUACGAGAAAGUGAAAAAGUAGUAAUAUUUCCUCGACUCGCUCCCAACAGAACGGUUGGGGCGGGUAAGGG5' ( -35.90[100.00%] )
>LS-m0072_5p	|ppa019071m|PACid:17651510	|location[633,653]
5'UCAUUAUAAAGGAGCUGAGCG3'
|||||||||||||||||||||
3'GAUUCUAAUUUUACGAGAAAGUGAAAAAGUAGUAAUAUUUCCUCGACUCGCUCCCAACAGAACGGUUGGGGCGGGUAAGGG5' ( -35.90[100.00%] )
>LS-m0072_5p	|ppa023899m|PACid:17647794	|location[348,368]
5'UCAUUAUAAAGGAGCUGAGCG3'
|||||x||||||||x|||||o
3'AGUUAUAGUUUUGUGAGAAAGUGAAGCAGUAGUAACAUUUCCUCAACUCGUUCGCAACAGAAUGGUUGGGCGGGUAGGGUU5' ( -24.40[67.97%] )
>LS-m0072_5p	|ppa026310m|PACid:17662333	|location[618,638]
5'UCAUUAUAAAGGAGCUGAGCG3'
|||||||||||||||||||||
3'GAUUCUAAUUUUACGAGAAAGUGAAACAGUAGUAAUAUUUCCUCGACUCGCUCCCAACAGAACGGUUGGGGCGGGUAAGGG5' ( -35.90[100.00%] )
>LS-m0073_5p	|ppa004946m|PACid:17653371	|location[84,106]
5'UCUGUAGUGGAUUUGUGUUGGAC3'
|||x|x|||||||||||||||x|
3'UACGGUUAAAGGUUAGGUGUGUGUGAAGAAAGAAAACACCUAAACACAACCCGACUCCCGAGAGAGAGAGAAGACAUCCUACU5' ( -28.30[69.02%] )
>LS-m0074_5p	|ppb023941m|PACid:17664379	|location[83,105]
5'CGUAAAAGGAUAUUUAGACGACA3'
||||||||||||||||||||||x
3'AAAAACAACAAAGCAAAAUUUGUUUAGGCUGCAUUUUCCUAUAAAUCUGCUGCAAAACCAAAGUAUAUAUACAACACAAGAAU5' ( -35.20[100%] )
>LS-m0078_5p	|ppb015759m|PACid:17664298	|location[328,350]
5'UCUAGACCAAACUUGCAGGACGA3'
|xox||||||||||||||||||x
3'GCACGCUAGCACUCGUUAGGUUGGUAGGCAAAGCCUGGUUUGAACGUCCUGCACAUAGGAUCUGGAACACUUUGGAAAUCCUU5' ( -35.50[82.37%] )
>LS-m0079_5p	|ppa002506m|PACid:17662244	|location[1065,1085]
5'CAUGGUUGAUUGUUUUAGGGA3'
|||||o||x||x|||||o|||
3'AAAAAUGUGUGUGGGGUAGUAACCUCUUAUGUACCGACGAAGAAAAUUCCUAUCAACGUUAGCACAUGGGGUUCCGGUAAU5' ( -22.70[66.96%] )
>LS-m0079_5p	|ppa002882m|PACid:17662245	|location[945,965]
5'CAUGGUUGAUUGUUUUAGGGA3'
|||||o||x||x|||||o|||
3'AAAAAUGUGUGUGGGGUAGUAACCUCUUAUGUACCGACGAAGAAAAUUCCUAUCAACGUUAGCACAUGGGGUUCCGGUAAU5' ( -22.70[66.96%] )
>LS-m0079_5p	|ppa012167m|PACid:17649254	|location[1164,1184]
5'CAUGGUUGAUUGUUUUAGGGA3'
|||||||||||oo|||||||x
3'CAUCCAAAGGCCCUCGUUCGACGAAAAGCUGUACCAACUAAUGAAAUCCCACAUUUUGAAAGAAUGCGAGUUUUAAUCUCU5' ( -28.40[84.27%] )
>LS-m0080_5p	|ppa001691m|PACid:17659392	|location[172,194]
5'AGGUUUUCUUUGUUUUGGACUCA3'
x||||||x||||||x|||||||x
3'UGCCUCUGUGGCUUUAGAGCCCGACGCAGCCCCAAAACAAACAACACCUGAGAACGUUCGAACUAGAAGAAUUGAACAAAGAA5' ( -25.10[70.70%] )
>LS-m0080_5p	|ppa007812m|PACid:17662041	|location[306,328]
5'AGGUUUUCUUUGUUUUGGACUCA3'
|oo||||||||||||||o|x|||
3'GUCAUUGACACCAACCUUAGGGCGGUUGUUUUUAAAAGAAACAAAACUUUAGUAAAGGGACAGGUCUUGGGAAACCUUACCAA5' ( -21.50[60.56%] )
>LS-m0080_5p	|ppa000202m|PACid:17669145	|location[1116,1138]
5'AGGUUUUCUUUGUUUUGGACUCA3'
|o||||o||||||||x|||x|||
3'AUCUAGGUUUUGAUAAACCCGCUUAGCAGUUUCAAAGGAAACAAACCCUUAGUUUACGUCCCAACAGUUAUUCUCGUAACUGU5' ( -22.10[62.43%] )
>LS-m0083_5p	|ppa000467m|PACid:17661235	|location[863,885]
5'GUGGGAAGUGAAAAACAUGGCUA3'
||oo||||||||||x||||||x|
3'UGGUGGGAGUCUUGGACUGGUGUAUAGUGGCAUUCUUCACUUUUGGUACCGUUCUUGGCCUCGCGCCACCCGGACGGUACUUU5' ( -30.30[73.19%] )
>LS-m0083_5p	|ppa005027m|PACid:17666820	|location[1580,1602]
5'GUGGGAAGUGAAAAACAUGGCUA3'
||||x|||||||||x|||||x|x
3'CCUUUAUAAAUAGGAGUAAAGAUAUCACUUCACCGUUCACUUUUAGUACCAACGUCCCCGAAGUUUAACGUCUCGUAUACUAG5' ( -26.50[64.63%] )
>LS-m0083_5p	|ppa005528m|PACid:17666821	|location[1508,1530]
5'GUGGGAAGUGAAAAACAUGGCUA3'
||||x|||||||||x|||||x|x
3'CCUUUAUAAAUAGGAGUAAAGAUAUCACUUCACCGUUCACUUUUAGUACCAACGUCCCCGAAGUUUAACGUCUCGUAUACUAG5' ( -26.50[64.63%] )
>LS-m0083_5p	|ppa014014m|PACid:17668554	|location[1048,1070]
5'GUGGGAAGUGAAAAACAUGGCUA3'
||||||||||||x||x|||o|||
3'ACUCCCCUCCUUUUACAUAUCUUAAAACCACACCCUUCACUUCUUAUACUGAUUCAUAAAUAAAUUUUUUUAAGACUUUUACA5' ( -29.30[70.60%] )
>LS-m0084_3p	|ppa026316m|PACid:17666307	|location[667,689]
5'GACCAAUAUAUUUCGUCGCGCAA3'
|||||||x||||||||||x|||x
3'GUUAUAUAAAGCAGCGCGUUUGUAAACGCGCUGGUUACAUAAAGCAGCCCGUGUUUAAACGCCAUCUCAUCUAGCUAGUACCA5' ( -30.60[76.69%] )
>LS-m0086_3p	|ppa022271m|PACid:17661072	|location[1862,1884]
5'UAUCCGAGAUAGACUGUUUGGAA3'
|||||o||||||x||x|||||||
3'AAGACUGUUCAGGUUCAUUGGUUAUGCUAGAUAGGUUCUAUCCGAAAAACCUUAAAGGACGUUGUAAGGUUAGGAACCUCCAU5' ( -26.30[66.75%] )
>LS-m0086_3p	|ppa014636m|PACid:17666781	|location[2192,2214]
5'UAUCCGAGAUAGACUGUUUGGAA3'
|||||||||||||||||||||||
3'AAGACUGUUCAAGUUCAUUGGUUAUGCUAGAUAGGCUCUAUCUGACAAACCUUAAGACGGUAAUUAGACCAAAGAACUAUUUA5' ( -39.40[100.00%] )
>LS-m0086_3p	|ppa015797m|PACid:17651411	|location[2393,2415]
5'UAUCCGAGAUAGACUGUUUGGAA3'
||||x||||||||||||||||||
3'AAGACUGUUCAGGUUCAUUGGUUAUGCUAGAUAGACUCUAUCUGACAAACCUUAAGACGGUAAUUAGACCAAAGAACUAUUUA5' ( -33.30[84.52%] )
>LS-m0086_3p	|ppa016869m|PACid:17664015	|location[2273,2295]
5'UAUCCGAGAUAGACUGUUUGGAA3'
|||||||||||||||||||||||
3'AAGACUGUUCAGGUUCAUCGGUUAUGCUAGAUAGGCUCUAUCUGACAAACCUUAAGACGGUAAUUAGACCAAAGAACUAUUUA5' ( -39.40[100.00%] )
>LS-m0086_3p	|ppa018600m|PACid:17667693	|location[1583,1605]
5'UAUCCGAGAUAGACUGUUUGGAA3'
||||x||||||||||||||||||
3'AAGACUGUUCAGGUUCAUUGCUUAUGCUAGAUAGACUCUAUCUGACAAACCUUAAGACGGUAAUUAGACCAAAGAACUAUUUA5' ( -33.30[84.52%] )
>LS-m0086_3p	|ppa026113m|PACid:17648199	|location[2255,2277]
5'UAUCCGAGAUAGACUGUUUGGAA3'
||||x||||||||||||||||||
3'AAGACUGUUCAGGUUCAUUGGUUAUGCUAGAUAGACUCUAUCUGACAAACCUUAAGACGGUAAUUAGUUUGGUUGUUCUAGUC5' ( -33.30[84.52%] )
>LS-m0086_3p	|ppa026594m|PACid:17665820	|location[2279,2301]
5'UAUCCGAGAUAGACUGUUUGGAA3'
|||x||||||||||||||x||||
3'AAGAUUGUUCAGGUUCAUUGGUUAUGCUAGAUAAGCUCUAUCUGACAACCCUUAAGACGGCAAUUAUACCAAAGAACUAUUUA5' ( -28.50[72.34%] )
>LS-m0087_3p	|ppa022271m|PACid:17661072	|location[1862,1884]
5'UAUCCGAGAUAGACUGUUUGGAA3'
|||||o||||||x||x|||||||
3'AAGACUGUUCAGGUUCAUUGGUUAUGCUAGAUAGGUUCUAUCCGAAAAACCUUAAAGGACGUUGUAAGGUUAGGAACCUCCAU5' ( -26.30[66.75%] )
>LS-m0087_3p	|ppa014636m|PACid:17666781	|location[2192,2214]
5'UAUCCGAGAUAGACUGUUUGGAA3'
|||||||||||||||||||||||
3'AAGACUGUUCAAGUUCAUUGGUUAUGCUAGAUAGGCUCUAUCUGACAAACCUUAAGACGGUAAUUAGACCAAAGAACUAUUUA5' ( -39.40[100.00%] )
>LS-m0087_3p	|ppa015797m|PACid:17651411	|location[2393,2415]
5'UAUCCGAGAUAGACUGUUUGGAA3'
||||x||||||||||||||||||
3'AAGACUGUUCAGGUUCAUUGGUUAUGCUAGAUAGACUCUAUCUGACAAACCUUAAGACGGUAAUUAGACCAAAGAACUAUUUA5' ( -33.30[84.52%] )
>LS-m0087_3p	|ppa016869m|PACid:17664015	|location[2273,2295]
5'UAUCCGAGAUAGACUGUUUGGAA3'
|||||||||||||||||||||||
3'AAGACUGUUCAGGUUCAUCGGUUAUGCUAGAUAGGCUCUAUCUGACAAACCUUAAGACGGUAAUUAGACCAAAGAACUAUUUA5' ( -39.40[100.00%] )
>LS-m0087_3p	|ppa018600m|PACid:17667693	|location[1583,1605]
5'UAUCCGAGAUAGACUGUUUGGAA3'
||||x||||||||||||||||||
3'AAGACUGUUCAGGUUCAUUGCUUAUGCUAGAUAGACUCUAUCUGACAAACCUUAAGACGGUAAUUAGACCAAAGAACUAUUUA5' ( -33.30[84.52%] )
>LS-m0087_3p	|ppa026113m|PACid:17648199	|location[2255,2277]
5'UAUCCGAGAUAGACUGUUUGGAA3'
||||x||||||||||||||||||
3'AAGACUGUUCAGGUUCAUUGGUUAUGCUAGAUAGACUCUAUCUGACAAACCUUAAGACGGUAAUUAGUUUGGUUGUUCUAGUC5' ( -33.30[84.52%] )
>LS-m0087_3p	|ppa026594m|PACid:17665820	|location[2279,2301]
5'UAUCCGAGAUAGACUGUUUGGAA3'
|||x||||||||||||||x||||
3'AAGAUUGUUCAGGUUCAUUGGUUAUGCUAGAUAAGCUCUAUCUGACAACCCUUAAGACGGCAAUUAUACCAAAGAACUAUUUA5' ( -28.50[72.34%] )
>LS-m0088_3p	|ppa016087m|PACid:17645514	|location[1482,1504]
5'ACAAAAGGGAGUAUAAGUGGACA3'
|x|x|||||||||||xx||||||
3'AGUUGACACGGAGUCCUGAAUUUUAUAGUAUUUCUUCCCUCAUAUCGACCUGUCGUCCGCGGUUUCGUCCGCGUCGGCAAGGU5' ( -25.60[65.47%] )
>LS-m0090_5p	|ppa003136m|PACid:17643333	|location[1335,1355]
5'UGCCUGGCUCCCUGUAUGCCA3'
||||||||||||||o||||||
3'ACCCUAUCUAAUCUAUGUGUCAUAUCUAGAACGGACCGAGGGACGUACGGUCGUCCUUUUCACAAUAUCAAGUUGUUCCUA5' ( -46.30[100.00%] )
>LS-m0090_5p	|ppa002082m|PACid:17645207	|location[1344,1364]
5'UGCCUGGCUCCCUGUAUGCCA3'
||||||||||||||||||||x
3'UCUAGACUAUUUCUAUAAGAUUUAACUCGUACGGACCGAGGGACAUACGGACGUCCUCACAACAGUCCAUCUGUUGUGUUC5' ( -46.30[100%] )
>LS-m0090_5p	|ppa002195m|PACid:17653376	|location[1580,1600]
5'UGCCUGGCUCCCUGUAUGCCA3'
||||||||||||||o||||||
3'UAUAGACUAUUCCUAUCUGGUAUUACUGGUACGGACCGAGGGACGUACGGUCGUCCUCAAAACAGCCCGUCUGUUGGUUUU5' ( -46.10[100.00%] )
>LS-m0090_5p	|ppa002691m|PACid:17640912	|location[2583,2603]
5'UGCCUGGCUCCCUGUAUGCCA3'
||||||x|||||||ox|||x|
3'UAAAUCCACGUUUUGUUAUAGGUCAUUUGGACGGACGGAGGGACGGACGAUCAACCCGUGUUCAGCCCGUUUUGACCAGAG5' ( -33.90[73.22%] )
>LS-m0090_5p	|ppa002710m|PACid:17657536	|location[1272,1292]
5'UGCCUGGCUCCCUGUAUGCCA3'
||||||||||||||||||||x
3'UGUAGGCUACUUCUAUCAAGUUUAACUCGAACGGACCGAGGGACAUACGGGCGACUAUAAAACAGACUAUGUGAUGUAUUC5' ( -46.30[100.00%] )
>LS-m0091_3p	|ppa000868m|PACid:17657531	|location[108,130]
5'UGUUGAAGAGACUGUUGGAGAUA3'
||xx||||||||||||||||x|x
3'CCUUUACUCACCUCCUUCUCACACUCCCGAACUUCUUCUCUGACAACCUCCAACUCGACUUCUCUUUGAACACCAAUUCGAAG5' ( -30.80[77.78%] )
>LS-m0091_3p	|ppa005096m|PACid:17647450	|location[491,513]
5'UGUUGAAGAGACUGUUGGAGAUA3'
||oo|||||||x|||x|||||||
3'CGAGAGAGGUGCACCGCUACCUCCGCGGCUACGGCUUCUCUUACACCCUCUAUAAUCAAGCAAGUAUAGGCCCAAGCCCAGGC5' ( -28.70[72.47%] )
>LS-m0092_5p	|ppa012426m|PACid:17657501	|location[715,735]
5'UAAAAGAAAAGGAUGUGCUAA3'
||||||x||||||||||x||x
3'UCGGGUGUUAUAUUAGUGUCUUUGAUAUAUAUUUUCCUUUCCUACACAAUCUAGGAAAAACGUGUAGGUGAACUAGAUUAU5' ( -19.00[63.55%] )
>LS-m0092_5p	|ppa008959m|PACid:17652151	|location[1168,1188]
5'UAAAAGAAAAGGAUGUGCUAA3'
|||x|x|||||||||||||||
3'GUACGUUGUGAAUUAUAUACCGUUGUGUUUAUUGUAUUUUCCUACACGAUUAAUGUCAUGUUCUAGACUAAGGAGUUCUGU5' ( -22.50[75.00%] )
>LS-m0093_5p	|ppa008065m|PACid:17662475	|location[1058,1078]
5'UAGCCAAGGAUGACUUGCCUG3'
||||||||||||xx||||x||
3'AGUAGGAGAGGAACGCGAAGAGUUUCUUAGAUCGGUUCCUACGAAACGCACGAACUCCGUGACCAUGACGACCUUAGUCCA5' ( -27.30[66.42%] )
>LS-m0093_5p	|ppa011476m|PACid:17641245	|location[661,681]
5'UAGCCAAGGAUGACUUGCCUG3'
|||||||||||||xx||xx||
3'GAGUGAAUCAGUUGAGUCGACUCUCACACAAUCGGUUCCUACUAUACCAACUUCCUCUGUGGGGAGAUCAGGGUGGGUUUA5' ( -28.02[68.34%] )
>LS-m0093_5p	|ppa012173m|PACid:17666161	|location[698,718]
5'UAGCCAAGGAUGACUUGCCUG3'
x|||||||o||||x|||||||
3'GUGUUGUGGGUUAUUAAUGUUUUCAUUGGUUUCGGUUCUUACUAAACGGACUAUAUCUGUAACGUGUCGUCCCAAAGUGGG5' ( -30.30[74.26%] )
>LS-m0094_3p	|ppa009397m|PACid:17656533	|location[1000,1020]
5'UGCCAAAGAAGAGUUGCCCUA3'
ox|||||||||||||||xx||
3'UUUUAGAGGUAUUGUUCGUUCACGUAGGUAGAGGUUUCUUCUCAACGUAAUGGAGAGUCAUAAGAGACAAGUUUGUUCCUU5' ( -27.40[69.90%] )
>LS-m0094_3p	|ppa015730m|PACid:17660744	|location[338,358]
5'UGCCAAAGAAGAGUUGCCCUA3'
x||||||||||x||||x||||
3'UUAGCUUUCUGACUCUUCCUUUGAACAAUUCCGGUUUCUUCACAACCGGAUACUUCGGUAACCUCCCCCACGGUUUCCGGU5' ( -25.70[65.73%] )
>LS-m0094_3p	|ppa003154m|PACid:17650304	|location[866,886]
5'UGCCAAAGAAGAGUUGCCCUA3'
|x||||||||||||o|||||x
3'AUUCGUCGUCGACUAAACUCGUCGAAGUCGAAGGUUUCUUCUCAGCGGGAGCCAUAUUAUAGUCGGUUUCUGCUCUCCGUA5' ( -34.00[86.96%] )
>LS-m0094_3p	|ppa004613m|PACid:17651940	|location[338,358]
5'UGCCAAAGAAGAGUUGCCCUA3'
x||||||||||x||||x||||
3'UUAGCUUUCUGACUCUUCCUUUGAACAAUUCCGGUUUCUUCACAACCGGAUACUUCGGUAACCUCCCCCACGGUUUCCGGU5' ( -25.70[65.73%] )
>LS-m0094_3p	|ppa024435m|PACid:17650881	|location[248,268]
5'UGCCAAAGAAGAGUUGCCCUA3'
xo||||||||||x|||||||x
3'GAAAGAAAGAAGGGUUAAACAGUGGUUCGGUUGGUUUCUUCUGAACGGGACGGUUACACGGUGUUUCACGGUGUGGUAACU5' ( -31.30[79.85%] )
>LS-m0094_3p	|ppa025234m|PACid:17662545	|location[248,268]
5'UGCCAAAGAAGAGUUGCCCUA3'
x|||||||||||||||||||x
3'GAAAAAAGGAUGGUUCAAAUAGAGGUUCGGUCGGUUUCUUCUCAACGGGACGAUCCCAAGGUUUGUUUCGUUGGGGUCAAU5' ( -37.50[95.66%] )
>LS-m0096_3p	|ppa009397m|PACid:17656533	|location[1000,1020]
5'UGCCAAAGAAGAGUUGCCCUA3'
ox|||||||||||||||xx||
3'UUUUAGAGGUAUUGUUCGUUCACGUAGGUAGAGGUUUCUUCUCAACGUAAUGGAGAGUCAUAAGAGACAAGUUUGUUCCUU5' ( -27.40[69.90%] )
>LS-m0096_3p	|ppa015730m|PACid:17660744	|location[338,358]
5'UGCCAAAGAAGAGUUGCCCUA3'
x||||||||||x||||x||||
3'UUAGCUUUCUGACUCUUCCUUUGAACAAUUCCGGUUUCUUCACAACCGGAUACUUCGGUAACCUCCCCCACGGUUUCCGGU5' ( -25.70[65.73%] )
>LS-m0096_3p	|ppa003154m|PACid:17650304	|location[866,886]
5'UGCCAAAGAAGAGUUGCCCUA3'
|x||||||||||||o|||||x
3'AUUCGUCGUCGACUAAACUCGUCGAAGUCGAAGGUUUCUUCUCAGCGGGAGCCAUAUUAUAGUCGGUUUCUGCUCUCCGUA5' ( -34.00[86.96%] )
>LS-m0096_3p	|ppa004613m|PACid:17651940	|location[338,358]
5'UGCCAAAGAAGAGUUGCCCUA3'
x||||||||||x||||x||||
3'UUAGCUUUCUGACUCUUCCUUUGAACAAUUCCGGUUUCUUCACAACCGGAUACUUCGGUAACCUCCCCCACGGUUUCCGGU5' ( -25.70[65.73%] )
>LS-m0096_3p	|ppa024435m|PACid:17650881	|location[248,268]
5'UGCCAAAGAAGAGUUGCCCUA3'
xo||||||||||x|||||||x
3'GAAAGAAAGAAGGGUUAAACAGUGGUUCGGUUGGUUUCUUCUGAACGGGACGGUUACACGGUGUUUCACGGUGUGGUAACU5' ( -31.30[79.85%] )
>LS-m0096_3p	|ppa025234m|PACid:17662545	|location[248,268]
5'UGCCAAAGAAGAGUUGCCCUA3'
x|||||||||||||||||||x
3'GAAAAAAGGAUGGUUCAAAUAGAGGUUCGGUCGGUUUCUUCUCAACGGGACGAUCCCAAGGUUUGUUUCGUUGGGGUCAAU5' ( -37.50[95.66%] )
>LS-m0097_3p	|ppa000884m|PACid:17650408	|location[2577,2597]
5'UAGGGCUCCUCUUUCUUGGCA3'
||xo||||||||||xx|||||
3'UACUAGAGGGGUUUCGACAUAUGUAGGGACAUAUCGAGGAGAAAACACCGUGAUAACCAUAGUGGACAUAGGGAAAACCUU5' ( -26.80[64.58%] )
>LS-m0097_3p	|ppa004780m|PACid:17645927	|location[1033,1053]
5'UAGGGCUCCUCUUUCUUGGCA3'
|x||x||||||||||||ox||
3'CAAACGAGACGUCAGAGGCGUCGGAAGACGAACCAGAGGAGAAAGAAUGGUCUGUUCAUCAGGUACCGAAAAGCUCGUCGC5' ( -26.00[62.35%] )
>LS-m0097_3p	|ppa005234m|PACid:17651481	|location[80,100]
5'UAGGGCUCCUCUUUCUUGGCA3'
|x||||||||||o|||||x|x
3'UUACUUGGACCUCCCUCCAAUCGGGAAAAGACCCCGAGGAGAGAGAACAGGGAAAAGCACUUUUAAUUUUUACUCUCUUCC5' ( -32.50[77.75%] )
>LS-m0097_3p	|ppa008203m|PACid:17667763	|location[587,607]
5'UAGGGCUCCUCUUUCUUGGCA3'
|x|||||||||oo|x||||||
3'GAAAAAGACGAAAUUCUUCCUGUAGUCAGGACCCCGAGGAGGGAUAACCGUGACGACCCCACAGGAGUAGUGUACCUGGUA5' ( -32.20[77.03%] )
>LS-m0097_3p	|ppa008279m|PACid:17667764	|location[578,598]
5'UAGGGCUCCUCUUUCUUGGCA3'
|x|||||||||oo|x||||||
3'GAAAAAGACGAAAUUCUUCCUGUAGUCAGGACCCCGAGGAGGGAUAACCGUGACGACCCCACAGGAGUAGUGUACCUGGUA5' ( -32.20[77.03%] )
>LS-m0097_3p	|ppa000011m|PACid:17653665	|location[7779,7799]
5'UAGGGCUCCUCUUUCUUGGCA3'
|x|o|||||||||o|||||x|
3'CAACAUUAAGGCACGAGCACAAGUAUUCAAAACUCGAGGAGAAGGAACCCUUCGUUUGAUACUCUACCAUAGACUUCAACG5' ( -32.00[76.56%] )
>LS-m0097_3p	|ppa004529m|PACid:17668351	|location[1418,1438]
5'UAGGGCUCCUCUUUCUUGGCA3'
||x|x||||||o|x|||||||
3'GCAGAUGUAUACCACCUCAUUUGAGAGGUAAUACGGAGGAGGAUGAACCGUAAGGGGUUCCUAAUUUAGGUGGUCUUUUCG5' ( -27.30[65.16%] )
>LS-m0097_3p	|ppa014894m|PACid:17648368	|location[60,80]
5'UAGGGCUCCUCUUUCUUGGCA3'
|x||||||||||||||oxx||
3'AACCUUUGUUACCACCGUUUGUAUCUUUCAAACCCGAGGAGAAAGAGAGGUUAUACAAAUCCUUCUCGUUCGAGUUGUAGA5' ( -30.90[73.92%] )
>LS-m0097_3p	|ppa000438m|PACid:17649984	|location[91,111]
5'UAGGGCUCCUCUUUCUUGGCA3'
o||||||x||||||||x|||x
3'UCCCAAAAGUUCACGCCAGAACUUUCUUUAGUCCCGAAGAGAAAGACCCGAGACGAGUAAAACUAUUUGUUACCGUAACCA5' ( -30.70[73.44%] )
>LS-m0097_3p	|ppa003822m|PACid:17647745	|location[981,1001]
5'UAGGGCUCCUCUUUCUUGGCA3'
||oo||||||||||x|||x||
3'UUUGAACUAAACAUAUACAAGGUAUGGGCUAUUUCGAGGAGAAACAACGGUUGUAAUGGUAUCUCUGAAUUUUCUAUUACU5' ( -25.30[60.82%] )
>LS-m0098_3p	|ppa009397m|PACid:17656533	|location[1000,1020]
5'UGCCAAAGAAGAGUUGCCCUA3'
ox|||||||||||||||xx||
3'UUUUAGAGGUAUUGUUCGUUCACGUAGGUAGAGGUUUCUUCUCAACGUAAUGGAGAGUCAUAAGAGACAAGUUUGUUCCUU5' ( -27.40[69.90%] )
>LS-m0098_3p	|ppa015730m|PACid:17660744	|location[338,358]
5'UGCCAAAGAAGAGUUGCCCUA3'
x||||||||||x||||x||||
3'UUAGCUUUCUGACUCUUCCUUUGAACAAUUCCGGUUUCUUCACAACCGGAUACUUCGGUAACCUCCCCCACGGUUUCCGGU5' ( -25.70[65.73%] )
>LS-m0098_3p	|ppa003154m|PACid:17650304	|location[866,886]
5'UGCCAAAGAAGAGUUGCCCUA3'
|x||||||||||||o|||||x
3'AUUCGUCGUCGACUAAACUCGUCGAAGUCGAAGGUUUCUUCUCAGCGGGAGCCAUAUUAUAGUCGGUUUCUGCUCUCCGUA5' ( -34.00[86.96%] )
>LS-m0098_3p	|ppa004613m|PACid:17651940	|location[338,358]
5'UGCCAAAGAAGAGUUGCCCUA3'
x||||||||||x||||x||||
3'UUAGCUUUCUGACUCUUCCUUUGAACAAUUCCGGUUUCUUCACAACCGGAUACUUCGGUAACCUCCCCCACGGUUUCCGGU5' ( -25.70[65.73%] )
>LS-m0098_3p	|ppa024435m|PACid:17650881	|location[248,268]
5'UGCCAAAGAAGAGUUGCCCUA3'
xo||||||||||x|||||||x
3'GAAAGAAAGAAGGGUUAAACAGUGGUUCGGUUGGUUUCUUCUGAACGGGACGGUUACACGGUGUUUCACGGUGUGGUAACU5' ( -31.30[79.85%] )
>LS-m0098_3p	|ppa025234m|PACid:17662545	|location[248,268]
5'UGCCAAAGAAGAGUUGCCCUA3'
x|||||||||||||||||||x
3'GAAAAAAGGAUGGUUCAAAUAGAGGUUCGGUCGGUUUCUUCUCAACGGGACGAUCCCAAGGUUUGUUUCGUUGGGGUCAAU5' ( -37.50[95.66%] )
>LS-m0099_3p	|ppa009397m|PACid:17656533	|location[1000,1020]
5'UGCCAAAGAAGAGUUGCCCUA3'
ox|||||||||||||||xx||
3'UUUUAGAGGUAUUGUUCGUUCACGUAGGUAGAGGUUUCUUCUCAACGUAAUGGAGAGUCAUAAGAGACAAGUUUGUUCCUU5' ( -27.40[69.90%] )
>LS-m0099_3p	|ppa015730m|PACid:17660744	|location[338,358]
5'UGCCAAAGAAGAGUUGCCCUA3'
x||||||||||x||||x||||
3'UUAGCUUUCUGACUCUUCCUUUGAACAAUUCCGGUUUCUUCACAACCGGAUACUUCGGUAACCUCCCCCACGGUUUCCGGU5' ( -25.70[65.73%] )
>LS-m0099_3p	|ppa003154m|PACid:17650304	|location[866,886]
5'UGCCAAAGAAGAGUUGCCCUA3'
|x||||||||||||o|||||x
3'AUUCGUCGUCGACUAAACUCGUCGAAGUCGAAGGUUUCUUCUCAGCGGGAGCCAUAUUAUAGUCGGUUUCUGCUCUCCGUA5' ( -34.00[86.96%] )
>LS-m0099_3p	|ppa004613m|PACid:17651940	|location[338,358]
5'UGCCAAAGAAGAGUUGCCCUA3'
x||||||||||x||||x||||
3'UUAGCUUUCUGACUCUUCCUUUGAACAAUUCCGGUUUCUUCACAACCGGAUACUUCGGUAACCUCCCCCACGGUUUCCGGU5' ( -25.70[65.73%] )
>LS-m0099_3p	|ppa024435m|PACid:17650881	|location[248,268]
5'UGCCAAAGAAGAGUUGCCCUA3'
xo||||||||||x|||||||x
3'GAAAGAAAGAAGGGUUAAACAGUGGUUCGGUUGGUUUCUUCUGAACGGGACGGUUACACGGUGUUUCACGGUGUGGUAACU5' ( -31.30[79.85%] )
>LS-m0099_3p	|ppa025234m|PACid:17662545	|location[248,268]
5'UGCCAAAGAAGAGUUGCCCUA3'
x|||||||||||||||||||x
3'GAAAAAAGGAUGGUUCAAAUAGAGGUUCGGUCGGUUUCUUCUCAACGGGACGAUCCCAAGGUUUGUUUCGUUGGGGUCAAU5' ( -37.50[95.66%] )
>LS-m0100_3p	|ppa000247m|PACid:17669219	|location[3820,3842]
5'AGUUUGUAGCAAUUUUCGGUGUA3'
|o|||||x||||||||||o||||
3'AACUCUAACGUGUACAGGCCAUUGUAGAGGUUAAACAACGUUAAAAGCUACAUCUAAAGAAAGUCCGACCUCCGGCGACAACA5' ( -26.20[73.60%] )
>LS-m0100_3p	|ppa000274m|PACid:17648933	|location[3585,3607]
5'AGUUUGUAGCAAUUUUCGGUGUA3'
|o|||||x||||||||||o|||x
3'AACUCUAACUCGUACAGGCCAUUGUACAGGUUAAACAACGUUAAAAGCUACAACUAAACAGAGUCCGACCUCCGCCGACAACA5' ( -25.80[72.47%] )
>LS-m0101_3p	|ppa000247m|PACid:17669219	|location[3820,3842]
5'AGUUUGUAGCAAUUUUCGGUGUA3'
|o|||||x||||||||||o||||
3'AACUCUAACGUGUACAGGCCAUUGUAGAGGUUAAACAACGUUAAAAGCUACAUCUAAAGAAAGUCCGACCUCCGGCGACAACA5' ( -26.20[73.60%] )
>LS-m0101_3p	|ppa000274m|PACid:17648933	|location[3585,3607]
5'AGUUUGUAGCAAUUUUCGGUGUA3'
|o|||||x||||||||||o|||x
3'AACUCUAACUCGUACAGGCCAUUGUACAGGUUAAACAACGUUAAAAGCUACAACUAAACAGAGUCCGACCUCCGCCGACAACA5' ( -25.80[72.47%] )
>LS-m0102_3p	|ppa000247m|PACid:17669219	|location[3820,3842]
5'AGUUUGUAGCAAUUUUCGGUGUA3'
|o|||||x||||||||||o||||
3'AACUCUAACGUGUACAGGCCAUUGUAGAGGUUAAACAACGUUAAAAGCUACAUCUAAAGAAAGUCCGACCUCCGGCGACAACA5' ( -26.20[73.60%] )
>LS-m0102_3p	|ppa000274m|PACid:17648933	|location[3585,3607]
5'AGUUUGUAGCAAUUUUCGGUGUA3'
|o|||||x||||||||||o|||x
3'AACUCUAACUCGUACAGGCCAUUGUACAGGUUAAACAACGUUAAAAGCUACAACUAAACAGAGUCCGACCUCCGCCGACAACA5' ( -25.80[72.47%] )
>LS-m0103_5p	|ppa005915m|PACid:17643346	|location[87,109]
5'CUGAGUAUUGGGGUGGAAUGGUA3'
||||o|||||||x|ox|||||||
3'ACCUUAACUUCCAACCGAAACUCAACCUCAGACUUAUAACCCAAUGUUACCAUAUAAAACUCAAAACCAAAACCACAAAACCA5' ( -28.60[65.15%] )
>LS-m0104_5p	|ppa009570m|PACid:17662533	|location[393,412]
5'GGAAUGGGCUGUUUGGGAUG3'
|||x||||x||o||||||x|
3'UUAACCCAAAUCCCAAAGUACUUAACCCCACCUAACCCAACGAACCCUUCGAACCUAAUAACAACAACUACUACUCCUCC5' ( -26.70[66.58%] )
>LS-m0104_5p	|ppa011036m|PACid:17657406	|location[183,202]
5'GGAAUGGGCUGUUUGGGAUG3'
|||||||||||||xo|x|x|
3'CCCACCUCUCCACCACCUACUCCGCCACCUCCUUACCCGACAACUCGUUCUUCAACAGAACACUCAACACGACUACCAGU5' ( -27.40[69.37%] )
>LS-m0106_3p	|ppa012437m|PACid:17648072	|location[161,180]
5'AAAGACUAAAAUACCCUUGA3'
|||||||||||xxx|||||x
3'ACGCCUCUAACUUCUCCUCCACCUCCACCUUUUCUGAUUUUCCAGGAACAAUGACGCCAACCCUCGUAGCAGAUCCUCGU5' ( -17.40[60.84%] )
>LS-m0106_3p	|ppa013211m|PACid:17655878	|location[447,466]
5'AAAGACUAAAAUACCCUUGA3'
|x|||||x|||||||||oo|
3'UGAAAUUUUUGAUCGGUUUUUGAGUCAAUUUAUCUGAGUUUAUGGGAGUUAUAAAUUUGAGUGUAUUUUGGAUUCUUCCU5' ( -21.30[74.48%] )
>LS-m0106_3p	|ppa017834m|PACid:17641445	|location[71,90]
5'AAAGACUAAAAUACCCUUGA3'
||||||||||||||||||o|
3'GAAGUGGUGGGAGUGUUUGGAUCUUUUAUCUUUCUGAUUUUAUGGGAAUUUUAUAUACCUUUUAACUUACCACAAUUUCA5' ( -26.30[92.28%] )
>LS-m0108_5p	|ppa008953m|PACid:17642768	|location[644,665]
5'UGAUAUUGGCACGGCUCAAUCA3'
|||o|||o||||x|||||||x|
3'GUCUUAGUCGUGAAGAGAACCAGGGUCGACACUGUAAUCGUGACGAGUUACUUCUUCUUCUACUCCUGCUGCUUCUUCGACU5' ( -27.10[68.09%] )
>LS-m0108_5p	|ppa008961m|PACid:17642769	|location[644,665]
5'UGAUAUUGGCACGGCUCAAUCA3'
|||o|||o||||x|||||||x|
3'GUCUUAGUCGUGAAGAGAACCAGGGUCGACACUGUAAUCGUGACGAGUUACUUCUUCUUCUACUCCUGCUGCUUCUUCGACU5' ( -27.10[68.09%] )
>LS-m0109_5p	|ppa008065m|PACid:17662475	|location[1058,1078]
5'UAGCCAAGGAUGACUUGCCUG3'
||||||||||||xx||||x||
3'AGUAGGAGAGGAACGCGAAGAGUUUCUUAGAUCGGUUCCUACGAAACGCACGAACUCCGUGACCAUGACGACCUUAGUCCA5' ( -27.30[66.42%] )
>LS-m0109_5p	|ppa011476m|PACid:17641245	|location[661,681]
5'UAGCCAAGGAUGACUUGCCUG3'
|||||||||||||xx||xx||
3'GAGUGAAUCAGUUGAGUCGACUCUCACACAAUCGGUUCCUACUAUACCAACUUCCUCUGUGGGGAGAUCAGGGUGGGUUUA5' ( -28.02[68.34%] )
>LS-m0109_5p	|ppa012173m|PACid:17666161	|location[698,718]
5'UAGCCAAGGAUGACUUGCCUG3'
x|||||||o||||x|||||||
3'GUGUUGUGGGUUAUUAAUGUUUUCAUUGGUUUCGGUUCUUACUAAACGGACUAUAUCUGUAACGUGUCGUCCCAAAGUGGG5' ( -30.30[74.26%] )
>LS-m0110_5p	|ppa008065m|PACid:17662475	|location[1058,1078]
5'UAGCCAAGGAUGACUUGCCUG3'
||||||||||||xx||||x||
3'AGUAGGAGAGGAACGCGAAGAGUUUCUUAGAUCGGUUCCUACGAAACGCACGAACUCCGUGACCAUGACGACCUUAGUCCA5' ( -27.30[66.42%] )
>LS-m0110_5p	|ppa011476m|PACid:17641245	|location[661,681]
5'UAGCCAAGGAUGACUUGCCUG3'
|||||||||||||xx||xx||
3'GAGUGAAUCAGUUGAGUCGACUCUCACACAAUCGGUUCCUACUAUACCAACUUCCUCUGUGGGGAGAUCAGGGUGGGUUUA5' ( -28.02[68.34%] )
>LS-m0110_5p	|ppa012173m|PACid:17666161	|location[698,718]
5'UAGCCAAGGAUGACUUGCCUG3'
x|||||||o||||x|||||||
3'GUGUUGUGGGUUAUUAAUGUUUUCAUUGGUUUCGGUUCUUACUAAACGGACUAUAUCUGUAACGUGUCGUCCCAAAGUGGG5' ( -30.30[74.26%] )
>LS-m0111_3p	|ppa009397m|PACid:17656533	|location[1000,1020]
5'UGCCAAAGAAGAGUUGCCCUA3'
ox|||||||||||||||xx||
3'UUUUAGAGGUAUUGUUCGUUCACGUAGGUAGAGGUUUCUUCUCAACGUAAUGGAGAGUCAUAAGAGACAAGUUUGUUCCUU5' ( -27.40[69.90%] )
>LS-m0111_3p	|ppa015730m|PACid:17660744	|location[338,358]
5'UGCCAAAGAAGAGUUGCCCUA3'
x||||||||||x||||x||||
3'UUAGCUUUCUGACUCUUCCUUUGAACAAUUCCGGUUUCUUCACAACCGGAUACUUCGGUAACCUCCCCCACGGUUUCCGGU5' ( -25.70[65.73%] )
>LS-m0111_3p	|ppa003154m|PACid:17650304	|location[866,886]
5'UGCCAAAGAAGAGUUGCCCUA3'
|x||||||||||||o|||||x
3'AUUCGUCGUCGACUAAACUCGUCGAAGUCGAAGGUUUCUUCUCAGCGGGAGCCAUAUUAUAGUCGGUUUCUGCUCUCCGUA5' ( -34.00[86.96%] )
>LS-m0111_3p	|ppa004613m|PACid:17651940	|location[338,358]
5'UGCCAAAGAAGAGUUGCCCUA3'
x||||||||||x||||x||||
3'UUAGCUUUCUGACUCUUCCUUUGAACAAUUCCGGUUUCUUCACAACCGGAUACUUCGGUAACCUCCCCCACGGUUUCCGGU5' ( -25.70[65.73%] )
>LS-m0111_3p	|ppa024435m|PACid:17650881	|location[248,268]
5'UGCCAAAGAAGAGUUGCCCUA3'
xo||||||||||x|||||||x
3'GAAAGAAAGAAGGGUUAAACAGUGGUUCGGUUGGUUUCUUCUGAACGGGACGGUUACACGGUGUUUCACGGUGUGGUAACU5' ( -31.30[79.85%] )
>LS-m0111_3p	|ppa025234m|PACid:17662545	|location[248,268]
5'UGCCAAAGAAGAGUUGCCCUA3'
x|||||||||||||||||||x
3'GAAAAAAGGAUGGUUCAAAUAGAGGUUCGGUCGGUUUCUUCUCAACGGGACGAUCCCAAGGUUUGUUUCGUUGGGGUCAAU5' ( -37.50[95.66%] )
>LS-m0112_3p	|ppa009397m|PACid:17656533	|location[1000,1020]
5'UGCCAAAGAAGAGUUGCCCUA3'
ox|||||||||||||||xx||
3'UUUUAGAGGUAUUGUUCGUUCACGUAGGUAGAGGUUUCUUCUCAACGUAAUGGAGAGUCAUAAGAGACAAGUUUGUUCCUU5' ( -27.40[69.90%] )
>LS-m0112_3p	|ppa015730m|PACid:17660744	|location[338,358]
5'UGCCAAAGAAGAGUUGCCCUA3'
x||||||||||x||||x||||
3'UUAGCUUUCUGACUCUUCCUUUGAACAAUUCCGGUUUCUUCACAACCGGAUACUUCGGUAACCUCCCCCACGGUUUCCGGU5' ( -25.70[65.73%] )
>LS-m0112_3p	|ppa003154m|PACid:17650304	|location[866,886]
5'UGCCAAAGAAGAGUUGCCCUA3'
|x||||||||||||o|||||x
3'AUUCGUCGUCGACUAAACUCGUCGAAGUCGAAGGUUUCUUCUCAGCGGGAGCCAUAUUAUAGUCGGUUUCUGCUCUCCGUA5' ( -34.00[86.96%] )
>LS-m0112_3p	|ppa004613m|PACid:17651940	|location[338,358]
5'UGCCAAAGAAGAGUUGCCCUA3'
x||||||||||x||||x||||
3'UUAGCUUUCUGACUCUUCCUUUGAACAAUUCCGGUUUCUUCACAACCGGAUACUUCGGUAACCUCCCCCACGGUUUCCGGU5' ( -25.70[65.73%] )
>LS-m0112_3p	|ppa024435m|PACid:17650881	|location[248,268]
5'UGCCAAAGAAGAGUUGCCCUA3'
xo||||||||||x|||||||x
3'GAAAGAAAGAAGGGUUAAACAGUGGUUCGGUUGGUUUCUUCUGAACGGGACGGUUACACGGUGUUUCACGGUGUGGUAACU5' ( -31.30[79.85%] )
>LS-m0112_3p	|ppa025234m|PACid:17662545	|location[248,268]
5'UGCCAAAGAAGAGUUGCCCUA3'
x|||||||||||||||||||x
3'GAAAAAAGGAUGGUUCAAAUAGAGGUUCGGUCGGUUUCUUCUCAACGGGACGAUCCCAAGGUUUGUUUCGUUGGGGUCAAU5' ( -37.50[95.66%] )
>LS-m0113_3p	|ppa009397m|PACid:17656533	|location[1000,1020]
5'UGCCAAAGAAGAGUUGCCCUA3'
ox|||||||||||||||xx||
3'UUUUAGAGGUAUUGUUCGUUCACGUAGGUAGAGGUUUCUUCUCAACGUAAUGGAGAGUCAUAAGAGACAAGUUUGUUCCUU5' ( -27.40[69.90%] )
>LS-m0113_3p	|ppa015730m|PACid:17660744	|location[338,358]
5'UGCCAAAGAAGAGUUGCCCUA3'
x||||||||||x||||x||||
3'UUAGCUUUCUGACUCUUCCUUUGAACAAUUCCGGUUUCUUCACAACCGGAUACUUCGGUAACCUCCCCCACGGUUUCCGGU5' ( -25.70[65.73%] )
>LS-m0113_3p	|ppa003154m|PACid:17650304	|location[866,886]
5'UGCCAAAGAAGAGUUGCCCUA3'
|x||||||||||||o|||||x
3'AUUCGUCGUCGACUAAACUCGUCGAAGUCGAAGGUUUCUUCUCAGCGGGAGCCAUAUUAUAGUCGGUUUCUGCUCUCCGUA5' ( -34.00[86.96%] )
>LS-m0113_3p	|ppa004613m|PACid:17651940	|location[338,358]
5'UGCCAAAGAAGAGUUGCCCUA3'
x||||||||||x||||x||||
3'UUAGCUUUCUGACUCUUCCUUUGAACAAUUCCGGUUUCUUCACAACCGGAUACUUCGGUAACCUCCCCCACGGUUUCCGGU5' ( -25.70[65.73%] )
>LS-m0113_3p	|ppa024435m|PACid:17650881	|location[248,268]
5'UGCCAAAGAAGAGUUGCCCUA3'
xo||||||||||x|||||||x
3'GAAAGAAAGAAGGGUUAAACAGUGGUUCGGUUGGUUUCUUCUGAACGGGACGGUUACACGGUGUUUCACGGUGUGGUAACU5' ( -31.30[79.85%] )
>LS-m0113_3p	|ppa025234m|PACid:17662545	|location[248,268]
5'UGCCAAAGAAGAGUUGCCCUA3'
x|||||||||||||||||||x
3'GAAAAAAGGAUGGUUCAAAUAGAGGUUCGGUCGGUUUCUUCUCAACGGGACGAUCCCAAGGUUUGUUUCGUUGGGGUCAAU5' ( -37.50[95.66%] )
>LS-m0114_3p	|ppa009397m|PACid:17656533	|location[1000,1020]
5'UGCCAAAGAAGAGUUGCCCUA3'
ox|||||||||||||||xx||
3'UUUUAGAGGUAUUGUUCGUUCACGUAGGUAGAGGUUUCUUCUCAACGUAAUGGAGAGUCAUAAGAGACAAGUUUGUUCCUU5' ( -27.40[69.90%] )
>LS-m0114_3p	|ppa015730m|PACid:17660744	|location[338,358]
5'UGCCAAAGAAGAGUUGCCCUA3'
x||||||||||x||||x||||
3'UUAGCUUUCUGACUCUUCCUUUGAACAAUUCCGGUUUCUUCACAACCGGAUACUUCGGUAACCUCCCCCACGGUUUCCGGU5' ( -25.70[65.73%] )
>LS-m0114_3p	|ppa003154m|PACid:17650304	|location[866,886]
5'UGCCAAAGAAGAGUUGCCCUA3'
|x||||||||||||o|||||x
3'AUUCGUCGUCGACUAAACUCGUCGAAGUCGAAGGUUUCUUCUCAGCGGGAGCCAUAUUAUAGUCGGUUUCUGCUCUCCGUA5' ( -34.00[86.96%] )
>LS-m0114_3p	|ppa004613m|PACid:17651940	|location[338,358]
5'UGCCAAAGAAGAGUUGCCCUA3'
x||||||||||x||||x||||
3'UUAGCUUUCUGACUCUUCCUUUGAACAAUUCCGGUUUCUUCACAACCGGAUACUUCGGUAACCUCCCCCACGGUUUCCGGU5' ( -25.70[65.73%] )
>LS-m0114_3p	|ppa024435m|PACid:17650881	|location[248,268]
5'UGCCAAAGAAGAGUUGCCCUA3'
xo||||||||||x|||||||x
3'GAAAGAAAGAAGGGUUAAACAGUGGUUCGGUUGGUUUCUUCUGAACGGGACGGUUACACGGUGUUUCACGGUGUGGUAACU5' ( -31.30[79.85%] )
>LS-m0114_3p	|ppa025234m|PACid:17662545	|location[248,268]
5'UGCCAAAGAAGAGUUGCCCUA3'
x|||||||||||||||||||x
3'GAAAAAAGGAUGGUUCAAAUAGAGGUUCGGUCGGUUUCUUCUCAACGGGACGAUCCCAAGGUUUGUUUCGUUGGGGUCAAU5' ( -37.50[95.66%] )
>LS-m0115_5p	|ppa000884m|PACid:17650408	|location[2577,2597]
5'UAGGGCUCCUCUUUCUUGGCA3'
||xo||||||||||xx|||||
3'UACUAGAGGGGUUUCGACAUAUGUAGGGACAUAUCGAGGAGAAAACACCGUGAUAACCAUAGUGGACAUAGGGAAAACCUU5' ( -26.80[64.58%] )
>LS-m0115_5p	|ppa004780m|PACid:17645927	|location[1033,1053]
5'UAGGGCUCCUCUUUCUUGGCA3'
|x||x||||||||||||ox||
3'CAAACGAGACGUCAGAGGCGUCGGAAGACGAACCAGAGGAGAAAGAAUGGUCUGUUCAUCAGGUACCGAAAAGCUCGUCGC5' ( -26.00[62.35%] )
>LS-m0115_5p	|ppa005234m|PACid:17651481	|location[80,100]
5'UAGGGCUCCUCUUUCUUGGCA3'
|x||||||||||o|||||x|x
3'UUACUUGGACCUCCCUCCAAUCGGGAAAAGACCCCGAGGAGAGAGAACAGGGAAAAGCACUUUUAAUUUUUACUCUCUUCC5' ( -32.50[77.75%] )
>LS-m0115_5p	|ppa008203m|PACid:17667763	|location[587,607]
5'UAGGGCUCCUCUUUCUUGGCA3'
|x|||||||||oo|x||||||
3'GAAAAAGACGAAAUUCUUCCUGUAGUCAGGACCCCGAGGAGGGAUAACCGUGACGACCCCACAGGAGUAGUGUACCUGGUA5' ( -32.20[77.03%] )
>LS-m0115_5p	|ppa008279m|PACid:17667764	|location[578,598]
5'UAGGGCUCCUCUUUCUUGGCA3'
|x|||||||||oo|x||||||
3'GAAAAAGACGAAAUUCUUCCUGUAGUCAGGACCCCGAGGAGGGAUAACCGUGACGACCCCACAGGAGUAGUGUACCUGGUA5' ( -32.20[77.03%] )
>LS-m0115_5p	|ppa000011m|PACid:17653665	|location[7779,7799]
5'UAGGGCUCCUCUUUCUUGGCA3'
|x|o|||||||||o|||||x|
3'CAACAUUAAGGCACGAGCACAAGUAUUCAAAACUCGAGGAGAAGGAACCCUUCGUUUGAUACUCUACCAUAGACUUCAACG5' ( -32.00[76.56%] )
>LS-m0115_5p	|ppa004529m|PACid:17668351	|location[1418,1438]
5'UAGGGCUCCUCUUUCUUGGCA3'
||x|x||||||o|x|||||||
3'GCAGAUGUAUACCACCUCAUUUGAGAGGUAAUACGGAGGAGGAUGAACCGUAAGGGGUUCCUAAUUUAGGUGGUCUUUUCG5' ( -27.30[65.16%] )
>LS-m0115_5p	|ppa014894m|PACid:17648368	|location[60,80]
5'UAGGGCUCCUCUUUCUUGGCA3'
|x||||||||||||||oxx||
3'AACCUUUGUUACCACCGUUUGUAUCUUUCAAACCCGAGGAGAAAGAGAGGUUAUACAAAUCCUUCUCGUUCGAGUUGUAGA5' ( -30.90[73.92%] )
>LS-m0115_5p	|ppa000438m|PACid:17649984	|location[91,111]
5'UAGGGCUCCUCUUUCUUGGCA3'
o||||||x||||||||x|||x
3'UCCCAAAAGUUCACGCCAGAACUUUCUUUAGUCCCGAAGAGAAAGACCCGAGACGAGUAAAACUAUUUGUUACCGUAACCA5' ( -30.70[73.44%] )
>LS-m0115_5p	|ppa003822m|PACid:17647745	|location[981,1001]
5'UAGGGCUCCUCUUUCUUGGCA3'
||oo||||||||||x|||x||
3'UUUGAACUAAACAUAUACAAGGUAUGGGCUAUUUCGAGGAGAAACAACGGUUGUAAUGGUAUCUCUGAAUUUUCUAUUACU5' ( -25.30[60.82%] )
>LS-m0116_5p	|ppa000884m|PACid:17650408	|location[2577,2597]
5'UAGGGCUCCUCUUUCUUGGCA3'
||xo||||||||||xx|||||
3'UACUAGAGGGGUUUCGACAUAUGUAGGGACAUAUCGAGGAGAAAACACCGUGAUAACCAUAGUGGACAUAGGGAAAACCUU5' ( -26.80[64.58%] )
>LS-m0116_5p	|ppa004780m|PACid:17645927	|location[1033,1053]
5'UAGGGCUCCUCUUUCUUGGCA3'
|x||x||||||||||||ox||
3'CAAACGAGACGUCAGAGGCGUCGGAAGACGAACCAGAGGAGAAAGAAUGGUCUGUUCAUCAGGUACCGAAAAGCUCGUCGC5' ( -26.00[62.35%] )
>LS-m0116_5p	|ppa005234m|PACid:17651481	|location[80,100]
5'UAGGGCUCCUCUUUCUUGGCA3'
|x||||||||||o|||||x|x
3'UUACUUGGACCUCCCUCCAAUCGGGAAAAGACCCCGAGGAGAGAGAACAGGGAAAAGCACUUUUAAUUUUUACUCUCUUCC5' ( -32.50[77.75%] )
>LS-m0116_5p	|ppa008203m|PACid:17667763	|location[587,607]
5'UAGGGCUCCUCUUUCUUGGCA3'
|x|||||||||oo|x||||||
3'GAAAAAGACGAAAUUCUUCCUGUAGUCAGGACCCCGAGGAGGGAUAACCGUGACGACCCCACAGGAGUAGUGUACCUGGUA5' ( -32.20[77.03%] )
>LS-m0116_5p	|ppa008279m|PACid:17667764	|location[578,598]
5'UAGGGCUCCUCUUUCUUGGCA3'
|x|||||||||oo|x||||||
3'GAAAAAGACGAAAUUCUUCCUGUAGUCAGGACCCCGAGGAGGGAUAACCGUGACGACCCCACAGGAGUAGUGUACCUGGUA5' ( -32.20[77.03%] )
>LS-m0116_5p	|ppa000011m|PACid:17653665	|location[7779,7799]
5'UAGGGCUCCUCUUUCUUGGCA3'
|x|o|||||||||o|||||x|
3'CAACAUUAAGGCACGAGCACAAGUAUUCAAAACUCGAGGAGAAGGAACCCUUCGUUUGAUACUCUACCAUAGACUUCAACG5' ( -32.00[76.56%] )
>LS-m0116_5p	|ppa004529m|PACid:17668351	|location[1418,1438]
5'UAGGGCUCCUCUUUCUUGGCA3'
||x|x||||||o|x|||||||
3'GCAGAUGUAUACCACCUCAUUUGAGAGGUAAUACGGAGGAGGAUGAACCGUAAGGGGUUCCUAAUUUAGGUGGUCUUUUCG5' ( -27.30[65.16%] )
>LS-m0116_5p	|ppa014894m|PACid:17648368	|location[60,80]
5'UAGGGCUCCUCUUUCUUGGCA3'
|x||||||||||||||oxx||
3'AACCUUUGUUACCACCGUUUGUAUCUUUCAAACCCGAGGAGAAAGAGAGGUUAUACAAAUCCUUCUCGUUCGAGUUGUAGA5' ( -30.90[73.92%] )
>LS-m0116_5p	|ppa000438m|PACid:17649984	|location[91,111]
5'UAGGGCUCCUCUUUCUUGGCA3'
o||||||x||||||||x|||x
3'UCCCAAAAGUUCACGCCAGAACUUUCUUUAGUCCCGAAGAGAAAGACCCGAGACGAGUAAAACUAUUUGUUACCGUAACCA5' ( -30.70[73.44%] )
>LS-m0116_5p	|ppa003822m|PACid:17647745	|location[981,1001]
5'UAGGGCUCCUCUUUCUUGGCA3'
||oo||||||||||x|||x||
3'UUUGAACUAAACAUAUACAAGGUAUGGGCUAUUUCGAGGAGAAACAACGGUUGUAAUGGUAUCUCUGAAUUUUCUAUUACU5' ( -25.30[60.82%] )
>LS-m0117_5p	|ppa022635m|PACid:17649018	|location[223,243]
5'AUGGCAGAUGAGGUGGACAGC3'
|||||||||||o||||x|xx|
3'CGGCAGGCGGUGAGGCUACCAGACCCGCAGUACCGUCUACUUCACCCGCAGAAGCGGGUCCCCAAAAAGGAACAAGAGAAA5' ( -30.10[69.04%] )
>LS-m0117_5p	|ppa013442m|PACid:17662880	|location[91,111]
5'AUGGCAGAUGAGGUGGACAGC3'
||o|x||||||||x|o|||||
3'GAGACUGACUCAACCUUAUCGAUUCUGGAGUAUCCUCUACUCCUCUUGUCGUUUCUGUUCUGGUUCUUCUUCUUUUCGGAA5' ( -27.60[63.59%] )
>LS-m0117_5p	|ppa005803m|PACid:17655267	|location[1053,1073]
5'AUGGCAGAUGAGGUGGACAGC3'
|||||||xx||||||||x|x|
3'AACAGAGGACACGUUAGAACCCUUACAGACUACCGUCCCCUCCACCUUUGGCGAGUGUUCGGGGUACACAUAGCUCUAGUU5' ( -27.30[63.34%] )
>LS-m0117_5p	|ppa017079m|PACid:17664635	|location[43,63]
5'AUGGCAGAUGAGGUGGACAGC3'
||o|x||||||||x|o|||||
3'GAGACUGACUCAACCUUAUCGAUUCUGGAGUAUCCUCUACUCCUCUUGUCGUUUCUGUUCUGGUUCUUCUUCUUUUCGGAA5' ( -27.60[63.59%] )
>LS-m0117_5p	|ppa002291m|PACid:17659234	|location[441,461]
5'AUGGCAGAUGAGGUGGACAGC3'
|||||x|||||||o|||x|o|
3'ACCCCACCUAGUACUAGUAGUCCCUAAACCUACCGACUACUCCGCCUCUUGAACCGUGACGGUUCUUCGAAAUGUAGUAGA5' ( -28.90[67.21%] )
>LS-m0117_5p	|ppa021476m|PACid:17640334	|location[105,125]
5'AUGGCAGAUGAGGUGGACAGC3'
|||||||x||||||||xx|x|
3'GACUUAUACGAGGGCUACCUCUCCAGAAAUUACCGUCGACUCCACCGCUGGACCGCGAGCUAAACCCAGUAGACCGGCUGG5' ( -27.60[64.19%] )
>LS-m0117_5p	|ppa026252m|PACid:17641872	|location[105,125]
5'AUGGCAGAUGAGGUGGACAGC3'
|||||||x||||||||xx|x|
3'GACUUAUACGAGGGCUACCUCUCCAGAAAUUACCGUCGACUCCACCGCUGGACCGCGAGCUAAACCCAGUAGACCGGCUGG5' ( -27.60[64.19%] )
>LS-m0118_3p	|ppa001407m|PACid:17643515	|location[775,795]
5'GAGAUUAGAAGUAUGUAACCA3'
||||xo|||||o|||||x|||
3'UCGAUUAAAGUCUCAUACUAUCCGAAGUCACUCUUGUCUUCGUACAUAGGUGUGGGUUUCGACCGCUUUCCAUCUUCUCAA5' ( -25.50[75.67%] )
>LS-m0118_3p	|ppa017778m|PACid:17663650	|location[3545,3565]
5'GAGAUUAGAAGUAUGUAACCA3'
|||||xxo|||||||o|||||
3'UCAGGUGCGGGGUAUGUUUCGGAGGUGUAUCUCUACGUUUCAUACGUUGGUGCAUAGGGAAAUCGGUACGUUGAGGCAAAC5' ( -25.10[75.60%] )
>LS-m0119_3p	|ppa009397m|PACid:17656533	|location[1000,1020]
5'UGCCAAAGAAGAGUUGCCCUA3'
ox|||||||||||||||xx||
3'UUUUAGAGGUAUUGUUCGUUCACGUAGGUAGAGGUUUCUUCUCAACGUAAUGGAGAGUCAUAAGAGACAAGUUUGUUCCUU5' ( -27.40[69.90%] )
>LS-m0119_3p	|ppa015730m|PACid:17660744	|location[338,358]
5'UGCCAAAGAAGAGUUGCCCUA3'
x||||||||||x||||x||||
3'UUAGCUUUCUGACUCUUCCUUUGAACAAUUCCGGUUUCUUCACAACCGGAUACUUCGGUAACCUCCCCCACGGUUUCCGGU5' ( -25.70[65.73%] )
>LS-m0119_3p	|ppa003154m|PACid:17650304	|location[866,886]
5'UGCCAAAGAAGAGUUGCCCUA3'
|x||||||||||||o|||||x
3'AUUCGUCGUCGACUAAACUCGUCGAAGUCGAAGGUUUCUUCUCAGCGGGAGCCAUAUUAUAGUCGGUUUCUGCUCUCCGUA5' ( -34.00[86.96%] )
>LS-m0119_3p	|ppa004613m|PACid:17651940	|location[338,358]
5'UGCCAAAGAAGAGUUGCCCUA3'
x||||||||||x||||x||||
3'UUAGCUUUCUGACUCUUCCUUUGAACAAUUCCGGUUUCUUCACAACCGGAUACUUCGGUAACCUCCCCCACGGUUUCCGGU5' ( -25.70[65.73%] )
>LS-m0119_3p	|ppa024435m|PACid:17650881	|location[248,268]
5'UGCCAAAGAAGAGUUGCCCUA3'
xo||||||||||x|||||||x
3'GAAAGAAAGAAGGGUUAAACAGUGGUUCGGUUGGUUUCUUCUGAACGGGACGGUUACACGGUGUUUCACGGUGUGGUAACU5' ( -31.30[79.85%] )
>LS-m0119_3p	|ppa025234m|PACid:17662545	|location[248,268]
5'UGCCAAAGAAGAGUUGCCCUA3'
x|||||||||||||||||||x
3'GAAAAAAGGAUGGUUCAAAUAGAGGUUCGGUCGGUUUCUUCUCAACGGGACGAUCCCAAGGUUUGUUUCGUUGGGGUCAAU5' ( -37.50[95.66%] )
>LS-m0124_3p	|ppa014500m|PACid:17642168	|location[42,62]
5'UCUUAGUUGGCAUCAGGGGAG3'
||||||o|o||x|||o|||||
3'CUGUGUAUAUCGGGAUCCCAAAGUGAUACGAGAAUCGAUCGGAGUUCCCUCAUUCUUAGAAGUUAUAAAUUUAGACUUUGC5' ( -32.30[77.64%] )
>LS-m0125_5p	|ppa008953m|PACid:17642768	|location[644,665]
5'UGAUAUUGGCACGGCUCAAUCA3'
|||o|||o||||x|||||||x|
3'GUCUUAGUCGUGAAGAGAACCAGGGUCGACACUGUAAUCGUGACGAGUUACUUCUUCUUCUACUCCUGCUGCUUCUUCGACU5' ( -27.10[68.09%] )
>LS-m0125_5p	|ppa008961m|PACid:17642769	|location[644,665]
5'UGAUAUUGGCACGGCUCAAUCA3'
|||o|||o||||x|||||||x|
3'GUCUUAGUCGUGAAGAGAACCAGGGUCGACACUGUAAUCGUGACGAGUUACUUCUUCUUCUACUCCUGCUGCUUCUUCGACU5' ( -27.10[68.09%] )
>LS-m0126_3p	|ppa012437m|PACid:17648072	|location[161,180]
5'AAAGACUAAAAUACCCUUGA3'
|||||||||||xxx|||||x
3'ACGCCUCUAACUUCUCCUCCACCUCCACCUUUUCUGAUUUUCCAGGAACAAUGACGCCAACCCUCGUAGCAGAUCCUCGU5' ( -17.40[60.84%] )
>LS-m0126_3p	|ppa013211m|PACid:17655878	|location[447,466]
5'AAAGACUAAAAUACCCUUGA3'
|x|||||x|||||||||oo|
3'UGAAAUUUUUGAUCGGUUUUUGAGUCAAUUUAUCUGAGUUUAUGGGAGUUAUAAAUUUGAGUGUAUUUUGGAUUCUUCCU5' ( -21.30[74.48%] )
>LS-m0126_3p	|ppa017834m|PACid:17641445	|location[71,90]
5'AAAGACUAAAAUACCCUUGA3'
||||||||||||||||||o|
3'GAAGUGGUGGGAGUGUUUGGAUCUUUUAUCUUUCUGAUUUUAUGGGAAUUUUAUAUACCUUUUAACUUACCACAAUUUCA5' ( -26.30[92.28%] )
>LS-m0127_3p	|ppa012437m|PACid:17648072	|location[161,180]
5'AAAGACUAAAAUACCCUUGA3'
|||||||||||xxx|||||x
3'ACGCCUCUAACUUCUCCUCCACCUCCACCUUUUCUGAUUUUCCAGGAACAAUGACGCCAACCCUCGUAGCAGAUCCUCGU5' ( -17.40[60.84%] )
>LS-m0127_3p	|ppa013211m|PACid:17655878	|location[447,466]
5'AAAGACUAAAAUACCCUUGA3'
|x|||||x|||||||||oo|
3'UGAAAUUUUUGAUCGGUUUUUGAGUCAAUUUAUCUGAGUUUAUGGGAGUUAUAAAUUUGAGUGUAUUUUGGAUUCUUCCU5' ( -21.30[74.48%] )
>LS-m0127_3p	|ppa017834m|PACid:17641445	|location[71,90]
5'AAAGACUAAAAUACCCUUGA3'
||||||||||||||||||o|
3'GAAGUGGUGGGAGUGUUUGGAUCUUUUAUCUUUCUGAUUUUAUGGGAAUUUUAUAUACCUUUUAACUUACCACAAUUUCA5' ( -26.30[92.28%] )
>LS-m0128_3p	|ppa008731m|PACid:17646504	|location[95,117]
5'AGUGAGAGUGAGAGAAAGAGGCA3'
||||||||x||||||x||||ox|
3'AUCUUUCUCUUUCACCCAAAACAAACAGAAUCACUCUCUCUCUCUCUCUCUCUCAUCCCAUCCCAACUAGACCAAAUAUUCUA5' ( -29.70[67.50%] )
>LS-m0128_3p	|ppa010066m|PACid:17641455	|location[18,40]
5'AGUGAGAGUGAGAGAAAGAGGCA3'
||x||||||||||||x||||ox|
3'GGUAUCAACGGUACAGAAUAUAGAAGCCUCUCUCUCUCACUCUCUCUCUCUCUCCCACCUAUGAAUACUU5' ( -29.10[67.05%] )
>LS-m0128_3p	|ppa000858m|PACid:17648618	|location[186,208]
5'AGUGAGAGUGAGAGAAAGAGGCA3'
||x|||||x|||||||||||ox|
3'UCGGAAAACUCUAAACAUUAAGUGUCUCUCUCUCUCUCUCUCUCUUUCUCUUUUUCUCUGUCGACUCAAAGUCUGUCUUUCUU5' ( -28.70[65.98%] )
>LS-m0128_3p	|ppa000857m|PACid:17648619	|location[186,208]
5'AGUGAGAGUGAGAGAAAGAGGCA3'
||x|||||x|||||||||||ox|
3'UCGGAAAACUCUAAACAUUAAGUGUCUCUCUCUCUCUCUCUCUCUUUCUCUUUUUCUCUGUCGACUCAAAGUCUGUCUUUCUU5' ( -28.70[65.98%] )
>LS-m0128_3p	|ppa000893m|PACid:17648620	|location[186,208]
5'AGUGAGAGUGAGAGAAAGAGGCA3'
||x|||||x|||||||||||ox|
3'UCGGAAAACUCUAAACAUUAAGUGUCUCUCUCUCUCUCUCUCUCUUUCUCUUUUUCUCUGUCGACUCAAAGUCUGUCUUUCUU5' ( -28.70[65.98%] )
>LS-m0128_3p	|ppa006940m|PACid:17662175	|location[26,48]
5'AGUGAGAGUGAGAGAAAGAGGCA3'
||x|||||x||||||x||||o||
3'CACACAAAGUUUCAGAGAUGCUGUUUUGUCUCUCUCUCUCUCUCUGUCUCUGUCUCUCUGUCUCUGUCUCUCGCUCUU5' ( -29.20[67.28%] )
>LS-m0128_3p	|ppa006953m|PACid:17642034	|location[117,139]
5'AGUGAGAGUGAGAGAAAGAGGCA3'
||x|||||x||||||x||||o||
3'UCUCGGUGGUCGUGGCACUGCUCGCACCCCUCUCUCUCUCUCUCUCUCUCUGUCUUUCUGUCUGUCUGUCUGUCCCUGUCUAU5' ( -29.20[67.28%] )
>LS-m0128_3p	|ppa007418m|PACid:17661537	|location[59,81]
5'AGUGAGAGUGAGAGAAAGAGGCA3'
||x|||||x||||||x||||||x
3'CGCUGUACGGGGUACCGUGCGUUUAUGAUCUCUCUCUCUCUCUCUCUCUCCGAAUACCCAAUAUAAUAUAUCUCUUCUUUGCU5' ( -32.10[73.62%] )
>LS-m0128_3p	|ppa008842m|PACid:17661100	|location[112,134]
5'AGUGAGAGUGAGAGAAAGAGGCA3'
||x|||||x|||||||||||ox|
3'GAGACCUGAGAGUCAAAAGAACACCCUUUCUCUCUCUCUCUCUCUUUCUCUCUCUUCCACACCACACAACACAACACAACACA5' ( -28.60[65.90%] )
>LS-m0128_3p	|ppa009437m|PACid:17667723	|location[2,24]
5'AGUGAGAGUGAGAGAAAGAGGCA3'
||x|||||x||||||x|||||x|
3'AUUUACGUCCCGUGUCUCUCUCUCUCUCUCUCUCUCUCUCUCUCUCUCUCCAUC5' ( -27.70[63.82%] )
>LS-m0128_3p	|ppa013411m|PACid:17642089	|location[76,98]
5'AGUGAGAGUGAGAGAAAGAGGCA3'
||x|||||x||||||x|||||x|
3'UCUCUCUCUCUUCGUGUCUGUCUUCGCUCUUCUCUCUCUCUCUCUCUCUCCUUCAAGGGAAGGCAGGAGAGAGGGGGUGAGAG5' ( -27.30[62.90%] )
>LS-m0128_3p	|ppa019624m|PACid:17642235	|location[65,87]
5'AGUGAGAGUGAGAGAAAGAGGCA3'
||||||||x||||||x||||o|x
3'UAUCCCAAAGCAAAGCACUCACUCACUCACUCACUCUCUCUCUCUCUCUCUGCCGGCUCACUCACACUCUCUCUCAGAAAAAA5' ( -33.50[77.19%] )
>LS-m0128_3p	|ppa001932m|PACid:17641355	|location[262,284]
5'AGUGAGAGUGAGAGAAAGAGGCA3'
|||o||||x||||||||||oo||
3'CUUAGGGAGUUUUUGAGUUAGCUCUAGCUUUCAUUCUCUCUCUCUUUCUUUGUGUCUCUCUCUCUCUCUCCAAAUUCGUCGAA5' ( -32.10[73.79%] )
>LS-m0128_3p	|ppa006411m|PACid:17647082	|location[141,163]
5'AGUGAGAGUGAGAGAAAGAGGCA3'
||||||||x||||||x||||ox|
3'AGACUCUAGCUCUCCGGCUCUGACACUCUCUCACUCUCUCUCUCUCUCUCUCUCUCUCUCUCUCUCUCUCUCUCUCUCUCUCA5' ( -29.30[67.51%] )
>LS-m0128_3p	|ppa006416m|PACid:17668898	|location[123,145]
5'AGUGAGAGUGAGAGAAAGAGGCA3'
||x|||||x||||||x||||x||
3'ACCCUAAUCAAAGGUAAAGAUCUCUCUCGCUCUCUCUCUCUCUCUCUCUCAGUCUCUUCUUUCUGUCUCUAUAAUACUCAUCU5' ( -29.30[67.51%] )
>LS-m0128_3p	|ppa006878m|PACid:17662519	|location[130,152]
5'AGUGAGAGUGAGAGAAAGAGGCA3'
||x|||||x||||||||||||xx
3'CUUUGCUCUCUCUCUCUCUCUCUCUCUCUCUCUCUCUCUCUCUCUUUCUCCUCCAUACACAUGCACACCCUUUAAAAAAGUAG5' ( -30.80[70.97%] )
>LS-m0128_3p	|ppa007231m|PACid:17649394	|location[39,61]
5'AGUGAGAGUGAGAGAAAGAGGCA3'
||||||||x||||||x||||ox|
3'GAUGAAACAAAGUGUGUGUCUCUCUCUCUCUCACUCUCUCUCUCUCUCUCUCUCUCUACCUUAAUUUUUAGAUCGCCUCUUUU5' ( -29.10[67.05%] )
>LS-m0128_3p	|ppa010350m|PACid:17651495	|location[3,25]
5'AGUGAGAGUGAGAGAAAGAGGCA3'
||x|||||x||||||x|||||x|
3'ACUUCCCCUUACUCUCUCUCUCUCUCUCUCUCUCUCUCUCUCUCUCUCUCCCUUA5' ( -27.50[63.22%] )
>LS-m0128_3p	|ppa010487m|PACid:17659807	|location[15,37]
5'AGUGAGAGUGAGAGAAAGAGGCA3'
||x|||||x||||||x|||||x|
3'GGUACAAAAUGAUGACGUUAGUUGCCUCUCUCUCUCUCUCUCUCUCUCUCCUUCUUCUUCUCUCUUU5' ( -27.30[62.90%] )
>LS-m0128_3p	|ppa011421m|PACid:17657506	|location[81,103]
5'AGUGAGAGUGAGAGAAAGAGGCA3'
||x|||||x||||||||||||xx
3'UUUCAAAUACCGAAAAACUAAGCCGCCCUCUCUCUCUCUCUCUCUUUCUCCCCGAGUAGUGUACUAAGAGUGAGUAAGUGAGA5' ( -31.00[71.26%] )
>LS-m0128_3p	|ppa012146m|PACid:17667873	|location[112,134]
5'AGUGAGAGUGAGAGAAAGAGGCA3'
||x|||||x||||||x|||||x|
3'ACUGUUUUUGAGUCUCUCUCUCUCUCUCUCUCUCUCUCUCUCUCUCUCUCCCUCUCCCUCUUUCUCUCCCUCUUCGCACCCGA5' ( -27.50[63.36%] )
>LS-m0128_3p	|ppa012694m|PACid:17667874	|location[112,134]
5'AGUGAGAGUGAGAGAAAGAGGCA3'
||x|||||x||||||x|||||x|
3'ACUGUUUUUGAGUCUCUCUCUCUCUCUCUCUCUCUCUCUCUCUCUCUCUCCCUCUCCCUCUUUCUCUCCCUCUUCGCACCCGA5' ( -27.50[63.36%] )
>LS-m0128_3p	|ppa012391m|PACid:17645771	|location[125,147]
5'AGUGAGAGUGAGAGAAAGAGGCA3'
||x|||||x||||||x||||o||
3'GAUUCUCUGAAUUUAUACACUGAUUCUCUCUCUCUCUCUCUCUCUCUCUCUGUCUCUCUCUGUCUCUCUCGCGCGCUAUCUCU5' ( -29.20[67.28%] )
>LS-m0128_3p	|ppa017103m|PACid:17668176	|location[19,41]
5'AGUGAGAGUGAGAGAAAGAGGCA3'
||x|||||x||||||x||||o||
3'CUAUACCUCUGAGAUCUCUCUCUCUCUCUGUCUCUCUCUCUCUCUCUCUCUGUCUCUCGGCAGGGCUAGUA5' ( -29.80[67.73%] )
>LS-m0128_3p	|ppa001512m|PACid:17651789	|location[36,58]
5'AGUGAGAGUGAGAGAAAGAGGCA3'
||x|||||x||||||x|||||x|
3'GAAAUCUCUAUCUUUGACUCUCUCUCUCUCUCUCUCUCUCUCUCUCUCUCCCUCUCUCUCACUGACACCUCGACUCGUCUUUA5' ( -27.50[63.36%] )
>LS-m0128_3p	|ppa002209m|PACid:17663827	|location[43,65]
5'AGUGAGAGUGAGAGAAAGAGGCA3'
||x|||||x||||||x||||o||
3'GGUGUCUCUCCCACUCUCUCUCUCUCUCUCUCUCUCUCUCUCUCUCUCUCUGUUUCUUUCCAAUACUGACACACACCCCGAAC5' ( -29.30[67.36%] )
>LS-m0128_3p	|ppa002613m|PACid:17663187	|location[94,116]
5'AGUGAGAGUGAGAGAAAGAGGCA3'
||||||||x||||||x||||ox|
3'GUACCACCACCACCACUCUCUUCACCUCACUCACUCUCUCUCUCUCUCUCUCUCUCAUACACCCAAAAACCACCCUCCACCAA5' ( -29.10[67.05%] )
>LS-m0128_3p	|ppa004118m|PACid:17651895	|location[6,28]
5'AGUGAGAGUGAGAGAAAGAGGCA3'
||x|||||x||||||x|||||x|
3'ACUCAUAAGGUGUCUCUCUCUCUCUCUCUCUCUCUCUCUCUCUCUCUCUCCUUGACUC5' ( -27.30[62.76%] )
>LS-m0128_3p	|ppa004673m|PACid:17644253	|location[67,89]
5'AGUGAGAGUGAGAGAAAGAGGCA3'
||x|||||x|||||||||||ox|
3'UCUGGCUGCAUCUCUCUCUCUCUCUCUCUCUCUCUCUCUCUCUCUUUCUCUCUGUCUCUCUCUCCCUUCUCUUUAAACAAUAU5' ( -28.60[65.75%] )
>LS-m0128_3p	|ppa004670m|PACid:17644254	|location[67,89]
5'AGUGAGAGUGAGAGAAAGAGGCA3'
||x|||||x|||||||||||ox|
3'UCUGGCUGCAUCUCUCUCUCUCUCUCUCUCUCUCUCUCUCUCUCUUUCUCUCUGUCUCUCUCUCCCUUCUCUUUAAACAAUAU5' ( -28.60[65.75%] )
>LS-m0128_3p	|ppa005153m|PACid:17663226	|location[1586,1608]
5'AGUGAGAGUGAGAGAAAGAGGCA3'
||x|||||x||||||x|||||x|
3'UACCUAGUGGACAAUCAACCCUCUUUUCUCUCUCUCUCUCUCUCUCUCUCCCUCUCUCUUUCCCUAAUUGUUCCUUCUGUUUA5' ( -27.50[63.36%] )
>LS-m0128_3p	|ppa006474m|PACid:17641886	|location[7,29]
5'AGUGAGAGUGAGAGAAAGAGGCA3'
||x|||||x||||||x|||o|||
3'GGAGUGGUUAAGUCUCUCUCUCUCUCUCUCUCUCUCUCUCUCUCUCUCUUCGUUUGAAG5' ( -29.30[67.36%] )
>LS-m0128_3p	|ppa006787m|PACid:17660488	|location[2,24]
5'AGUGAGAGUGAGAGAAAGAGGCA3'
||||||||x||||||x||||ox|
3'CAGGGCUUAAGGUUAUAGACCGCAUAUAAAUCACUCUCUCUCUCUCUCUCUCUC5' ( -29.70[67.50%] )
>LS-m0128_3p	|ppa008184m|PACid:17644445	|location[5,27]
5'AGUGAGAGUGAGAGAAAGAGGCA3'
||x|||||x||||||x|||||x|
3'AAAAACCUUCUCUCUCUCUCUCUCUCUCUCUCUCUCUCUCUCUCUCUCUCCCUAGAC5' ( -27.50[63.07%] )
>LS-m0128_3p	|ppa008429m|PACid:17658918	|location[1227,1249]
5'AGUGAGAGUGAGAGAAAGAGGCA3'
||x|||||x|||||||||||ox|
3'UACUCUUACUCUUAUACUCUCUCUCUCUCUCUUUCUCUCUCGCGGUUUAAAUCGUAUUUGUUCACAUCUA5' ( -29.20[67.28%] )
>LS-m0128_3p	|ppa009366m|PACid:17664168	|location[2,24]
5'AGUGAGAGUGAGAGAAAGAGGCA3'
||x|||||x|||||||||||ox|
3'AAACUCUGCCGCUACAAACCCACUCUACUCUCUCUCUCUCUCUCUUUCUCUUUC5' ( -28.70[66.13%] )
>LS-m0128_3p	|ppa009800m|PACid:17649667	|location[54,76]
5'AGUGAGAGUGAGAGAAAGAGGCA3'
||x|||||x||||||x|||||x|
3'GACUUUCCAGUGACUCCGUCGGUAACGAACUCUCUCUCUCUCUCUCUCUCCCUGCCUUACCCAACUAUUAAAAUGUCAUGAUA5' ( -27.50[63.22%] )
>LS-m0128_3p	|ppa010373m|PACid:17654303	|location[29,51]
5'AGUGAGAGUGAGAGAAAGAGGCA3'
||x|||||x||||||x||||||x
3'GAACUCUCUCUCUCUCUCUCUCUCUCUCUCUCUCUCUCUCUCUCUCUCUCCGCACGGACUCCCCUUUACUUACUCUCCACC5' ( -32.20[73.85%] )
>LS-m0128_3p	|ppa011180m|PACid:17644875	|location[769,791]
5'AGUGAGAGUGAGAGAAAGAGGCA3'
||||||||x||||||x||||ox|
3'AAACAUACAAUUUUCUUUCUCCUUUUUUUCUCACUCUCUCUCUCUCUCUCUCUUCUUUUUUCUUUUUUUCUUUUACCCUUCUC5' ( -29.10[66.90%] )
>LS-m0128_3p	|ppa012324m|PACid:17658317	|location[662,684]
5'AGUGAGAGUGAGAGAAAGAGGCA3'
||x|||||x||||||x|||||x|
3'CUAAUAAUCUAUUAUAUUACACACACACACUCUCUCUCUCUCUCUCUCUCCCUCUCCCUCUCCAAUAUCGGACUAUAUGUACU5' ( -29.30[67.51%] )
>LS-m0128_3p	|ppa010547m|PACid:17641573	|location[12,34]
5'AGUGAGAGUGAGAGAAAGAGGCA3'
||x|||||x||||||x||||||x
3'GUCUUUUUUCCAACUCUCUCUCUCUCUCUCUCUCUCUCUCUCUCUCUCUCCGGGAGCAAACCCC5' ( -31.90[73.33%] )
>LS-m0128_3p	|ppa026978m|PACid:17663530	|location[22,44]
5'AGUGAGAGUGAGAGAAAGAGGCA3'
|xo|||||||||||x|x||||||
3'GACCGGUACCUCCCGCCCUAGUUCAACGUCUAGCUCUCACUCUCCUCCUCCGUCUUUCGAUUCGGAAACACGUA5' ( -31.00[71.43%] )
>LS-m0128_3p	|ppa000478m|PACid:17669277	|location[75,97]
5'AGUGAGAGUGAGAGAAAGAGGCA3'
||x|||||x||||||x||||o||
3'UGUUUGUUGGUGUGUAGGUCUUCUGCUUCUUCUCUCUCUCUCUCUGUCUCUGUCUCUGUCUCGAGUCUCUUUCGAAAGAGAGA5' ( -29.20[67.28%] )
>LS-m0128_3p	|ppa010548m|PACid:17646206	|location[112,134]
5'AGUGAGAGUGAGAGAAAGAGGCA3'
||x|||||x|||||||||||ox|
3'CUUUUGGGAUUUCUUUCUAUUCUCUCUCUCUCUCUCUCUCUCUCUUUCUCUUUCUAGUCUCGAACAGAACAUCGAAUCUCAAA5' ( -28.70[66.13%] )
>LS-m0128_3p	|ppa010577m|PACid:17646207	|location[112,134]
5'AGUGAGAGUGAGAGAAAGAGGCA3'
||x|||||x|||||||||||ox|
3'CUUUUGGGAUUUCUUUCUAUUCUCUCUCUCUCUCUCUCUCUCUCUUUCUCUUUCUAGUCUCGAACAGAACAUCGAAUCUCAAA5' ( -28.70[66.13%] )
>LS-m0128_3p	|ppa011531m|PACid:17646456	|location[69,91]
5'AGUGAGAGUGAGAGAAAGAGGCA3'
||x|||||x||||||x||||||x
3'UUACGUGUCAAACAGAUCCCAAAAUCCCUUUCUCUCUCUCUCUCUCUCUCCGAAAACCAAAAACCCCUCCUCUGUCUGCUCCC5' ( -32.10[73.62%] )
>LS-m0128_3p	|ppa013998m|PACid:17660745	|location[12,34]
5'AGUGAGAGUGAGAGAAAGAGGCA3'
||x|||||x||||||x||||o||
3'UCUCUCUCUCUCUCUCUCUCUCUCUCUCUCUCUCUCUCUCUCUCUCUCUCUGUUCCUUAUUCUC5' ( -29.30[67.36%] )
>LS-m0128_3p	|ppa014014m|PACid:17668554	|location[1682,1704]
5'AGUGAGAGUGAGAGAAAGAGGCA3'
||x|||||x||||||||||||xx
3'CAUAAAAUUCGCUCUCUCUCUCUCUCUCUCUCUCUCUCUCUCUCUUUCUCCCGUAUCUGAACAACACACACACGAGGGUUCAA5' ( -31.80[73.10%] )
>LS-m0128_3p	|ppa003942m|PACid:17668672	|location[19,41]
5'AGUGAGAGUGAGAGAAAGAGGCA3'
||x|||||x|||||||||||ox|
3'CUAACUACGUGAAAAUCGAGAGUCUCUUUCUCUCUCUCUCUCUCUUUCUCUCUCUCUCUAAACAUUUUAUC5' ( -28.60[65.90%] )
>LS-m0128_3p	|ppa007829m|PACid:17652806	|location[34,56]
5'AGUGAGAGUGAGAGAAAGAGGCA3'
||x|||||x||||||x|||||x|
3'GCUUCACUUCGUCUCUCGUUCUCCUCUCUCUCUCUCUCUCUCUCUCUCUCCUUGCACUCUUACCCUUUAUAUUUCGAAGAUUU5' ( -27.30[62.76%] )
>LS-m0128_3p	|ppa008853m|PACid:17645343	|location[132,154]
5'AGUGAGAGUGAGAGAAAGAGGCA3'
||x|||||x||||||x|||||x|
3'UCUUUAGUCUUUGGGAUUUUAAACUUAGCGUCUCUCUCUCUCUCUCUCUCCCUAACUUAAAACUUUGGGAUUUUAACCUAGGU5' ( -28.10[63.57%] )
>LS-m0128_3p	|ppa008974m|PACid:17657114	|location[598,620]
5'AGUGAGAGUGAGAGAAAGAGGCA3'
||x|||||x||||||x|||||x|
3'CCUUCCACCACCUGUCACCUCUCAUUCACCUCUCUCUCUCUCUCUCUCUCCCUCUUCUUCUACUACUACUGCUAUACCCUUUA5' ( -27.50[63.36%] )
>LS-m0128_3p	|ppa009199m|PACid:17647425	|location[938,960]
5'AGUGAGAGUGAGAGAAAGAGGCA3'
||x|||||x||||||x|||||x|
3'UCUCUCUCUCUCUCUCUCUCUCUCUCUCUCUCUCUCUCUCUCUCUCUCUCCAUAACUUUCUUUAGUGUAGGGGACGGACGCGU5' ( -27.70[63.53%] )
>LS-m0128_3p	|ppa009768m|PACid:17645230	|location[72,94]
5'AGUGAGAGUGAGAGAAAGAGGCA3'
||x|||||x||||||x|||||x|
3'UUCACCUCAUCUAUCAUCUCUCUCUUUCUCUCUCUCUCUCUCUCUCUCUCCCUAUACUCUUUACUUUCUCUUUUAAUCCCCUG5' ( -27.50[63.07%] )
>LS-m0128_3p	|ppa010226m|PACid:17648802	|location[32,54]
5'AGUGAGAGUGAGAGAAAGAGGCA3'
|||x||||x||||||x|||||x|
3'GUACACUUGCUUUCGGUAACGGCGUCUCUCUCAGUCUCUCUCUCUCUCUCCAUCUCUCUCUCUCUCUCUCUCUCUCUCUCUCA5' ( -27.60[63.59%] )
>LS-m0128_3p	|ppa012435m|PACid:17659836	|location[836,858]
5'AGUGAGAGUGAGAGAAAGAGGCA3'
||x|||||x||||||x|||||x|
3'AUUCUCUCUCUCUCUCUCUCUCUCUCUCUCUCUCUCUCUCUCUCUCUCUCCCUGAUAGAGUACAGGUUUCAAGUGUGUCACAA5' ( -27.50[63.22%] )
>LS-m0128_3p	|ppa014102m|PACid:17666445	|location[184,206]
5'AGUGAGAGUGAGAGAAAGAGGCA3'
||||||||||||||||||||ox|
3'GGUGAGGGGUAAAAGAGAGAACCAUCUCUAUCACUCUCACUCUCUUUCUCUCUCUCGCCGUAUAUAUUCUUUCUUAUUCCCCC5' ( -37.20[84.55%] )
>LS-m0128_3p	|ppa021754m|PACid:17660583	|location[17,39]
5'AGUGAGAGUGAGAGAAAGAGGCA3'
||||||||x||||||x||||ox|
3'UCUCUCUCUCUCUCUCUCUCUCUCUCUCUCUCACUCUCUCUCUCUCUCUCUCUCUCUCUCUCAUCCGUA5' ( -29.10[67.05%] )
>LS-m0128_3p	|ppa025212m|PACid:17660326	|location[81,103]
5'AGUGAGAGUGAGAGAAAGAGGCA3'
||||||||x||||||x||||ox|
3'UUUUGGACGUCGUCCGUGAUGAAAACUCUCUCACUCUCUCUCUCUCUCUCUCUAGAAGACAGAGACUUUUGUCCCCUCCUUCU5' ( -29.30[67.20%] )
>LS-m0128_3p	|ppa001422m|PACid:17658120	|location[5,27]
5'AGUGAGAGUGAGAGAAAGAGGCA3'
||x|||||x||||||x||||||x
3'AAACGCAAAAUCUCUCUCUCUCUCUCUCUCUCUCUCUCUCUCUCUCUCUCCGCCCUC5' ( -32.20[74.19%] )
>LS-m0128_3p	|ppa001763m|PACid:17658121	|location[5,27]
5'AGUGAGAGUGAGAGAAAGAGGCA3'
||x|||||x||||||x||||||x
3'AAACGCAAAAUCUCUCUCUCUCUCUCUCUCUCUCUCUCUCUCUCUCUCUCCGCCCUC5' ( -32.20[74.19%] )
>LS-m0128_3p	|ppa005312m|PACid:17641427	|location[2,24]
5'AGUGAGAGUGAGAGAAAGAGGCA3'
||||||||x||||||x|||||x|
3'ACUCUUCCACUCGGUAACCAUAUCCGACAGUCACUCUCUCUCUCUCUCUCCUUC5' ( -31.90[72.50%] )
>LS-m0128_3p	|ppa005661m|PACid:17648054	|location[28,50]
5'AGUGAGAGUGAGAGAAAGAGGCA3'
||x|||||x|||||||||||ox|
3'UCUCUCUCGUCUCUCUCACCAGACUUCGAAUCUCUCUCUCUCUCUUUCUCUCUCGUUGCCCCCGACGCGUCUCGUUUCUC5' ( -29.60[67.27%] )
>LS-m0128_3p	|ppa007358m|PACid:17644063	|location[67,89]
5'AGUGAGAGUGAGAGAAAGAGGCA3'
||x|||||x||||||x||||o||
3'UGGUUACCUGAAACAUGCUCUCUCUCUCUCUCUCUCUCUCUCUCUCUCUCUGUCUCUCUGUCUCUCUCUCUUUACGACCAAAA5' ( -29.20[67.28%] )
>LS-m0128_3p	|ppa013259m|PACid:17653030	|location[451,473]
5'AGUGAGAGUGAGAGAAAGAGGCA3'
||||||||x||||||x||||ox|
3'GUUGGAGUUAGAUUCCGUGAACUUACUCACUCACUCUCUCUCUCUCUCUCUCUGGUGAGUCAACAGCAUUCAUGCCGUGAGCA5' ( -31.60[72.64%] )
>LS-m0128_3p	|ppa002415m|PACid:17640648	|location[51,73]
5'AGUGAGAGUGAGAGAAAGAGGCA3'
||||||||x||||||x||||ox|
3'AUUCAGCAGUUAUUCAGCAGUCUCCGUGCGUCACUCUCUCUCUCUCUCUCUCUCUCUCUCAACCUCCUCGCAACUCAUAAACA5' ( -29.70[67.50%] )
>LS-m0128_3p	|ppa006364m|PACid:17646626	|location[12,34]
5'AGUGAGAGUGAGAGAAAGAGGCA3'
||x|||||x||||||x||||o||
3'UCUCUCUUUCAAAGUCAGAAACUCUUCAUCUCUCUCUCUCUCUCUCUCUCUGUCACCUAAGGGA5' ( -29.20[67.28%] )
>LS-m0128_3p	|ppa009540m|PACid:17646995	|location[2,24]
5'AGUGAGAGUGAGAGAAAGAGGCA3'
||x|||||x||||||x|||||x|
3'GAAAACUUUAAAGAUCUCUCUCUCUCUCUCUCUCUCUCUCUCUCUCUCUCCCUC5' ( -27.50[63.36%] )
>LS-m0128_3p	|ppa010954m|PACid:17667108	|location[3,25]
5'AGUGAGAGUGAGAGAAAGAGGCA3'
||x|||||x||||||x|||||x|
3'GGACUCGUCCUUUAUGUCUCUCUCUCUCUCUCUCUCUCUCUCUCUCUCUCCUUUC5' ( -27.30[62.76%] )
>LS-m0128_3p	|ppa011112m|PACid:17657156	|location[43,65]
5'AGUGAGAGUGAGAGAAAGAGGCA3'
||||||||x||||||x||||ox|
3'GACGAACCAGUACCACUUAGGCAGACCCAGUCACUCUCUCUCUCUCUCUCUCUCUCUCUCUCUCUCUCUCUCUCCUCGUUUAA5' ( -29.70[67.50%] )
>LS-m0128_3p	|ppa012916m|PACid:17663439	|location[83,105]
5'AGUGAGAGUGAGAGAAAGAGGCA3'
||x|||||x||||||x||||o||
3'UAACUUAUAAUCAGAGUCACUCUCUCUCUCUCUCUCUCUCUCUCUCUCUCUGUUACCUCAAAACCUUCUAGAAUAAUAGACGU5' ( -29.70[68.28%] )
>LS-m0128_3p	|ppa013504m|PACid:17662588	|location[107,129]
5'AGUGAGAGUGAGAGAAAGAGGCA3'
||||||||x||||||x||||o|x
3'UAUCCCAAAGCAAAGCACUCACUCACUCACUCACUCUCUCUCUCUCUCUCUGCCGGCUCACUCACACUCUCUCUCAGACUAUC5' ( -33.50[77.19%] )
>LS-m0128_3p	|ppa013679m|PACid:17659893	|location[85,107]
5'AGUGAGAGUGAGAGAAAGAGGCA3'
||||||||x||||||x||||o|x
3'CCUCUCUUUAUCCCAAAGCAAAGCACUCACUCACUCUCUCUCUCUCUCUCUGCCCGCUCACUCACACUCUCUCUCAUAUUAAG5' ( -33.50[77.19%] )
>LS-m0128_3p	|ppa013674m|PACid:17659894	|location[85,107]
5'AGUGAGAGUGAGAGAAAGAGGCA3'
||||||||x||||||x||||o|x
3'CCUCUCUUUAUCCCAAAGCAAAGCACUCACUCACUCUCUCUCUCUCUCUCUGCCCGCUCACUCACACUCUCUCUCAUAUUAAG5' ( -33.50[77.19%] )
>LS-m0128_3p	|ppa014010m|PACid:17663407	|location[55,77]
5'AGUGAGAGUGAGAGAAAGAGGCA3'
||x|||||x||||||x|||o|||
3'UCUUGGGUUAACUCUCUCUCUCUCUCUCUCUCUCUCUCUCUCUCUCUCUUCGUCUCUUACACUCCUCCCCCUUCUCUCUCAAA5' ( -29.20[67.28%] )
>LS-m0130_5p	|ppa006634m|PACid:17655522	|location[1241,1261]
5'CAGCCAAGGAUGACUUGCCGG3'
x|||||||o||||x||||||x
3'GGUAAGUAGAUACGGUGUUCGUGUUCUUGUUUCGGUUCUUACUUAACGGCGGACCGUUUGUGUAACGGUUUCUAUAUUGGU5' ( -30.00[68.65%] )
>LS-m0130_5p	|ppa012173m|PACid:17666161	|location[698,718]
5'CAGCCAAGGAUGACUUGCCGG3'
x|||||||o||||x|||||x|
3'GUGUUGUGGGUUAUUAAUGUUUUCAUUGGUUUCGGUUCUUACUAAACGGACUAUAUCUGUAACGUGUCGUCCCAAAGUGGG5' ( -28.00[64.22%] )
>LS-m0132_3p	|ppa000092m|PACid:17654523	|location[925,945]
5'UGCCAAAGGAGAAUUGCCCUG3'
|||x|x|||||||||||||oo
3'UUAAAGUGUUGAGAGUAGUCUUAACAGUGAACGAUGUCCUCUUAACGGGGUUUGUUAAGGAAGAAGGGUCAGAUCAACUAG5' ( -29.90[73.83%] )
>LS-m0132_3p	|ppa004552m|PACid:17655549	|location[324,344]
5'UGCCAAAGGAGAAUUGCCCUG3'
||||x|x||||||o|x|||||
3'GUUGUUGGACCCGUCCGUUAACUUCUAGUUACGGCUCCCUCUUGAAGGGACCAAAGCCUAGCAGUUGACGACGGGUCCUAC5' ( -25.90[63.95%] )
>LS-m0132_3p	|ppa013353m|PACid:17660967	|location[454,474]
5'UGCCAAAGGAGAAUUGCCCUG3'
x||||||ox||||||||x|||
3'GUGUCGGGUCUAAUGUACAAUCGGUUUGUUCCGGUUUUGUCUUAACGAGACGUGAAUGGUUCAGGGGGUGAUACGUUUAGA5' ( -25.30[62.62%] )
>LS-m0132_3p	|ppa024435m|PACid:17650881	|location[248,268]
5'UGCCAAAGGAGAAUUGCCCUG3'
xo||||||o|||x||||||||
3'GAAAGAAAGAAGGGUUAAACAGUGGUUCGGUUGGUUUCUUCUGAACGGGACGGUUACACGGUGUUUCACGGUGUGGUAACU5' ( -30.50[75.12%] )
>LS-m0132_3p	|ppa025234m|PACid:17662545	|location[248,268]
5'UGCCAAAGGAGAAUUGCCCUG3'
x|||||||o|||x||||||||
3'GAAAAAAGGAUGGUUCAAAUAGAGGUUCGGUCGGUUUCUUCUCAACGGGACGAUCCCAAGGUUUGUUUCGUUGGGGUCAAU5' ( -32.80[80.79%] )
>LS-m0134_3p	|ppa019670m|PACid:17649830	|location[266,286]
5'CCAACGUCUGGCUUUUGGUGA3'
||||x||||||xxo|||||||
3'CUUCUGGUCACUAAAACAACAACGAUUCCAGGUUUCAGACCUCGAACCACUCGAAAGGUUAUCACCAUAGUCCCUAUCUUG5' ( -25.90[64.91%] )
>LS-m0134_3p	|ppa002944m|PACid:17662501	|location[1081,1101]
5'CCAACGUCUGGCUUUUGGUGA3'
|||x|x||||||||o||x|||
3'GAGGUCUGUUUGUAUACUUCUAGGAAUGGUGGUAGGAGACCGAAGACGACUCGAACGGGUAAUCCGGAGAAACGUAAUUAC5' ( -27.20[69.04%] )
>LS-m0135_5p	|ppa024028m|PACid:17654040	|location[670,690]
5'AGCUAGGUGCAACAAGUUCAA3'
||||||||x||xx||o|||||
3'CCGUGGUCAAAAACGUCGUGCAAGACUUGGUCGAUCCAGGUGAUUUAAGUUUUGACUUUGUGCCUGGCGUAGUGUUCUUGA5' ( -23.10[63.11%] )
>LS-m0135_5p	|ppa002274m|PACid:17657034	|location[1862,1882]
5'AGCUAGGUGCAACAAGUUCAA3'
|o|||||xo||||||x|||||
3'GUAGAAGAGGUAAAUAAUGUCCUUGUUCCCUUGAUCCCUGUUGUUGAAGUUGUCACCACAACCAAUAAUAUCGACCGACCG5' ( -23.90[66.39%] )
>LS-m0135_5p	|ppa014536m|PACid:17653015	|location[386,406]
5'AGCUAGGUGCAACAAGUUCAA3'
|||o|oo||||x|||||||||
3'GUUGAAAACAAAGUAAAAACUUCUAACAGAUCGGUUUACGUGGUUCAAGUUUUGGUUACUUAUCUUCAUAAAGAAGAGUAC5' ( -27.00[73.77%] )
>LS-m0136_5p	|ppa008065m|PACid:17662475	|location[1058,1078]
5'UAGCCAAGGAUGACUUGCCUG3'
||||||||||||xx||||x||
3'AGUAGGAGAGGAACGCGAAGAGUUUCUUAGAUCGGUUCCUACGAAACGCACGAACUCCGUGACCAUGACGACCUUAGUCCA5' ( -27.30[66.42%] )
>LS-m0136_5p	|ppa011476m|PACid:17641245	|location[661,681]
5'UAGCCAAGGAUGACUUGCCUG3'
|||||||||||||xx||xx||
3'GAGUGAAUCAGUUGAGUCGACUCUCACACAAUCGGUUCCUACUAUACCAACUUCCUCUGUGGGGAGAUCAGGGUGGGUUUA5' ( -28.02[68.34%] )
>LS-m0136_5p	|ppa012173m|PACid:17666161	|location[698,718]
5'UAGCCAAGGAUGACUUGCCUG3'
x|||||||o||||x|||||||
3'GUGUUGUGGGUUAUUAAUGUUUUCAUUGGUUUCGGUUCUUACUAAACGGACUAUAUCUGUAACGUGUCGUCCCAAAGUGGG5' ( -30.30[74.26%] )
>LS-m0137_3p	|ppa007128m|PACid:17666929	|location[569,589]
5'UAGAGAGAUGGUCAGCAAUGU3'
x|o||||||||||||x||||x
3'GAAAAAGAGCUCGUACAGAGUAUUCUACUUCUUUCUCUACCAGUCUUUACUUCGCUCUGCGCAGUCCAGGUGGUACGGGUA5' ( -25.60[68.09%] )
>LS-m0137_3p	|ppa008085m|PACid:17652272	|location[74,94]
5'UAGAGAGAUGGUCAGCAAUGU3'
x|||||o|||||||x||||||
3'GGACCUAGUUUCCGAGUCUUCCCAUUCUACCUCUCUUUACCAGUAGUUACAACUACAACAAUCCUCACAUCCCGUUCUUUU5' ( -26.90[71.54%] )
>LS-m0137_3p	|ppa004550m|PACid:17669027	|location[1189,1209]
5'UAGAGAGAUGGUCAGCAAUGU3'
x|x||||||||o||||||||x
3'ACUCUCAUAUCCAACUUACGGUAAGUUCUUUUGUCUCUACCGGUCGUUACCCCAAUUUAGUCUAUGACGGCGCUAUUGCUG5' ( -30.70[81.43%] )
>LS-m0137_3p	|ppa004566m|PACid:17653878	|location[1189,1209]
5'UAGAGAGAUGGUCAGCAAUGU3'
x|x||||||||o||||||||x
3'ACUCUCAUAUCCAACUUACGGUAAGUUCUUUUGUCUCUACCGGUCGUUACCCCAAUUUAGUCUAUGACGACGCUAUUGAUG5' ( -30.70[81.43%] )
>LS-m0137_3p	|ppa006338m|PACid:17664200	|location[1004,1024]
5'UAGAGAGAUGGUCAGCAAUGU3'
||o||||x||||||||||x||
3'GUAAGGUUUGUAGUGUUUACAUCGAGAGUAAUUUCUCGACCAGUCGUUUCAUACCGGUCGUGUCCUUUCCUUGGGGUGACG5' ( -26.30[69.58%] )
>LS-m0137_3p	|ppa000722m|PACid:17667848	|location[392,412]
5'UAGAGAGAUGGUCAGCAAUGU3'
o||x|||||||o|||||||||
3'CUCGUCGUAGUCAGUUCUCGGGGUAAAGCUGUCCCUCUACCGGUCGUUACAGCCGUACCAAGUCCAGGUUUGGCCGGUGUU5' ( -32.10[84.92%] )
>LS-m0137_3p	|ppa003400m|PACid:17663891	|location[605,625]
5'UAGAGAGAUGGUCAGCAAUGU3'
ox|||||||||||x|||||x|
3'GAACUCGUACUGGUCCCGUAACGAGUGCACGACUCUCUACCAGACGUUAGACGAAACUUAAAGUACGGAGUGUUAAGGUCA5' ( -27.30[72.61%] )
>LS-m0138_5p	|ppa013986m|PACid:17666730	|location[35,55]
5'UGAGCCAAGGAUGACUUGCCA3'
|||||x||||||||||||x||
3'ACUACUUAACGUUUCAUCAGACGACCACGUACUCGUUUCCUACUGAACAGUACUAUAACUUCUCGUUCGAGAGUUCCAAUC5' ( -28.00[67.31%] )
>LS-m0138_5p	|ppb011730m|PACid:17654135	|location[115,135]
5'UGAGCCAAGGAUGACUUGCCA3'
||||||||||||xx||||x||
3'AGGUACUGUCAAAAAAAAAAAAAAAAAAAAACUCGGUUCCUAGGGAACUGUCGUAAACUGAGCACGAAUUAAUAUUUCAAG5' ( -28.30[68.03%] )
>LS-m0138_5p	|ppa002833m|PACid:17661921	|location[137,157]
5'UGAGCCAAGGAUGACUUGCCA3'
||||||xx||||xx|||||||
3'CAGCACAACACUUACCGAAGCUCCCUCCAAACUCGGAACCUAACGAACGGUUUGCACUCUCCUUUAAGUCGAGACUAAGGC5' ( -27.80[66.67%] )
>LS-m0138_5p	|ppa006028m|PACid:17665799	|location[3,23]
5'UGAGCCAAGGAUGACUUGCCA3'
x|||||||||||||x||x||x
3'AGUUGUAGUCAACCGAACUUGGCUUUGGGUCCUCGGUUCCUACUAAAGGGGUA5' ( -29.50[71.08%] )
>LS-m0138_5p	|ppa007941m|PACid:17649823	|location[281,301]
5'UGAGCCAAGGAUGACUUGCCA3'
x|||||||||||||x||x||x
3'AGUUGUAGUCAACCGAACUUUGCUUUGGGUCCUCGGUUCCUACUAAAGGGGUACUCUCAGGGGGAUGGAUUAUUCUUGGGA5' ( -29.66[71.47%] )
>LS-m0139_5p	|ppa013986m|PACid:17666730	|location[35,55]
5'UGAGCCAAGGAUGACUUGCCA3'
|||||x||||||||||||x||
3'ACUACUUAACGUUUCAUCAGACGACCACGUACUCGUUUCCUACUGAACAGUACUAUAACUUCUCGUUCGAGAGUUCCAAUC5' ( -28.00[67.31%] )
>LS-m0139_5p	|ppb011730m|PACid:17654135	|location[115,135]
5'UGAGCCAAGGAUGACUUGCCA3'
||||||||||||xx||||x||
3'AGGUACUGUCAAAAAAAAAAAAAAAAAAAAACUCGGUUCCUAGGGAACUGUCGUAAACUGAGCACGAAUUAAUAUUUCAAG5' ( -28.30[68.03%] )
>LS-m0139_5p	|ppa002833m|PACid:17661921	|location[137,157]
5'UGAGCCAAGGAUGACUUGCCA3'
||||||xx||||xx|||||||
3'CAGCACAACACUUACCGAAGCUCCCUCCAAACUCGGAACCUAACGAACGGUUUGCACUCUCCUUUAAGUCGAGACUAAGGC5' ( -27.80[66.67%] )
>LS-m0139_5p	|ppa006028m|PACid:17665799	|location[3,23]
5'UGAGCCAAGGAUGACUUGCCA3'
x|||||||||||||x||x||x
3'AGUUGUAGUCAACCGAACUUGGCUUUGGGUCCUCGGUUCCUACUAAAGGGGUA5' ( -29.50[71.08%] )
>LS-m0139_5p	|ppa007941m|PACid:17649823	|location[281,301]
5'UGAGCCAAGGAUGACUUGCCA3'
x|||||||||||||x||x||x
3'AGUUGUAGUCAACCGAACUUUGCUUUGGGUCCUCGGUUCCUACUAAAGGGGUACUCUCAGGGGGAUGGAUUAUUCUUGGGA5' ( -29.66[71.47%] )
>LS-m0140_5p	|ppa003028m|PACid:17650848	|location[926,946]
5'CAAGUUGUUCUUGGUUCUGUU3'
xx||||||||||||||||xo|
3'CUUAUACCGAUGGUAGAUCGACGUAGUGAAAGUCAACAAGAACCAAGAAGAGAUGGGGUACGCAUAACGGUUGGAAACCAA5' ( -25.70[75.81%] )
>LS-m0140_5p	|ppa010638m|PACid:17662233	|location[749,769]
5'CAAGUUGUUCUUGGUUCUGUU3'
||x|||||||||||||x|o||
3'UCCAGGUGAUAGGAACCUCUACUGGAAUUGGUACAACAAGAACCAAUAUAAUUCUAUUGUACGUCUAGCACUCCCCCACUU5' ( -21.70[64.01%] )
>LS-m0140_5p	|ppb015844m|PACid:17664441	|location[47,67]
5'CAAGUUGUUCUUGGUUCUGUU3'
xx||||||||||||||||xo|
3'CUUAUACCGAUGGUACAUCGACGUAGUGAAAGUCAACAAGAACCAAGAAGAGAUGGGGUACGCAUAACGGUUGGAAACCAA5' ( -25.70[75.81%] )
>LS-m0140_5p	|ppa005190m|PACid:17656241	|location[199,219]
5'CAAGUUGUUCUUGGUUCUGUU3'
x|||x|||||||||x||||||
3'CAGAAACUUCAACAUCGUUUUGAAGAACUUCUUCCACAAGAACCCAGACAACCGCUUACACUACAGUACCCAAAAGUACUA5' ( -22.10[66.37%] )
>LS-m0140_5p	|ppa022977m|PACid:17651265	|location[258,278]
5'CAAGUUGUUCUUGGUUCUGUU3'
x|||x|||||||||x||||||
3'AAGUAGACGGAGGUUAUGAGUGAAGAACUUCUUCCACAAGAACCCAGACAACCGCUUACACUACACUACAGUACCCAAAAG5' ( -22.10[66.37%] )
>LS-m0140_5p	|ppa024077m|PACid:17665595	|location[322,342]
5'CAAGUUGUUCUUGGUUCUGUU3'
x|||x|||||||||x||||||
3'CAGAAACUUCAACAUCGUUUUGAAGAACUUCUUCCACAAGAACCCAGACAACCGCUUACAAUACAGUACCCAAAAGUACUA5' ( -22.10[66.37%] )
>LS-m0140_5p	|ppa025083m|PACid:17664597	|location[196,216]
5'CAAGUUGUUCUUGGUUCUGUU3'
x|||x|||||||||x||||||
3'CAGAAACUUCAACAUCGUUUUGAAGAACUUCUUCCACAAGAACCCAGACAACCGCUUACACUACAGUACCCAAAAGUACUA5' ( -22.10[66.37%] )
>LS-m0140_5p	|ppa025126m|PACid:17659547	|location[346,366]
5'CAAGUUGUUCUUGGUUCUGUU3'
x|||x|||||||||x||||||
3'CAGAAACUUCAACAUCGUUUUGAAGAACUUCUUCCACAAGAACCCAGACAACCGCUUACACUACAGUACCCAAAAGUACUA5' ( -22.10[66.37%] )
>LS-m0140_5p	|ppa000885m|PACid:17642508	|location[2144,2164]
5'CAAGUUGUUCUUGGUUCUGUU3'
|||||x|||||||x||||||x
3'GUUACCUGGUUAAACAUUAGACCACGUUUCGUUCAUCAAGAACGAAGACACAAGAUACUCUCCAACUAUAACUGUGGUAGU5' ( -23.70[71.60%] )
>LS-m0140_5p	|ppa003484m|PACid:17647186	|location[583,603]
5'CAAGUUGUUCUUGGUUCUGUU3'
||x||||o||||||||x||||
3'AAAAGAGCGGAGGUGGUUGGUGUCGUAGGAGUACAACGAGAACCAACACAAGUGCGUGUACGUUGAGGAGGAGAACGUGAA5' ( -23.60[69.62%] )
>LS-m0140_5p	|ppa013343m|PACid:17640491	|location[43,63]
5'CAAGUUGUUCUUGGUUCUGUU3'
|||||||||||||oxx|o|||
3'GAGCGAGCAGCCUAGUCUCCGCUCUCCCGAGUUCAACAAGAACUUCGGCAAAACCUCGGGGUAUACGUGGGUGUUACGAAG5' ( -25.00[73.96%] )
>LS-m0140_5p	|ppa025303m|PACid:17648029	|location[332,352]
5'CAAGUUGUUCUUGGUUCUGUU3'
|||||xx|||||||o|||||x
3'UCUCAGGUAUCGGUUUGAGUCUUUCGUGUGGUUCAUAAAGAACCGAGACAUCUAAUUUGUCCAUAACGAAGUUAUGACCAU5' ( -25.40[74.71%] )
>LS-m0140_5p	|ppa023426m|PACid:17652632	|location[1814,1834]
5'CAAGUUGUUCUUGGUUCUGUU3'
|||||x|||||||x||||||x
3'GUUACCUGGUUAAACAUUAGACCACGUUUCGUUCAUCAAGAACGAAGACACAAGAUGCUCUCCAACUAUAACUGUGGUAGU5' ( -23.70[71.60%] )
>LS-m0142_5p	|ppa014945m|PACid:17647390	|location[150,172]
5'AAUCUGUGAGCUCGUCCAACCUA3'
||||||||||||||||||||||x
3'AAUUUUCAACGUGAGAGGUCCGAGGCAGCUUAGACACUCGAGCAGGUUGGAAUACAAUACAACUUAACCCUUACCUAAAUAA5' ( -42.20[98.83%] )
>LS-m0142_5p	|ppa017445m|PACid:17664329	|location[150,172]
5'AAUCUGUGAGCUCGUCCAACCUA3'
||||||||||||||||||||||x
3'AAUUUUCAACGUGAGAGGUCCGAGGCAGCUUAGACACUCGAGCAGGUUGGAAUACAAUACAACUUAACCCUUACCUAAACAA5' ( -42.20[98.83%] )
>LS-m0144_5p	|ppa015011m|PACid:17647542	|location[14,36]
5'UUCACGGAAUGAAUUUGAGGGUA3'
||||||o||||x||||||x||x|
3'GGUAAAUCCUGGUAGGUACAGUGGUAGACCAAGUGCUUUACCUAAACUACCCUUUAGUGAAGGGUA5' ( -24.70[64.49%] )
>LS-m0146_3p	|ppa002972m|PACid:17646056	|location[495,515]
5'ACCCCGGGAAGCACACCAUUC3'
|||||o|o|||||x||||||x
3'AGUUUGUGUUGGAAGACUUAUGAUUGAGGUUGGGGUCUUUCGUUUGGUAACGGUAACAAUACUAACGACAAUGAUGAAAAA5' ( -30.20[68.95%] )
>LS-m0146_3p	|ppa001516m|PACid:17664660	|location[2196,2216]
5'ACCCCGGGAAGCACACCAUUC3'
|x|||||||||xx||||||||
3'CAACCUUGUUCAAACGACCUGUUUCUUUAUUCGGGCCCUUCUCGUGGUAAGGCCUUAAGUGGGCGCUGUAGAUCGACGUGG5' ( -30.70[70.09%] )
>LS-m0147_3p	|ppa001073m|PACid:17644095	|location[2567,2587]
5'UGAAAAACUGAAGAAGAGCAA3'
||xx|||||||||||||||||
3'GUACCACGUACCGUACGGCCGGUGGUCCUUACCAUUUGACUUCUUCUCGUUUACGUCGUGUACGGAACUCUUGUCUACUAC5' ( -26.00[81.50%] )
>LS-m0147_3p	|ppa026786m|PACid:17656332	|location[2837,2857]
5'UGAAAAACUGAAGAAGAGCAA3'
|||x|||x|||||||||||x|
3'GGUACCGAAAACCUGACAGGGAAGAAAAACACUCUUUCACUUCUUCUCGCUCACUAUUCUCUUCGCACUCUUUCUUCGCUC5' ( -21.60[68.14%] )
>LS-m0147_3p	|ppb016836m|PACid:17656603	|location[647,667]
5'UGAAAAACUGAAGAAGAGCAA3'
||||x||||||||||x|||x|
3'UUCGUCGUGGUCUAAAUUCUCGUAAUAAAGACUUCUUGACUUCUUGUCGAUGGUCGAAAAGUACUCCUCCCCAAUCGAGAA5' ( -23.70[73.83%] )
>LS-m0147_3p	|ppa001197m|PACid:17666757	|location[612,632]
5'UGAAAAACUGAAGAAGAGCAA3'
||x|x|||||||||||x||||
3'CGGGUGAAUCUCUUAAGUGAGAGGGUUAACACCUAUUGACUUCUUCCCGUUUGAUACUCUUGUCCCGGAGAAAGACGACAG5' ( -20.30[63.84%] )
>LS-m0147_3p	|ppa012026m|PACid:17647707	|location[567,587]
5'UGAAAAACUGAAGAAGAGCAA3'
oo|||||||||xx||||||||
3'UUAUUAUACAAAAUGGGUUUGUGUUCCUGUGUUUUUUGACUCAUUCUCGUUUGUUCUUUUCGUACAUUAAGAGUGGAACUA5' ( -22.00[68.97%] )
>LS-m0147_3p	|ppa010547m|PACid:17641573	|location[166,186]
5'UGAAAAACUGAAGAAGAGCAA3'
|||||||||||||||o|xxx|
3'AUUCACUAGAUCGAAUUUAAUAUACGACGGACUUUUUGACUUCUUUUAAAUAUAAGCAUUAUUAUAUAAUAAAUAUAUUUA5' ( -21.90[68.01%] )
>LS-m0147_3p	|ppa006032m|PACid:17652783	|location[84,104]
5'UGAAAAACUGAAGAAGAGCAA3'
|o||x|||x|||||||||||x
3'CCAACGACUUCUACACUCUUACUAUUCUCUAUUUCUUGUCUUCUUCUCGUCCUUUAAUACUUCCUUUCUUCGGUACCUACG5' ( -21.40[67.30%] )
>LS-m0147_3p	|ppa004386m|PACid:17645781	|location[49,69]
5'UGAAAAACUGAAGAAGAGCAA3'
x||||||||||||||||ox||
3'CCCAAUUCAGUAGUCUCAACUUCGUUGGAUUCUUUUUGACUUCUUCUUAUUCUAUCCGUCCCGUCUUCUUAAACUACGUCU5' ( -23.60[74.21%] )
>LS-m0148_5p	|ppa010437m|PACid:17642031	|location[1136,1156]
5'UCUAAUAGAGGUGGAGCCCAU3'
o|o|||||x|||x||||||||
3'UGAUGUAGAAAUUCUGCAAAACUUUUAAUGGGGUUAUCCCCAGCUCGGGUACGUGCGUCGACAAGACUGAAGACUCUGUUG5' ( -29.90[74.19%] )
>LS-m0150_5p	|ppb023941m|PACid:17664379	|location[83,105]
5'CGUAAAAGGAUAUUUAGACGACA3'
||||||||||||||||||||||x
3'AAAAACAACAAAGCAAAAUUUGUUUAGGCUGCAUUUUCCUAUAAAUCUGCUGCAAAACCAAAGUAUAUAUACAACACAAGAAU5' ( -35.20[100%] )
>LS-m0151_3p	|ppa001407m|PACid:17643515	|location[775,795]
5'GAGAUUAGAAGUAUGUAACCA3'
||||xo|||||o|||||x|||
3'UCGAUUAAAGUCUCAUACUAUCCGAAGUCACUCUUGUCUUCGUACAUAGGUGUGGGUUUCGACCGCUUUCCAUCUUCUCAA5' ( -25.50[75.67%] )
>LS-m0151_3p	|ppa017778m|PACid:17663650	|location[3545,3565]
5'GAGAUUAGAAGUAUGUAACCA3'
|||||xxo|||||||o|||||
3'UCAGGUGCGGGGUAUGUUUCGGAGGUGUAUCUCUACGUUUCAUACGUUGGUGCAUAGGGAAAUCGGUACGUUGAGGCAAAC5' ( -25.10[75.60%] )
>LS-m0153_3p	|ppa007570m|PACid:17661168	|location[1280,1302]
5'AGAGACAGAGAGAGACAGAGACA3'
|||||x|||||||||x|||||xx
3'UCUCUCUCUCUCUCUCUCUCUCUCUCUCUCUCUCUCUCUCUCUCUCUCUCUAAAAGUGUUCAAACCAUGAAGGGGACACCCAG5' ( -28.40[64.25%] )
>LS-m0153_3p	|ppa007570m|PACid:17661168	|location[1304,1326]
5'AGAGACAGAGAGAGACAGAGACA3'
|||||x|||||||||x|||||x|
3'UAGAAGUCUAUAUCUCUCUCUCUCUCUCUCUCUCUCUCUCUCUCUCUCUCUCUCUCUCUCUCUCUCUCUCUCUCUAAAAGUGU5' ( -28.80[65.16%] )
>LS-m0153_3p	|ppa007570m|PACid:17661168	|location[1328,1350]
5'AGAGACAGAGAGAGACAGAGACA3'
|||x|x|||||||||x|||||x|
3'AUGAGUAUGUACGUGUGUACUGUGUAGAAGUCUAUAUCUCUCUCUCUCUCUCUCUCUCUCUCUCUCUCUCUCUCUCUCUCUCU5' ( -28.80[64.57%] )
>LS-m0153_3p	|ppa008731m|PACid:17646504	|location[95,117]
5'AGAGACAGAGAGAGACAGAGACA3'
||x||x|||||||||x|||||x|
3'AUCUUUCUCUUUCACCCAAAACAAACAGAAUCACUCUCUCUCUCUCUCUCUCUCAUCCCAUCCCAACUAGACCAAAUAUUCUA5' ( -28.40[63.68%] )
>LS-m0153_3p	|ppa000535m|PACid:17656895	|location[17,39]
5'AGAGACAGAGAGAGACAGAGACA3'
|||||x|||||||||x|||||xx
3'UAUUUACCUUUGUCACUUUCUUUCUCUCCGUCUCUCUCUCUCUCUCUCUCUUCGCCCCGAAGCAAAACG5' ( -29.20[65.32%] )
>LS-m0153_3p	|ppa000858m|PACid:17648618	|location[178,200]
5'AGAGACAGAGAGAGACAGAGACA3'
|||||x|o|||||o|x|||||||
3'CUCUAAACAUUAAGUGUCUCUCUCUCUCUCUCUCUCUUUCUCUUUUUCUCUGUCGACUCAAAGUCUGUCUUUCUUUCUUCCAU5' ( -28.90[65.68%] )
>LS-m0153_3p	|ppa000857m|PACid:17648619	|location[178,200]
5'AGAGACAGAGAGAGACAGAGACA3'
|||||x|o|||||o|x|||||||
3'CUCUAAACAUUAAGUGUCUCUCUCUCUCUCUCUCUCUUUCUCUUUUUCUCUGUCGACUCAAAGUCUGUCUUUCUUUCUUCCAU5' ( -28.90[65.68%] )
>LS-m0153_3p	|ppa000893m|PACid:17648620	|location[178,200]
5'AGAGACAGAGAGAGACAGAGACA3'
|||||x|o|||||o|x|||||||
3'CUCUAAACAUUAAGUGUCUCUCUCUCUCUCUCUCUCUUUCUCUUUUUCUCUGUCGACUCAAAGUCUGUCUUUCUUUCUUCCAU5' ( -28.90[65.68%] )
>LS-m0153_3p	|ppa001125m|PACid:17655753	|location[10,32]
5'AGAGACAGAGAGAGACAGAGACA3'
|||||x|||||||||x|||||xx
3'AAUUCAAAACGCGGAGGCUCUUAGACUCUCUCUCUCUCUCUCUCUCUCUCUCCUCCCUUCUC5' ( -28.40[64.40%] )
>LS-m0153_3p	|ppa001554m|PACid:17656842	|location[2,24]
5'AGAGACAGAGAGAGACAGAGACA3'
|||||x|||||||||x|||||x|
3'CUUAGAGGCGGCAGGCUAGUUUCUUCUCUCUCUCUCUCUCUCUCUCUCUCUCUC5' ( -28.20[64.09%] )
>LS-m0153_3p	|ppa001983m|PACid:17666482	|location[2,24]
5'AGAGACAGAGAGAGACAGAGACA3'
|||||x|||||||||x|||||x|
3'GCUCUAGAUCCCAAAACGUCUCUCUCUCUCUCUCUCUCUCUCUCUCUCUCUCUC5' ( -28.80[65.45%] )
>LS-m0153_3p	|ppa002051m|PACid:17666483	|location[2,24]
5'AGAGACAGAGAGAGACAGAGACA3'
|||||x|||||||||x|||||x|
3'GCUCUAGAUCCCAAAACGUCUCUCUCUCUCUCUCUCUCUCUCUCUCUCUCUCUC5' ( -28.80[65.45%] )
>LS-m0153_3p	|ppa003124m|PACid:17646161	|location[2,24]
5'AGAGACAGAGAGAGACAGAGACA3'
|||||x|||||||||x|||||x|
3'UGCCCUAGUGUUGAACCAAACGACUCGAUCUCUCUCUCUCUCUCUCUCUCUCUC5' ( -28.80[65.45%] )
>LS-m0153_3p	|ppa003627m|PACid:17647709	|location[2,24]
5'AGAGACAGAGAGAGACAGAGACA3'
|||||x|||||||||x|||||x|
3'CGGCUGCUUGCCGGUAAUAAUCUCUCUCUCUCUCUCUCUCUCUCUCUCUCUCUC5' ( -28.80[65.45%] )
>LS-m0153_3p	|ppa003936m|PACid:17647787	|location[117,139]
5'AGAGACAGAGAGAGACAGAGACA3'
|||||x|||||||||x|||||xx
3'UCUCUCUCUCUCUCUCUCUCUCUCUCUCUCUCUCUCUCUCUCUCUCUCUCUCCACUUAAACUCUCGAGCGCCUGCGACCUCCC5' ( -28.20[63.80%] )
>LS-m0153_3p	|ppa003936m|PACid:17647787	|location[141,163]
5'AGAGACAGAGAGAGACAGAGACA3'
|||||x|||||||||x|||||x|
3'GAUAUAUAAUAUAUAUUUGCAUUCUCUCUCUCUCUCUCUCUCUCUCUCUCUCUCUCUCUCUCUCUCUCUCUCUCUCCACUUAA5' ( -28.20[64.09%] )
>LS-m0153_3p	|ppa004069m|PACid:17658666	|location[17,39]
5'AGAGACAGAGAGAGACAGAGACA3'
|||||x|||||o|||||||||x|
3'AAAUCGCACACUUUUGGUGGUAAACUACUUUCUCUCUCUCUUUCUGUCUCUUUCCCAGGUCGGAGAAAG5' ( -31.70[72.05%] )
>LS-m0153_3p	|ppa004339m|PACid:17657942	|location[2038,2060]
5'AGAGACAGAGAGAGACAGAGACA3'
|||||x|||||||||x|||xx||
3'UCUCUCUCUCUCUCUCUCUCUCUACGUAGUAUCGCUAAAUUCGACGAUGAGAAUCGU5' ( -28.40[64.25%] )
>LS-m0153_3p	|ppa005504m|PACid:17641894	|location[191,213]
5'AGAGACAGAGAGAGACAGAGACA3'
|||||||||||||||x|||||xx
3'CACACUCUUCGGAACCGUUGAGGCUCUUUCUCUCUGUCUCUCUCUCUCUCUAAGGUUUCAGGUCUUCCAAAUAUCCUAUCUAA5' ( -34.40[78.00%] )
>LS-m0153_3p	|ppa005770m|PACid:17652190	|location[1,23]
5'AGAGACAGAGAGAGACAGAGACA3'
|||||x|||||||||x|||||x|
[truncated: 3,173 more rows]

## Sheet: RC miRNA-target Alignment File
miRNA Identity	Target Identity	Location
>RC-m0001_5p	|ppa018782m|PACid:17666983	|location[550,570]
5'UGCGUGGCGUAGGUUAUCCGG3'
|o|||||||||||||||xx||
3'CAUCCAAUAGACCGCAACUCUGUCUGGGGUAUGCACCGCAUCCAAUAAACCUUCAAGCCCCAAGUAAUCUUAUACCGAAGA5' ( -31.20[72.22%] )
>RC-m0003_3p	|ppa012437m|PACid:17648072	|location[161,180]
5'AAAGACUAAAAUACCCUUGA3'
|||||||||||xxx|||||x
3'ACGCCUCUAACUUCUCCUCCACCUCCACCUUUUCUGAUUUUCCAGGAACAAUGACGCCAACCCUCGUAGCAGAUCCUCGU5' ( -17.40[60.84%] )
>RC-m0003_3p	|ppa013211m|PACid:17655878	|location[447,466]
5'AAAGACUAAAAUACCCUUGA3'
|x|||||x|||||||||oo|
3'UGAAAUUUUUGAUCGGUUUUUGAGUCAAUUUAUCUGAGUUUAUGGGAGUUAUAAAUUUGAGUGUAUUUUGGAUUCUUCCU5' ( -21.30[74.48%] )
>RC-m0003_3p	|ppa017834m|PACid:17641445	|location[71,90]
5'AAAGACUAAAAUACCCUUGA3'
||||||||||||||||||o|
3'GAAGUGGUGGGAGUGUUUGGAUCUUUUAUCUUUCUGAUUUUAUGGGAAUUUUAUAUACCUUUUAACUUACCACAAUUUCA5' ( -26.30[92.28%] )
>RC-m0004_3p	|ppa014955m|PACid:17651959	|location[575,595]
5'UCCUGGUUGUCACGAGUGCGU3'
||||x||||||||x|x|||o|
3'GCAUCUCUCACAUCCGGUCGAACAGAAGUUAGGAGCAACAGUGAUAACGUAUCCAUAGCUAUAACUCUCGUAGAGGAAAAA5' ( -26.40[62.56%] )
>RC-m0006_5p	|ppa003070m|PACid:17669114	|location[194,216]
5'UGGGUUUAUAAGGAGUUGAGCUA3'
||o|||||||||||||||x||x|
3'AGGGUGUAACUUUACAAUUCCCUGGAUCGGACUCAAAUAUUCCUCAACCCGUUGAAGGGGGUAACGGUUAACCAAAACUCCAC5' ( -29.90[75.51%] )
>RC-m0006_5p	|ppa003070m|PACid:17669114	|location[424,446]
5'UGGGUUUAUAAGGAGUUGAGCUA3'
||||||||||||||||||x||x|
3'AGGGUGUAACUUUACAAUUCCCUGGAUCAGACCCAAAUAUUCCUCAACCCGUUGAAGGGGGUAACGGUUAACCAAAACCCCAC5' ( -32.90[83.08%] )
>RC-m0007_5p	|ppa003070m|PACid:17669114	|location[194,216]
5'UGGGUUUAUAAGGAGUUGAGCUA3'
||o|||||||||||||||x||x|
3'AGGGUGUAACUUUACAAUUCCCUGGAUCGGACUCAAAUAUUCCUCAACCCGUUGAAGGGGGUAACGGUUAACCAAAACUCCAC5' ( -29.90[75.51%] )
>RC-m0007_5p	|ppa003070m|PACid:17669114	|location[424,446]
5'UGGGUUUAUAAGGAGUUGAGCUA3'
||||||||||||||||||x||x|
3'AGGGUGUAACUUUACAAUUCCCUGGAUCAGACCCAAAUAUUCCUCAACCCGUUGAAGGGGGUAACGGUUAACCAAAACCCCAC5' ( -32.90[83.08%] )
>RC-m0014_3p	|ppa001746m|PACid:17649234	|location[424,444]
5'UAGGAGGGUUGAUAAAGAUGA3'
ox|||||||||x||x||||||
3'UCUUUUGUACAAUAGUAGUUCUUAUUCGCAGACCUCCCAACAAUCUCUACUUUCGAGGUCUCCCUACCGCGGUAUGUCCUU5' ( -25.70[72.19%] )
>RC-m0014_3p	|ppa018512m|PACid:17657784	|location[1412,1432]
5'UAGGAGGGUUGAUAAAGAUGA3'
|||x|||||||||||||xoo|
3'GUCGAUAACACGGUCUCGACCGUGAUUGACAUCGUCCCAACUAUUUCGGUUGGUACGACGUGUAUAAACGAGCAAAGUUUU5' ( -24.20[68.56%] )
>RC-m0014_3p	|ppa020272m|PACid:17648626	|location[128,148]
5'UAGGAGGGUUGAUAAAGAUGA3'
x|o||||||||||x|||||x|
3'CUACUCCUCUUCCUACCCCCAGAUCCCAAACUUCUCCCAACUACUUCUAAUACAACAAUCGUCAACUCCCAUCCCGACCUC5' ( -23.50[65.83%] )
>RC-m0014_3p	|ppa002351m|PACid:17655395	|location[977,997]
5'UAGGAGGGUUGAUAAAGAUGA3'
o||x|||||||||x|||x|||
3'GAUAUGGCAACCGUUCUAGUUCGUUCUUUAGUCGUCCCAACUACUUCAACUUGGGCCGGAGUAUAGGUUACCUGGGUUUUA5' ( -22.10[62.08%] )
>RC-m0014_3p	|ppa027076m|PACid:17662055	|location[1039,1059]
5'UAGGAGGGUUGAUAAAGAUGA3'
|x|||||||||x||||xx|||
3'UACACGGUUCCGUACAUAGAGAACUGGGUCAACCUCCCAACGAUUUAGACUUGUUCUGGACUCCUGUCGACUCUUCCGUAU5' ( -23.30[66.01%] )
>RC-m0014_3p	|ppa004127m|PACid:17663486	|location[32,52]
5'UAGGAGGGUUGAUAAAGAUGA3'
x|ox|||||||||||||||||
3'AAAGACAUCGACUUAAACUUCAAUACCUGGUUUGUCCCAACUAUUUCUACUUUUCAUAACCUUCAUCAAACUUAUAGAGGU5' ( -27.00[75.84%] )
>RC-m0014_3p	|ppa015758m|PACid:17647146	|location[1553,1573]
5'UAGGAGGGUUGAUAAAGAUGA3'
|||x|||||||||||||xoo|
3'GUCGAUAACAGGGUCUCAACCGUGAUUGACAUCGUCCCAACUAUUUCGGUUGGUACGACGUGUAUAAACGAACAAAGUUUU5' ( -24.20[68.56%] )
>RC-m0014_3p	|ppa025579m|PACid:17660725	|location[32,52]
5'UAGGAGGGUUGAUAAAGAUGA3'
x|ox|||||||||||||||||
3'AAAGACAUCGACUUAAACUUCAAUACCUGGUUUGUCCCAACUAUUUCUACUUUUCAUAACCUUCAUCAAACUUAUAGAGGU5' ( -27.00[75.84%] )
>RC-m0014_3p	|ppa007501m|PACid:17645704	|location[1218,1238]
5'UAGGAGGGUUGAUAAAGAUGA3'
|||o|o||||||o|x||||||
3'CUACUUGUAUUUUUUGGUUUUUCCAUCUAUAUCUUUCCAACUGUAUCUACUUGUACUUCUUACAUGUGCGGAGGGUGAAAG5' ( -26.30[74.29%] )
>RC-m0014_3p	|ppa002125m|PACid:17654107	|location[110,130]
5'UAGGAGGGUUGAUAAAGAUGA3'
xx||||||||||xx|||||||
3'CUCGUCGGUAGUCUUAAAAGACACCACCAUCACCUCCCAACUUCUUCUACUCUACUUCUUUAAAUACUUCACUUUACUUUA5' ( -29.20[82.72%] )
>RC-m0014_3p	|ppa026299m|PACid:17659200	|location[1511,1531]
5'UAGGAGGGUUGAUAAAGAUGA3'
|||x|||||||||||||xoo|
3'GUCGAUAACACGGUCUCGACCGUGAUUGACAUCGUCCCAACUAUUUCGGUUGGUACGACGUGUAUAAACGAACAAAGUUUU5' ( -24.20[68.56%] )
>RC-m0015_5p	|ppa018020m|PACid:17656373	|location[1404,1426]
5'AAAACAAGGAUUGAAGACUGGUA3'
||x|||||x||||||||||o|x|
3'CUUCACCUGGUAGUUUGACCAACGGUGGGUUUAUGUUCAUAACUUCUGAUCCUUCUACGACCGUAUAUAACAGACCUUCUGGU5' ( -22.80[63.33%] )
>RC-m0016_3p	|ppa012594m|PACid:17663215	|location[504,524]
5'UUUUGGGCAAGGUAGCAUAAG3'
|o|||o|||||xo||||||||
3'GAUCGGCUGUACUAGUUGCCGGUUCUAGAACUCGUUCGGUCGUAUUCUGUGCGGAACCAACAGUAGCGGUGGAGGGU5' ( -28.10[78.49%] )
>RC-m0016_3p	|ppa003074m|PACid:17651829	|location[767,787]
5'UUUUGGGCAAGGUAGCAUAAG3'
||o|||||x||x||||||x||
3'GGGAUGUAGUGAAGGUCAAAGGAAGAAAAAAAGACCCGCUCAAUCGUAAUCAACGGUUCGUUGAGGUGACAGGGUUCGUGC5' ( -21.90[60.16%] )
>RC-m0016_3p	|ppa004781m|PACid:17662693	|location[1219,1239]
5'UUUUGGGCAAGGUAGCAUAAG3'
|||||||||||x|xx|||||x
3'GUUGGGACUGUAGUUGCUCUCGUUCCUAUCAAAACCCGUUCGAGAGUAUUAAUAGUGUAGAUCCAUUGGUAGACUCUUGAA5' ( -23.10[63.99%] )
>RC-m0016_3p	|ppa015790m|PACid:17656910	|location[610,630]
5'UUUUGGGCAAGGUAGCAUAAG3'
||o|||||x||x||||||x||
3'GGGAUGUAGUGAAGGUCAAAGGAAGAAAAAAAGACCCGCUCAAUCGUAAUCAACGGUUCGUUGAGGUGCAUGUAUCAAGUG5' ( -21.90[60.16%] )
>RC-m0018_3p	|ppa012437m|PACid:17648072	|location[161,180]
5'AAAGACUAAAAUACCCUUGA3'
|||||||||||xxx|||||x
3'ACGCCUCUAACUUCUCCUCCACCUCCACCUUUUCUGAUUUUCCAGGAACAAUGACGCCAACCCUCGUAGCAGAUCCUCGU5' ( -17.40[60.84%] )
>RC-m0018_3p	|ppa013211m|PACid:17655878	|location[447,466]
5'AAAGACUAAAAUACCCUUGA3'
|x|||||x|||||||||oo|
3'UGAAAUUUUUGAUCGGUUUUUGAGUCAAUUUAUCUGAGUUUAUGGGAGUUAUAAAUUUGAGUGUAUUUUGGAUUCUUCCU5' ( -21.30[74.48%] )
>RC-m0018_3p	|ppa017834m|PACid:17641445	|location[71,90]
5'AAAGACUAAAAUACCCUUGA3'
||||||||||||||||||o|
3'GAAGUGGUGGGAGUGUUUGGAUCUUUUAUCUUUCUGAUUUUAUGGGAAUUUUAUAUACCUUUUAACUUACCACAAUUUCA5' ( -26.30[92.28%] )
>RC-m0022_5p	|ppa004445m|PACid:17640690	|location[1200,1220]
5'ACACUUACUUGAAAAACUCGG3'
|||||xx|||||x||x|||||
3'GUCUCUACCGAUCGUUACCUCAAUUUAGUCUGUGACGGAACUGUUGGAGCCCUAGUGAACAUUUAUCGAACGAGUUAGGCC5' ( -20.20[62.54%] )
>RC-m0023_3p	|ppa006634m|PACid:17655522	|location[1241,1261]
5'CAGCCAAGGAUGACUUGCCGG3'
x|||||||o||||x||||||x
3'GGUAAGUAGAUACGGUGUUCGUGUUCUUGUUUCGGUUCUUACUUAACGGCGGACCGUUUGUGUAACGGUUUCUAUAUUGGU5' ( -30.00[68.65%] )
>RC-m0023_3p	|ppa012173m|PACid:17666161	|location[698,718]
5'CAGCCAAGGAUGACUUGCCGG3'
x|||||||o||||x|||||x|
3'GUGUUGUGGGUUAUUAAUGUUUUCAUUGGUUUCGGUUCUUACUAAACGGACUAUAUCUGUAACGUGUCGUCCCAAAGUGGG5' ( -28.00[64.22%] )
>RC-m0024_5p	|ppa003405m|PACid:17646705	|location[309,329]
5'ACGGAGCCAUGCGUUGAGCAC3'
||||||||||||xo|o||x||
3'UUUCGAAAACCAGGUUUGCGUUCAAAUAUGUGCCUCGGUACGAGAUUCUUGGUUAGUAUAUUACGUUUCUUCUCUCCGGCU5' ( -29.60[67.73%] )
>RC-m0025_3p	|ppa020705m|PACid:17652142	|location[114,134]
5'UCAUCCCGUUACUGUUUGGCA3'
x||||||ox||||x|||||||
3'UUUUUGGACAGAACUACCGCGAACAUUUUCUGUAGGGUUAUGAAAAACCGUAGAAAAAGUAUGAACAGAGAGGUCUUUCCC5' ( -24.90[64.84%] )
>RC-m0026_5p	|ppa013258m|PACid:17651150	|location[417,438]
5'GGAUUGGGUGGGUUUGGUAAGA3'
||||||||||||||||||||||
3'CUUUCCCUCUUUCUCCAACUCCUUCAAAACCCUAACCCACCCAAACCAUUCUUUUGAACUAGUAUAUAGAGUUACUUGAGCA5' ( -42.00[100.00%] )
>RC-m0026_5p	|ppa010184m|PACid:17647274	|location[64,85]
5'GGAUUGGGUGGGUUUGGUAAGA3'
||||||x|x||o||||||x|||
3'AUGUCUAUUUAAUCCCAAUCCCAAAACUCCCCUAACACCCCUAAACCACUCUUUCCCCUUUUUCAAUACCCAAAACAGAAAC5' ( -26.90[64.05%] )
>RC-m0026_5p	|ppa003986m|PACid:17658537	|location[265,286]
5'GGAUUGGGUGGGUUUGGUAAGA3'
|||||||x|||||||||oxx||
3'AUCGACCAACAACUAAGCUUGAAACUGUAGCCUAACCGACCCAAACCGCGCUUGCCUUGCCUUGAGGCUCCUUCGUAGACCU5' ( -33.40[77.86%] )
>RC-m0027_3p	|ppb024266m|PACid:17667129	|location[575,596]
5'UUUCCGAAACCUCCCAUUCCAA3'
||o||x||||||||x|||||x|
3'AGUAACAUGUCGUUAAACCGGUCACACCAGAAGGGGUUUGGAGGUUAAGGGUGAUAACCUUACUGUCUUUGUAAGAAUAACA5' ( -27.60[70.05%] )
>RC-m0027_3p	|ppa014805m|PACid:17654682	|location[1631,1652]
5'UUUCCGAAACCUCCCAUUCCAA3'
|||||||||||x||x|ox||||
3'CAUGGUAGACGGUUGUGGGGUUCUAUGUGAAAAGGCUUUGGUGGUUGUGGUUAGUGACGGAAGAGUAGUUUCAAAACACAAC5' ( -24.70[62.53%] )
>RC-m0027_3p	|ppa001010m|PACid:17646217	|location[1975,1996]
5'UUUCCGAAACCUCCCAUUCCAA3'
||||||x||||o||xx||||||
3'AAUGGUAAUCGUUCAUGUUGAGACAUUUGUAAAGGCCUUGGGGGAAAAGGUUAAUCUAAGAGAACGCAUUACCUUAGUUCUU5' ( -25.60[65.14%] )
>RC-m0027_3p	|ppa002873m|PACid:17646454	|location[946,967]
5'UUUCCGAAACCUCCCAUUCCAA3'
|||||||||||x|||x|x||||
3'CAUGGUAGAGCCUCUGUAGGAAACAUCUGUAAAGGCUUUGGUGGGAACGGUUGGUUCAAAAACGAUGACUUCAACACACAAC5' ( -26.50[67.60%] )
>RC-m0027_3p	|ppa005870m|PACid:17662402	|location[1988,2009]
5'UUUCCGAAACCUCCCAUUCCAA3'
|||||||x|||||||||||xx|
3'UCACUAUAAUACUUUACUCUUAGAUUUAAGAAAGGCUAUGGAGGGUAAGACUACUCCACCAAAACGAAUCACGAUUGAUUAC5' ( -30.90[78.23%] )
>RC-m0027_3p	|ppa016819m|PACid:17665151	|location[635,656]
5'UUUCCGAAACCUCCCAUUCCAA3'
|||||x||x||||||||o||x|
3'AGUAAUAUCUGAUUGACCCGUUUCCGUCAAAAAGGAUUAGGAGGGUAGGGGUGUUACCCCUAGUGUUUACCCGAGAAGGGAA5' ( -27.90[70.81%] )
>RC-m0027_3p	|ppa1027175m|PACid:17654226	|location[542,563]
5'UUUCCGAAACCUCCCAUUCCAA3'
||x||||x|||||||||||||x
3'ACACGUGGUUGGACAAAGUGGUACCAACAAAACGGCUGUGGAGGGUAAGGUAUCUGGGGUUAGUGUCACUGGAAUAGUAGAA5' ( -32.10[81.47%] )
>RC-m0027_3p	|ppa016435m|PACid:17668357	|location[2155,2176]
5'UUUCCGAAACCUCCCAUUCCAA3'
||||x||||||x|||x||||||
3'CUAUAUUUAGUCUCUCAAAACUCUUUACUCAAAGUCUUUGGUGGGGAAGGUUUCUCAAGUACGACUUUAGCUACGUGGUAUC5' ( -24.50[62.66%] )
>RC-m0027_3p	|ppa019519m|PACid:17661868	|location[1729,1750]
5'UUUCCGAAACCUCCCAUUCCAA3'
||||x||||||x|||x||||||
3'UAAGAUUAAACCUCUCAAAACUCUUUACUCAAAGACUUUGGUGGGGAAGGUUUCUCAAGUACGACUUUAGUUACAGUAUGUC5' ( -24.50[62.66%] )
>RC-m0027_3p	|ppa025207m|PACid:17668203	|location[2155,2176]
5'UUUCCGAAACCUCCCAUUCCAA3'
||||x||||||x|||x||||||
3'CUAUAUUUAGUCUCUCAAAACUCUUUACUCAAAGUCUUUGGUGGGGAAGGUUUCUCAAGUACGACUUUAGCUACGUGGUAUC5' ( -24.50[62.66%] )
>RC-m0027_3p	|ppa026334m|PACid:17660376	|location[560,581]
5'UUUCCGAAACCUCCCAUUCCAA3'
||o||ox||||||||||||||x
3'GCUAACAAGUUCCAAAAAUGAUCACAUCAAAAGGGUCUUGGAGGGUAAGGUAUUUGUCGUUAGGAACACUAAGGAAAUAGUC5' ( -32.90[83.50%] )
>RC-m0027_3p	|ppb000367m|PACid:17653109	|location[1729,1750]
5'UUUCCGAAACCUCCCAUUCCAA3'
||||x||||||x|||x||||||
3'UAAGAUUAAACCUCUCAAAACUCUUUACUCAAAGACUUUGGUGGGGAAGGUUUCUCAAGUACGACUUUAGUUACAGUAUGUC5' ( -24.50[62.66%] )
>RC-m0027_3p	|ppa017081m|PACid:17654789	|location[234,255]
5'UUUCCGAAACCUCCCAUUCCAA3'
||||x|||||||||||x||x|x
3'GUUCUUGGAGAGUAACAGGAGAAGUCUUGGAAAGUCUUUGGAGGGUUAGUUAAGAAAAGAAAGAACUUUUGGUUCUAAACCA5' ( -24.90[63.04%] )
>RC-m0027_3p	|ppa000373m|PACid:17640939	|location[1200,1221]
5'UUUCCGAAACCUCCCAUUCCAA3'
||o||x||x|||||||||||x|
3'ACUACUAUAUAUCUAAAUCGGUUUCAACAAAAGGGGUUGGGAGGGUAAGGGUGUUACCCGUAGUGGCUCUCUAUCAAGAGAA5' ( -29.90[75.89%] )
>RC-m0027_3p	|ppa001164m|PACid:17657318	|location[1619,1640]
5'UUUCCGAAACCUCCCAUUCCAA3'
||x||o||||||||||oo||||
3'CGAGGUGGUAGCUAAAGUGGGAACAUUUGGAACGGUUUUGGAGGGUGGGGUUCCUCAUCGCGGAGUAGUUUCAAAAACCACC5' ( -32.20[81.93%] )
>RC-m0027_3p	|ppa001409m|PACid:17643330	|location[1828,1849]
5'UUUCCGAAACCUCCCAUUCCAA3'
||o||o|||||x||x|||||||
3'CAAGGUAGUAAAUUCUGAGGAAACAUAUGGAAGGGUUUUGGUGGUUAAGGUUAUUGGGUUGAGAGUAGUUUCAAUAAACAUC5' ( -26.20[66.33%] )
>RC-m0027_3p	|ppa003078m|PACid:17659604	|location[866,887]
5'UUUCCGAAACCUCCCAUUCCAA3'
|||||o|||||||||xx|||x|
3'CACAACAGUCUAUCGUGAGGAAAUAUCUGAAAAGGUUUUGGAGGGACAGGAUCUUGUAAAAAGAGUGACUUCAACAGACAAC5' ( -30.10[76.59%] )
>RC-m0027_3p	|ppa019044m|PACid:17655472	|location[923,944]
5'UUUCCGAAACCUCCCAUUCCAA3'
||o||o||x||||||||x||||
3'CUGGGUAGAAGAUUAUAGGGGAACAUUUGUAAGGGUUUAGGAGGGUAUGGUUAUUACAAGAGGGAACUCUUUAAGGGACAUC5' ( -28.10[71.50%] )
>RC-m0027_3p	|ppa002803m|PACid:17645048	|location[174,195]
5'UUUCCGAAACCUCCCAUUCCAA3'
||||||||x|||x|||o|||x|
3'AUGAAAGCUUAGAAAACGAAGUUCGUUGUCAAAGGCUUAGGAAGGUGAGGCUCUUUGAUCUCCCUUGAACACUUCACGUUUC5' ( -27.40[70.26%] )
>RC-m0027_3p	|ppa020021m|PACid:17661193	|location[455,476]
5'UUUCCGAAACCUCCCAUUCCAA3'
|||||||x||||||x||x||||
3'AACAGCAUCUGAAACGAACGUUCUCACCAGAAAGGCUCUGGAGGUUACGGUUGGUUACUUGACUGACUCGCAGAUCUACGAU5' ( -25.00[63.45%] )
>RC-m0027_3p	|ppa022038m|PACid:17667143	|location[2494,2515]
5'UUUCCGAAACCUCCCAUUCCAA3'
||||xo||x|||x|||||||||
3'CUGUUCCCUUACUGUGUCCAAAAGGUCGAUAAAGCUUUGGGAAGGUAAGGUUGUUUAAGCCGUAUAGUAUUUCGAGUUCAAC5' ( -24.20[61.73%] )
>RC-m0027_3p	|ppa1027204m|PACid:17669052	|location[554,575]
5'UUUCCGAAACCUCCCAUUCCAA3'
||x||||x|||||||||x||x|
3'ACUAACAUGUUAAAAAACCGUUCUCAUCAAAACGGCUCUGGAGGGUACGGGUGUUAUCUUUGGUGUGCCGCUGCUCCGAGGU5' ( -27.70[70.30%] )
>RC-m0028_3p	|ppa015313m|PACid:17653536	|location[671,692]
5'UUGCCUAUUCCUCCCAUGCCAA3'
|||||x|||||x|||||x|||x
3'ACCAAUAUUCGUCAGAACCGUUACCACCAGAACGGUUAAGGUGGGUAGGGUAUCUGAUGUCGAUGAGGUUGUAGUGAACUAG5' ( -29.60[69.16%] )
>RC-m0028_3p	|ppa025931m|PACid:17641814	|location[665,686]
5'UUGCCUAUUCCUCCCAUGCCAA3'
|||||x|||||x|||||x|||x
3'ACCAAUAUUCGUCAGAACCGUUACCACCAGAACGGUUAAGGUGGGUAGGGUAUCUGAUGUCGAUGAGGUUGUAGUGAACUAG5' ( -29.60[69.16%] )
>RC-m0028_3p	|ppa017433m|PACid:17649403	|location[668,689]
5'UUGCCUAUUCCUCCCAUGCCAA3'
||x||||||||x|x|||||||x
3'CAUAAUAUUUGUCUGAAACGUUACCAACAGAAGGGAUAAGGUGAGUACGGUAUUUAAUGUUCAUACGGCUGUAGUAGACUAG5' ( -27.20[63.55%] )
>RC-m0028_3p	|ppa022023m|PACid:17662758	|location[491,512]
5'UUGCCUAUUCCUCCCAUGCCAA3'
||x||||||||x|x|||||||x
3'CAUAAUAUUUGUAUGAAACGUUACCAACAGAAGGGAUAAGGUGAGUACGGUAUUUAAUGUUCAUACGGCUGUAGUAGACUAG5' ( -27.20[63.55%] )
>RC-m0028_3p	|ppa026003m|PACid:17641205	|location[674,695]
5'UUGCCUAUUCCUCCCAUGCCAA3'
||x||||||||x|x|||||||x
3'CAUAAUACUUCUCUGAAACGUUACCAACAGAAGGGAUAAGGUGAGUACGGUAUUUAAUGUUCAUAUGGCUGUAGUAGACUAG5' ( -27.20[63.55%] )
>RC-m0028_3p	|ppb014730m|PACid:17641227	|location[617,638]
5'UUGCCUAUUCCUCCCAUGCCAA3'
||||||||o|||x||x|o||||
3'AACAACUUAUAGUUAACCGUUUCACAACAAAACGGAUAGGGAAGGGAUGGUUGUUACGGAUGACGGAACUUGGCUAGUACUG5' ( -31.60[73.83%] )
>RC-m0028_3p	|ppa020719m|PACid:17658044	|location[227,248]
5'UUGCCUAUUCCUCCCAUGCCAA3'
|||||||oo||x|||||x||||
3'AGUAACAUUUCGUCAGCCCGUUCCCAACAGAACGGAUGGGGCGGGUAAGGUUGUUACCACUCCUGUCUGUGUAGUAGGAACG5' ( -30.70[71.73%] )
>RC-m0028_3p	|ppa000953m|PACid:17660995	|location[590,611]
5'UUGCCUAUUCCUCCCAUGCCAA3'
||x||o|||||||||||x|||x
3'AGUAGUAUCUGAACGAACCGGUUCCACCAGAAGGGGUAAGGAGGGUAAGGUCGGUUGCUUUGAUGAAGCGCCGGUCUUGACG5' ( -31.80[74.30%] )
>RC-m0028_3p	|ppa026111m|PACid:17662995	|location[509,530]
5'UUGCCUAUUCCUCCCAUGCCAA3'
||x|||||x||||||||x|||x
3'AGUAGUAUUUGAAAGAAGUGGUUCCACCAGAAGGGAUACGGAGGGUAAGGUCACUGACUUUGAUGAAGUGCAGGUCUCGGUG5' ( -27.10[63.17%] )
>RC-m0028_3p	|ppa019385m|PACid:17654769	|location[620,641]
5'UUGCCUAUUCCUCCCAUGCCAA3'
|||||x|||||x|||||x|||x
3'ACCAAUAUUCGUCAGAACCGUUACCACCAGAACGGUUAAGGUGGGUAGGGUAUCUGAUGUCGAUGAGGUUGUAGUGAACUAG5' ( -29.60[69.16%] )
>RC-m0028_3p	|ppa001090m|PACid:17658188	|location[703,724]
5'UUGCCUAUUCCUCCCAUGCCAA3'
||x|||||x||o||||||||x|
3'ACUACUAUUUGGAGAAAACGUUCUCAUCAGAAAGGAUAUGGGGGGUACGGGUUAUAUCGUUAUUGACCUAGAAGUAAAACAA5' ( -31.10[72.66%] )
>RC-m0028_3p	|ppa016819m|PACid:17665151	|location[635,656]
5'UUGCCUAUUCCUCCCAUGCCAA3'
||x||||x|||||||||x||x|
3'AGUAAUAUCUGAUUGACCCGUUUCCGUCAAAAAGGAUUAGGAGGGUAGGGGUGUUACCCCUAGUGUUUACCCGAGAAGGGAA5' ( -28.70[67.06%] )
>RC-m0028_3p	|ppa021718m|PACid:17647832	|location[626,647]
5'UUGCCUAUUCCUCCCAUGCCAA3'
|||||||||||x|||||x||x|
3'ACCAAUAUUUACCGAGCCCGUUCACAACAAAACGGAUAAGGUGGGUAGGGGUUUUAAGGUUGAUACGCUUGUAGUAGACUAG5' ( -33.10[77.34%] )
>RC-m0028_3p	|ppa014763m|PACid:17662144	|location[311,332]
5'UUGCCUAUUCCUCCCAUGCCAA3'
||x||||||||x|x|||||||x
3'CUUAAUAUUUGUCUGAAACGUUACCAACAGAAGGGAUAAGGUGAGUACGGUAUUUAAUGUUCAUACGGUUGUAGUAAACUAG5' ( -27.20[63.55%] )
>RC-m0028_3p	|ppa018842m|PACid:17663628	|location[638,659]
5'UUGCCUAUUCCUCCCAUGCCAA3'
|||||o||x||||||||x||x|
3'AGUAAUAUCCGAUCAACCCAAUUUCAACAAAACGGGUACGGAGGGUAGGGCUGUUAUCCCUACUAUUCCUUGGGGAAGGGAA5' ( -32.90[76.87%] )
>RC-m0028_3p	|ppa021551m|PACid:17643473	|location[638,659]
5'UUGCCUAUUCCUCCCAUGCCAA3'
|||||o||x||||||||x||x|
3'AGUAAUAUCCGAUCAACCCAAUUUCAACAAAACGGGUACGGAGGGUAGGGCUGUUAUCCCUACUAUUCCUUGGGGAAGGGAA5' ( -32.90[76.87%] )
>RC-m0028_3p	|ppa023828m|PACid:17649287	|location[377,398]
5'UUGCCUAUUCCUCCCAUGCCAA3'
||x||||||||x|x|||||||x
3'CUUAAUAUUUGUUUGAAACGUUACCAACAGAAGGGAUAAGGUGAGUACGGUAUUUAAUGUUCAUACGGUUGUAGUAGACUAG5' ( -27.20[63.55%] )
>RC-m0028_3p	|ppa001182m|PACid:17644336	|location[554,575]
5'UUGCCUAUUCCUCCCAUGCCAA3'
||o||||ox||||||||||||x
3'AAUAACAACUAGAACCAGUUUUCCCAUCAGAAUGGAUGUGGAGGGUACGGUAUGUUCGGUUAUUAAGGGUGAACGAGAAGAA5' ( -36.70[85.75%] )
>RC-m0028_3p	|ppa015899m|PACid:17667665	|location[581,602]
5'UUGCCUAUUCCUCCCAUGCCAA3'
|||||x|||||||||||x||x|
3'GAGAAUAUCCGUUCAACCCGUUCUCAACAGAACGGUUAAGGAGGGUAGGGAUAUUAUCCCUACUGUUCCGUCCAACGGGGAG5' ( -33.00[76.92%] )
>RC-m0028_3p	|ppa016447m|PACid:17664281	|location[635,656]
5'UUGCCUAUUCCUCCCAUGCCAA3'
||x||o|||||||||||x||x|
3'AGUAAUAUCCGAUCAACACGUUCUCAACAGAAAGGGUAAGGAGGGUAGGGGUGUUACCCCUAUUGUUCCCCUGGGCAAUGUU5' ( -31.60[73.83%] )
>RC-m0028_3p	|ppa017700m|PACid:17654457	|location[419,440]
5'UUGCCUAUUCCUCCCAUGCCAA3'
|||||x||o||||||||x||x|
3'GUAUUGGGUUACUCAAACCGUUCUCAACAGAACGGUUAGGGAGGGUAGGGAUAUUAUCCCUACUGUUCCGUCCAGCGGGGAG5' ( -32.50[75.76%] )
>RC-m0028_3p	|ppa020323m|PACid:17666995	|location[614,635]
5'UUGCCUAUUCCUCCCAUGCCAA3'
|||||x||o||||||||x||x|
3'AGUAAUAUCCGUUCAACCCGUUCUCAACAGAACGGUUAGGGAGGGUAGGGAUAUUAUCCCUACUGUUCCGUCCAGCGGGGAG5' ( -32.50[75.76%] )
>RC-m0028_3p	|ppa021014m|PACid:17665584	|location[599,620]
5'UUGCCUAUUCCUCCCAUGCCAA3'
||o||x|||||||||||x||x|
3'AGUAAUAUACGUUCAACCCGUUCUCAACAGAAUGGUUAAGGAGGGUAGGGAUGUUAACCCUACUGUUCCUUCAAACCGGAAC5' ( -31.00[72.43%] )
>RC-m0028_3p	|ppa022649m|PACid:17656454	|location[617,638]
5'UUGCCUAUUCCUCCCAUGCCAA3'
|||||x|||||||||||x||x|
3'AGCAAUAUCUGUUCAACCCGUUCUCAACAGAACGGUUAAGGAGGGUAGGGAUAUUAUCCCUACUGUUCCGUCCAACGGGGAG5' ( -33.00[76.92%] )
>RC-m0028_3p	|ppa025816m|PACid:17650752	|location[455,476]
5'UUGCCUAUUCCUCCCAUGCCAA3'
|||||o|||||||||||x||x|
3'AGUAAUAUCCGAUCAACCCGUUCUCAACAGAACGGGUAAGGAGGGUAGGGAUUUUAUCUCUGCUGUUCUCCUGGGGAGAGGA5' ( -37.20[86.92%] )
>RC-m0028_3p	|ppa017946m|PACid:17669245	|location[317,338]
5'UUGCCUAUUCCUCCCAUGCCAA3'
||||||xx|||||||||x||x|
3'AACCACUUUCGGGAACGUUGAUCUCAACAGAACGGACUAGGAGGGUAGGGGUUGUGCCUCUGUUAUCAAACCGCAACGAGAA5' ( -32.30[75.47%] )
>RC-m0028_3p	|ppa024822m|PACid:17655911	|location[605,626]
5'UUGCCUAUUCCUCCCAUGCCAA3'
|||||x||o|||||||||||x|
3'AACAACAUAUGCUCGACUCGUUCUCACCAGAACGGCUAGGGAGGGUACGGGUGUUACCCUUGGUGUGAAUAAAAUAAAAGUC5' ( -36.80[85.98%] )
>RC-m0028_3p	|ppa016254m|PACid:17668240	|location[449,470]
5'UUGCCUAUUCCUCCCAUGCCAA3'
|||||x||||||||x||o||||
3'AGCAAUAUACGGUUGACUCAUUCUCAACAGAACGGUUAAGGAGGUUAUGGUUAAUAACCUUAUGUUCAACGUAUAGGUAGGA5' ( -29.90[69.70%] )
>RC-m0028_3p	|ppa018717m|PACid:17664914	|location[497,518]
5'UUGCCUAUUCCUCCCAUGCCAA3'
||o||x||||||||x|||||x|
3'AGUAAUAUACUGUAAACUCGUUCUCACCAGAAUGGUUAAGGAGGCUACGGCUACUAACCUUACGUACAGCGUAUACUUGUUG5' ( -29.10[67.83%] )
>RC-m0028_3p	|ppa021797m|PACid:17667495	|location[587,608]
5'UUGCCUAUUCCUCCCAUGCCAA3'
|||||||xo||||||||x|||x
3'ACUACCAUUUGGAAGGAUCGGUCUCACCAGAACGGAUUGGGAGGGUAAGGUGUAUAACUUUGGUGAGCUGACGGCCUCAAAG5' ( -31.60[73.83%] )
>RC-m0028_3p	|ppa022038m|PACid:17667143	|location[581,602]
5'UUGCCUAUUCCUCCCAUGCCAA3'
||x||x||||||||||||||x|
3'AGCAACAUGUACUGAACACGUUCUCGACAGAAAGGUUAAGGAGGGUACGGAUGUUCACGCUAGUGUGCUUGAACAACAACGA5' ( -32.10[75.00%] )
>RC-m0028_3p	|ppa022091m|PACid:17654712	|location[674,695]
5'UUGCCUAUUCCUCCCAUGCCAA3'
||o||||||||o||x|||||x|
3'GAGAGCAUUUGUUGAGACCGUUGUCAACAGAAUGGAUAAGGGGGUUACGGGUUUUAGGGAUACCGUGUUUGAAAUACGUCGG5' ( -32.40[75.70%] )
>RC-m0028_3p	|ppa022198m|PACid:17647367	|location[374,395]
5'UUGCCUAUUCCUCCCAUGCCAA3'
||o||x||||||||x||o||||
3'AGUAAUAUAGGGUUAACUCGUUCUCACCAGAAUGGUUAAGGAGGUUAUGGUUUAUAACUUUAUGUACAACGUAUAGGAAGGA5' ( -27.80[64.95%] )
>RC-m0028_3p	|ppa1027179m|PACid:17658650	|location[686,707]
5'UUGCCUAUUCCUCCCAUGCCAA3'
||o||||||||o||x|||||x|
3'GAGAGCAUUUGUUGAGAACGUUGUCAACAGAAUGGAUAAGGGGGUUACGGGUUUUAGGGAUACUGUGUUUGAAAUACGUCGG5' ( -32.40[75.70%] )
>RC-m0028_3p	|ppb022444m|PACid:17664258	|location[1139,1160]
5'UUGCCUAUUCCUCCCAUGCCAA3'
||||||||x||x|||||x|||x
3'CACUUUUGUUGAAGAAGGUGGUUCCAACAUAACGGAUAUGGCGGGUAAGGUGUAUAAUGUUGGCCUAACUAAACUAGUAGAC5' ( -27.00[63.38%] )
>RC-m0028_3p	|ppa001015m|PACid:17660055	|location[1305,1326]
5'UUGCCUAUUCCUCCCAUGCCAA3'
|||||x|x|||||||||o||||
3'AACAGUAUAUGAAAGAACCGUUCUCACCAGAACGGUUCAGGAGGGUAUGGUUCGUGACUAUAGUGAAGUGCCGCAAGUACAA5' ( -33.30[77.99%] )
>RC-m0028_3p	|ppa001315m|PACid:17643516	|location[582,603]
5'UUGCCUAUUCCUCCCAUGCCAA3'
|||||||||||||||||x||xx
3'CAUAGUUUGUGGUGAACACGUUCUCAACAGAACGGAUAAGGAGGGUAGGGGGUAUAGGGAUUCGAUACUUGUAGAAAUGUGU5' ( -37.30[87.15%] )
>RC-m0028_3p	|ppa015920m|PACid:17642956	|location[554,575]
5'UUGCCUAUUCCUCCCAUGCCAA3'
|||||x|x|||||||||o||||
3'GACAGUAUUUGAAAGAACCGUUCUCACCAGAACGGUUCAGGAGGGUAUGGUUCGUGGUUUUAGUGAUGUGCCGCAAGUACAA5' ( -33.30[77.99%] )
>RC-m0028_3p	|ppa016138m|PACid:17658303	|location[575,596]
5'UUGCCUAUUCCUCCCAUGCCAA3'
|||||||oo||x|||||x||||
3'AGUAACAUUUCGUCAGCCCGUUCCCAACAGAACGGAUGGGGCGGGUAAGGUUGUUACCACUCCUGUCUGUGUAGUAGGAACG5' ( -30.70[71.73%] )
>RC-m0028_3p	|ppa021541m|PACid:17662924	|location[575,596]
5'UUGCCUAUUCCUCCCAUGCCAA3'
|||||x||o||x|||||x||||
3'AGUAAUAUUUCGUCAGCCCGUUCCCAACAGAACGGUUAGGGUGGGUAAGGUUGUUACCACUCCUGUCUGUGUAGUAGGAAUG5' ( -27.00[63.08%] )
>RC-m0028_3p	|ppa023276m|PACid:17657302	|location[674,695]
5'UUGCCUAUUCCUCCCAUGCCAA3'
||x||x|||||||||||x|||x
3'GCCAAUAUUCGUCGAAACCGUUACCACCAGAAAGGUUAAGGAGGGUAGGGUAUCUAGUGUCGAUGUGGUUGUCGUAAACUAG5' ( -28.40[66.36%] )
>RC-m0029_5p	|ppa003578m|PACid:17653567	|location[214,234]
5'UUUGGAAUGAGCGUGUUGGAA3'
||x||||x||||o|||||||x
3'GAAAAGUUAACUUAGUUUCUCGAAUACCCUAACCCUUUCUCGUACAACCUGACUUUUGGACGGUUUCAGUAUCUGUAACCG5' ( -26.40[73.54%] )
>RC-m0029_5p	|ppa000538m|PACid:17651196	|location[2040,2060]
5'UUUGGAAUGAGCGUGUUGGAA3'
|||o||x|o|||o||||||||
3'CAGUUCAACAAUAUUCUUUUUAGUUUCGACAAAUCUGAUUCGUACAACCUUUUACGACUACCCUACCUGGGACUCUCUACC5' ( -25.70[71.99%] )
>RC-m0029_5p	|ppa013273m|PACid:17658595	|location[5,25]
5'UUUGGAAUGAGCGUGUUGGAA3'
|||x||||||||||x||||xx
3'CUAAACAUCAUUAAUUCUCCUUCUCUCUGCAAAACUUACUCGCAGAACCACUUCA5' ( -24.90[69.75%] )
>RC-m0029_5p	|ppa017059m|PACid:17649718	|location[380,400]
5'UUUGGAAUGAGCGUGUUGGAA3'
|||||||||||x||||||oxx
3'GACUCUAAAGAUGACGAUAGAAGUAAGCGUAAACCUUACUCUCACAACUACUAGGAAACGAAAAAGGUACUUAUACGAGCA5' ( -25.80[72.07%] )
>RC-m0030_3p	|ppa026152m|PACid:17662938	|location[43,63]
5'GAAAUUUCGUCGGGAAAGGUU3'
o||||x|||||||||x||||o
3'AUUAACGUUUUAAUCUGCACGUGUUUGAUUUUUUACAGCAGCCCUCUCCAGAUUAGGCCGUUUAUAAACAGCUGUAUUUGG5' ( -25.80[73.50%] )
>RC-m0030_3p	|ppa016026m|PACid:17667011	|location[450,470]
5'GAAAUUUCGUCGGGAAAGGUU3'
|||||||||||||||x|||||
3'CAGCCGUAUCCAGAUACGUGGACACGGCUGCUUUAAAGCAGCCCUCUCCAACACAAGAAAAAAAAAAACAUGCACAUAUUA5' ( -32.10[90.17%] )
>RC-m0030_3p	|ppa016026m|PACid:17667011	|location[506,526]
5'GAAAUUUCGUCGGGAAAGGUU3'
|||||||||||||x|x||o||
3'GCUUUAAACGGCCUAAUCCAAAGGGGGCUGCUUUAAAGCAGCCGUAUCUAAAAAAGCAGCCGUAUCCAGAUACGUGGACAC5' ( -24.80[69.66%] )
>RC-m0030_3p	|ppa016026m|PACid:17667011	|location[565,585]
5'GAAAUUUCGUCGGGAAAGGUU3'
o||||||||||||x|x||||o
3'UGUAACUGGUUAUAACAAGUGAGAGCGCUGUUUUAAAGCAGCCGUAUCCAGAUACGGCUGCUUUAAACGGCCUAAUCCAAA5' ( -25.20[70.79%] )
>RC-m0030_3p	|ppa006789m|PACid:17662247	|location[244,264]
5'GAAAUUUCGUCGGGAAAGGUU3'
||x|||||x||||||x||o||
3'UUUAUUGAAGACUUCUUGGGAUUGCCGCGGCUAUAAAGGAGCCCUCUCUAACAGGUGUUACCAAUGUGCUAUACUUAGGAA5' ( -22.40[62.92%] )
>RC-m0030_3p	|ppa021887m|PACid:17666705	|location[200,220]
5'GAAAUUUCGUCGGGAAAGGUU3'
ox|||oo||||||||||||||
3'CCUUUCUAACCACCCUUCAAGACCCCUCGGUCUUAGGGCAGCCCUUUCCAAACGCACUCAGCUACUCGUGGAAAUGAGCAU5' ( -29.80[83.71%] )
>RC-m0030_3p	|ppb017944m|PACid:17640754	|location[76,96]
5'GAAAUUUCGUCGGGAAAGGUU3'
|||||||||||||x||||o|o
3'UGGGUGUUGGGAUAUUUCCAAAGAGGGCUGCUUUAAAGCAGCCGUUUCUAGAUACGGCUGUUUUAAACGGCCUAAUCCAAA5' ( -28.70[80.62%] )
>RC-m0031_3p	|ppa015660m|PACid:17657187	|location[1915,1935]
5'CAUUAGAGCGGUGGUACACAA3'
||||||||x||||x||x|||x
3'UAAACUACUUUCUAGUUACGAGAAAUGGUCGUAAUCUCACCACAAUAUGUGCUCAAGAAGGGGAAAAUUACAGUCGUGCCA5' ( -24.20[64.36%] )
>RC-m0032_5p	|ppa021946m|PACid:17654833	|location[117,139]
5'UGUAAUCCAAGAGAUCAGGACUG3'
|o|x|||||||||||||o||||x
3'UAAAAGAACACUCGAGAAGUUAAACGAGUAAUACUAGGUUCUCUAGUUCUGAAAAUCUUAAUCUUAGUCUUAGAUCCACAUAU5' ( -31.20[74.64%] )
>RC-m0032_5p	|ppa016052m|PACid:17662013	|location[1218,1240]
5'UGUAAUCCAAGAGAUCAGGACUG3'
||x||||||||||||||x||||x
3'GUAAUGUUAACGUGUUUUGGUUAGCCAGGGACUUUAGGUUCUCUAGUACUGAAAAGAAGGUCUUUGGUCUCACAGCAUUAUAU5' ( -28.60[68.42%] )
>RC-m0032_5p	|ppa023454m|PACid:17658543	|location[900,922]
5'UGUAAUCCAAGAGAUCAGGACUG3'
x||x||||||||||||x|||x||
3'GCCACUCACUGGUGUUUAGAGAACCUAAGGCCACUAGGUUCUCUAGCCCUAACUAUAUGUCAGGACUAGAGAACCUGGUGUCA5' ( -25.30[61.11%] )
>RC-m0033_3p	|ppa012829m|PACid:17654037	|location[198,220]
5'GAAGUGAGGAUGAGAUUGAGAGA3'
o||x|||||||||||x|||o|||
3'CUUAUUUUAUUUACCACCCCACUCCAACCCUUUAACUCCUACUCUUACUUUCUUAAACCCUUAUACUUUUGGCAAAGACCUUU5' ( -30.00[71.60%] )
>RC-m0036_5p	|ppa003070m|PACid:17669114	|location[194,216]
5'UGGGUUUAUAAGGAGUUGAGCUA3'
||o|||||||||||||||x||x|
3'AGGGUGUAACUUUACAAUUCCCUGGAUCGGACUCAAAUAUUCCUCAACCCGUUGAAGGGGGUAACGGUUAACCAAAACUCCAC5' ( -29.90[75.51%] )
>RC-m0036_5p	|ppa003070m|PACid:17669114	|location[424,446]
5'UGGGUUUAUAAGGAGUUGAGCUA3'
||||||||||||||||||x||x|
3'AGGGUGUAACUUUACAAUUCCCUGGAUCAGACCCAAAUAUUCCUCAACCCGUUGAAGGGGGUAACGGUUAACCAAAACCCCAC5' ( -32.90[83.08%] )
>RC-m0038_5p	|ppa014378m|PACid:17668275	|location[143,165]
5'CAUCGGAGAGCCUUUGGCCGGUA3'
||||||||||||||o|||xo||x
3'CGGUUUUAAUGGUGUAUAUCGACUGAAUUCGUAGCCUCUCGGAAGCCGUUCAAGUGGCUUAAGACUUCCAAGAGUGGAAGAGG5' ( -39.40[81.74%] )
>RC-m0038_5p	|ppa003234m|PACid:17644268	|location[1685,1707]
5'CAUCGGAGAGCCUUUGGCCGGUA3'
||||||||x||||||||||ooo|
3'AAGAGAUUUCUAGCUAACUUGACUGAAUCCGUAGCCUCCCGGAAACCGGUUGUGGGGGGCCCAGACCAGAAAAUGAGGCUAGA5' ( -36.80[76.35%] )
>RC-m0038_5p	|ppa023105m|PACid:17640814	|location[1131,1153]
5'CAUCGGAGAGCCUUUGGCCGGUA3'
||||||||x||||||||||ooo|
3'AAUCCGUAGCCUCCCGGAAACCGGUUGUGGGGAGCCCACACCAGGAAAAUGAGGCUAG5' ( -36.80[76.35%] )
>RC-m0041_3p	|ppa004145m|PACid:17648954	|location[910,931]
5'AAAUUUCGUCGGGAGAGGUUAA3'
|||||o|xx|||||||||x|||
3'UUCUGGAAAAGACCACCCUCUAGUUACGGGUUUAAGGGUGCCCUCUCCUAUUAUGGUAGUCGAAGAACAUCUUAGAGUAGUU5' ( -23.90[65.30%] )
>RC-m0041_3p	|ppa026152m|PACid:17662938	|location[41,62]
5'AAAUUUCGUCGGGAGAGGUUAA3'
||||x||||||||||||||ox|
3'UUAACGUUUUAAUCUGCACGUGUUUGAUUUUUUACAGCAGCCCUCUCCAGAUUAGGCCGUUUAUAAACAGCUGUAUUUGGAU5' ( -31.40[87.47%] )
>RC-m0041_3p	|ppa016026m|PACid:17667011	|location[448,469]
5'AAAUUUCGUCGGGAGAGGUUAA3'
||||||||||||||||||||xx
3'AGCCGUAUCCAGAUACGUGGACACGGCUGCUUUAAAGCAGCCCUCUCCAACACAAGAAAAAAAAAAACAUGCACAUAUUAUA5' ( -34.50[96.37%] )
>RC-m0041_3p	|ppa016026m|PACid:17667011	|location[563,584]
5'AAAUUUCGUCGGGAGAGGUUAA3'
||||||||||||x|x||||ox|
3'GUAACUGGUUAUAACAAGUGAGAGCGCUGUUUUAAAGCAGCCGUAUCCAGAUACGGCUGCUUUAAACGGCCUAAUCCAAAGG5' ( -24.00[66.67%] )
>RC-m0042_3p	|ppa014776m|PACid:17654130	|location[310,330]
5'AAGAUUAGAAGUAUGUAACCA3'
|xx|||||||||||||xx|||
3'UCGGGACAUUCUUCUAAACUGUGAUUUUCUUGGUAAUCUUCAUACAAAGGUUUAUCCUCUCAGUCCAAAUGUUGUAUUGAG5' ( -19.20[63.79%] )
>RC-m0044_3p	|ppa026856m|PACid:17654310	|location[1284,1304]
5'AAAUUAUGACGUUGGCUCUCC3'
|x|||||||||o||x|o||||
3'AACAAAAACUAACUCGUCUCCCUUGCUUUUUAUAAUACUGCGACGGGGAGGAGGAAACCACGGUCUUCUUGAGAGACGUUU5' ( -28.80[81.82%] )
>RC-m0049_3p	|ppa026316m|PACid:17666307	|location[667,689]
5'GACCAAUAUAUUUCGUCGCGCAA3'
|||||||x||||||||||x|||x
3'GUUAUAUAAAGCAGCGCGUUUGUAAACGCGCUGGUUACAUAAAGCAGCCCGUGUUUAAACGCCAUCUCAUCUAGCUAGUACCA5' ( -30.60[76.69%] )
>RC-m0051_3p	|ppa013658m|PACid:17662374	|location[195,215]
5'CGUUUAUUAAAUGGGUCGUGU3'
|||||xx|||||||||x||||
3'CCCAGCACAAACUCAAACUUUAAGAACUGUGCAAACUAUUUACCCAACACAUACCCAACUCCUAAGAACGGUGCAAAUUUU5' ( -21.40[66.25%] )
>RC-m0052_3p	|ppa023989m|PACid:17667692	|location[632,652]
5'ACUGAAAGUAGCUUGUGGCAA3'
x|x|||||o||||||||x|||
3'CGAGGGUUCGACACGGGUUUAACCAGAGUAGGUCUUUCGUCGAACACAGUUCCAUUCUGACAACGACGACGACGACGUUUU5' ( -24.20[66.30%] )
>RC-m0053_3p	|ppa009842m|PACid:17660452	|location[1177,1199]
5'UAUAUUUAUAUUUUCCGUCGUUA3'
||||||||||||||||||||||x
3'GCAUCAUCUUGAUAUGCUCUUACUGCAGCUAUAUAAAUAUAAAAGGCAGCAACAUUUAAUUAAAUUAUGCCGCUAUAAAACAU5' ( -28.80[97.96%] )
>RC-m0054_5p	|ppa005679m|PACid:17651251	|location[7,27]
5'GGAUUGUUUAGUGUGCGGAUU3'
|||x|||o||||o||||||||
3'ACACAAAGCAUGCAGUUGAAAAACCGCGCACCUUACAGAUCAUACGCCUAAAAAAAC5' ( -31.70[86.38%] )
>RC-m0056_3p	|ppa012437m|PACid:17648072	|location[161,180]
5'AAAGACUAAAAUACCCUUGA3'
|||||||||||xxx|||||x
3'ACGCCUCUAACUUCUCCUCCACCUCCACCUUUUCUGAUUUUCCAGGAACAAUGACGCCAACCCUCGUAGCAGAUCCUCGU5' ( -17.40[60.84%] )
>RC-m0056_3p	|ppa013211m|PACid:17655878	|location[447,466]
5'AAAGACUAAAAUACCCUUGA3'
|x|||||x|||||||||oo|
3'UGAAAUUUUUGAUCGGUUUUUGAGUCAAUUUAUCUGAGUUUAUGGGAGUUAUAAAUUUGAGUGUAUUUUGGAUUCUUCCU5' ( -21.30[74.48%] )
>RC-m0056_3p	|ppa017834m|PACid:17641445	|location[71,90]
5'AAAGACUAAAAUACCCUUGA3'
||||||||||||||||||o|
3'GAAGUGGUGGGAGUGUUUGGAUCUUUUAUCUUUCUGAUUUUAUGGGAAUUUUAUAUACCUUUUAACUUACCACAAUUUCA5' ( -26.30[92.28%] )
>RC-m0058_5p	|ppa002310m|PACid:17652002	|location[469,489]
5'GUGGAAGCUGUUGUCUGACUA3'
|||||||xx||||o||||x||
3'UGGGGACCCUUUGGUUACGGUGCUGACCACCACCUUCAUCAACGGACUAAUCCACGUGAUUCCUCGACUCAGGUCAGUGGU5' ( -25.50[65.55%] )
>RC-m0058_5p	|ppa008512m|PACid:17663441	|location[1061,1081]
5'GUGGAAGCUGUUGUCUGACUA3'
|||||||x|||||||o|||x|
3'GGAAAAUUUCGGAAUCUUUACUGAACUUGCCACCUUCCACAACAGGCUGUUGUCGGAGGCUACUCAAAUCGAGGACGCAGU5' ( -29.80[76.41%] )
>RC-m0058_5p	|ppa005241m|PACid:17669321	|location[960,980]
5'GUGGAAGCUGUUGUCUGACUA3'
o|||||||||||||xx|||x|
3'ACUUCAUUGGGUAAACCCUUAAACUAAGUUUACCUUCGACAACAUUCUGUUUAGUUCCCUGAGCUACGGGAAGUGGAAGUU5' ( -27.60[70.05%] )
>RC-m0059_3p	|ppa013658m|PACid:17662374	|location[195,215]
5'CGUUUAUUAAAUGGGUCGUGU3'
|||||xx|||||||||x||||
3'CCCAGCACAAACUCAAACUUUAAGAACUGUGCAAACUAUUUACCCAACACAUACCCAACUCCUAAGAACGGUGCAAAUUUU5' ( -21.40[66.25%] )
>RC-m0060_3p	|ppa006863m|PACid:17648415	|location[27,47]
5'ACAACUGGUUGUGGGCCCAAC3'
|||||o|x|||||||x|||x|
3'GUUGAGGCUCUGCUGAAGAAGAAGUGCCGGUGUUGGCGAACACCCAGGUGGCCGUGGUGAAGGGGCAGAGCUCGGUA5' ( -27.40[64.32%] )
>RC-m0060_3p	|ppa010829m|PACid:17646670	|location[269,289]
5'ACAACUGGUUGUGGGCCCAAC3'
|x||x|||||||||||x|x||
3'CCACCCAAAAUAACACUUAAAGACUCUUUAUAUUUACCAACACCCGUGGUGGCGUCAAGAGUUGUUAGAGACCAGGUUGAU5' ( -26.40[62.41%] )
>RC-m0060_3p	|ppa025198m|PACid:17655776	|location[815,835]
5'ACAACUGGUUGUGGGCCCAAC3'
||||x|o||||||||||x||x
3'AGUAAGGUGAGUUCAGUCCAUCUCCCGGACUGUUCAUCAACACCCGGUUUAAAUUAAGCAACUGUAAGCAUUCCAACAAUU5' ( -25.70[61.34%] )
>RC-m0061_5p	|ppa006717m|PACid:17645130	|location[125,145]
5'UGGAGUUGAGAGAAGAUUUGA3'
|||xx|||||||||x|||||x
3'AACCGUCACUAUGUCUCCACCCAGACUUAAACCCAAACUCUCUUGUAAACCAACACCGACUAUCGCUUCCUCUUCCUCUUC5' ( -23.10[65.44%] )
>RC-m0061_5p	|ppa003164m|PACid:17642450	|location[54,74]
5'UGGAGUUGAGAGAAGAUUUGA3'
||o||||xx|||||||||x||
3'GUAGACGUCAAGAACUUCGUCCAUAGGUGUACUUCAAAGCUCUUCUAACCUCGAAGCGUAAGGAUAGCCACAAACUUUACU5' ( -21.30[61.03%] )
>RC-m0063_3p	|ppa005104m|PACid:17643812	|location[36,56]
5'UGAAGGAAGAGAUAGAAGCGC3'
x|||||||||||x|||||x|x
3'UCUCCCUCCCACUAAAACCUCCUCUCCCAAUCUUCCUUCUCUCUCUUCUCUCUCCAAUCUCACUCUUCCCUGAACCCUAAC5' ( -24.40[63.05%] )
>RC-m0063_3p	|ppa011173m|PACid:17659923	|location[400,420]
5'UGAAGGAAGAGAUAGAAGCGC3'
||||o|||||||o|||x|x||
3'UUCGUCGUCGUCGUCGUCGACCUCGUCCGUACUUUCUUCUCUGUCUCCACGGCCACCCUUACAUUUGUCCGUUUCUCCCUU5' ( -26.00[68.06%] )
>RC-m0063_3p	|ppa000071m|PACid:17641456	|location[5355,5375]
5'UGAAGGAAGAGAUAGAAGCGC3'
|oxx||||||||x||||||||
3'GACCGGUGUAAAUCUACCAUGUGUUAAGGUAUAACCUUCUCUUUCUUCGCGUCUCGUUCUUGUUAGAGGGUUUUGGCAGGG5' ( -28.60[74.87%] )
>RC-m0063_3p	|ppa003608m|PACid:17659190	|location[62,82]
5'UGAAGGAAGAGAUAGAAGCGC3'
x|||||||||||x|||||x|x
3'UAGCGUGAGACGGGCACUCCGUAACAAACCCCUUCCUUCUCUCUCUUCACCACCACCACCUCGCUUCCGGUUACUAGCAAC5' ( -24.60[64.23%] )
>RC-m0063_3p	|ppa001536m|PACid:17651855	|location[1342,1362]
5'UGAAGGAAGAGAUAGAAGCGC3'
||||o||x||||||x|x||||
3'GAAUACCUAUAGCCGUCUGACUAAUAGUCAACUUUCUCCUCUAUGUCCGCGACUUAGGUGUUAGACGAGGAAGGAGAAGAG5' ( -23.60[61.14%] )
>RC-m0063_3p	|ppa006916m|PACid:17665064	|location[1292,1312]
5'UGAAGGAAGAGAUAGAAGCGC3'
||x|||x|||||x||||||o|
3'AGACUGAAGCUUUCCUCUAAUAACUGGUUGACGUCCGUCUCUCUCUUCGUGUAUAAAAUGAGAACUCCGAAAAGGGUGAAG5' ( -23.60[61.46%] )
>RC-m0063_3p	|ppa025514m|PACid:17668420	|location[4,24]
5'UGAAGGAAGAGAUAGAAGCGC3'
x||||||||||x||o||||o|
3'GUCUUUCUUGUUUUCUUGACCAUCUUCGUUCCUUCCUUCUCAAUUUUCGUGGUA5' ( -27.70[72.51%] )
>RC-m0063_3p	|ppb015337m|PACid:17644827	|location[24,44]
5'UGAAGGAAGAGAUAGAAGCGC3'
x|||||||||||xx||||x||
3'CGUUACUGUCUCUUCCCGUCCUCGUCCUUCUCUUCCUUCUCUUCCUUCUCGUCUACUCCCUCUUGUUUUCGGUA5' ( -26.10[68.50%] )
>RC-m0063_3p	|ppa003474m|PACid:17646994	|location[12,32]
5'UGAAGGAAGAGAUAGAAGCGC3'
x|||||||||||x|||||x|x
3'UCGUCACUUUUCAACAUCUCUUCUCUUUCCUCUUCCUUCUCUCUCUUCCCAUCAAAACCGUA5' ( -24.60[64.57%] )
>RC-m0063_3p	|ppa009980m|PACid:17667059	|location[177,197]
5'UGAAGGAAGAGAUAGAAGCGC3'
|||||ox||||x||||||||x
3'UCGUUUUCUCCACGCCGCUACCUCCACUUCACUUCUCUCUCGAUCUUCGCCAAGAACCUUCUUACCCUCUCUUAGAACUGC5' ( -25.90[67.62%] )
>RC-m0063_3p	|ppa013385m|PACid:17658910	|location[40,60]
5'UGAAGGAAGAGAUAGAAGCGC3'
||||||x|||||x||||||xx
3'CGAGUUCAAAUGUUUCUAUUUCUCACACACACUUCCAUCUCUCUCUUCGAAUAUUUUGCUCCCUUAUUGGCUAGCAACCGA5' ( -25.70[67.45%] )
>RC-m0063_3p	|ppa016222m|PACid:17640567	|location[721,741]
5'UGAAGGAAGAGAUAGAAGCGC3'
x|||||||||||x||||x|x|
3'CCAUCAACACCACCACCAUUAACCGUAACUUCUUCCUUCUCUCUCUUAGGGUCGACACCUUGGUCGUCGUAUUCCGACUAC5' ( -23.30[60.99%] )
>RC-m0066_5p	|ppa019704m|PACid:17642841	|location[1163,1184]
5'AAGGGCAGGUUGAAGGCCAGUA3'
||||xx||||||||xx||||||
3'GAUAAACGGCUCAUUCCGUUCCAACUUGAGGUCAUUCAGUGCUUUUGGAUUGGGCGGUAAGUAGA5' ( -28.70[64.35%] )
>RC-m0067_3p	|ppa000456m|PACid:17646694	|location[1866,1885]
5'UAUGGCAGGAAAGAAUGUGA3'
||||||||||||x||o||xx
3'AGUGACUCGUGUUUAGUAAUUAAUUUCAAAAUACCGUCCUUUGUUGCAAGAGACGUAAGUACUUACUUAAAAGAGGUGGU5' ( -25.90[75.73%] )
>RC-m0067_3p	|ppa001312m|PACid:17644921	|location[2516,2535]
5'UAUGGCAGGAAAGAAUGUGA3'
|||o|||||||||||||x|x
3'CGCAUCUGGUGUCGACAAGAUGUUCCACGUAUAUCGUCCUUUCUUACUCCGGCCAGUAGUUUGGUGGGCAGUCACCACUU5' ( -26.90[79.35%] )
>RC-m0067_3p	|ppa019143m|PACid:17654408	|location[39,58]
5'UAUGGCAGGAAAGAAUGUGA3'
||x||x||||||||||||o|
3'GUGUCGGCUUUGCUCGUUCCAGACAAUAUCAUUCCUUCCUUUCUUACAUUACCCGUUGAACCAGACCUUCCAAUGAUUUA5' ( -21.80[64.31%] )
>RC-m0067_3p	|ppa009895m|PACid:17653842	|location[49,68]
5'UAUGGCAGGAAAGAAUGUGA3'
|x||||||||||||||x|||
3'UCUCGGUUGUCGCAUGAUCGUUCCCAAUGUACACCGUCCUUUCUUAAACUAAAGAAGUCCUGGAGGUGUUUUCUUUGUAA5' ( -25.80[75.88%] )
>RC-m0067_3p	|ppa023446m|PACid:17645895	|location[78,97]
5'UAUGGCAGGAAAGAAUGUGA3'
o|x||x|||||||||||||x
3'UUUCCGACCAGAAAUGUCGGUGCAGACAAGGUUCCUUCCUUUCUUACACCGUCUCUUAAAGUAAACCAUUAGGUGAUUAG5' ( -23.20[68.04%] )
>RC-m0067_3p	|ppa009026m|PACid:17663418	|location[32,51]
5'UAUGGCAGGAAAGAAUGUGA3'
x|x||||o||||o|||||||
3'CCACCGACAUGUUCCCGACUCCUUCCUCCUUUCCCGUUCUUUUUUACACUGGGUCUACCGGUUUACCCUUCAUUUUCGGU5' ( -24.80[73.16%] )
>RC-m0067_3p	|ppa023099m|PACid:17648088	|location[960,979]
5'UAUGGCAGGAAAGAAUGUGA3'
|x|||x||||||||||o|o|
3'GUGCUUAAGAGACUUGAACCAAAAAUAUAAAGACCUUCCUUUCUUAUAUUUAGGAAAAAUUUUGCCAAUUGUUCUAAUUC5' ( -21.30[62.46%] )
>RC-m0067_3p	|ppa020157m|PACid:17654796	|location[1705,1724]
5'UAUGGCAGGAAAGAAUGUGA3'
x|||x||||||||||x||o|
3'GAAGAUGAAGAAGAAGAAGGUUAGUUUUGUUUACGGUCCUUUCUUUCAUUUUCACAAGGGUUCUAUCCCUUUUACUAAUU5' ( -21.20[62.54%] )
>RC-m0067_3p	|ppa002028m|PACid:17648750	|location[52,71]
5'UAUGGCAGGAAAGAAUGUGA3'
x|x||||o||||||||||x|
3'UCUACUCAUCUCGGUCACUCAAAAGUGAAACUCCCGUUCUUUCUUACAGUAUGUUUCUCUUUUCGUAGUCUACAACGUAC5' ( -23.80[69.59%] )
>RC-m0067_3p	|ppa004355m|PACid:17656844	|location[744,763]
5'UAUGGCAGGAAAGAAUGUGA3'
x|||ox|||||||||||||x
3'UAGAAUUAAGGGCCUUAUGGACGUUCAGCCCUACUUUCCUUUCUUACACCUCGUUAGUUAUUUUUAGCUCACGCGAGUCG5' ( -22.60[66.86%] )
>RC-m0067_3p	|ppa004351m|PACid:17656845	|location[731,750]
5'UAUGGCAGGAAAGAAUGUGA3'
x|||ox|||||||||||||x
3'UAGAAUUAAGGGCCUUAUGGACGUUCAGCCCUACUUUCCUUUCUUACACCUCGUUAGUUAUUUUUAGCUCACGCGAGUCG5' ( -22.60[66.86%] )
>RC-m0067_3p	|ppa005247m|PACid:17664589	|location[397,416]
5'UAUGGCAGGAAAGAAUGUGA3'
x|||ox|||||||||||||x
3'CGGAAUUCAGGUCCAUAAGGACGUUCGGCCCUACUAUCCUUUCUUACACCUCGUUACUAACUUUUAGAUCGAGACAGACG5' ( -23.40[69.23%] )
>RC-m0067_3p	|ppa003739m|PACid:17667065	|location[104,123]
5'UAUGGCAGGAAAGAAUGUGA3'
o||x||||||||||||||ox
3'UAAAUAUGGUUCACAAGGUUGUUAGGAACUGUAACGUCCUUUCUUACAUCUGAAUCUUCUGAGCUCUUAACUCCGGUAAG5' ( -24.90[73.45%] )
>RC-m0070_3p	|ppa008835m|PACid:17651361	|location[410,431]
5'UCGAUGAAGACGGUGUGUAGGU3'
|||||||||||||||o|xxx||
3'AGGUACAUCCGCCGCUUCAUCGCCAAAAGUAGCUACUUCUGCCACGCCGGCAACAACAACUCCCGGAAGGUCUCCUCCCAGA5' ( -31.20[75.00%] )
>RC-m0070_3p	|ppa006469m|PACid:17660901	|location[977,998]
5'UCGAUGAAGACGGUGUGUAGGU3'
|x|x|||||||||||||x||x|
3'CCCUGGCUAACUAGCCUAACAACACGAUGAAACCACUUCUGCCACACUUCAACCCGUAUACCCUUACUCAGCCUCCUGUUCG5' ( -26.50[63.40%] )
>RC-m0077_5p	|ppa010552m|PACid:17664768	|location[1002,1022]
5'UCCAGUGGAAGGUGAGUGCUG3'
||||||||x||o||xo|||||
3'UGAGAGUAAAAACCGUUACGUAUUCUGUAAAGGUCACCAUCUACCUACGACUCUUUACGUUUCCUAGUCCUAUACGUCAGC5' ( -30.10[69.68%] )
>RC-m0078_3p	|ppa002329m|PACid:17656919	|location[567,587]
5'UUUGCAAGUAGAAAGGAUGCC3'
|||x||||o|||x|||||x||
3'CCGACAUUUAAACAGCAUGGAGUAGACUACAAAAGUUCGUCUGUCCUAGGGUAAAACAAACGGGGAGGUACCGUCUCAACC5' ( -21.80[60.89%] )
>RC-m0079_5p	|ppa019765m|PACid:17655115	|location[134,154]
5'GGAAUGUUGUCUGGCUCGAGG3'
o||x||||||||||||||xx|
3'AGUAUGGAGCUGGUCAGAAACUUAGUAGUCUCUAACAACAGACCGAGCAACCAAGACAGAGUCGUCUACUACUUCGUUUGA5' ( -29.60[70.14%] )
>RC-m0079_5p	|ppa000948m|PACid:17648147	|location[2175,2195]
5'GGAAUGUUGUCUGGCUCGAGG3'
ox||||||||||||||x||o|
3'UUAUCUCGUCCGUUAUGUCUUCGUUCAACAUAUUACAACAGACCGACCUUCCUCCUACCGUCCCGGCGAGCUGACGAUUCG5' ( -27.70[64.27%] )
>RC-m0079_5p	|ppa023304m|PACid:17651862	|location[134,154]
5'GGAAUGUUGUCUGGCUCGAGG3'
o||x||||||||||||||xx|
3'AGUAUGGAGCUGGUCAGAAACUUAGUAGUCUCUAACAACAGACCGAGCAACCAAGACAGAGUCGUCUACUACUUCGUUUGA5' ( -29.60[70.14%] )
>RC-m0079_5p	|ppa019730m|PACid:17660625	|location[807,827]
5'GGAAUGUUGUCUGGCUCGAGG3'
xx||||||||||||x|||||x
3'UCGUAAAGGUUUAACAUGUUGAGUUAUAUAGGUUACAACAGACCCAGCUCGAGAAGGUACUAGUUACGACGUAUAAGGAGU5' ( -27.60[63.74%] )
>RC-m0080_3p	|ppa015893m|PACid:17665674	|location[1124,1144]
5'UUCUUUCCUCUUUCGUUUCCA3'
o||||||||||o||||o|||x
3'GUGCCUAGAAGAGGGCGAAGUUGGAGGGAAGAGAAAGGAGAGAGCAGAGGAAGCCUAUUAGUCAGAGAAAAAGCGAACAAC5' ( -33.80[99.71%] )
>RC-m0080_3p	|ppa003722m|PACid:17641993	|location[276,296]
5'UUCUUUCCUCUUUCGUUUCCA3'
|x|||o||x|||||x||||||
3'UGUUGACUUUGGGGAAAGAAGUGUGAGAGUAUGAAGGGUGAAAGAAAAGGUAUCGCGUGGAGUGAGGGUUGGAACCUUCCU5' ( -20.60[61.13%] )
>RC-m0080_3p	|ppa004248m|PACid:17641994	|location[276,296]
5'UUCUUUCCUCUUUCGUUUCCA3'
|x|||o||x|||||x||||||
3'UGUUGACUUUGGGGAAAGAAGUGUGAGAGUAUGAAGGGUGAAAGAAAAGGUAUCGCGUGGAGUGAGGGUUGGAACCUUCCU5' ( -20.60[61.13%] )
>RC-m0080_3p	|ppa003820m|PACid:17662926	|location[1417,1437]
5'UUCUUUCCUCUUUCGUUUCCA3'
|o||||||||||ox|||||x|
3'AGAAAUCUACUAGUUAAAGAAGGAAAUUGAAGGAAAGGAGAAGACAAAGCUCAGACAGUUGUGACUCUACGAGGUUGAGCU5' ( -24.00[71.22%] )
>RC-m0080_3p	|ppa007163m|PACid:17641337	|location[587,607]
5'UUCUUUCCUCUUUCGUUUCCA3'
||||||||||||||xo||xx|
3'GUAGGCAAGUCGAAAUUCGGACCGGAAGAGAAGAAAGGAGAAAGAGAAAUUAAGGAAGAGGAGACGAGAAUUGACGAGGUU5' ( -25.12[74.10%] )
>RC-m0080_3p	|ppa000969m|PACid:17642628	|location[753,773]
5'UUCUUUCCUCUUUCGUUUCCA3'
||||o||||||x||||ox|||
3'UUUGGUGCGAAGCUAAACGGGUGUGGAUUUAAGAGAGGAGAUAGCAGUGGUGCGUUUGUUGGUAAGAGUGAUAGAAAGGGU5' ( -26.40[78.57%] )
>RC-m0080_3p	|ppa015582m|PACid:17666424	|location[638,658]
5'UUCUUUCCUCUUUCGUUUCCA3'
x|||o|||||||||||o|||x
3'CCGAUAACUCCUACGAACGGGUGUAUAAUACAGAGAGGAGAAAGCAGAGGCGGCACCCUAUACUCCUUUCUAGAUCCCGGU5' ( -33.20[98.22%] )
>RC-m0080_3p	|ppa024160m|PACid:17659622	|location[802,822]
5'UUCUUUCCUCUUUCGUUUCCA3'
|||||o||||||||x|||xx|
3'AUUUAGAAGAUUUCUUGGAUCAAGGUCGGAAAGAAGGGAGAAAGAAAAUCUGGAAGAGUUUCUCCAUCGUACGUACGAGGC5' ( -22.30[65.98%] )
>RC-m0080_3p	|ppb021735m|PACid:17666051	|location[263,283]
5'UUCUUUCCUCUUUCGUUUCCA3'
||||o||||||||xx|||||x
3'AGCUUAAAAAGUUGGUCGUUGUUAAUUUCGAAGAGAGGAGAAAUAAAAGGGAGAAUUUUGGAGAUUUUUGCUCAACAGGCA5' ( -24.60[72.57%] )
>RC-m0080_3p	|ppa003497m|PACid:17647499	|location[425,445]
5'UUCUUUCCUCUUUCGUUUCCA3'
|||||o||||||||x||||xx
3'GUCCAAUCUAAAGAGACAUCGACAUGAUAAAAGAAGGGAGAAAGAAAAGUGAAACGUACAAUCCUCCCGUAGUUAGCAGAC5' ( -23.90[70.50%] )
>RC-m0080_3p	|ppa011113m|PACid:17652970	|location[383,403]
5'UUCUUUCCUCUUUCGUUUCCA3'
|o||||||||||||o|ox|||
3'CGAAAACUGAAAUCGGGGCGUUCCCGUUGGAGGAAAGGAGAAAGUAGCGGUUUUUGUCUUUGUAUAUGAAAUUGGUGGACG5' ( -27.50[81.36%] )
>RC-m0080_3p	|ppa024348m|PACid:17663851	|location[1094,1114]
5'UUCUUUCCUCUUUCGUUUCCA3'
||||o|||||||||xo|x|||
3'AAAGAAGAAACGUUCCGGUUUUAGGUUGUCAAGAGAGGAGAAAGGGAUGGUGUAAAUGUUAGAGUUUAGGUGGACUUCAAU5' ( -25.30[75.52%] )
>RC-m0084_3p	|ppa008809m|PACid:17652296	|location[1311,1333]
5'UACGAAAAGCAUUGUAUGGAUUA3'
o||x|||||||||x||||||||x
3'GAUUUGGGAUUCUGGUUUUAAAUUUCUCGUGUGAUUUUCGUAAAAUACCUAAAGUACGAAACACGGGUAACUUUUGUUGGUGU5' ( -21.40[62.76%] )
>RC-m0085_5p	|ppa004946m|PACid:17653371	|location[84,106]
5'UCUGUAGUGGAUUUGUGUUGGAC3'
|||x|x|||||||||||||||x|
3'UACGGUUAAAGGUUAGGUGUGUGUGAAGAAAGAAAACACCUAAACACAACCCGACUCCCGAGAGAGAGAGAAGACAUCCUACU5' ( -28.30[69.02%] )
>RC-m0087_5p	|ppa013666m|PACid:17650371	|location[553,575]
5'GGGAUUCGAACUUGGGUGCAGAG3'
|o||||||||||||||||x|ox|
3'UUGAUGAGAUUUAAUUAAAUUAAAUGCUCUCUCUAAGCUUGAACCCACAUUCCCCCGUCUGAGCGACAGGAUUUGUUGAUCGA5' ( -34.60[73.93%] )
>RC-m0090_5p	|ppa001691m|PACid:17659392	|location[172,194]
5'AGGUUUUCUUUGUUUUGGACUCA3'
x||||||x||||||x|||||||x
3'UGCCUCUGUGGCUUUAGAGCCCGACGCAGCCCCAAAACAAACAACACCUGAGAACGUUCGAACUAGAAGAAUUGAACAAAGAA5' ( -25.10[70.70%] )
>RC-m0090_5p	|ppa007812m|PACid:17662041	|location[306,328]
5'AGGUUUUCUUUGUUUUGGACUCA3'
|oo||||||||||||||o|x|||
3'GUCAUUGACACCAACCUUAGGGCGGUUGUUUUUAAAAGAAACAAAACUUUAGUAAAGGGACAGGUCUUGGGAAACCUUACCAA5' ( -21.50[60.56%] )
>RC-m0090_5p	|ppa000202m|PACid:17669145	|location[1116,1138]
5'AGGUUUUCUUUGUUUUGGACUCA3'
|o||||o||||||||x|||x|||
3'AUCUAGGUUUUGAUAAACCCGCUUAGCAGUUUCAAAGGAAACAAACCCUUAGUUUACGUCCCAACAGUUAUUCUCGUAACUGU5' ( -22.10[62.43%] )
>RC-m0092_3p	|ppa015866m|PACid:17647449	|location[145,165]
5'UCUGUUUGGAUUGAAGAUGGC3'
|x|||||o||||||x|||||x
3'CCUUAGACCCUAGCCAGGAGCUUUCACCAAAAACAAAUCUAACUACUACCACUGGAGACAAUCCAAGGGUUAACUAUCACA5' ( -23.10[62.94%] )
>RC-m0092_3p	|ppa016361m|PACid:17642134	|location[1438,1458]
5'UCUGUUUGGAUUGAAGAUGGC3'
|||||o||||||||x|x|x||
3'AGUAUAUGAAACAGAAGACAGACCUAACUCCGAACGGACUUAAAGAAGAUCACAAAAGGGAAACCA5' ( -24.00[65.93%] )
>RC-m0092_3p	|ppa003318m|PACid:17661802	|location[532,552]
5'UCUGUUUGGAUUGAAGAUGGC3'
||||||x||||||||xx|o||
3'GGUCUAUAGUGGGAACGGGAGUUUCGGCGUAGACAAUCCUAACUUAAAUCGACGUCACUGAUCAAGUUACAGUAGAAGAUG5' ( -22.90[62.91%] )
>RC-m0092_3p	|ppa008320m|PACid:17653469	|location[15,35]
5'UCUGUUUGGAUUGAAGAUGGC3'
|||xx||||||||||||||ox
3'CUUCUUCUUCGUUUGGGAUCUAAGACUCUUAGAACAACCUAACUUCUACUCCCCCGAUAUUCCUA5' ( -23.50[64.38%] )
>RC-m0092_3p	|ppa026328m|PACid:17658290	|location[139,159]
5'UCUGUUUGGAUUGAAGAUGGC3'
|||x||||||||xx|o|||||
3'CAGACGGUACUUCAGUUGGUUCAUGGAAAAAGAGAAACCUAAGGUUUACCGUGGUGGAAGAAAAAGUUUCACGGUUCGAUG5' ( -23.40[64.29%] )
>RC-m0092_3p	|ppa000204m|PACid:17646646	|location[3684,3704]
5'UCUGUUUGGAUUGAAGAUGGC3'
|x||||||||||||||xx||x
3'CGUCGUGCUCCGAGAGAAAAUUAAGAUCUUAUACAAACCUAACUUCGUCCAUUGCCGACCGUAGACCGUUAUAGAACUGAU5' ( -24.30[67.13%] )
>RC-m0092_3p	|ppa001444m|PACid:17650447	|location[2141,2161]
5'UCUGUUUGGAUUGAAGAUGGC3'
||ox|||||||||xx||||||
3'GUAGAGGGUCUCAGAGGUCUUUUCAUAUUUAGGAAAACCUAACCCCUACCGAACACGAAGGUCUCAUCUUUCACACUUGGA5' ( -24.00[65.93%] )
>RC-m0092_3p	|ppa020366m|PACid:17659413	|location[917,937]
5'UCUGUUUGGAUUGAAGAUGGC3'
o||||||||||x||||x|||x
3'UCUGUCUCUGUAAUUACGAUGAGGUCUGGAGGACAAACCUACCUUCGACCCGUUAAAAGAGGCGUUAAAGGUACAGAAGGC5' ( -24.60[67.58%] )
>RC-m0093_3p	|ppa000435m|PACid:17668087	|location[2073,2094]
5'AAGGUGGUAUGAGAAUGUGGUA3'
|||||||o|||||x|||x||x|
3'UAAUUCGUAUGAUCUACGUUUAUAGACUCCUUCCACCGUACUCGUACUCCUUUCUUCGACUUAACUUAGGUUUACAUCGUUC5' ( -27.00[71.24%] )
>RC-m0095_3p	|ppa007685m|PACid:17661678	|location[346,367]
5'CAGAGAGGUCUGGCUCCUUGGU3'
x|||||||x|||xx||||||||
3'AGCCCCCUCGCCUGGUCUAACGGCAGUGGCUUCUCUCCCGACAUAGGAACCAACUUCCCCUACCACCACUCCAAUGACUUUC5' ( -29.30[63.01%] )
>RC-m0095_3p	|ppa005114m|PACid:17661492	|location[736,757]
5'CAGAGAGGUCUGGCUCCUUGGU3'
||||||xx|||oo|||||||||
3'GUUCUAGGAAGGUCGUUUGUAAGAGUUAUUGUCUCUGGAGAUUGAGGAACCAAAGGAAAACGACCAGUAACCGACCCGGUGA5' ( -32.90[70.45%] )
>RC-m0096_5p	|ppa003136m|PACid:17643333	|location[1335,1355]
5'UGCCUGGCUCCCUGUAUGCCA3'
||||||||||||||o||||||
3'ACCCUAUCUAAUCUAUGUGUCAUAUCUAGAACGGACCGAGGGACGUACGGUCGUCCUUUUCACAAUAUCAAGUUGUUCCUA5' ( -46.30[100.00%] )
>RC-m0096_5p	|ppa002082m|PACid:17645207	|location[1344,1364]
5'UGCCUGGCUCCCUGUAUGCCA3'
||||||||||||||||||||x
3'UCUAGACUAUUUCUAUAAGAUUUAACUCGUACGGACCGAGGGACAUACGGACGUCCUCACAACAGUCCAUCUGUUGUGUUC5' ( -46.30[100%] )
>RC-m0096_5p	|ppa002195m|PACid:17653376	|location[1580,1600]
5'UGCCUGGCUCCCUGUAUGCCA3'
||||||||||||||o||||||
3'UAUAGACUAUUCCUAUCUGGUAUUACUGGUACGGACCGAGGGACGUACGGUCGUCCUCAAAACAGCCCGUCUGUUGGUUUU5' ( -46.10[100.00%] )
>RC-m0096_5p	|ppa002691m|PACid:17640912	|location[2583,2603]
5'UGCCUGGCUCCCUGUAUGCCA3'
||||||x|||||||ox|||x|
3'UAAAUCCACGUUUUGUUAUAGGUCAUUUGGACGGACGGAGGGACGGACGAUCAACCCGUGUUCAGCCCGUUUUGACCAGAG5' ( -33.90[73.22%] )
>RC-m0096_5p	|ppa002710m|PACid:17657536	|location[1272,1292]
5'UGCCUGGCUCCCUGUAUGCCA3'
||||||||||||||||||||x
3'UGUAGGCUACUUCUAUCAAGUUUAACUCGAACGGACCGAGGGACAUACGGGCGACUAUAAAACAGACUAUGUGAUGUAUUC5' ( -46.30[100.00%] )
>RC-m0097_5p	|ppa008065m|PACid:17662475	|location[1058,1078]
5'UAGCCAAGGAUGACUUGCCUG3'
||||||||||||xx||||x||
3'AGUAGGAGAGGAACGCGAAGAGUUUCUUAGAUCGGUUCCUACGAAACGCACGAACUCCGUGACCAUGACGACCUUAGUCCA5' ( -27.30[66.42%] )
>RC-m0097_5p	|ppa011476m|PACid:17641245	|location[661,681]
5'UAGCCAAGGAUGACUUGCCUG3'
|||||||||||||xx||xx||
3'GAGUGAAUCAGUUGAGUCGACUCUCACACAAUCGGUUCCUACUAUACCAACUUCCUCUGUGGGGAGAUCAGGGUGGGUUUA5' ( -28.02[68.34%] )
>RC-m0097_5p	|ppa012173m|PACid:17666161	|location[698,718]
5'UAGCCAAGGAUGACUUGCCUG3'
x|||||||o||||x|||||||
3'GUGUUGUGGGUUAUUAAUGUUUUCAUUGGUUUCGGUUCUUACUAAACGGACUAUAUCUGUAACGUGUCGUCCCAAAGUGGG5' ( -30.30[74.26%] )
>RC-m0098_5p	|ppa000884m|PACid:17650408	|location[2577,2597]
5'UAGGGCUCCUCUUUCUUGGCA3'
||xo||||||||||xx|||||
3'UACUAGAGGGGUUUCGACAUAUGUAGGGACAUAUCGAGGAGAAAACACCGUGAUAACCAUAGUGGACAUAGGGAAAACCUU5' ( -26.80[64.58%] )
>RC-m0098_5p	|ppa004780m|PACid:17645927	|location[1033,1053]
5'UAGGGCUCCUCUUUCUUGGCA3'
|x||x||||||||||||ox||
3'CAAACGAGACGUCAGAGGCGUCGGAAGACGAACCAGAGGAGAAAGAAUGGUCUGUUCAUCAGGUACCGAAAAGCUCGUCGC5' ( -26.00[62.35%] )
>RC-m0098_5p	|ppa005234m|PACid:17651481	|location[80,100]
5'UAGGGCUCCUCUUUCUUGGCA3'
|x||||||||||o|||||x|x
3'UUACUUGGACCUCCCUCCAAUCGGGAAAAGACCCCGAGGAGAGAGAACAGGGAAAAGCACUUUUAAUUUUUACUCUCUUCC5' ( -32.50[77.75%] )
>RC-m0098_5p	|ppa008203m|PACid:17667763	|location[587,607]
5'UAGGGCUCCUCUUUCUUGGCA3'
|x|||||||||oo|x||||||
3'GAAAAAGACGAAAUUCUUCCUGUAGUCAGGACCCCGAGGAGGGAUAACCGUGACGACCCCACAGGAGUAGUGUACCUGGUA5' ( -32.20[77.03%] )
>RC-m0098_5p	|ppa008279m|PACid:17667764	|location[578,598]
5'UAGGGCUCCUCUUUCUUGGCA3'
|x|||||||||oo|x||||||
3'GAAAAAGACGAAAUUCUUCCUGUAGUCAGGACCCCGAGGAGGGAUAACCGUGACGACCCCACAGGAGUAGUGUACCUGGUA5' ( -32.20[77.03%] )
>RC-m0098_5p	|ppa000011m|PACid:17653665	|location[7779,7799]
5'UAGGGCUCCUCUUUCUUGGCA3'
|x|o|||||||||o|||||x|
3'CAACAUUAAGGCACGAGCACAAGUAUUCAAAACUCGAGGAGAAGGAACCCUUCGUUUGAUACUCUACCAUAGACUUCAACG5' ( -32.00[76.56%] )
>RC-m0098_5p	|ppa004529m|PACid:17668351	|location[1418,1438]
5'UAGGGCUCCUCUUUCUUGGCA3'
||x|x||||||o|x|||||||
3'GCAGAUGUAUACCACCUCAUUUGAGAGGUAAUACGGAGGAGGAUGAACCGUAAGGGGUUCCUAAUUUAGGUGGUCUUUUCG5' ( -27.30[65.16%] )
>RC-m0098_5p	|ppa014894m|PACid:17648368	|location[60,80]
5'UAGGGCUCCUCUUUCUUGGCA3'
|x||||||||||||||oxx||
3'AACCUUUGUUACCACCGUUUGUAUCUUUCAAACCCGAGGAGAAAGAGAGGUUAUACAAAUCCUUCUCGUUCGAGUUGUAGA5' ( -30.90[73.92%] )
>RC-m0098_5p	|ppa000438m|PACid:17649984	|location[91,111]
5'UAGGGCUCCUCUUUCUUGGCA3'
o||||||x||||||||x|||x
3'UCCCAAAAGUUCACGCCAGAACUUUCUUUAGUCCCGAAGAGAAAGACCCGAGACGAGUAAAACUAUUUGUUACCGUAACCA5' ( -30.70[73.44%] )
>RC-m0098_5p	|ppa003822m|PACid:17647745	|location[981,1001]
5'UAGGGCUCCUCUUUCUUGGCA3'
||oo||||||||||x|||x||
3'UUUGAACUAAACAUAUACAAGGUAUGGGCUAUUUCGAGGAGAAACAACGGUUGUAAUGGUAUCUCUGAAUUUUCUAUUACU5' ( -25.30[60.82%] )
>RC-m0099_3p	|ppa002027m|PACid:17648996	|location[1059,1079]
5'UCAUUUCAGCAAGCAGCGUUA3'
|||||o|||||||x|||||x|
3'ACAUAUAAAACCAUCGGCUAUGUCCACGUUAGUAAGGUCGUUCAUCGCACUGUCAGCGAUUCUAGAUUCAAUCAUAAUAAU5' ( -26.90[74.72%] )
>RC-m0099_3p	|ppa000091m|PACid:17646118	|location[2177,2197]
5'UCAUUUCAGCAAGCAGCGUUA3'
o||||xx|||||||||||||x
3'GAUGUUGUCUUGGAGCUCUAAAGUCUGGUAGGUAAUUUCGUUCGUCGCAACUGUGUUGGCUUGAUACACAGACUAGAACGA5' ( -27.50[75.97%] )
>RC-m0099_3p	|ppa018599m|PACid:17641633	|location[972,992]
5'UCAUUUCAGCAAGCAGCGUUA3'
|xx||o|||||||||||x|||
3'UUGUCUAUCAACUUAGGUUCCGUCAGUGUUAAAAAGGUCGUUCGUCGGAAUGUUAGUGACUACGACUUCGAACAUAAACUU5' ( -26.80[74.44%] )
>RC-m0099_3p	|ppa003439m|PACid:17668154	|location[1305,1325]
5'UCAUUUCAGCAAGCAGCGUUA3'
|||||||x|||||||ox|o||
3'AGUGACGUAACCCGAAGUUUGGUAUGUCGAAGUAAAGACGUUCGUUUCGAUUCCGAAGUACCGGUUCUGGCAAGUAAGGUA5' ( -22.50[62.15%] )
>RC-m0099_3p	|ppa004992m|PACid:17644515	|location[1085,1105]
5'UCAUUUCAGCAAGCAGCGUUA3'
|||||||||||||||||oxo|
3'UCAGAGGGAACCGUUCCAAUGGCCGACUCGAGUAAAGUCGUUCGUCGUUGUCCGGGGAUGGUGCGCCGUUUGGGAAGUUAA5' ( -31.40[86.98%] )
>RC-m0100_3p	|ppa000884m|PACid:17650408	|location[2577,2597]
5'UAGGGCUCCUCUUUCUUGGCA3'
||xo||||||||||xx|||||
3'UACUAGAGGGGUUUCGACAUAUGUAGGGACAUAUCGAGGAGAAAACACCGUGAUAACCAUAGUGGACAUAGGGAAAACCUU5' ( -26.80[64.58%] )
>RC-m0100_3p	|ppa004780m|PACid:17645927	|location[1033,1053]
5'UAGGGCUCCUCUUUCUUGGCA3'
|x||x||||||||||||ox||
3'CAAACGAGACGUCAGAGGCGUCGGAAGACGAACCAGAGGAGAAAGAAUGGUCUGUUCAUCAGGUACCGAAAAGCUCGUCGC5' ( -26.00[62.35%] )
>RC-m0100_3p	|ppa005234m|PACid:17651481	|location[80,100]
5'UAGGGCUCCUCUUUCUUGGCA3'
|x||||||||||o|||||x|x
3'UUACUUGGACCUCCCUCCAAUCGGGAAAAGACCCCGAGGAGAGAGAACAGGGAAAAGCACUUUUAAUUUUUACUCUCUUCC5' ( -32.50[77.75%] )
>RC-m0100_3p	|ppa008203m|PACid:17667763	|location[587,607]
5'UAGGGCUCCUCUUUCUUGGCA3'
|x|||||||||oo|x||||||
3'GAAAAAGACGAAAUUCUUCCUGUAGUCAGGACCCCGAGGAGGGAUAACCGUGACGACCCCACAGGAGUAGUGUACCUGGUA5' ( -32.20[77.03%] )
>RC-m0100_3p	|ppa008279m|PACid:17667764	|location[578,598]
5'UAGGGCUCCUCUUUCUUGGCA3'
|x|||||||||oo|x||||||
3'GAAAAAGACGAAAUUCUUCCUGUAGUCAGGACCCCGAGGAGGGAUAACCGUGACGACCCCACAGGAGUAGUGUACCUGGUA5' ( -32.20[77.03%] )
>RC-m0100_3p	|ppa000011m|PACid:17653665	|location[7779,7799]
5'UAGGGCUCCUCUUUCUUGGCA3'
|x|o|||||||||o|||||x|
3'CAACAUUAAGGCACGAGCACAAGUAUUCAAAACUCGAGGAGAAGGAACCCUUCGUUUGAUACUCUACCAUAGACUUCAACG5' ( -32.00[76.56%] )
>RC-m0100_3p	|ppa004529m|PACid:17668351	|location[1418,1438]
5'UAGGGCUCCUCUUUCUUGGCA3'
||x|x||||||o|x|||||||
3'GCAGAUGUAUACCACCUCAUUUGAGAGGUAAUACGGAGGAGGAUGAACCGUAAGGGGUUCCUAAUUUAGGUGGUCUUUUCG5' ( -27.30[65.16%] )
>RC-m0100_3p	|ppa014894m|PACid:17648368	|location[60,80]
5'UAGGGCUCCUCUUUCUUGGCA3'
|x||||||||||||||oxx||
3'AACCUUUGUUACCACCGUUUGUAUCUUUCAAACCCGAGGAGAAAGAGAGGUUAUACAAAUCCUUCUCGUUCGAGUUGUAGA5' ( -30.90[73.92%] )
>RC-m0100_3p	|ppa000438m|PACid:17649984	|location[91,111]
5'UAGGGCUCCUCUUUCUUGGCA3'
o||||||x||||||||x|||x
3'UCCCAAAAGUUCACGCCAGAACUUUCUUUAGUCCCGAAGAGAAAGACCCGAGACGAGUAAAACUAUUUGUUACCGUAACCA5' ( -30.70[73.44%] )
>RC-m0100_3p	|ppa003822m|PACid:17647745	|location[981,1001]
5'UAGGGCUCCUCUUUCUUGGCA3'
||oo||||||||||x|||x||
3'UUUGAACUAAACAUAUACAAGGUAUGGGCUAUUUCGAGGAGAAACAACGGUUGUAAUGGUAUCUCUGAAUUUUCUAUUACU5' ( -25.30[60.82%] )
>RC-m0101_5p	|ppa009932m|PACid:17656206	|location[357,377]
5'UGAGCAAUGGCACACAGCCCU3'
||x|||||o||x||x||||||
3'GGUUCUUCGAACAUUGCCUCUCUGAGUCGAACCCGUUAUCGCGUUUCGGGAGAUAACAAUUGGAAGAGUCGUAUUUCGAGU5' ( -26.90[61.28%] )
>RC-m0101_5p	|ppa009332m|PACid:17665631	|location[462,482]
5'UGAGCAAUGGCACACAGCCCU3'
|||||||||||x||x||x||o
3'GGUUCCUCGAACAUUGCCUCUCUAAGUCGGACUCGUUACCGCGUCUCUGGGGACAACAAGUGGAAGAGUCGCAUAUCGAGU5' ( -30.10[68.56%] )
>RC-m0101_5p	|ppa020178m|PACid:17663235	|location[225,245]
5'UGAGCAAUGGCACACAGCCCU3'
||||||||||||||x||||xo
3'GGUUCUUCAAACAUUGCGUUUCUGAGACGAACUCGUUACCGUGUUUCGGCGAAGACUUGUUGUCUACAGUCAAGAGAUUAA5' ( -34.00[77.63%] )
>RC-m0102_3p	|ppa015762m|PACid:17660226	|location[569,590]
5'UUCCCAAGCCCGCCCAUUCCAA3'
|||||x|||||x|||||o||||
3'AGGAAUAUCUGAACGAACCGGUUCCACCAAAAGGGGUCGGGAGGGUAGGGUUGCUGGCGCUGACGGACCGCAGAUCGCAGCG5' ( -35.80[77.66%] )
>RC-m0102_3p	|ppa016482m|PACid:17643319	|location[569,590]
5'UUCCCAAGCCCGCCCAUUCCAA3'
|||||x|||||xx||||o||||
3'AGGAAUAUCUGAACGAACCGGUUCCACCAAAAGGGGUCGGGACGGUAGGGUUGCUGGCGCUGACGGACCGCAGGUUGCAGCG5' ( -31.30[67.90%] )
>RC-m0102_3p	|ppa020740m|PACid:17647985	|location[569,590]
5'UUCCCAAGCCCGCCCAUUCCAA3'
|||||x|||||x|||||o||||
3'AGGAAUAUCUGAACGAACCGGUUCCACCAAAAGGGGUCGGGAGGGUAGGGUUGCUGGCGCUGACGGACCGCAGGUCGUAGCG5' ( -35.80[77.66%] )
>RC-m0102_3p	|ppa017041m|PACid:17667310	|location[692,713]
5'UUCCCAAGCCCGCCCAUUCCAA3'
|||||||xx||||||||o||x|
3'AACAAUAUUUACCGAAACCGUUCGCAACAAAAGGGUUACGGCGGGUAGGGGUUUUAUGGUUAGUACGCUUGUUGUAGGAAUC5' ( -34.20[74.19%] )
>RC-m0102_3p	|ppa024045m|PACid:17656398	|location[656,677]
5'UUCCCAAGCCCGCCCAUUCCAA3'
||x||||x|||||||||x|||x
3'GACAACUUUUCUCGGAACCGUUCACAACAGAACGGUUGGGGCGGGUACGGUACUUAAGGGUCUUGAGCUUGAGGCGACCUAG5' ( -31.00[67.39%] )
>RC-m0102_3p	|ppa022876m|PACid:17647411	|location[599,620]
5'UUCCCAAGCCCGCCCAUUCCAA3'
||x||||x||||||||||||||
3'AGUAACAUUUCGUAAGCUCGUUCCCAACAGAACGGUUGGGGCGGGUAAGGUUGUUACCACUCCUUUCUGUGUAGUAGAAACG5' ( -35.40[76.79%] )
>RC-m0102_3p	|ppa001212m|PACid:17660869	|location[548,569]
5'UUCCCAAGCCCGCCCAUUCCAA3'
|||||x|x|||o|||||||||x
3'AACAAUACCUAGACCCAUUCCUCCCACCAGAAGGGGUGGGGUGGGUAAGGUAUAUUCGGUUAGUAAGGGUGAACAAGUAGAA5' ( -35.70[77.44%] )
>RC-m0102_3p	|ppa019630m|PACid:17663538	|location[1643,1664]
5'UUCCCAAGCCCGCCCAUUCCAA3'
|||||||o||||||x|o|||||
3'GGUGGUAGCAGCUAUAUCGGAAACAUGUGCAAGGGUUUGGGCGGUUGAGGUUACUACUUUGAUAGUAACUUCAAAACCCACC5' ( -37.00[80.61%] )
>RC-m0102_3p	|ppa000373m|PACid:17640939	|location[1200,1221]
5'UUCCCAAGCCCGCCCAUUCCAA3'
|||||x|o|||x||||||||x|
3'ACUACUAUAUAUCUAAAUCGGUUUCAACAAAAGGGGUUGGGAGGGUAAGGGUGUUACCCGUAGUGGCUCUCUAUCAAGAGAA5' ( -32.90[71.37%] )
>RC-m0102_3p	|ppa001409m|PACid:17643330	|location[1828,1849]
5'UUCCCAAGCCCGCCCAUUCCAA3'
|||||||ox||o||x|||||||
3'CAAGGUAGUAAAUUCUGAGGAAACAUAUGGAAGGGUUUUGGUGGUUAAGGUUAUUGGGUUGAGAGUAGUUUCAAUAAACAUC5' ( -28.50[61.69%] )
>RC-m0102_3p	|ppa001594m|PACid:17658510	|location[1496,1517]
5'UUCCCAAGCCCGCCCAUUCCAA3'
|||||||o|||o||x|||||||
3'CAAGGUAGUAAAUUCUGAGGGAACAUAUGGAAGGGUUUGGGUGGCUAAGGUUAUUGGGUUGAGAGUAGUUUCAAUAAACAUC5' ( -35.40[76.62%] )
>RC-m0102_3p	|ppa022498m|PACid:17650031	|location[650,671]
5'UUCCCAAGCCCGCCCAUUCCAA3'
||x||||x|||o|||||||||x
3'ACUAACCGGUUCCGAAAGUCGUGUCAUCAGAACGGUUAGGGUGGGUAAGGUAUUUACCGUUAAGAUGGUUAACACUGUGAUA5' ( -31.40[68.11%] )
>RC-m0102_3p	|ppa000335m|PACid:17645193	|location[690,711]
5'UUCCCAAGCCCGCCCAUUCCAA3'
||x||||x|||o||||||||||
3'AGUAACAUUUCGUAAGCUCGUUCCCAACAGAACGGUUGGGGUGGGUAAGGUUGUUACCACUCCUUUCUGUGUCCUAGGAACG5' ( -33.50[72.67%] )
>RC-m0102_3p	|ppa000343m|PACid:17655980	|location[596,617]
5'UUCCCAAGCCCGCCCAUUCCAA3'
||x||||x||||||||||||x|
3'AGUAAUAUUUCCUCGACUCGCUCCCAGCAGAACGGUUGGGGCGGGUAAGGGUGAUACCACUACUGUCUAUGUAGGAACAACG5' ( -34.40[74.62%] )
>RC-m0102_3p	|ppa000391m|PACid:17667187	|location[602,623]
5'UUCCCAAGCCCGCCCAUUCCAA3'
||x||||x||||||||||||x|
3'AGUAAUAUUUCCUCGACUCGCUCCCAACAGAACGGUUGGGGCGGGUAAGGGUGAUACCACUACUGCCUCUGUAGGAACAGCG5' ( -34.40[74.62%] )
>RC-m0102_3p	|ppa000407m|PACid:17665535	|location[605,626]
5'UUCCCAAGCCCGCCCAUUCCAA3'
||x||||x|||o||||||||||
3'AGUAACAUUUCGUAAGCUCGUUCCCAACAGAACGGUUGGGGUGGGUAAGGUUGUUACCCCUACUGUCUGUGUAAAAGGAGCG5' ( -33.50[72.67%] )
>RC-m0102_3p	|ppa014576m|PACid:17652031	|location[608,629]
5'UUCCCAAGCCCGCCCAUUCCAA3'
||x||||x|||o||||||||||
3'AGUAACAUUUCGUAAGCUCGUUCCCAACAGAACGGUUGGGGUGGGUAAGGUUGUUACCACUACUGUCUGUGUAGUAGGAACG5' ( -33.50[72.67%] )
>RC-m0102_3p	|ppa015274m|PACid:17652407	|location[605,626]
5'UUCCCAAGCCCGCCCAUUCCAA3'
||x||||x||||||||||||||
3'AGUAACAUUUCGUCAGCUCGUUCCCAACAGAACGGUUGGGGCGGGUAAGGUUGUUACCACUACUGUCUGUGUAGUAGGAACG5' ( -35.40[76.79%] )
>RC-m0102_3p	|ppa017078m|PACid:17669268	|location[599,620]
5'UUCCCAAGCCCGCCCAUUCCAA3'
||x||||x|||o||||||||||
3'AACAACAUUUCGUAAGCUCGUUCCCAACAGAACGGUUGGGGUGGGUAAGGUUGUUACCACUCCUGUCUGUGUAGUAGGAACG5' ( -33.50[72.67%] )
>RC-m0102_3p	|ppa017126m|PACid:17658905	|location[599,620]
5'UUCCCAAGCCCGCCCAUUCCAA3'
||x||||x|||o||||||||||
3'AACAACAUCUCGUAAGCUCGUUCCCAACAGAACGGUUGGGGUGGGUAAGGUUGUUACCACUCCUGUCUGUGUAGUAGGAACG5' ( -33.50[72.67%] )
>RC-m0102_3p	|ppa017399m|PACid:17650765	|location[479,500]
5'UUCCCAAGCCCGCCCAUUCCAA3'
||x||||x|||o||||||||||
3'AGUAACAUUUCGUAAGCUCGUUCCCAACAGAACGGUUGGGGUGGGUAAGGUUGUUACCCCUACUGUCUGUGUAAAAGGAGCG5' ( -33.50[72.67%] )
>RC-m0102_3p	|ppa019071m|PACid:17651510	|location[602,623]
5'UUCCCAAGCCCGCCCAUUCCAA3'
||x||||x||||||||||||x|
3'AGUAAUAUUUCCUCGACUCGCUCCCAACAGAACGGUUGGGGCGGGUAAGGGUGAUACCACUACUGCCUCUGUAGGAACAGCG5' ( -34.40[74.62%] )
>RC-m0102_3p	|ppa019097m|PACid:17656486	|location[605,626]
5'UUCCCAAGCCCGCCCAUUCCAA3'
||x||||x|||o||||||||||
3'AGUAACAUUUCGUAAGCUCGCUCCCAACAGAACGGUUGGGGUGGGUAAGGUUGUUACCAUUAGUGUCUGUGUAGUAGGAAUG5' ( -33.50[72.67%] )
>RC-m0102_3p	|ppa019824m|PACid:17667837	|location[608,629]
5'UUCCCAAGCCCGCCCAUUCCAA3'
||x||||x||||||||||||||
3'AGUAACAUUUCGUACGCCCGUUCCCAACAGAACGGUUGGGGCGGGUAAGGUUGUUACCACUACUUCCUGUGUAGGAGGAACG5' ( -35.40[76.79%] )
>RC-m0102_3p	|ppa020450m|PACid:17647153	|location[428,449]
5'UUCCCAAGCCCGCCCAUUCCAA3'
||x||||x||||||||||||||
3'AGUAACAUUUCGUUAGCCCGUUACCAACAGAACGGUUGGGGCGGGUAAGGUUGUUACCACUCCUGUCUGUGUAGUAGGAACG5' ( -35.40[76.79%] )
>RC-m0102_3p	|ppa020745m|PACid:17668467	|location[482,503]
5'UUCCCAAGCCCGCCCAUUCCAA3'
||x||||x||||||||||||||
3'AGUAACAUUUCGUUAGCCCGUUCCCAACAGAACGGUUGGGGCGGGUAAGGUUGUUACCACUCCUGUCUGUGUAGUAGGAACG5' ( -35.40[76.79%] )
>RC-m0102_3p	|ppa021541m|PACid:17662924	|location[575,596]
5'UUCCCAAGCCCGCCCAUUCCAA3'
||x||||x|||o||||||||||
3'AGUAAUAUUUCGUCAGCCCGUUCCCAACAGAACGGUUAGGGUGGGUAAGGUUGUUACCACUCCUGUCUGUGUAGUAGGAAUG5' ( -31.40[68.11%] )
>RC-m0102_3p	|ppa023090m|PACid:17652579	|location[575,596]
5'UUCCCAAGCCCGCCCAUUCCAA3'
||x||||x|||o||||||||||
3'AGUAACAUUUCGUAAGCUCGUUCCCAACAGAACGGUUGGGGUGGGUAAGGUUGUUACCAUUAGUGUCUGUGUAGUAGGAAUG5' ( -33.50[72.67%] )
>RC-m0102_3p	|ppa026310m|PACid:17662333	|location[587,608]
5'UUCCCAAGCCCGCCCAUUCCAA3'
||x||||x||||||||||||x|
3'AGUAAUAUUUCCUCGACUCGCUCCCAACAGAACGGUUGGGGCGGGUAAGGGUGAUACCACUACUGUCUAUGUAGGAACAACG5' ( -34.40[74.62%] )
>RC-m0103_3p	|ppa010980m|PACid:17644257	|location[95,115]
5'GCUCUCUAUGCUUCUGUCAUC3'
|||||||xx|||||o|||x||
3'GUGCCAAGACGCACUGUCCAUCAUAGACACCGAGAGACCCGAAGGCAGCAGAUGUAUCGGUCAGUUCGUUCCGGGAUUAUA5' ( -28.00[71.61%] )
>RC-m0103_3p	|ppa002390m|PACid:17664813	|location[823,843]
5'GCUCUCUAUGCUUCUGUCAUC3'
||o||||||||||xx|x||||
3'GAGGUUUACGAAAGGGGUGACACGAUAUAUCGGGAGAUACGAAACCUGUAGUAAUUUGAGACGUUAACUAUAGAGUUCCAU5' ( -26.30[66.92%] )
>RC-m0103_3p	|ppa001304m|PACid:17644262	|location[2039,2059]
5'GCUCUCUAUGCUUCUGUCAUC3'
||||||x||||o||||||||x
3'CCUCAUCCGACUCCACAUCUUUAUGGUGGACGAGAGUUACGGAGACAGUACCUCUACCACCCUGGUGACUAUCUUCUUCGG5' ( -32.50[81.05%] )
>RC-m0103_3p	|ppa003898m|PACid:17666325	|location[1538,1558]
5'GCUCUCUAUGCUUCUGUCAUC3'
|||x|||x||||||||||xo|
3'AAUAGUUGAAAGAAGCAAUAUGAUCACAGCCGAAAGAAACGAAGACAGAGGAGUGGGAGGGUCUAAUGGAGUCAGUGAAGA5' ( -24.90[63.68%] )
>RC-m0103_3p	|ppa021398m|PACid:17661065	|location[18,38]
5'GCUCUCUAUGCUUCUGUCAUC3'
x||||||x|||o||||||x||
3'GGGGGCUAAAGGUACGCUUCGUGGUAAGAGAGAGAGAGACGGAGACAGAAGCAGAGACAGAGGUCUCU5' ( -27.90[69.58%] )
>RC-m0103_3p	|ppa006426m|PACid:17668810	|location[892,912]
5'GCUCUCUAUGCUUCUGUCAUC3'
||x|||||||||||||||xx|
3'UCGCCUCUAUUAGCUUAAUUACAACGGCCACGUGAGAUACGAAGACAGCUGAGGUGGCAACCAGUAGAGUCGUUAUUAGAC5' ( -32.00[80.00%] )
>RC-m0103_3p	|ppa019020m|PACid:17644780	|location[916,936]
5'GCUCUCUAUGCUUCUGUCAUC3'
||x|||||x|||||||||xx|
3'UCGCCUCUAUUAGCUUAAUUACAACGGCCACGUGAGAUUCGAAGACAGCUGAGGUGGUAAGCAGUAGAGUCGUUAUUAGAC5' ( -27.70[69.25%] )
>RC-m0103_3p	|ppa020320m|PACid:17657109	|location[460,480]
5'GCUCUCUAUGCUUCUGUCAUC3'
||x|||||||||o||o|||x|
3'UCGGCUAUAGUACCGCAAUUAUAACGGACACGUGAGAUACGAGGAUAGUUGAGGUGGCAAACAGUAGAGUCGUUGUUGACC5' ( -30.00[75.00%] )
>RC-m0105_3p	|ppa001561m|PACid:17644415	|location[1826,1847]
5'UGAUUGAGCCGUGCCAAUAUCA3'
|||||||||||o|||||||||x
3'ACUUCCCCGAAAGGUUGUCCCCUUUCGACCACUAACUCGGCGCGGUUAUAGGGAACGCGCACACUUUUCAAGGGUCAGGGAU5' ( -39.30[98.74%] )
>RC-m0105_3p	|ppa016845m|PACid:17663724	|location[90,111]
5'UGAUUGAGCCGUGCCAAUAUCA3'
|||||||xx||||||||||x|x
3'AACCAUGUGUGCGUUGGUUUUACUCAGCAAACUAACUAAGCACGGUUAUCGGGGUAGAAGUUUCUGUCUUUGGGUGGGAGAC5' ( -26.20[65.34%] )
>RC-m0105_3p	|ppa000996m|PACid:17657769	|location[1714,1735]
5'UGAUUGAGCCGUGCCAAUAUCA3'
|||||xx|||||||||xx||||
3'GGGUCAGAAAAGUUGUAUGAAUUCUUUGACACUAAAACGGCACGGUCCUAGUGGAUCCUCUUCAUGUAAAUAUAGGGGAGCC5' ( -26.60[66.83%] )
>RC-m0105_3p	|ppa001824m|PACid:17642564	|location[1755,1776]
5'UGAUUGAGCCGUGCCAAUAUCA3'
||x|ox|||||||||||x||||
3'UCAUAAAAGGAGUCAAACUAGACGGGGCUUACGAGAUCGGCACGGUUUUAGUCUAUAAAAACCUAAGUAUAGAAAUAGAUCG5' ( -26.79[67.31%] )
>RC-m0105_3p	|ppa001781m|PACid:17656366	|location[1277,1298]
5'UGAUUGAGCCGUGCCAAUAUCA3'
|||||||||||o|||||||||x
3'ACUUUUCCGAAUGGUUGCCCUCUCUCGACCACUAACUCGGCGCGGUUAUAGGGAACGCGCUCACGGCCUAAAGGACAAAGCU5' ( -39.30[98.74%] )
>RC-m0106_3p	|ppa012437m|PACid:17648072	|location[161,180]
5'AAAGACUAAAAUACCCUUGA3'
|||||||||||xxx|||||x
3'ACGCCUCUAACUUCUCCUCCACCUCCACCUUUUCUGAUUUUCCAGGAACAAUGACGCCAACCCUCGUAGCAGAUCCUCGU5' ( -17.40[60.84%] )
>RC-m0106_3p	|ppa013211m|PACid:17655878	|location[447,466]
5'AAAGACUAAAAUACCCUUGA3'
|x|||||x|||||||||oo|
3'UGAAAUUUUUGAUCGGUUUUUGAGUCAAUUUAUCUGAGUUUAUGGGAGUUAUAAAUUUGAGUGUAUUUUGGAUUCUUCCU5' ( -21.30[74.48%] )
>RC-m0106_3p	|ppa017834m|PACid:17641445	|location[71,90]
5'AAAGACUAAAAUACCCUUGA3'
||||||||||||||||||o|
3'GAAGUGGUGGGAGUGUUUGGAUCUUUUAUCUUUCUGAUUUUAUGGGAAUUUUAUAUACCUUUUAACUUACCACAAUUUCA5' ( -26.30[92.28%] )
>RC-m0108_5p	|ppa008953m|PACid:17642768	|location[644,665]
5'UGAUAUUGGCACGGCUCAAUCA3'
|||o|||o||||x|||||||x|
3'GUCUUAGUCGUGAAGAGAACCAGGGUCGACACUGUAAUCGUGACGAGUUACUUCUUCUUCUACUCCUGCUGCUUCUUCGACU5' ( -27.10[68.09%] )
>RC-m0108_5p	|ppa008961m|PACid:17642769	|location[644,665]
5'UGAUAUUGGCACGGCUCAAUCA3'
|||o|||o||||x|||||||x|
3'GUCUUAGUCGUGAAGAGAACCAGGGUCGACACUGUAAUCGUGACGAGUUACUUCUUCUUCUACUCCUGCUGCUUCUUCGACU5' ( -27.10[68.09%] )
>RC-m0109_5p	|ppa008065m|PACid:17662475	|location[1058,1078]
5'UAGCCAAGGAUGACUUGCCUG3'
||||||||||||xx||||x||
3'AGUAGGAGAGGAACGCGAAGAGUUUCUUAGAUCGGUUCCUACGAAACGCACGAACUCCGUGACCAUGACGACCUUAGUCCA5' ( -27.30[66.42%] )
>RC-m0109_5p	|ppa011476m|PACid:17641245	|location[661,681]
5'UAGCCAAGGAUGACUUGCCUG3'
|||||||||||||xx||xx||
3'GAGUGAAUCAGUUGAGUCGACUCUCACACAAUCGGUUCCUACUAUACCAACUUCCUCUGUGGGGAGAUCAGGGUGGGUUUA5' ( -28.02[68.34%] )
>RC-m0109_5p	|ppa012173m|PACid:17666161	|location[698,718]
5'UAGCCAAGGAUGACUUGCCUG3'
x|||||||o||||x|||||||
3'GUGUUGUGGGUUAUUAAUGUUUUCAUUGGUUUCGGUUCUUACUAAACGGACUAUAUCUGUAACGUGUCGUCCCAAAGUGGG5' ( -30.30[74.26%] )
>RC-m0110_5p	|ppa008065m|PACid:17662475	|location[1058,1078]
5'UAGCCAAGGAUGACUUGCCUG3'
||||||||||||xx||||x||
3'AGUAGGAGAGGAACGCGAAGAGUUUCUUAGAUCGGUUCCUACGAAACGCACGAACUCCGUGACCAUGACGACCUUAGUCCA5' ( -27.30[66.42%] )
>RC-m0110_5p	|ppa011476m|PACid:17641245	|location[661,681]
5'UAGCCAAGGAUGACUUGCCUG3'
|||||||||||||xx||xx||
3'GAGUGAAUCAGUUGAGUCGACUCUCACACAAUCGGUUCCUACUAUACCAACUUCCUCUGUGGGGAGAUCAGGGUGGGUUUA5' ( -28.02[68.34%] )
>RC-m0110_5p	|ppa012173m|PACid:17666161	|location[698,718]
5'UAGCCAAGGAUGACUUGCCUG3'
x|||||||o||||x|||||||
3'GUGUUGUGGGUUAUUAAUGUUUUCAUUGGUUUCGGUUCUUACUAAACGGACUAUAUCUGUAACGUGUCGUCCCAAAGUGGG5' ( -30.30[74.26%] )
>RC-m0111_5p	|ppa000884m|PACid:17650408	|location[2577,2597]
5'UAGGGCUCCUCUUUCUUGGCA3'
||xo||||||||||xx|||||
3'UACUAGAGGGGUUUCGACAUAUGUAGGGACAUAUCGAGGAGAAAACACCGUGAUAACCAUAGUGGACAUAGGGAAAACCUU5' ( -26.80[64.58%] )
>RC-m0111_5p	|ppa004780m|PACid:17645927	|location[1033,1053]
5'UAGGGCUCCUCUUUCUUGGCA3'
|x||x||||||||||||ox||
3'CAAACGAGACGUCAGAGGCGUCGGAAGACGAACCAGAGGAGAAAGAAUGGUCUGUUCAUCAGGUACCGAAAAGCUCGUCGC5' ( -26.00[62.35%] )
>RC-m0111_5p	|ppa005234m|PACid:17651481	|location[80,100]
5'UAGGGCUCCUCUUUCUUGGCA3'
|x||||||||||o|||||x|x
3'UUACUUGGACCUCCCUCCAAUCGGGAAAAGACCCCGAGGAGAGAGAACAGGGAAAAGCACUUUUAAUUUUUACUCUCUUCC5' ( -32.50[77.75%] )
>RC-m0111_5p	|ppa008203m|PACid:17667763	|location[587,607]
5'UAGGGCUCCUCUUUCUUGGCA3'
|x|||||||||oo|x||||||
3'GAAAAAGACGAAAUUCUUCCUGUAGUCAGGACCCCGAGGAGGGAUAACCGUGACGACCCCACAGGAGUAGUGUACCUGGUA5' ( -32.20[77.03%] )
>RC-m0111_5p	|ppa008279m|PACid:17667764	|location[578,598]
5'UAGGGCUCCUCUUUCUUGGCA3'
|x|||||||||oo|x||||||
3'GAAAAAGACGAAAUUCUUCCUGUAGUCAGGACCCCGAGGAGGGAUAACCGUGACGACCCCACAGGAGUAGUGUACCUGGUA5' ( -32.20[77.03%] )
>RC-m0111_5p	|ppa000011m|PACid:17653665	|location[7779,7799]
5'UAGGGCUCCUCUUUCUUGGCA3'
|x|o|||||||||o|||||x|
3'CAACAUUAAGGCACGAGCACAAGUAUUCAAAACUCGAGGAGAAGGAACCCUUCGUUUGAUACUCUACCAUAGACUUCAACG5' ( -32.00[76.56%] )
>RC-m0111_5p	|ppa004529m|PACid:17668351	|location[1418,1438]
5'UAGGGCUCCUCUUUCUUGGCA3'
||x|x||||||o|x|||||||
3'GCAGAUGUAUACCACCUCAUUUGAGAGGUAAUACGGAGGAGGAUGAACCGUAAGGGGUUCCUAAUUUAGGUGGUCUUUUCG5' ( -27.30[65.16%] )
>RC-m0111_5p	|ppa014894m|PACid:17648368	|location[60,80]
5'UAGGGCUCCUCUUUCUUGGCA3'
|x||||||||||||||oxx||
3'AACCUUUGUUACCACCGUUUGUAUCUUUCAAACCCGAGGAGAAAGAGAGGUUAUACAAAUCCUUCUCGUUCGAGUUGUAGA5' ( -30.90[73.92%] )
>RC-m0111_5p	|ppa000438m|PACid:17649984	|location[91,111]
5'UAGGGCUCCUCUUUCUUGGCA3'
o||||||x||||||||x|||x
3'UCCCAAAAGUUCACGCCAGAACUUUCUUUAGUCCCGAAGAGAAAGACCCGAGACGAGUAAAACUAUUUGUUACCGUAACCA5' ( -30.70[73.44%] )
>RC-m0111_5p	|ppa003822m|PACid:17647745	|location[981,1001]
5'UAGGGCUCCUCUUUCUUGGCA3'
||oo||||||||||x|||x||
3'UUUGAACUAAACAUAUACAAGGUAUGGGCUAUUUCGAGGAGAAACAACGGUUGUAAUGGUAUCUCUGAAUUUUCUAUUACU5' ( -25.30[60.82%] )
>RC-m0112_5p	|ppa000884m|PACid:17650408	|location[2577,2597]
5'UAGGGCUCCUCUUUCUUGGCA3'
||xo||||||||||xx|||||
3'UACUAGAGGGGUUUCGACAUAUGUAGGGACAUAUCGAGGAGAAAACACCGUGAUAACCAUAGUGGACAUAGGGAAAACCUU5' ( -26.80[64.58%] )
>RC-m0112_5p	|ppa004780m|PACid:17645927	|location[1033,1053]
5'UAGGGCUCCUCUUUCUUGGCA3'
|x||x||||||||||||ox||
3'CAAACGAGACGUCAGAGGCGUCGGAAGACGAACCAGAGGAGAAAGAAUGGUCUGUUCAUCAGGUACCGAAAAGCUCGUCGC5' ( -26.00[62.35%] )
>RC-m0112_5p	|ppa005234m|PACid:17651481	|location[80,100]
5'UAGGGCUCCUCUUUCUUGGCA3'
|x||||||||||o|||||x|x
3'UUACUUGGACCUCCCUCCAAUCGGGAAAAGACCCCGAGGAGAGAGAACAGGGAAAAGCACUUUUAAUUUUUACUCUCUUCC5' ( -32.50[77.75%] )
>RC-m0112_5p	|ppa008203m|PACid:17667763	|location[587,607]
5'UAGGGCUCCUCUUUCUUGGCA3'
|x|||||||||oo|x||||||
3'GAAAAAGACGAAAUUCUUCCUGUAGUCAGGACCCCGAGGAGGGAUAACCGUGACGACCCCACAGGAGUAGUGUACCUGGUA5' ( -32.20[77.03%] )
>RC-m0112_5p	|ppa008279m|PACid:17667764	|location[578,598]
5'UAGGGCUCCUCUUUCUUGGCA3'
|x|||||||||oo|x||||||
3'GAAAAAGACGAAAUUCUUCCUGUAGUCAGGACCCCGAGGAGGGAUAACCGUGACGACCCCACAGGAGUAGUGUACCUGGUA5' ( -32.20[77.03%] )
>RC-m0112_5p	|ppa000011m|PACid:17653665	|location[7779,7799]
5'UAGGGCUCCUCUUUCUUGGCA3'
|x|o|||||||||o|||||x|
3'CAACAUUAAGGCACGAGCACAAGUAUUCAAAACUCGAGGAGAAGGAACCCUUCGUUUGAUACUCUACCAUAGACUUCAACG5' ( -32.00[76.56%] )
>RC-m0112_5p	|ppa004529m|PACid:17668351	|location[1418,1438]
5'UAGGGCUCCUCUUUCUUGGCA3'
||x|x||||||o|x|||||||
3'GCAGAUGUAUACCACCUCAUUUGAGAGGUAAUACGGAGGAGGAUGAACCGUAAGGGGUUCCUAAUUUAGGUGGUCUUUUCG5' ( -27.30[65.16%] )
>RC-m0112_5p	|ppa014894m|PACid:17648368	|location[60,80]
5'UAGGGCUCCUCUUUCUUGGCA3'
|x||||||||||||||oxx||
3'AACCUUUGUUACCACCGUUUGUAUCUUUCAAACCCGAGGAGAAAGAGAGGUUAUACAAAUCCUUCUCGUUCGAGUUGUAGA5' ( -30.90[73.92%] )
>RC-m0112_5p	|ppa000438m|PACid:17649984	|location[91,111]
5'UAGGGCUCCUCUUUCUUGGCA3'
o||||||x||||||||x|||x
3'UCCCAAAAGUUCACGCCAGAACUUUCUUUAGUCCCGAAGAGAAAGACCCGAGACGAGUAAAACUAUUUGUUACCGUAACCA5' ( -30.70[73.44%] )
>RC-m0112_5p	|ppa003822m|PACid:17647745	|location[981,1001]
5'UAGGGCUCCUCUUUCUUGGCA3'
||oo||||||||||x|||x||
3'UUUGAACUAAACAUAUACAAGGUAUGGGCUAUUUCGAGGAGAAACAACGGUUGUAAUGGUAUCUCUGAAUUUUCUAUUACU5' ( -25.30[60.82%] )
>RC-m0113_5p	|ppa000884m|PACid:17650408	|location[2577,2597]
5'UAGGGCUCCUCUUUCUUGGCA3'
||xo||||||||||xx|||||
3'UACUAGAGGGGUUUCGACAUAUGUAGGGACAUAUCGAGGAGAAAACACCGUGAUAACCAUAGUGGACAUAGGGAAAACCUU5' ( -26.80[64.58%] )
>RC-m0113_5p	|ppa004780m|PACid:17645927	|location[1033,1053]
5'UAGGGCUCCUCUUUCUUGGCA3'
|x||x||||||||||||ox||
3'CAAACGAGACGUCAGAGGCGUCGGAAGACGAACCAGAGGAGAAAGAAUGGUCUGUUCAUCAGGUACCGAAAAGCUCGUCGC5' ( -26.00[62.35%] )
>RC-m0113_5p	|ppa005234m|PACid:17651481	|location[80,100]
5'UAGGGCUCCUCUUUCUUGGCA3'
|x||||||||||o|||||x|x
3'UUACUUGGACCUCCCUCCAAUCGGGAAAAGACCCCGAGGAGAGAGAACAGGGAAAAGCACUUUUAAUUUUUACUCUCUUCC5' ( -32.50[77.75%] )
>RC-m0113_5p	|ppa008203m|PACid:17667763	|location[587,607]
5'UAGGGCUCCUCUUUCUUGGCA3'
|x|||||||||oo|x||||||
3'GAAAAAGACGAAAUUCUUCCUGUAGUCAGGACCCCGAGGAGGGAUAACCGUGACGACCCCACAGGAGUAGUGUACCUGGUA5' ( -32.20[77.03%] )
>RC-m0113_5p	|ppa008279m|PACid:17667764	|location[578,598]
5'UAGGGCUCCUCUUUCUUGGCA3'
|x|||||||||oo|x||||||
3'GAAAAAGACGAAAUUCUUCCUGUAGUCAGGACCCCGAGGAGGGAUAACCGUGACGACCCCACAGGAGUAGUGUACCUGGUA5' ( -32.20[77.03%] )
>RC-m0113_5p	|ppa000011m|PACid:17653665	|location[7779,7799]
5'UAGGGCUCCUCUUUCUUGGCA3'
|x|o|||||||||o|||||x|
3'CAACAUUAAGGCACGAGCACAAGUAUUCAAAACUCGAGGAGAAGGAACCCUUCGUUUGAUACUCUACCAUAGACUUCAACG5' ( -32.00[76.56%] )
>RC-m0113_5p	|ppa004529m|PACid:17668351	|location[1418,1438]
5'UAGGGCUCCUCUUUCUUGGCA3'
||x|x||||||o|x|||||||
3'GCAGAUGUAUACCACCUCAUUUGAGAGGUAAUACGGAGGAGGAUGAACCGUAAGGGGUUCCUAAUUUAGGUGGUCUUUUCG5' ( -27.30[65.16%] )
>RC-m0113_5p	|ppa014894m|PACid:17648368	|location[60,80]
5'UAGGGCUCCUCUUUCUUGGCA3'
|x||||||||||||||oxx||
3'AACCUUUGUUACCACCGUUUGUAUCUUUCAAACCCGAGGAGAAAGAGAGGUUAUACAAAUCCUUCUCGUUCGAGUUGUAGA5' ( -30.90[73.92%] )
>RC-m0113_5p	|ppa000438m|PACid:17649984	|location[91,111]
5'UAGGGCUCCUCUUUCUUGGCA3'
o||||||x||||||||x|||x
3'UCCCAAAAGUUCACGCCAGAACUUUCUUUAGUCCCGAAGAGAAAGACCCGAGACGAGUAAAACUAUUUGUUACCGUAACCA5' ( -30.70[73.44%] )
>RC-m0113_5p	|ppa003822m|PACid:17647745	|location[981,1001]
5'UAGGGCUCCUCUUUCUUGGCA3'
||oo||||||||||x|||x||
3'UUUGAACUAAACAUAUACAAGGUAUGGGCUAUUUCGAGGAGAAACAACGGUUGUAAUGGUAUCUCUGAAUUUUCUAUUACU5' ( -25.30[60.82%] )
>RC-m0114_5p	|ppa000884m|PACid:17650408	|location[2577,2597]
5'UAGGGCUCCUCUUUCUUGGCA3'
||xo||||||||||xx|||||
3'UACUAGAGGGGUUUCGACAUAUGUAGGGACAUAUCGAGGAGAAAACACCGUGAUAACCAUAGUGGACAUAGGGAAAACCUU5' ( -26.80[64.58%] )
>RC-m0114_5p	|ppa004780m|PACid:17645927	|location[1033,1053]
5'UAGGGCUCCUCUUUCUUGGCA3'
|x||x||||||||||||ox||
3'CAAACGAGACGUCAGAGGCGUCGGAAGACGAACCAGAGGAGAAAGAAUGGUCUGUUCAUCAGGUACCGAAAAGCUCGUCGC5' ( -26.00[62.35%] )
>RC-m0114_5p	|ppa005234m|PACid:17651481	|location[80,100]
5'UAGGGCUCCUCUUUCUUGGCA3'
|x||||||||||o|||||x|x
3'UUACUUGGACCUCCCUCCAAUCGGGAAAAGACCCCGAGGAGAGAGAACAGGGAAAAGCACUUUUAAUUUUUACUCUCUUCC5' ( -32.50[77.75%] )
>RC-m0114_5p	|ppa008203m|PACid:17667763	|location[587,607]
5'UAGGGCUCCUCUUUCUUGGCA3'
|x|||||||||oo|x||||||
3'GAAAAAGACGAAAUUCUUCCUGUAGUCAGGACCCCGAGGAGGGAUAACCGUGACGACCCCACAGGAGUAGUGUACCUGGUA5' ( -32.20[77.03%] )
>RC-m0114_5p	|ppa008279m|PACid:17667764	|location[578,598]
5'UAGGGCUCCUCUUUCUUGGCA3'
|x|||||||||oo|x||||||
3'GAAAAAGACGAAAUUCUUCCUGUAGUCAGGACCCCGAGGAGGGAUAACCGUGACGACCCCACAGGAGUAGUGUACCUGGUA5' ( -32.20[77.03%] )
>RC-m0114_5p	|ppa000011m|PACid:17653665	|location[7779,7799]
5'UAGGGCUCCUCUUUCUUGGCA3'
|x|o|||||||||o|||||x|
3'CAACAUUAAGGCACGAGCACAAGUAUUCAAAACUCGAGGAGAAGGAACCCUUCGUUUGAUACUCUACCAUAGACUUCAACG5' ( -32.00[76.56%] )
>RC-m0114_5p	|ppa004529m|PACid:17668351	|location[1418,1438]
5'UAGGGCUCCUCUUUCUUGGCA3'
||x|x||||||o|x|||||||
3'GCAGAUGUAUACCACCUCAUUUGAGAGGUAAUACGGAGGAGGAUGAACCGUAAGGGGUUCCUAAUUUAGGUGGUCUUUUCG5' ( -27.30[65.16%] )
>RC-m0114_5p	|ppa014894m|PACid:17648368	|location[60,80]
5'UAGGGCUCCUCUUUCUUGGCA3'
|x||||||||||||||oxx||
3'AACCUUUGUUACCACCGUUUGUAUCUUUCAAACCCGAGGAGAAAGAGAGGUUAUACAAAUCCUUCUCGUUCGAGUUGUAGA5' ( -30.90[73.92%] )
>RC-m0114_5p	|ppa000438m|PACid:17649984	|location[91,111]
5'UAGGGCUCCUCUUUCUUGGCA3'
o||||||x||||||||x|||x
3'UCCCAAAAGUUCACGCCAGAACUUUCUUUAGUCCCGAAGAGAAAGACCCGAGACGAGUAAAACUAUUUGUUACCGUAACCA5' ( -30.70[73.44%] )
>RC-m0114_5p	|ppa003822m|PACid:17647745	|location[981,1001]
5'UAGGGCUCCUCUUUCUUGGCA3'
||oo||||||||||x|||x||
3'UUUGAACUAAACAUAUACAAGGUAUGGGCUAUUUCGAGGAGAAACAACGGUUGUAAUGGUAUCUCUGAAUUUUCUAUUACU5' ( -25.30[60.82%] )
>RC-m0117_5p	|ppa000884m|PACid:17650408	|location[2577,2597]
5'UAGGGCUCCUCUUUCUUGGCA3'
||xo||||||||||xx|||||
3'UACUAGAGGGGUUUCGACAUAUGUAGGGACAUAUCGAGGAGAAAACACCGUGAUAACCAUAGUGGACAUAGGGAAAACCUU5' ( -26.80[64.58%] )
>RC-m0117_5p	|ppa004780m|PACid:17645927	|location[1033,1053]
5'UAGGGCUCCUCUUUCUUGGCA3'
|x||x||||||||||||ox||
3'CAAACGAGACGUCAGAGGCGUCGGAAGACGAACCAGAGGAGAAAGAAUGGUCUGUUCAUCAGGUACCGAAAAGCUCGUCGC5' ( -26.00[62.35%] )
>RC-m0117_5p	|ppa005234m|PACid:17651481	|location[80,100]
5'UAGGGCUCCUCUUUCUUGGCA3'
|x||||||||||o|||||x|x
3'UUACUUGGACCUCCCUCCAAUCGGGAAAAGACCCCGAGGAGAGAGAACAGGGAAAAGCACUUUUAAUUUUUACUCUCUUCC5' ( -32.50[77.75%] )
>RC-m0117_5p	|ppa008203m|PACid:17667763	|location[587,607]
5'UAGGGCUCCUCUUUCUUGGCA3'
|x|||||||||oo|x||||||
3'GAAAAAGACGAAAUUCUUCCUGUAGUCAGGACCCCGAGGAGGGAUAACCGUGACGACCCCACAGGAGUAGUGUACCUGGUA5' ( -32.20[77.03%] )
>RC-m0117_5p	|ppa008279m|PACid:17667764	|location[578,598]
5'UAGGGCUCCUCUUUCUUGGCA3'
|x|||||||||oo|x||||||
3'GAAAAAGACGAAAUUCUUCCUGUAGUCAGGACCCCGAGGAGGGAUAACCGUGACGACCCCACAGGAGUAGUGUACCUGGUA5' ( -32.20[77.03%] )
>RC-m0117_5p	|ppa000011m|PACid:17653665	|location[7779,7799]
5'UAGGGCUCCUCUUUCUUGGCA3'
|x|o|||||||||o|||||x|
3'CAACAUUAAGGCACGAGCACAAGUAUUCAAAACUCGAGGAGAAGGAACCCUUCGUUUGAUACUCUACCAUAGACUUCAACG5' ( -32.00[76.56%] )
>RC-m0117_5p	|ppa004529m|PACid:17668351	|location[1418,1438]
5'UAGGGCUCCUCUUUCUUGGCA3'
||x|x||||||o|x|||||||
3'GCAGAUGUAUACCACCUCAUUUGAGAGGUAAUACGGAGGAGGAUGAACCGUAAGGGGUUCCUAAUUUAGGUGGUCUUUUCG5' ( -27.30[65.16%] )
>RC-m0117_5p	|ppa014894m|PACid:17648368	|location[60,80]
5'UAGGGCUCCUCUUUCUUGGCA3'
|x||||||||||||||oxx||
3'AACCUUUGUUACCACCGUUUGUAUCUUUCAAACCCGAGGAGAAAGAGAGGUUAUACAAAUCCUUCUCGUUCGAGUUGUAGA5' ( -30.90[73.92%] )
>RC-m0117_5p	|ppa000438m|PACid:17649984	|location[91,111]
5'UAGGGCUCCUCUUUCUUGGCA3'
o||||||x||||||||x|||x
3'UCCCAAAAGUUCACGCCAGAACUUUCUUUAGUCCCGAAGAGAAAGACCCGAGACGAGUAAAACUAUUUGUUACCGUAACCA5' ( -30.70[73.44%] )
>RC-m0117_5p	|ppa003822m|PACid:17647745	|location[981,1001]
5'UAGGGCUCCUCUUUCUUGGCA3'
||oo||||||||||x|||x||
3'UUUGAACUAAACAUAUACAAGGUAUGGGCUAUUUCGAGGAGAAACAACGGUUGUAAUGGUAUCUCUGAAUUUUCUAUUACU5' ( -25.30[60.82%] )
>RC-m0118_5p	|ppa005975m|PACid:17652402	|location[261,281]
5'GAGGAUGGAAGGGAGGAGUAA3'
x||||||||||o||||x||x|
3'CUAGUUGAAGACCAUUGUUCAAAUGUACUAAUCCUACCUUCUCUCCACACUCUCUCGCCAACUCCUAGGGGACGUUUCAAA5' ( -29.90[70.19%] )
>RC-m0118_5p	|ppa020226m|PACid:17651044	|location[947,967]
5'GAGGAUGGAAGGGAGGAGUAA3'
||o|x|||||||x||||||x|
3'UCUGUCACGACUGCAGGUGUGCCGAAGAUACUUCGACCUUCCGUCCUCACUAGGUUGAGGGCGUUGACGUAACCGACGGAC5' ( -29.30[68.46%] )
>RC-m0118_5p	|ppa025037m|PACid:17668760	|location[109,129]
5'GAGGAUGGAAGGGAGGAGUAA3'
||||||||x|||||||xox||
3'AAAAACCAUCAUCUACGCCGGCUCCUCGGACUCCUACCCUCCCUCCGUCUUCUCCAGCAUCCGCAGCCUCUUCUCCGGGUA5' ( -31.10[73.00%] )
>RC-m0118_5p	|ppa018370m|PACid:17648184	|location[166,186]
5'GAGGAUGGAAGGGAGGAGUAA3'
||x||||||||||||o|xx||
3'CACUACCCUGUAACGCAUCCUCGUACGAAACUACUACCUUCCCUCUUAUUUCCUCAAACGUACCUCCGGUUUCCCUACCUC5' ( -27.70[65.02%] )
>RC-m0118_5p	|ppa025373m|PACid:17646745	|location[142,162]
5'GAGGAUGGAAGGGAGGAGUAA3'
|||||||x|||||||o||x|x
3'CUCUCCUUAAUAUACAUUGGACACCUUCUACUCCUACAUUCCCUCUUCUUACUCCCGCCUCUCCCGUAACCACAUCUGCUG5' ( -29.60[69.48%] )
>RC-m0118_5p	|ppa008637m|PACid:17654844	|location[902,922]
5'GAGGAUGGAAGGGAGGAGUAA3'
||o|||||x|||o|||||||x
3'UGUUAGACGGCAGGUCCCGAACCUCCUCAUCUUCUACCGUCCUUCCUCAUAACGACGGGCGGGGUGGGACCCGCUCGUCUG5' ( -32.20[76.12%] )
>RC-m0118_5p	|ppa005139m|PACid:17657949	|location[121,141]
5'GAGGAUGGAAGGGAGGAGUAA3'
|x|o||||||||||x|||||x
3'GUCGCCUUCUUUCAUCUCCCCCUGUCCCUGCCCUUACCUUCCCUACUCAUCCCCAUUUUCACCUUUCGGCCCCUGAAAGAG5' ( -28.30[66.43%] )
>RC-m0118_5p	|ppa006966m|PACid:17645483	|location[846,866]
5'GAGGAUGGAAGGGAGGAGUAA3'
||||||o|||||x||||xo||
3'UCUUUAUUAGUAGUGUGGUAAAGAACUUGGCUCCUAUCUUCCAUCCUAGUUUAAACAGCGUUCGUGAAAAGACCUGAACUA5' ( -28.00[65.57%] )
>RC-m0118_5p	|ppa026830m|PACid:17650983	|location[10,30]
5'GAGGAUGGAAGGGAGGAGUAA3'
||||||||x||o||||||x|x
3'CAUCUUCUUCUUCUCCUCUUCCUCCUCCCACUCCUACCCUCUCUCCUCCUAACCCACGUA5' ( -32.10[75.00%] )
>RC-m0118_5p	|ppa003327m|PACid:17640929	|location[102,122]
5'GAGGAUGGAAGGGAGGAGUAA3'
|||ox||||||||||||||x|
3'CUAACUCCUCCUCAACCUCUCGAACCCCCUCUCUCACCUUCCCUCCUCACUCUCUCUCGAUAAGUGCCGGUAAUUCUCUCU5' ( -34.90[82.90%] )
>RC-m0118_5p	|ppa005009m|PACid:17660562	|location[6,26]
5'GAGGAUGGAAGGGAGGAGUAA3'
o||x|x|||||||||||||||
3'CUCUACACACUCCCCUGCACUUCUUUCCAUUUCGUCCCUUCCCUCCUCAUUUAUUC5' ( -31.02[73.51%] )
>RC-m0118_5p	|ppa021891m|PACid:17641082	|location[1825,1845]
5'GAGGAUGGAAGGGAGGAGUAA3'
|x||||||x|||o|||||x||
3'CGGCUCCAGCGCCUCCCUCUCCACCUCCAACGCCUACCGUCCUUCCUCCUUCCACCUCUUCAGCCCCCUUCUAAGAUCUCC5' ( -27.90[65.49%] )
>RC-m0123_3p	|ppa015742m|PACid:17655181	|location[161,181]
5'AUAAGGUGGUAUGAAAAUGUG3'
xo||x|||||||o||||||||
3'GACAAUGGCUGUGCUAGCGCCGAACUCAUGGGUUACACCAUAUUUUUACACCACUCGGAUCGUAAUGGGAUAACAGUGUGU5' ( -22.60[70.63%] )
>RC-m0124_3p	|ppa014500m|PACid:17642168	|location[42,62]
5'UCUUAGUUGGCAUCAGGGGAG3'
||||||o|o||x|||o|||||
3'CUGUGUAUAUCGGGAUCCCAAAGUGAUACGAGAAUCGAUCGGAGUUCCCUCAUUCUUAGAAGUUAUAAAUUUAGACUUUGC5' ( -32.30[77.64%] )
>RC-m0126_5p	|ppa008953m|PACid:17642768	|location[644,665]
5'UGAUAUUGGCACGGCUCAAUCA3'
|||o|||o||||x|||||||x|
3'GUCUUAGUCGUGAAGAGAACCAGGGUCGACACUGUAAUCGUGACGAGUUACUUCUUCUUCUACUCCUGCUGCUUCUUCGACU5' ( -27.10[68.09%] )
>RC-m0126_5p	|ppa008961m|PACid:17642769	|location[644,665]
5'UGAUAUUGGCACGGCUCAAUCA3'
|||o|||o||||x|||||||x|
3'GUCUUAGUCGUGAAGAGAACCAGGGUCGACACUGUAAUCGUGACGAGUUACUUCUUCUUCUACUCCUGCUGCUUCUUCGACU5' ( -27.10[68.09%] )
>RC-m0127_3p	|ppa012437m|PACid:17648072	|location[161,180]
5'AAAGACUAAAAUACCCUUGA3'
|||||||||||xxx|||||x
3'ACGCCUCUAACUUCUCCUCCACCUCCACCUUUUCUGAUUUUCCAGGAACAAUGACGCCAACCCUCGUAGCAGAUCCUCGU5' ( -17.40[60.84%] )
>RC-m0127_3p	|ppa013211m|PACid:17655878	|location[447,466]
5'AAAGACUAAAAUACCCUUGA3'
|x|||||x|||||||||oo|
3'UGAAAUUUUUGAUCGGUUUUUGAGUCAAUUUAUCUGAGUUUAUGGGAGUUAUAAAUUUGAGUGUAUUUUGGAUUCUUCCU5' ( -21.30[74.48%] )
>RC-m0127_3p	|ppa017834m|PACid:17641445	|location[71,90]
5'AAAGACUAAAAUACCCUUGA3'
||||||||||||||||||o|
3'GAAGUGGUGGGAGUGUUUGGAUCUUUUAUCUUUCUGAUUUUAUGGGAAUUUUAUAUACCUUUUAACUUACCACAAUUUCA5' ( -26.30[92.28%] )
>RC-m0128_3p	|ppa012437m|PACid:17648072	|location[161,180]
5'AAAGACUAAAAUACCCUUGA3'
|||||||||||xxx|||||x
3'ACGCCUCUAACUUCUCCUCCACCUCCACCUUUUCUGAUUUUCCAGGAACAAUGACGCCAACCCUCGUAGCAGAUCCUCGU5' ( -17.40[60.84%] )
>RC-m0128_3p	|ppa013211m|PACid:17655878	|location[447,466]
5'AAAGACUAAAAUACCCUUGA3'
|x|||||x|||||||||oo|
3'UGAAAUUUUUGAUCGGUUUUUGAGUCAAUUUAUCUGAGUUUAUGGGAGUUAUAAAUUUGAGUGUAUUUUGGAUUCUUCCU5' ( -21.30[74.48%] )
>RC-m0128_3p	|ppa017834m|PACid:17641445	|location[71,90]
5'AAAGACUAAAAUACCCUUGA3'
||||||||||||||||||o|
3'GAAGUGGUGGGAGUGUUUGGAUCUUUUAUCUUUCUGAUUUUAUGGGAAUUUUAUAUACCUUUUAACUUACCACAAUUUCA5' ( -26.30[92.28%] )
>RC-m0131_5p	|ppa006634m|PACid:17655522	|location[1241,1261]
5'CAGCCAAGGAUGACUUGCCGG3'
x|||||||o||||x||||||x
3'GGUAAGUAGAUACGGUGUUCGUGUUCUUGUUUCGGUUCUUACUUAACGGCGGACCGUUUGUGUAACGGUUUCUAUAUUGGU5' ( -30.00[68.65%] )
>RC-m0131_5p	|ppa012173m|PACid:17666161	|location[698,718]
5'CAGCCAAGGAUGACUUGCCGG3'
x|||||||o||||x|||||x|
3'GUGUUGUGGGUUAUUAAUGUUUUCAUUGGUUUCGGUUCUUACUAAACGGACUAUAUCUGUAACGUGUCGUCCCAAAGUGGG5' ( -28.00[64.22%] )
>RC-m0132_5p	|ppa017338m|PACid:17640854	|location[3372,3394]
5'UUCUGUCGUAGGAGAGAUGGCGC3'
||||xox||||||||||||x|||
3'UAUAGUUAGAGGGGUCCAAUAUAGAGCCUGAAGAGGUCAUCCUCUCUACGGCGAAGGUAUCCGUACGAAACUUAACGAGGGUA5' ( -32.50[69.30%] )
>RC-m0133_3p	|ppa001561m|PACid:17644415	|location[1826,1847]
5'UGAUUGAGCCGUGCCAAUAUCA3'
|||||||||||o|||||||||x
3'ACUUCCCCGAAAGGUUGUCCCCUUUCGACCACUAACUCGGCGCGGUUAUAGGGAACGCGCACACUUUUCAAGGGUCAGGGAU5' ( -39.30[98.74%] )
>RC-m0133_3p	|ppa016845m|PACid:17663724	|location[90,111]
5'UGAUUGAGCCGUGCCAAUAUCA3'
|||||||xx||||||||||x|x
3'AACCAUGUGUGCGUUGGUUUUACUCAGCAAACUAACUAAGCACGGUUAUCGGGGUAGAAGUUUCUGUCUUUGGGUGGGAGAC5' ( -26.20[65.34%] )
>RC-m0133_3p	|ppa000996m|PACid:17657769	|location[1714,1735]
5'UGAUUGAGCCGUGCCAAUAUCA3'
|||||xx|||||||||xx||||
3'GGGUCAGAAAAGUUGUAUGAAUUCUUUGACACUAAAACGGCACGGUCCUAGUGGAUCCUCUUCAUGUAAAUAUAGGGGAGCC5' ( -26.60[66.83%] )
>RC-m0133_3p	|ppa001824m|PACid:17642564	|location[1755,1776]
5'UGAUUGAGCCGUGCCAAUAUCA3'
||x|ox|||||||||||x||||
3'UCAUAAAAGGAGUCAAACUAGACGGGGCUUACGAGAUCGGCACGGUUUUAGUCUAUAAAAACCUAAGUAUAGAAAUAGAUCG5' ( -26.79[67.31%] )
>RC-m0133_3p	|ppa001781m|PACid:17656366	|location[1277,1298]
5'UGAUUGAGCCGUGCCAAUAUCA3'
|||||||||||o|||||||||x
3'ACUUUUCCGAAUGGUUGCCCUCUCUCGACCACUAACUCGGCGCGGUUAUAGGGAACGCGCUCACGGCCUAAAGGACAAAGCU5' ( -39.30[98.74%] )
>RC-m0135_3p	|ppa000092m|PACid:17654523	|location[925,945]
5'UGCCAAAGGAGAAUUGCCCUG3'
|||x|x|||||||||||||oo
3'UUAAAGUGUUGAGAGUAGUCUUAACAGUGAACGAUGUCCUCUUAACGGGGUUUGUUAAGGAAGAAGGGUCAGAUCAACUAG5' ( -29.90[73.83%] )
>RC-m0135_3p	|ppa004552m|PACid:17655549	|location[324,344]
5'UGCCAAAGGAGAAUUGCCCUG3'
||||x|x||||||o|x|||||
3'GUUGUUGGACCCGUCCGUUAACUUCUAGUUACGGCUCCCUCUUGAAGGGACCAAAGCCUAGCAGUUGACGACGGGUCCUAC5' ( -25.90[63.95%] )
>RC-m0135_3p	|ppa013353m|PACid:17660967	|location[454,474]
5'UGCCAAAGGAGAAUUGCCCUG3'
x||||||ox||||||||x|||
3'GUGUCGGGUCUAAUGUACAAUCGGUUUGUUCCGGUUUUGUCUUAACGAGACGUGAAUGGUUCAGGGGGUGAUACGUUUAGA5' ( -25.30[62.62%] )
>RC-m0135_3p	|ppa024435m|PACid:17650881	|location[248,268]
5'UGCCAAAGGAGAAUUGCCCUG3'
xo||||||o|||x||||||||
3'GAAAGAAAGAAGGGUUAAACAGUGGUUCGGUUGGUUUCUUCUGAACGGGACGGUUACACGGUGUUUCACGGUGUGGUAACU5' ( -30.50[75.12%] )
>RC-m0135_3p	|ppa025234m|PACid:17662545	|location[248,268]
5'UGCCAAAGGAGAAUUGCCCUG3'
x|||||||o|||x||||||||
3'GAAAAAAGGAUGGUUCAAAUAGAGGUUCGGUCGGUUUCUUCUCAACGGGACGAUCCCAAGGUUUGUUUCGUUGGGGUCAAU5' ( -32.80[80.79%] )
>RC-m0136_5p	|ppa002870m|PACid:17648451	|location[1276,1298]
5'UCUAAACUAAAAGGGAUGUGGAU3'
|||||||||||x|o||||xo|||
3'UAAAAACCCUUAAGAUCGAAUCCAAGGUGAAGAUUUGAUUUACUCUACCUCUAGACAAGCAAUUGUAGAUGUACCCUUUAGUU5' ( -24.30[64.97%] )
>RC-m0136_5p	|ppa009144m|PACid:17658837	|location[410,432]
5'UCUAAACUAAAAGGGAUGUGGAU3'
|||||||||||||xx||||xx||
3'CGUGUUCCCUACUCUGAGUAACCUUUAUUAAGAUUUGAUUUUCAAUACAAAUACCUUGGUAGGUUACGCGAGAAUACUAUACG5' ( -22.40[60.05%] )
>RC-m0137_5p	|ppa003136m|PACid:17643333	|location[1335,1355]
5'UGCCUGGCUCCCUGUAUGCCA3'
||||||||||||||o||||||
3'ACCCUAUCUAAUCUAUGUGUCAUAUCUAGAACGGACCGAGGGACGUACGGUCGUCCUUUUCACAAUAUCAAGUUGUUCCUA5' ( -46.30[100.00%] )
>RC-m0137_5p	|ppa002082m|PACid:17645207	|location[1344,1364]
5'UGCCUGGCUCCCUGUAUGCCA3'
||||||||||||||||||||x
3'UCUAGACUAUUUCUAUAAGAUUUAACUCGUACGGACCGAGGGACAUACGGACGUCCUCACAACAGUCCAUCUGUUGUGUUC5' ( -46.30[100%] )
>RC-m0137_5p	|ppa002195m|PACid:17653376	|location[1580,1600]
5'UGCCUGGCUCCCUGUAUGCCA3'
||||||||||||||o||||||
3'UAUAGACUAUUCCUAUCUGGUAUUACUGGUACGGACCGAGGGACGUACGGUCGUCCUCAAAACAGCCCGUCUGUUGGUUUU5' ( -46.10[100.00%] )
>RC-m0137_5p	|ppa002691m|PACid:17640912	|location[2583,2603]
5'UGCCUGGCUCCCUGUAUGCCA3'
||||||x|||||||ox|||x|
3'UAAAUCCACGUUUUGUUAUAGGUCAUUUGGACGGACGGAGGGACGGACGAUCAACCCGUGUUCAGCCCGUUUUGACCAGAG5' ( -33.90[73.22%] )
>RC-m0137_5p	|ppa002710m|PACid:17657536	|location[1272,1292]
5'UGCCUGGCUCCCUGUAUGCCA3'
||||||||||||||||||||x
3'UGUAGGCUACUUCUAUCAAGUUUAACUCGAACGGACCGAGGGACAUACGGGCGACUAUAAAACAGACUAUGUGAUGUAUUC5' ( -46.30[100.00%] )
>RC-m0139_3p	|ppa019670m|PACid:17649830	|location[266,286]
5'CCAACGUCUGGCUUUUGGUGA3'
||||x||||||xxo|||||||
3'CUUCUGGUCACUAAAACAACAACGAUUCCAGGUUUCAGACCUCGAACCACUCGAAAGGUUAUCACCAUAGUCCCUAUCUUG5' ( -25.90[64.91%] )
>RC-m0139_3p	|ppa002944m|PACid:17662501	|location[1081,1101]
5'CCAACGUCUGGCUUUUGGUGA3'
|||x|x||||||||o||x|||
3'GAGGUCUGUUUGUAUACUUCUAGGAAUGGUGGUAGGAGACCGAAGACGACUCGAACGGGUAAUCCGGAGAAACGUAAUUAC5' ( -27.20[69.04%] )
>RC-m0141_5p	|ppa008065m|PACid:17662475	|location[1058,1078]
5'UAGCCAAGGAUGACUUGCCUG3'
||||||||||||xx||||x||
3'AGUAGGAGAGGAACGCGAAGAGUUUCUUAGAUCGGUUCCUACGAAACGCACGAACUCCGUGACCAUGACGACCUUAGUCCA5' ( -27.30[66.42%] )
>RC-m0141_5p	|ppa011476m|PACid:17641245	|location[661,681]
5'UAGCCAAGGAUGACUUGCCUG3'
|||||||||||||xx||xx||
3'GAGUGAAUCAGUUGAGUCGACUCUCACACAAUCGGUUCCUACUAUACCAACUUCCUCUGUGGGGAGAUCAGGGUGGGUUUA5' ( -28.02[68.34%] )
>RC-m0141_5p	|ppa012173m|PACid:17666161	|location[698,718]
5'UAGCCAAGGAUGACUUGCCUG3'
x|||||||o||||x|||||||
3'GUGUUGUGGGUUAUUAAUGUUUUCAUUGGUUUCGGUUCUUACUAAACGGACUAUAUCUGUAACGUGUCGUCCCAAAGUGGG5' ( -30.30[74.26%] )
>RC-m0144_3p	|ppa020036m|PACid:17655625	|location[893,913]
5'UAAGAGAUAGGGCCUCACCUA3'
o||||||x|||||x|||||x|
3'ACCUUUCAUAAUAUCGAGGUUGUUGUGAGGGUUCUCUCUCCCGUAGUGGUUCCUUAUACUGUGACUUUCGUCGUCGUUACC5' ( -27.60[68.49%] )
>RC-m0145_3p	|ppa007128m|PACid:17666929	|location[569,589]
5'UAGAGAGAUGGUCAGCAAUGU3'
x|o||||||||||||x||||x
3'GAAAAAGAGCUCGUACAGAGUAUUCUACUUCUUUCUCUACCAGUCUUUACUUCGCUCUGCGCAGUCCAGGUGGUACGGGUA5' ( -25.60[68.09%] )
>RC-m0145_3p	|ppa008085m|PACid:17652272	|location[74,94]
5'UAGAGAGAUGGUCAGCAAUGU3'
x|||||o|||||||x||||||
3'GGACCUAGUUUCCGAGUCUUCCCAUUCUACCUCUCUUUACCAGUAGUUACAACUACAACAAUCCUCACAUCCCGUUCUUUU5' ( -26.90[71.54%] )
>RC-m0145_3p	|ppa004550m|PACid:17669027	|location[1189,1209]
5'UAGAGAGAUGGUCAGCAAUGU3'
x|x||||||||o||||||||x
3'ACUCUCAUAUCCAACUUACGGUAAGUUCUUUUGUCUCUACCGGUCGUUACCCCAAUUUAGUCUAUGACGGCGCUAUUGCUG5' ( -30.70[81.43%] )
>RC-m0145_3p	|ppa004566m|PACid:17653878	|location[1189,1209]
5'UAGAGAGAUGGUCAGCAAUGU3'
x|x||||||||o||||||||x
3'ACUCUCAUAUCCAACUUACGGUAAGUUCUUUUGUCUCUACCGGUCGUUACCCCAAUUUAGUCUAUGACGACGCUAUUGAUG5' ( -30.70[81.43%] )
>RC-m0145_3p	|ppa006338m|PACid:17664200	|location[1004,1024]
5'UAGAGAGAUGGUCAGCAAUGU3'
||o||||x||||||||||x||
3'GUAAGGUUUGUAGUGUUUACAUCGAGAGUAAUUUCUCGACCAGUCGUUUCAUACCGGUCGUGUCCUUUCCUUGGGGUGACG5' ( -26.30[69.58%] )
>RC-m0145_3p	|ppa000722m|PACid:17667848	|location[392,412]
5'UAGAGAGAUGGUCAGCAAUGU3'
o||x|||||||o|||||||||
3'CUCGUCGUAGUCAGUUCUCGGGGUAAAGCUGUCCCUCUACCGGUCGUUACAGCCGUACCAAGUCCAGGUUUGGCCGGUGUU5' ( -32.10[84.92%] )
>RC-m0145_3p	|ppa003400m|PACid:17663891	|location[605,625]
5'UAGAGAGAUGGUCAGCAAUGU3'
ox|||||||||||x|||||x|
3'GAACUCGUACUGGUCCCGUAACGAGUGCACGACUCUCUACCAGACGUUAGACGAAACUUAAAGUACGGAGUGUUAAGGUCA5' ( -27.30[72.61%] )
>RC-m0147_5p	|ppa013986m|PACid:17666730	|location[35,55]
5'UGAGCCAAGGAUGACUUGCCA3'
|||||x||||||||||||x||
3'ACUACUUAACGUUUCAUCAGACGACCACGUACUCGUUUCCUACUGAACAGUACUAUAACUUCUCGUUCGAGAGUUCCAAUC5' ( -28.00[67.31%] )
>RC-m0147_5p	|ppb011730m|PACid:17654135	|location[115,135]
5'UGAGCCAAGGAUGACUUGCCA3'
||||||||||||xx||||x||
3'AGGUACUGUCAAAAAAAAAAAAAAAAAAAAACUCGGUUCCUAGGGAACUGUCGUAAACUGAGCACGAAUUAAUAUUUCAAG5' ( -28.30[68.03%] )
>RC-m0147_5p	|ppa002833m|PACid:17661921	|location[137,157]
5'UGAGCCAAGGAUGACUUGCCA3'
||||||xx||||xx|||||||
3'CAGCACAACACUUACCGAAGCUCCCUCCAAACUCGGAACCUAACGAACGGUUUGCACUCUCCUUUAAGUCGAGACUAAGGC5' ( -27.80[66.67%] )
>RC-m0147_5p	|ppa006028m|PACid:17665799	|location[3,23]
5'UGAGCCAAGGAUGACUUGCCA3'
x|||||||||||||x||x||x
3'AGUUGUAGUCAACCGAACUUGGCUUUGGGUCCUCGGUUCCUACUAAAGGGGUA5' ( -29.50[71.08%] )
>RC-m0147_5p	|ppa007941m|PACid:17649823	|location[281,301]
5'UGAGCCAAGGAUGACUUGCCA3'
x|||||||||||||x||x||x
3'AGUUGUAGUCAACCGAACUUUGCUUUGGGUCCUCGGUUCCUACUAAAGGGGUACUCUCAGGGGGAUGGAUUAUUCUUGGGA5' ( -29.66[71.47%] )
>RC-m0148_5p	|ppa013986m|PACid:17666730	|location[35,55]
5'UGAGCCAAGGAUGACUUGCCA3'
|||||x||||||||||||x||
3'ACUACUUAACGUUUCAUCAGACGACCACGUACUCGUUUCCUACUGAACAGUACUAUAACUUCUCGUUCGAGAGUUCCAAUC5' ( -28.00[67.31%] )
>RC-m0148_5p	|ppb011730m|PACid:17654135	|location[115,135]
5'UGAGCCAAGGAUGACUUGCCA3'
||||||||||||xx||||x||
3'AGGUACUGUCAAAAAAAAAAAAAAAAAAAAACUCGGUUCCUAGGGAACUGUCGUAAACUGAGCACGAAUUAAUAUUUCAAG5' ( -28.30[68.03%] )
>RC-m0148_5p	|ppa002833m|PACid:17661921	|location[137,157]
5'UGAGCCAAGGAUGACUUGCCA3'
||||||xx||||xx|||||||
3'CAGCACAACACUUACCGAAGCUCCCUCCAAACUCGGAACCUAACGAACGGUUUGCACUCUCCUUUAAGUCGAGACUAAGGC5' ( -27.80[66.67%] )
>RC-m0148_5p	|ppa006028m|PACid:17665799	|location[3,23]
5'UGAGCCAAGGAUGACUUGCCA3'
x|||||||||||||x||x||x
3'AGUUGUAGUCAACCGAACUUGGCUUUGGGUCCUCGGUUCCUACUAAAGGGGUA5' ( -29.50[71.08%] )
>RC-m0148_5p	|ppa007941m|PACid:17649823	|location[281,301]
5'UGAGCCAAGGAUGACUUGCCA3'
x|||||||||||||x||x||x
3'AGUUGUAGUCAACCGAACUUUGCUUUGGGUCCUCGGUUCCUACUAAAGGGGUACUCUCAGGGGGAUGGAUUAUUCUUGGGA5' ( -29.66[71.47%] )
>RC-m0149_3p	|ppa000212m|PACid:17648698	|location[2790,2810]
5'GCAAGUUGUUCUUGGUUCUGU3'
||||o|xx|||||||||||x|
3'AGUAAGACAAGUGUUAUUGGCGAUUGUGCUCGUUUACAAAGAACCAAGAAACCUAUUGGUCUCUACGAUUACGAGGGAAGU5' ( -22.80[62.64%] )
>RC-m0149_3p	|ppa000360m|PACid:17662996	|location[3185,3205]
5'GCAAGUUGUUCUUGGUUCUGU3'
|||||||x|||||x|||||xo
3'UCAGCUCACCGAGUAGAAGAUCAACUAGCUCGUUCAAGAAGAAACAAGAAGCAUUACUUCUACGAAACCUAAACUCGACGC5' ( -22.40[61.54%] )
>RC-m0149_3p	|ppa004955m|PACid:17653696	|location[1482,1502]
5'GCAAGUUGUUCUUGGUUCUGU3'
||||||ox||||||||||ox|
3'AUUAGACCAACACCUAGACAUUUGGAAGGUCGUUCAGGAAGAACCAAGGGAGGUAGAGGUUGUCAAUACAUAUGUCCUCGA5' ( -29.40[80.55%] )
>RC-m0149_3p	|ppa006335m|PACid:17653697	|location[1111,1131]
5'GCAAGUUGUUCUUGGUUCUGU3'
||||||ox||||||||||ox|
3'AUUAGACCAACACCUAGACAUUUGGAAGGUCGUUCAGGAAGAACCAAGGGAGGUAGAGGUUGUCAAUACAUAUGUCCUCGA5' ( -29.40[80.55%] )
>RC-m0149_3p	|ppa017683m|PACid:17665155	|location[1421,1441]
5'GCAAGUUGUUCUUGGUUCUGU3'
|||xo|||||||||x||||x|
3'GGUUCUUUAUCUUUCGUGUGGAAUUGCUAUCGUGUAACAAGAACGAAGAGAGUUACUCAAGACGGCCUUGACUCGGACACU5' ( -22.90[62.74%] )
>RC-m0149_3p	|ppa000116m|PACid:17640347	|location[2342,2362]
5'GCAAGUUGUUCUUGGUUCUGU3'
||||x|||||||||||x||ox
3'GUGACAAGACGUUACCUCAUGGUCAAUAUUCGUUGAACAAGAACCACGAUUUAAGGUUCUCCCAACACAUGUUGACACGGA5' ( -25.30[69.70%] )
>RC-m0149_3p	|ppa004282m|PACid:17643684	|location[1312,1332]
5'GCAAGUUGUUCUUGGUUCUGU3'
||||xox|||||x||||||||
3'AUAGAACUGACCGCAACCAUCAACGAGACCCGUUAGUCAAGACCCAAGACAGGCACAAACUUGUUACGGAAGUUUCCAUGG5' ( -23.80[65.93%] )
>RC-m0149_3p	|ppa000885m|PACid:17642508	|location[2145,2165]
5'GCAAGUUGUUCUUGGUUCUGU3'
||||||x|||||||x||||||
3'CGUUACCUGGUUAAACAUUAGACCACGUUUCGUUCAUCAAGAACGAAGACACAAGAUACUCUCCAACUAUAACUGUGGUAG5' ( -27.80[76.37%] )
>RC-m0149_3p	|ppa003484m|PACid:17647186	|location[584,604]
5'GCAAGUUGUUCUUGGUUCUGU3'
x||x||||o||||||||x|||
3'AAAAAGAGCGGAGGUGGUUGGUGUCGUAGGAGUACAACGAGAACCAACACAAGUGCGUGUACGUUGAGGAGGAGAACGUGA5' ( -22.80[61.79%] )
>RC-m0149_3p	|ppa023426m|PACid:17652632	|location[1815,1835]
5'GCAAGUUGUUCUUGGUUCUGU3'
||||||x|||||||x||||||
3'CGUUACCUGGUUAAACAUUAGACCACGUUUCGUUCAUCAAGAACGAAGACACAAGAUGCUCUCCAACUAUAACUGUGGUAG5' ( -27.80[76.37%] )
>RC-m0151_5p	|ppa022342m|PACid:17645405	|location[305,327]
5'UGGUGGCAUGUAGGAGAUGUAGA3'
||x||o|||||||||||||x|o|
3'UCAAUAGAGAUCGAGUAGUACUUCAAACCGACAACUGUACAUCCUCUACCUUUACAGGUGUCUUUGUAAGUAUCUCUCCGGAC5' ( -29.20[65.32%] )
>RC-m0153_3p	|ppa019633m|PACid:17655045	|location[183,204]
5'AAGGGCAGGUUGAAGGCCAGUU3'
|||o|||ox|||||||||||x|
3'GUGAAGGACCGGACCUUUACCCUAAUGGUGUUCUCGUUAAACUUCCGGUCUAAAAUGACGAGACCUUUAACAACGGAGUUUG5' ( -30.40[68.62%] )
>RC-m0155_3p	|ppa006497m|PACid:17641133	|location[1416,1437]
5'CUUGAAGGAGAAUAGUGGAGAC3'
|||||||xx||||||x||||x|
3'GAGUUUUCAACGAGGGAAGUCGAGAACUCCGAACUUCAACUUAUCUCCUCCGUUUCCCGCGGGUAAUCCCUCUGCUCGUAAU5' ( -24.40[62.40%] )
>RC-m0155_3p	|ppa007291m|PACid:17642778	|location[757,778]
5'CUUGAAGGAGAAUAGUGGAGAC3'
||||||||||||x||||ox||x
3'GUACAACAUAAACUUCCGGGAGCUGAAGUAGAACUUCCUCUUCUCACUCCUCCGGUAUUAGCCUUACCCCACCGUACGGAUC5' ( -27.30[68.08%] )
>RC-m0155_3p	|ppa019415m|PACid:17651801	|location[664,685]
5'CUUGAAGGAGAAUAGUGGAGAC3'
||||||||||||xx|||ox|||
3'ACAACUUCUGGACGUUCGGACGGUGCAGUAGAACUUCCUCUUCCCACUGCUGUAAUCCUAGUCGUACUGGUCCAUUCGGUAU5' ( -27.20[68.34%] )
>RC-m0155_3p	|ppa022381m|PACid:17646171	|location[664,685]
5'CUUGAAGGAGAAUAGUGGAGAC3'
||||||||||||xx|||ox|||
3'ACAACUUCUGGACGUUCGGACGGUGCAGUAGAACUUCCUCUUCCCACUGCUGUAAUCCUAGUCGUACUGGUCCAUUCGGUAU5' ( -27.20[68.34%] )
>RC-m0156_3p	|ppa002972m|PACid:17646056	|location[495,515]
5'ACCCCGGGAAGCACACCAUUC3'
|||||o|o|||||x||||||x
3'AGUUUGUGUUGGAAGACUUAUGAUUGAGGUUGGGGUCUUUCGUUUGGUAACGGUAACAAUACUAACGACAAUGAUGAAAAA5' ( -30.20[68.95%] )
>RC-m0156_3p	|ppa001516m|PACid:17664660	|location[2196,2216]
5'ACCCCGGGAAGCACACCAUUC3'
|x|||||||||xx||||||||
3'CAACCUUGUUCAAACGACCUGUUUCUUUAUUCGGGCCCUUCUCGUGGUAAGGCCUUAAGUGGGCGCUGUAGAUCGACGUGG5' ( -30.70[70.09%] )
>RC-m0157_3p	|ppa005388m|PACid:17661234	|location[18,38]
5'UGCCAAAGGAGAUUUGCCCGG3'
||||||||x|||||||x||xx
3'GUGUCGGAGCAAAUACUGGGAUGGUUGGUUACGGUUUCGUCUAAACCGGAACGGAUACCUUCGGUAUA5' ( -26.10[62.14%] )
>RC-m0157_3p	|ppa011163m|PACid:17668494	|location[429,449]
5'UGCCAAAGGAGAUUUGCCCGG3'
||||xx|||||||||ox||||
3'GCCACCGAGUCGCUGACCUCGGCCUCGCCGACGGCCUCCUCUAAAUCGGCCACCUCUCGACCGGCCUCGGAAUCUUCCACC5' ( -27.70[65.33%] )
>RC-m0157_3p	|ppa004176m|PACid:17640993	|location[251,271]
5'UGCCAAAGGAGAUUUGCCCGG3'
x|||||||x|||x|||x||||
3'GAAAGAAAGCCGGAUUAAAUAGUGGUUCGGUCGGUUUCGUCUCAACAGGCCGAUUUCACGGCGUAUCCCGUUGUGACGAUU5' ( -25.40[60.33%] )
>RC-m0157_3p	|ppa025234m|PACid:17662545	|location[248,268]
5'UGCCAAAGGAGAUUUGCCCGG3'
x|||||||o|||x||||||x|
3'GAAAAAAGGAUGGUUCAAAUAGAGGUUCGGUCGGUUUCUUCUCAACGGGACGAUCCCAAGGUUUGUUUCGUUGGGGUCAAU5' ( -30.30[71.97%] )
>RC-m0159_5p	|ppa002073m|PACid:17648639	|location[74,95]
5'AGGAGAAGAAAGAGCGGGGACC3'
|o||||||||||||x||x|||x
3'CUAACGGAAACAACAUCAACUCCUUCAACUUUCUCUUCUUUCUCUCCGCUGUCGCAUCCAAAUCUAUUUUUCUUCAAUGUAA5' ( -29.30[64.40%] )
>RC-m0159_5p	|ppa013487m|PACid:17654318	|location[241,262]
5'AGGAGAAGAAAGAGCGGGGACC3'
||||||x||||||||x|x||x|
3'ACCACAGUCCGAGGGGCAAACUCUUGUACCUCCUCUGCUUUCUCGGCGCUAGGCUUCUGUCUUUGACCUACCGCUCCUCCUC5' ( -28.40[62.83%] )
>RC-m0159_5p	|ppa007515m|PACid:17647280	|location[261,282]
5'AGGAGAAGAAAGAGCGGGGACC3'
x||||||||||||||xo||x||
3'AUGUGGAGAACAACGUGAACUUCCCUUGUUACCUCUUCUUUCUCGGUCCAGGUAUUCUCUAACUACGUUUAAACCAAAUACU5' ( -34.10[75.44%] )
>RC-m0159_5p	|ppa007589m|PACid:17647281	|location[261,282]
5'AGGAGAAGAAAGAGCGGGGACC3'
x||||||||||||||xo||x||
3'AUGUGGAGAACAACGUGAACUUCCCUUGUUACCUCUUCUUUCUCGGUCCAGGUAUUCUCUAACUACGUUUAAACCAAAUACU5' ( -34.10[75.44%] )
>RC-m0159_5p	|ppa025042m|PACid:17665897	|location[594,615]
5'AGGAGAAGAAAGAGCGGGGACC3'
|||||x||x|||||||||o|||
3'CUAACCGUACCACUUACCACGUGCUCCUUCUCCUCCUCCUUCUCGCCCUUGGUACCGGGCUCCGGAGUAUUUUGGGACGACG5' ( -33.50[74.12%] )
>RC-m0161_3p	|ppa001073m|PACid:17644095	|location[2567,2587]
5'UGAAAAACUGAAGAAGAGCAA3'
||xx|||||||||||||||||
3'GUACCACGUACCGUACGGCCGGUGGUCCUUACCAUUUGACUUCUUCUCGUUUACGUCGUGUACGGAACUCUUGUCUACUAC5' ( -26.00[81.50%] )
>RC-m0161_3p	|ppa026786m|PACid:17656332	|location[2837,2857]
5'UGAAAAACUGAAGAAGAGCAA3'
|||x|||x|||||||||||x|
3'GGUACCGAAAACCUGACAGGGAAGAAAAACACUCUUUCACUUCUUCUCGCUCACUAUUCUCUUCGCACUCUUUCUUCGCUC5' ( -21.60[68.14%] )
>RC-m0161_3p	|ppb016836m|PACid:17656603	|location[647,667]
5'UGAAAAACUGAAGAAGAGCAA3'
||||x||||||||||x|||x|
3'UUCGUCGUGGUCUAAAUUCUCGUAAUAAAGACUUCUUGACUUCUUGUCGAUGGUCGAAAAGUACUCCUCCCCAAUCGAGAA5' ( -23.70[73.83%] )
>RC-m0161_3p	|ppa001197m|PACid:17666757	|location[612,632]
5'UGAAAAACUGAAGAAGAGCAA3'
||x|x|||||||||||x||||
3'CGGGUGAAUCUCUUAAGUGAGAGGGUUAACACCUAUUGACUUCUUCCCGUUUGAUACUCUUGUCCCGGAGAAAGACGACAG5' ( -20.30[63.84%] )
>RC-m0161_3p	|ppa012026m|PACid:17647707	|location[567,587]
5'UGAAAAACUGAAGAAGAGCAA3'
oo|||||||||xx||||||||
3'UUAUUAUACAAAAUGGGUUUGUGUUCCUGUGUUUUUUGACUCAUUCUCGUUUGUUCUUUUCGUACAUUAAGAGUGGAACUA5' ( -22.00[68.97%] )
>RC-m0161_3p	|ppa010547m|PACid:17641573	|location[166,186]
5'UGAAAAACUGAAGAAGAGCAA3'
|||||||||||||||o|xxx|
3'AUUCACUAGAUCGAAUUUAAUAUACGACGGACUUUUUGACUUCUUUUAAAUAUAAGCAUUAUUAUAUAAUAAAUAUAUUUA5' ( -21.90[68.01%] )
>RC-m0161_3p	|ppa006032m|PACid:17652783	|location[84,104]
5'UGAAAAACUGAAGAAGAGCAA3'
|o||x|||x|||||||||||x
3'CCAACGACUUCUACACUCUUACUAUUCUCUAUUUCUUGUCUUCUUCUCGUCCUUUAAUACUUCCUUUCUUCGGUACCUACG5' ( -21.40[67.30%] )
>RC-m0161_3p	|ppa004386m|PACid:17645781	|location[49,69]
5'UGAAAAACUGAAGAAGAGCAA3'
x||||||||||||||||ox||
3'CCCAAUUCAGUAGUCUCAACUUCGUUGGAUUCUUUUUGACUUCUUCUUAUUCUAUCCGUCCCGUCUUCUUAAACUACGUCU5' ( -23.60[74.21%] )
>RC-m0162_3p	|ppa019694m|PACid:17643533	|location[340,362]
5'UCAUUUGUGAUUAGUUGGGGAUA3'
||||||||||||||||||xoxx|
3'UAAUCGAGGUAACAUAAGAAAUGAUCUUAAAGUAAACACUAAUCAACCGUGCUCACCGAGGAUAAUUGGUGGUCUCCGAAAAG5' ( -27.80[74.53%] )
>RC-m0165_5p	|ppa024062m|PACid:17664782	|location[380,400]
5'GAGCCAAGGAUGAAUUGCCGG3'
o||||||||||||||||xxo|
3'AUAGUAAGGCUCAUUGACUACUAUAGUUACUUCGGUUCCUACUUAACUUUCAUAGGUGGAGUCAGAAGAGAAGUCCUGAUC5' ( -27.70[65.64%] )
>RC-m0165_5p	|ppa006634m|PACid:17655522	|location[1241,1261]
5'GAGCCAAGGAUGAAUUGCCGG3'
o|||||||o|||||||||||x
3'GGUAAGUAGAUACGGUGUUCGUGUUCUUGUUUCGGUUCUUACUUAACGGCGGACCGUUUGUGUAACGGUUUCUAUAUUGGU5' ( -34.70[82.03%] )
>RC-m0165_5p	|ppa006028m|PACid:17665799	|location[2,22]
5'GAGCCAAGGAUGAAUUGCCGG3'
|||||||||||||x||x||xo
3'GUUGUAGUCAACCGAACUUGGCUUUGGGUCCUCGGUUCCUACUAAAGGGGUA5' ( -29.50[69.91%] )
>RC-m0165_5p	|ppa007941m|PACid:17649823	|location[280,300]
5'GAGCCAAGGAUGAAUUGCCGG3'
|||||||||||||x||x||xo
3'GUUGUAGUCAACCGAACUUUGCUUUGGGUCCUCGGUUCCUACUAAAGGGGUACUCUCAGGGGGAUGGAUUAUUCUUGGGAA5' ( -29.50[69.91%] )
>RC-m0165_5p	|ppa007606m|PACid:17656532	|location[849,869]
5'GAGCCAAGGAUGAAUUGCCGG3'
|xo|||||x|||||||||||o
3'AAGGAAGUGCUCCCGAACUAACUGACGUAACCUGGUUCGUACUUAACGGCUAAGCGGAAGUGGUAAGAGCCAAAAGUGUAG5' ( -30.10[69.84%] )
>RC-m0165_5p	|ppa012173m|PACid:17666161	|location[698,718]
5'GAGCCAAGGAUGAAUUGCCGG3'
o|||||||o||||x|||||x|
3'GUGUUGUGGGUUAUUAAUGUUUUCAUUGGUUUCGGUUCUUACUAAACGGACUAUAUCUGUAACGUGUCGUCCCAAAGUGGG5' ( -29.00[68.72%] )
>RC-m0166_5p	|ppa024062m|PACid:17664782	|location[380,400]
5'GAGCCAAGGAUGAAUUGCCGG3'
o||||||||||||||||xxo|
3'AUAGUAAGGCUCAUUGACUACUAUAGUUACUUCGGUUCCUACUUAACUUUCAUAGGUGGAGUCAGAAGAGAAGUCCUGAUC5' ( -27.70[65.64%] )
>RC-m0166_5p	|ppa006634m|PACid:17655522	|location[1241,1261]
5'GAGCCAAGGAUGAAUUGCCGG3'
o|||||||o|||||||||||x
3'GGUAAGUAGAUACGGUGUUCGUGUUCUUGUUUCGGUUCUUACUUAACGGCGGACCGUUUGUGUAACGGUUUCUAUAUUGGU5' ( -34.70[82.03%] )
>RC-m0166_5p	|ppa006028m|PACid:17665799	|location[2,22]
5'GAGCCAAGGAUGAAUUGCCGG3'
|||||||||||||x||x||xo
3'GUUGUAGUCAACCGAACUUGGCUUUGGGUCCUCGGUUCCUACUAAAGGGGUA5' ( -29.50[69.91%] )
>RC-m0166_5p	|ppa007941m|PACid:17649823	|location[280,300]
5'GAGCCAAGGAUGAAUUGCCGG3'
|||||||||||||x||x||xo
3'GUUGUAGUCAACCGAACUUUGCUUUGGGUCCUCGGUUCCUACUAAAGGGGUACUCUCAGGGGGAUGGAUUAUUCUUGGGAA5' ( -29.50[69.91%] )
>RC-m0166_5p	|ppa007606m|PACid:17656532	|location[849,869]
5'GAGCCAAGGAUGAAUUGCCGG3'
|xo|||||x|||||||||||o
3'AAGGAAGUGCUCCCGAACUAACUGACGUAACCUGGUUCGUACUUAACGGCUAAGCGGAAGUGGUAAGAGCCAAAAGUGUAG5' ( -30.10[69.84%] )
>RC-m0166_5p	|ppa012173m|PACid:17666161	|location[698,718]
5'GAGCCAAGGAUGAAUUGCCGG3'
o|||||||o||||x|||||x|
3'GUGUUGUGGGUUAUUAAUGUUUUCAUUGGUUUCGGUUCUUACUAAACGGACUAUAUCUGUAACGUGUCGUCCCAAAGUGGG5' ( -29.00[68.72%] )
>RC-m0168_3p	|ppa014776m|PACid:17654130	|location[310,330]
5'AAGAUUAGAAGUAUGUAACCA3'
|xx|||||||||||||xx|||
3'UCGGGACAUUCUUCUAAACUGUGAUUUUCUUGGUAAUCUUCAUACAAAGGUUUAUCCUCUCAGUCCAAAUGUUGUAUUGAG5' ( -19.20[63.79%] )
>RC-m0169_5p	|ppa009842m|PACid:17660452	|location[1177,1199]
5'UAUAUUUAUAUUUUCCGUCGUUA3'
||||||||||||||||||||||x
3'GCAUCAUCUUGAUAUGCUCUUACUGCAGCUAUAUAAAUAUAAAAGGCAGCAACAUUUAAUUAAAUUAUGCCGCUAUAAAACAU5' ( -28.80[97.96%] )
>RC-m0172_3p	|ppa012437m|PACid:17648072	|location[161,180]
5'AAAGACUAAAAUACCCUUGA3'
|||||||||||xxx|||||x
3'ACGCCUCUAACUUCUCCUCCACCUCCACCUUUUCUGAUUUUCCAGGAACAAUGACGCCAACCCUCGUAGCAGAUCCUCGU5' ( -17.40[60.84%] )
>RC-m0172_3p	|ppa013211m|PACid:17655878	|location[447,466]
5'AAAGACUAAAAUACCCUUGA3'
|x|||||x|||||||||oo|
3'UGAAAUUUUUGAUCGGUUUUUGAGUCAAUUUAUCUGAGUUUAUGGGAGUUAUAAAUUUGAGUGUAUUUUGGAUUCUUCCU5' ( -21.30[74.48%] )
>RC-m0172_3p	|ppa017834m|PACid:17641445	|location[71,90]
5'AAAGACUAAAAUACCCUUGA3'
||||||||||||||||||o|
3'GAAGUGGUGGGAGUGUUUGGAUCUUUUAUCUUUCUGAUUUUAUGGGAAUUUUAUAUACCUUUUAACUUACCACAAUUUCA5' ( -26.30[92.28%] )
>RC-m0173_3p	|ppa007787m|PACid:17652905	|location[1209,1229]
5'UGUGGCAAAAGUUGGAUGCUA3'
|||||||||||x||o||o||x
3'UAGUGGAGUAGUUUUACUUUGCUGUUUCCAACACCGUUUUCCACUUAUGAAGGAUCUCUCAUUUGACCCUUCUUCAUUAUG5' ( -27.20[73.91%] )
>RC-m0173_3p	|ppa017497m|PACid:17660485	|location[262,282]
5'UGUGGCAAAAGUUGGAUGCUA3'
|x||o||||||||||||x||x
3'UGUCGAUAUUUGUACUCUGGCUUGGUAGCUAAACUGUUUUCAACCUAAGAGUCAGACAUCUAAGAGAACUUCGAAGAGACG5' ( -23.00[62.84%] )
>RC-m0175_3p	|ppa006497m|PACid:17641133	|location[1416,1437]
5'CUUGAAGGAGAAUAGUGGAGAC3'
|||||||xx||||||x||||x|
3'GAGUUUUCAACGAGGGAAGUCGAGAACUCCGAACUUCAACUUAUCUCCUCCGUUUCCCGCGGGUAAUCCCUCUGCUCGUAAU5' ( -24.40[62.40%] )
>RC-m0175_3p	|ppa007291m|PACid:17642778	|location[757,778]
5'CUUGAAGGAGAAUAGUGGAGAC3'
||||||||||||x||||ox||x
3'GUACAACAUAAACUUCCGGGAGCUGAAGUAGAACUUCCUCUUCUCACUCCUCCGGUAUUAGCCUUACCCCACCGUACGGAUC5' ( -27.30[68.08%] )
>RC-m0175_3p	|ppa019415m|PACid:17651801	|location[664,685]
5'CUUGAAGGAGAAUAGUGGAGAC3'
||||||||||||xx|||ox|||
3'ACAACUUCUGGACGUUCGGACGGUGCAGUAGAACUUCCUCUUCCCACUGCUGUAAUCCUAGUCGUACUGGUCCAUUCGGUAU5' ( -27.20[68.34%] )
>RC-m0175_3p	|ppa022381m|PACid:17646171	|location[664,685]
5'CUUGAAGGAGAAUAGUGGAGAC3'
||||||||||||xx|||ox|||
3'ACAACUUCUGGACGUUCGGACGGUGCAGUAGAACUUCCUCUUCCCACUGCUGUAAUCCUAGUCGUACUGGUCCAUUCGGUAU5' ( -27.20[68.34%] )
>RC-m0177_5p	|ppa016829m|PACid:17664950	|location[383,403]
5'CGUUUCCCACAGACGGCGCCA3'
|xx||||||||||||o|||||
3'UUAAACCGUAGGGCUUUUCGAGAAGAAGUAGGUAAGGGUGUCUGCUGCGGUUUGAUCAUGAUGAGUAGUAGCAGUAUAGCA5' ( -36.50[80.22%] )
>RC-m0177_5p	|ppa017269m|PACid:17666564	|location[383,403]
5'CGUUUCCCACAGACGGCGCCA3'
|xx||||||||||x|o|||||
3'UUAAACCGUAGGGCUUUUCGAGAAGAAGUAGGUAAGGGUGUCUACUGCGGUUUGAGCAUGAUGAGUAGUAGUAGUAUAGCA5' ( -30.80[67.69%] )
>RC-m0177_5p	|ppa021384m|PACid:17665826	|location[401,421]
5'CGUUUCCCACAGACGGCGCCA3'
|xx||||||||||||o|||||
3'UUAAACCGUAGGGCUUUUCGAGAAGAAGCAGGUAAGGGUGUCUGCUGCGGUUUGAUCAUGAUAAGUAGUAGCAGCAGUACA5' ( -38.10[83.74%] )
>RC-m0177_5p	|ppa022712m|PACid:17657756	|location[377,397]
5'CGUUUCCCACAGACGGCGCCA3'
|xx||||||||||x|o|||||
3'UUAAGCCGUAGGGUUUUUCGAGAAGAAGCAGAUAAGGGUGUCUACUGCGGUUUGACCUUGAUAAGUAGUAGCAGGAGUACA5' ( -32.40[71.21%] )
>RC-m0177_5p	|ppa014481m|PACid:17660552	|location[999,1019]
5'CGUUUCCCACAGACGGCGCCA3'
xo|||||||||||||||||||
3'UUCCCCUCUUACUGUCUUCAAAAAACACAGCUAAAGGGUGUCUGCCGCGGUUUCACAAUUGCGAGUUUUUACCAAGCCGUG5' ( -41.70[91.25%] )
>RC-m0179_5p	|ppa026108m|PACid:17664638	|location[95,116]
5'CGCUUUGGCAGGGGGUUUGGCA3'
|x||||||||||||x|||x|x|
3'AGGCGUAUCAGUGAACCGUACCGUUAGAGCGGGAAACCGUCCCCGAAAGCAUUCCUGGUGUUCUUGGCUUCGGAUGACACGA5' ( -29.60[63.25%] )
>RC-m0180_3p	|ppa019632m|PACid:17640866	|location[379,399]
5'UUAUUGGUCGGGGAUAGCAAA3'
x|||||o|||||x|||||||x
3'CCGUGUUCGAGAUUCUUGUUUUCCCUUGCAUAUAACUAGCCCGUAUCGUUGGGGCAGUCGAUUGUAAGAUGUCAUUUCGUU5' ( -28.30[77.32%] )
>RC-m0180_3p	|ppa020794m|PACid:17652172	|location[1270,1290]
5'UUAUUGGUCGGGGAUAGCAAA3'
||xo|x||||||||||||||x
3'UUAGUACCGUAAGUUAAAAAGACGAGCGUAAAGGAACAGCCCCUAUCGUUCGUAAAGUCGUUCCCACAACGGGGACGAUUG5' ( -28.20[77.05%] )
>RC-m0182_3p	|ppa008024m|PACid:17645464	|location[952,972]
5'CUGAGAUUGGUAGCAGGCUUA3'
x|x|||||o|||||||||x||
3'CCCCAACUUAAGGUAUUCAGGUAAGGCUAUAAGUCUAAUCAUCGUCCGUAUCUCUGUCCGAAGGGUCCGUGACUUCGAACU5' ( -27.40[70.62%] )
>RC-m0183_3p	|ppa026316m|PACid:17666307	|location[667,689]
5'GACCAAUAUAUUUCGUCGCGCAA3'
|||||||x||||||||||x|||x
3'GUUAUAUAAAGCAGCGCGUUUGUAAACGCGCUGGUUACAUAAAGCAGCCCGUGUUUAAACGCCAUCUCAUCUAGCUAGUACCA5' ( -30.60[76.69%] )
>RC-m0187_5p	|ppa019765m|PACid:17655115	|location[134,154]
5'GGAAUGUUGUCUGGCUCGAGG3'
o||x||||||||||||||xx|
3'AGUAUGGAGCUGGUCAGAAACUUAGUAGUCUCUAACAACAGACCGAGCAACCAAGACAGAGUCGUCUACUACUUCGUUUGA5' ( -29.60[70.14%] )
>RC-m0187_5p	|ppa000948m|PACid:17648147	|location[2175,2195]
5'GGAAUGUUGUCUGGCUCGAGG3'
ox||||||||||||||x||o|
3'UUAUCUCGUCCGUUAUGUCUUCGUUCAACAUAUUACAACAGACCGACCUUCCUCCUACCGUCCCGGCGAGCUGACGAUUCG5' ( -27.70[64.27%] )
>RC-m0187_5p	|ppa023304m|PACid:17651862	|location[134,154]
5'GGAAUGUUGUCUGGCUCGAGG3'
o||x||||||||||||||xx|
3'AGUAUGGAGCUGGUCAGAAACUUAGUAGUCUCUAACAACAGACCGAGCAACCAAGACAGAGUCGUCUACUACUUCGUUUGA5' ( -29.60[70.14%] )
>RC-m0187_5p	|ppa019730m|PACid:17660625	|location[807,827]
5'GGAAUGUUGUCUGGCUCGAGG3'
xx||||||||||||x|||||x
3'UCGUAAAGGUUUAACAUGUUGAGUUAUAUAGGUUACAACAGACCCAGCUCGAGAAGGUACUAGUUACGACGUAUAAGGAGU5' ( -27.60[63.74%] )
>RC-m0189_3p	|ppa016087m|PACid:17645514	|location[1482,1504]
5'ACAAAAGGGAGUAUAAGUGGACA3'
|x|x|||||||||||xx||||||
3'AGUUGACACGGAGUCCUGAAUUUUAUAGUAUUUCUUCCCUCAUAUCGACCUGUCGUCCGCGGUUUCGUCCGCGUCGGCAAGGU5' ( -25.60[65.47%] )
>RC-m0190_5p	|ppa000953m|PACid:17660995	|location[1275,1295]
5'CAGGAUUUGAGGUAGUAUGGC3'
|||||||||||||||||||||
3'AGGAGUCCCUUCUACGAGUCCAUGUUCUUCGUCCUAAACUCCAUCAUACCGUUUAGUAAUUUCGACUCACUUUCUUGAAAA5' ( -38.00[100.00%] )
>RC-m0190_5p	|ppa015762m|PACid:17660226	|location[1251,1271]
5'CAGGAUUUGAGGUAGUAUGGC3'
||o||||||||o|x||||||x
3'UCUAGUCCUUUCUAUGAGUCUAUGUUCUUUGUUCUAAACUCUACCAUACCAUUUAGUGACUUUGACUCUAUGUUGUUGGAA5' ( -25.90[67.80%] )
>RC-m0190_5p	|ppa019283m|PACid:17665029	|location[1266,1286]
5'CAGGAUUUGAGGUAGUAUGGC3'
||o||o|||||o|||||||||
3'AGGAGUCCUUUCUACGACUCCAUGUCCUUUGUUCUGAACUCUAUCAUACCGUCUAGUAAUUUUGACUCACUCUCUUGAAAA5' ( -32.90[86.13%] )
>RC-m0190_5p	|ppa020740m|PACid:17647985	|location[1251,1271]
5'CAGGAUUUGAGGUAGUAUGGC3'
||o||||||||o|x||||||x
3'UCUAGUCCUUUCUAUGAGUCUAUGUUCUUUGUUCUAAACUCUACCAUACCAUUUAGUGACUUUGACUCUAUGUUGUUGGAA5' ( -25.90[67.80%] )
>RC-m0190_5p	|ppa001591m|PACid:17644685	|location[1075,1095]
5'CAGGAUUUGAGGUAGUAUGGC3'
[truncated: 2,822 more rows]

## Sheet: RS miRNA-target Alingment File
miRNA Identity	Target Identity	Location
[truncated: 6,876 more rows]
